# Supplementary material
Source: publisher figshare collection journal article supplement (https://gsajournals.figshare.com/articles/dataset/_/6391991)
Supplement: Supplementary file 1 [file 1]

610 620 630 640 650 660 670 680 690 700 710  
 GRMZM2G418294 529 R E R V I G G G W Y L D V I P A T K R D P A A Q L V I F R N K D T M G L R S F V A G G K L L Q A N K M E F V F A S H S F D V E S W M L E G C S E Y C K L V R K N A V A L G V Y E V L G A P S E D G V V R L D 639  
 LOC\_Os10g38900 539 R E R V A C Y G W Y L D V V S K A T K R D P A A Q F L I T F R N K D T M G L R S F V A G G K L L Q V N K T M E F V F A S Y S F D V M E S W T L E G S L L D C C K L V R K T I P S V L V E Y Y E I L A A V S E E D G V T R L D 640  
 GRMZM2G476107 525 R C R V V G G G A T L D V S V N A T K R D P A A Q L V T F R N K D T M G L R S F V A G G K L L Q I N R K M E F V F A S H S F D V M E S W M L D G S L L E G S K L V I N C R N P S A V L D I C E I L A A P S E E D G V T R L D S P R W G L 650  
 AT1G01510 527 R C R T I N G G W F L D T L S N V K R D P A A Q I L A Y R N K D T V L G R S F A A G G K L L Q I N R R M E F V F A S H S F D V M E S V S L E G S L D E C R L V N C R N S A V L D V R V E L A W G D D G I T R I D 636  
 Eucgr.D02321 532 R C R V V G G G W F L D T I S N V T K R D P A A Q L V L R K E T I T L G R S F A A G G K L L Q I N R R M E F V F A S H S F D V M E S W T L E G S L D E C K L V N C R N S Q A V L E V R V E L A V G D D D G I T R I D 642  
 Potri.002G163200 (PIAN2) 539 R C R V K G G G W F L D A V S N T K R D P A A Q L V F V R S K D T I L G R S F A A G G K L L Q I N R R T E F V F A S H S F D V M E S W M L E G S L E E C R L V N C R N P L A V L V R V E I L A A G E D G V S R L D 648  
 SapurV1A.0099s0360 537 R C R V R G G G W F L D A V P I N T K R D P A T Q C L V F V R S K D T I L G R S F A A G G K L L Q I N R R M E F V F A S H S F D V M E S W M L E G S L E E C R L V N C R N P L A V L V R V E I L A A G E D G V S R L D 646  
 Potri.014G089400 (PIAN1) 556 R C R A K G G G W F L D A L S N V T K R D P A A Q L V F R N K D T I L G R S F A A G G K L L Q I N R R M E F V F A S H S F D V M E S W M L E G S L E E C R L V N C R N P L A I L D A R V E L A A A E D D G V T R L D 664  
 InjBAC8021 545 R C R V G G G G W F L D S V N I T K R D P A A Q C L V F V R S K D T I L G R S F A A G G K L L Q I N R R M E F V F A S H S F D V M E S W T L E G S L E E C R L V N C R N P L A I L D A R V E L A A A G E D G I T R L D 656  
 MpJAC81145 577 R C K G P C R G W R L D T M D V I Q D P R A Q C L V V V R N R D R I L G R S F A A G G K L L Q A K K L E I V F V N H T F D V M E S W I V E G S T I L D C T I T I S K F R G V S L D V S I E I L A A G E E D G V V R L S 688  
 MmJNp\_001185788 440 \_\_\_\_\_ 440  
 HsJAC62822 440 \_\_\_\_\_ 440  
 XlJNP\_001079151 440 \_\_\_\_\_ 440  
 DmJBA25287 383 \_\_\_\_\_ 383  
 Clustal Consensus
