# Supplementary material
Source: publisher figshare collection journal article supplement (https://gsajournals.figshare.com/articles/dataset/_/6391991)
Supplement: Supplementary file 1 [file 1]

## Sheet: DEG list
GeneID	Description	an-t1-1	an-t1-2	an-t1-3	an-t1-4	COL-1	COL-2	COL-3	COL-4	log2FC	FDR	Up_or_Down
AT1G13430	sulfotransferase 4C	1.03	6.63	2.05	0.31	0	0	0	0	10	0.00034	Up
AT3G46490	2-oxoglutarate (2OG) and Fe(II)-dependent oxygenase superfamily protein	0.41	2.09	0.25	0	0	0	0	0	10	0.0061	Up
AT1G10640	Pectin lyase-like superfamily protein	0.24	4.16	0.28	0	0	0	0	0	10	0.0087	Up
AT4G24275		2.02	12.33	0.65	0	0	0	0	0	9.8	0.0024	Up
AT5G57780		0.71	6.66	0.6	0	0	0	0	0	9.8	0.0023	Up
AT1G63710	cytochrome P450, family 86, subfamily A, polypeptide 7	0.21	3.11	0.55	0.55	0	0	0	0	9.7	0.00095	Up
AT1G29510	SAUR-like auxin-responsive protein family	2.57	5.79	0.86	1.05	0	0	0	0	9.4	0.0011	Up
AT5G20630	germin 3	31.53	379.06	50.42	4.06	0	0	0.83	0	9.2	0.0002	Up
AT1G65450	HXXXD-type acyl-transferase family protein	2.14	7.53	0.95	0.1	0	0.02	0	0	9.2	9.4e-05	Up
AT5G39860	basic helix-loop-helix (bHLH) DNA-binding family protein	0.53	3.85	0	0.06	0	0	0	0	9	0.0081	Up
AT5G18020	SAUR-like auxin-responsive protein family	1.85	6.06	0.71	0	0	0	0	0	8.8	0.0063	Up
AT4G38825	SAUR-like auxin-responsive protein family	1.51	6.47	0.55	0	0	0	0	0	8.8	0.0072	Up
AT5G44572		2.12	0.35	0	0	0	0	0	0	8.5	0.02	Up
AT2G28085	SAUR-like auxin-responsive protein family	0.49	4.84	1.58	0	0	0	0	0	8.5	0.0094	Up
AT1G59940	response regulator 3	0.04	2.1	0.39	0	0	0	0	0	8.5	0.013	Up
AT2G11405		18.05	12.92	15.71	16.87	0	0	0.18	0	8.4	5.3e-07	Up
AT1G75550	glycine-rich protein	0.61	5.24	0.35	0	0	0	0	0	8.4	0.013	Up
AT5G18030	SAUR-like auxin-responsive protein family	1.57	3.26	0.7	0.13	0	0	0	0	8.3	0.0077	Up
AT3G03840	SAUR-like auxin-responsive protein family	0.5	3.24	0.12	0.18	0	0	0	0	8.3	0.0096	Up
AT4G31470	CAP (Cysteine-rich secretory proteins, Antigen 5, and Pathogenesis-related 1 protein) superfamily protein	0.33	4.09	0.63	0	0	0	0	0	8.3	0.015	Up
AT3G55500	expansin A16	5.91	5.01	1.89	1.05	0	0	0	0.04	8.2	7.1e-06	Up
AT5G47440	Plant protein of unknown function (DUF828) with plant pleckstrin homology-like region	1.07	0.04	0.24	0.18	0	0	0	0	8.2	0.0091	Up
AT5G45960	GDSL-like Lipase/Acylhydrolase superfamily protein	0.2	0.58	0.03	0	0	0	0	0	8.2	0.016	Up
AT5G57090	Auxin efflux carrier family protein	0.14	0.51	0	0	0	0	0	0	8.2	0.028	Up
AT4G14650		0.91	5.34	0.38	0.08	0	0	0.03	0	8	0.00018	Up
AT1G29430	SAUR-like auxin-responsive protein family	0.8	2.08	0.13	0.38	0	0	0	0	8	0.011	Up
AT4G13450	Adenine nucleotide alpha hydrolases-like superfamily protein	0.53	1.09	0.59	0.19	0	0	0	0	8	0.007	Up
AT1G78520	Carbohydrate-binding X8 domain superfamily protein	0.18	3.14	0	0	0	0	0	0	8	0.04	Up
AT4G31970	cytochrome P450, family 82, subfamily C, polypeptide 2	0.91	0.22	0	0	0	0	0	0	7.9	0.037	Up
AT4G34170	Galactose oxidase/kelch repeat superfamily protein	0.58	0.84	0.75	0.27	0	0	0	0	7.9	0.0074	Up
AT1G61680	terpene synthase 14	0.53	0.3	0.11	0	0	0	0	0	7.9	0.017	Up
AT5G26120	alpha-L-arabinofuranosidase 2	0.42	0.07	0.06	0	0	0	0	0	7.9	0.019	Up
AT2G29680	cell division control 6	0.11	0.37	0.1	0.06	0	0	0	0	7.9	0.01	Up
AT5G18010	SAUR-like auxin-responsive protein family	0.84	2.94	0.17	0	0	0	0	0	7.8	0.025	Up
AT1G26945	basic helix-loop-helix (bHLH) DNA-binding superfamily protein	0.23	1.09	0.2	0	0	0	0	0	7.8	0.022	Up
AT4G03330	syntaxin of plants 123	0.13	1.11	0.25	0	0	0	0	0	7.8	0.021	Up
AT2G41850	polygalacturonase abscission zone A. thaliana	0.61	0.2	0	0	0	0	0	0	7.7	0.04	Up
AT5G18050	SAUR-like auxin-responsive protein family	0.5	3.36	0.18	0	0	0	0	0	7.7	0.027	Up
AT1G29490	SAUR-like auxin-responsive protein family	0.28	2.6	0	0	0	0	0	0	7.7	0.047	Up
AT4G17980	NAC domain containing protein 71	1.13	0.18	0.15	0.05	0	0	0	0	7.6	0.02	Up
AT1G65880	benzoyloxyglucosinolate 1	0.26	0.61	0	0	0	0	0	0	7.6	0.044	Up
AT2G30432	Homeodomain-like superfamily protein	0	0.98	0.06	0.04	0	0	0	0	7.6	0.039	Up
AT5G18060	SAUR-like auxin-responsive protein family	0	2.5	0.81	0	0	0	0	0	7.6	0.049	Up
AT4G31615	Transcriptional factor B3 family protein	0.42	0.3	0.09	0.07	0	0	0	0	7.5	0.017	Up
AT4G25433	peptidoglycan-binding LysM domain-containing protein	1.36	0.53	0.13	0.29	0	0	0	0	7.4	0.02	Up
AT2G26520		0.73	0.7	0.29	0	0	0	0	0	7.4	0.027	Up
AT3G03850	SAUR-like auxin-responsive protein family	0.58	1.7	0.14	0	0	0	0	0	7.4	0.036	Up
AT2G31550	SGNH hydrolase-type esterase superfamily protein	0.48	0.36	0.13	0.18	0	0	0	0	7.4	0.016	Up
AT2G22460	Protein of unknown function, DUF617	0.12	0.83	0.52	0.13	0	0	0	0	7.4	0.019	Up
AT4G14130	xyloglucan endotransglucosylase/hydrolase 15	9.56	16.23	2.01	0.52	0	0.19	0	0	7.3	0.00021	Up
AT5G63180	Pectin lyase-like superfamily protein	7.49	36.8	7.53	0.45	0	0.05	0.31	0	7.2	0.00017	Up
AT1G60590	Pectin lyase-like superfamily protein	1.26	9.1	1.73	0.28	0	0.02	0.04	0.02	7.2	3.2e-08	Up
AT1G78950	Terpenoid cyclases family protein	3.84	32.94	4.01	0.09	0.02	0.07	0.13	0.1	7.1	5.8e-06	Up
AT4G10910		0.33	1.34	0	0.09	0	0	0	0	7.1	0.045	Up
AT5G52270	SNARE-like superfamily protein	0.64	0.45	0	0.2	0	0	0	0	7	0.038	Up
AT3G44326	F-box family protein	0.34	0.46	0.14	0	0	0	0	0	7	0.044	Up
AT5G59580	UDP-glucosyl transferase 76E1	0.34	0.13	0.27	0	0	0	0	0	7	0.042	Up
AT2G37380		0.2	0.63	0.14	0	0	0	0	0	7	0.045	Up
AT4G19690	iron-regulated transporter 1	0.12	0.49	0.17	0	0	0	0	0	7	0.043	Up
AT2G10940	Bifunctional inhibitor/lipid-transfer protein/seed storage 2S albumin superfamily protein	30.07	381.31	46.06	8.61	0	0.76	3.35	0.07	6.9	0.00046	Up
AT5G18350	Disease resistance protein (TIR-NBS-LRR class) family	0.05	0.06	0.08	0.06	0	0	0	0	6.9	0.026	Up
AT5G49800	Polyketide cyclase/dehydrase and lipid transport superfamily protein	1.9	8.97	1.94	0.42	0	0.08	0	0.04	6.8	8.5e-07	Up
AT5G42785		0.35	0.65	0.1	0.07	0	0	0	0	6.8	0.041	Up
AT1G52770	Phototropic-responsive NPH3 family protein	0.93	4.4	1.02	0.27	0	0	0	0.06	6.7	2.7e-05	Up
AT5G22580	Stress responsive A/B Barrel Domain	10.06	159.29	14.88	0.75	0	0	1.27	0.78	6.6	0.0035	Up
AT3G23530	Cyclopropane-fatty-acyl-phospholipid synthase	1.17	4.91	0.6	0.06	0.05	0	0	0.03	6.6	0.00036	Up
AT3G29370		0.59	7.55	1.02	0.5	0	0	0	0.12	6.4	0.004	Up
AT3G61950	basic helix-loop-helix (bHLH) DNA-binding superfamily protein	0.93	3.03	0.65	0.2	0	0	0	0.06	6.2	0.00012	Up
AT5G37300	O-acyltransferase (WSD1-like) family protein	1.75	13.83	2.05	0.61	0	0.11	0.22	0	5.9	0.00096	Up
AT4G08040	1-aminocyclopropane-1-carboxylate synthase 11	1.27	0.43	0.34	0.04	0	0	0	0.03	5.9	0.0073	Up
AT1G29440	SAUR-like auxin-responsive protein family	1.52	3.68	0.59	0	0	0	0.1	0	5.8	0.017	Up
AT5G25880	NADP-malic enzyme 3	0.54	1.47	0.3	0.25	0	0	0.05	0	5.7	2.6e-05	Up
AT1G06980		0.08	3.34	0.45	0.24	0	0	0.08	0	5.7	0.017	Up
AT5G38970	brassinosteroid-6-oxidase 1	0.08	0.78	0.08	0	0	0	0	0.02	5.7	0.03	Up
AT5G24580	Heavy metal transport/detoxification superfamily protein	2.76	20.47	2.63	0.8	0.15	0	0.34	0.12	5.6	0.00024	Up
AT4G34760	SAUR-like auxin-responsive protein family	10.94	44.54	2.4	2.04	0	0.67	0.35	0.35	5.5	0.00014	Up
AT5G15780	Pollen Ole e 1 allergen and extensin family protein	4	58.64	6.15	1.96	0	0.42	0.84	0.4	5.5	0.00059	Up
AT3G45070	P-loop containing nucleoside triphosphate hydrolases superfamily protein	3.2	2.68	1.16	0.85	0	0	0.12	0.06	5.5	7.2e-06	Up
AT2G25810	tonoplast intrinsic protein 4;1	0.84	1.8	1.91	0.04	0	0	0.04	0.07	5.4	0.00049	Up
AT1G02810	Plant invertase/pectin methylesterase inhibitor superfamily	0.61	1.42	0.16	0.06	0	0.03	0.03	0	5.4	0.0022	Up
AT1G52750	alpha/beta-Hydrolases superfamily protein	5.02	13.22	2.21	1.2	0	0.13	0.44	0.02	5.3	0.00039	Up
AT5G66580		0.39	6.79	1.59	0.33	0	0.23	0	0	5.3	0.0021	Up
AT5G25980	glucoside glucohydrolase 2	1478.77	1527.47	429.65	242.31	24.91	37.93	37.81	3.63	5.2	9e-08	Up
AT5G24780	vegetative storage protein 1	131.54	16.38	8.83	0.94	1.62	0.6	1.08	1.29	5.2	0.00025	Up
AT3G22540	Protein of unknown function (DUF1677)	15.03	29.09	8.94	4.32	0	0.43	0.78	0.33	5.2	2.7e-10	Up
AT4G18970	GDSL-like Lipase/Acylhydrolase superfamily protein	2.18	12.39	0.54	0.34	0	0.21	0.11	0.13	5.2	0.00097	Up
AT3G48550		2.15	7.56	0.96	1.66	0	0.16	0	0.17	5.2	3.3e-05	Up
AT1G20190	expansin 11	1.15	19.82	3.12	0.63	0	0.31	0.32	0.09	5.2	0.001	Up
AT1G10550	xyloglucan:xyloglucosyl transferase 33	0.17	1.71	0.19	0.28	0	0	0	0.07	5.2	0.0045	Up
AT4G37800	xyloglucan endotransglucosylase/hydrolase 7	5.1	1.11	0.73	0.17	0.1	0	0.03	0.09	5.1	7.4e-05	Up
AT1G30280	Chaperone DnaJ-domain superfamily protein	3.83	9.86	1.67	1.06	0	0.09	0.4	0	5.1	0.0019	Up
AT4G22620	SAUR-like auxin-responsive protein family	3.54	0.3	0.55	0.13	0	0	0.13	0	5.1	0.036	Up
AT4G02290	glycosyl hydrolase 9B13	5.87	27.7	2.25	0.41	0.32	0.21	0.6	0.15	5	0.00026	Up
AT1G29500	SAUR-like auxin-responsive protein family	4.47	11.22	2.83	1.58	0	0.18	0.38	0.09	5	1.7e-06	Up
AT1G74055		3.45	6.24	2.42	1.77	0.17	0.1	0.21	0	5	3.8e-06	Up
AT5G15230	GAST1 protein homolog 4	3.43	32.03	2.28	0.88	0.31	0.4	0.42	0.18	5	0.00016	Up
AT3G28857	basic helix-loop-helix (bHLH) DNA-binding family protein	0.37	3.02	0.27	0	0	0.12	0	0	5	0.031	Up
AT2G36050	ovate family protein 15	0.26	0.85	0.52	0.05	0	0	0	0.05	5	0.028	Up
AT2G14900	Gibberellin-regulated family protein	2.85	16.42	0.46	0.33	0	0.15	0.37	0.21	4.9	0.0044	Up
AT5G03960	IQ-domain 12	0.25	2.45	0.15	0	0	0.1	0	0	4.9	0.031	Up
AT5G58080	response regulator 18	0.21	0.18	0.26	0.14	0	0	0	0.03	4.9	0.018	Up
AT5G14090		22.54	53.46	10.27	7.71	0.36	0.66	1.67	0.99	4.8	6e-08	Up
AT1G13420	sulfotransferase 4B	1.21	3.77	1.96	0.16	0.33	0	0	0	4.8	0.0022	Up
AT4G33790	Jojoba acyl CoA reductase-related male sterility protein	7.9	53.92	12.86	5.24	0.5	0.79	1.07	1.07	4.7	4e-07	Up
AT3G05890	Low temperature and salt responsive protein family	6.3	38.5	7.16	1.87	0	1.02	1.07	0.07	4.7	0.0032	Up
AT3G05858		0.81	1.35	0.5	0.37	0	0	0	0.11	4.7	0.031	Up
AT1G55200	Protein kinase protein with adenine nucleotide alpha hydrolases-like domain	0.25	0.75	0	0.07	0	0	0.04	0	4.7	0.035	Up
AT5G25310	Exostosin family protein	0.24	0.36	0.59	0.08	0	0	0.02	0.02	4.7	0.0036	Up
AT4G11780		0.16	1.43	0.28	0	0	0.03	0.03	0.03	4.6	0.013	Up
AT3G45060	high affinity nitrate transporter 2.6	7.49	1.52	0.14	0.1	0	0.34	0	0.09	4.5	0.046	Up
AT5G42235	Expressed protein	2.98	5.12	2.29	0.98	0.46	0	0.09	0.09	4.5	4.8e-05	Up
AT2G37640	Barwin-like endoglucanases superfamily protein	2.58	12.12	1.97	0.66	0.09	0.19	0.34	0.17	4.5	1.1e-06	Up
AT1G62520		1.56	1.82	0.56	1.35	0	0	0.17	0.06	4.5	6e-05	Up
AT4G16515		1.55	11.61	1.56	0	0	0.58	0	0.12	4.5	0.017	Up
AT3G14740	RING/FYVE/PHD zinc finger superfamily protein	0.9	0.75	0.37	0.05	0.07	0	0	0.04	4.5	0.01	Up
AT1G53520	Chalcone-flavanone isomerase family protein	0.83	2.96	0.34	0.08	0	0.19	0	0	4.5	0.0091	Up
AT3G22120	cell wall-plasma membrane linker protein	12.48	13.44	2.08	1.33	0	0.69	0.82	0	4.4	0.02	Up
AT3G59370	Vacuolar calcium-binding protein-related	4.4	18.57	4.24	1.82	0	0.58	0.7	0.17	4.4	1.3e-05	Up
AT4G30410	sequence-specific DNA binding transcription factors	4.23	10.09	1.65	0.48	0	0.38	0.4	0	4.4	0.00044	Up
AT1G29450	SAUR-like auxin-responsive protein family	2.11	3.9	0.32	0.82	0	0	0.11	0.22	4.4	0.0038	Up
AT3G05800	AtBS1(activation-tagged BRI1 suppressor 1)-interacting factor 1	1.6	8.71	0.36	0.13	0.2	0.24	0.06	0.06	4.4	0.0018	Up
AT5G50915	basic helix-loop-helix (bHLH) DNA-binding superfamily protein	19.74	10.53	1.21	1.22	0.1	0.53	0.38	0.78	4.3	0.00055	Up
AT3G03820	SAUR-like auxin-responsive protein family	3.14	15.45	0.61	0.89	0	0.2	0	0.83	4.3	0.0085	Up
AT5G65080	K-box region and MADS-box transcription factor family protein	3.12	5.11	6.17	4.94	0.43	0.52	0.04	0.09	4.3	1.1e-10	Up
AT1G13130	Cellulase (glycosyl hydrolase family 5) protein	0.76	1.09	0.71	0.66	0.12	0	0.02	0.06	4.3	4.3e-08	Up
AT5G25180	cytochrome P450, family 71, subfamily B, polypeptide 14	0.34	0.2	0.43	0	0	0	0.05	0	4.3	0.047	Up
AT3G05470	Actin-binding FH2 (formin homology 2) family protein	0.28	1.04	0.28	0.04	0	0	0	0.08	4.3	0.011	Up
AT3G12170	Chaperone DnaJ-domain superfamily protein	0.27	0.71	0.2	0.11	0	0.07	0	0	4.3	0.018	Up
AT2G20980	minichromosome maintenance 10	0.26	0.48	0.17	0.03	0	0.05	0	0	4.3	0.023	Up
AT1G04680	Pectin lyase-like superfamily protein	40.72	77.73	22.18	8.5	1.62	1.82	3.42	1.78	4.2	4.2e-08	Up
AT2G43620	Chitinase family protein	8.01	0.74	0.07	0.05	0	0.05	0.05	0.39	4.2	0.018	Up
AT4G17680	SBP (S-ribonuclease binding protein) family protein	2.06	4.81	1.58	1.06	0	0	0.44	0.09	4.2	0.00016	Up
AT5G19060		0.64	0.98	0.42	0.58	0	0.06	0	0.09	4.2	5.1e-05	Up
AT5G65730	xyloglucan endotransglucosylase/hydrolase 6	54.63	42.56	13.1	5.57	1.25	0.93	2.98	1.76	4.1	3.5e-06	Up
AT3G54260	TRICHOME BIREFRINGENCE-LIKE 36	44.03	53.42	18.5	10.99	0.46	1.71	4.21	1.28	4.1	4.6e-06	Up
AT2G06850	xyloglucan endotransglucosylase/hydrolase 4	39.71	137.5	20.93	4.55	1.19	3.37	4.83	3.4	4.1	0.00031	Up
AT2G45080	cyclin p3;1	6.02	8.48	5.24	2.45	0.13	0.45	0.47	0.31	4.1	8.2e-10	Up
AT5G38800	basic leucine-zipper 43	4.73	7.89	4.07	4.68	0.17	0.1	1.02	0	4.1	6.2e-06	Up
AT5G41900	alpha/beta-Hydrolases superfamily protein	3.4	10.43	3.37	2.4	0.26	0.04	0.67	0.22	4.1	1.1e-07	Up
AT2G47560	RING/U-box superfamily protein	1.93	3.24	1.83	2.87	0.1	0.06	0.37	0.06	4.1	1.1e-07	Up
AT1G55260	Bifunctional inhibitor/lipid-transfer protein/seed storage 2S albumin superfamily protein	1.8	2.7	0.53	0.6	0.06	0.19	0.07	0.03	4.1	2.4e-05	Up
AT5G14360	Ubiquitin-like superfamily protein	1.47	0.57	0.59	0.35	0	0	0.17	0	4.1	0.016	Up
AT3G06880	Transducin/WD40 repeat-like superfamily protein	1.11	2.19	0.63	0.27	0.05	0.06	0.08	0.07	4.1	7.3e-08	Up
AT1G66960	Terpenoid cyclases family protein	0.97	3.98	0.56	0.05	0.14	0	0.18	0.04	4.1	0.019	Up
AT1G70270		0.26	4.64	0.77	0.84	0	0.13	0.13	0.13	4.1	0.013	Up
AT2G27240	Aluminium activated malate transporter family protein	0.22	0.25	0.41	0.27	0	0	0.07	0	4.1	0.0023	Up
AT5G04970	Plant invertase/pectin methylesterase inhibitor superfamily	0.21	1.72	0.7	0.2	0	0	0.15	0.02	4.1	0.0031	Up
AT5G08480	VQ motif-containing protein	0.12	0.48	0.3	0.52	0	0	0.08	0	4.1	0.018	Up
AT4G35350	xylem cysteine peptidase 1	50.62	53.29	25.62	20.13	1.05	3.3	4.47	1.31	4	1.4e-13	Up
AT3G12610	Leucine-rich repeat (LRR) family protein	19.61	126.93	12.83	5.68	2.36	3.29	2.97	2.89	4	0.00036	Up
AT3G44990	xyloglucan endo-transglycosylase-related 8	15.85	8.57	4.33	3.53	0.22	1.05	0.55	0.31	4	1.2e-09	Up
AT3G20370	TRAF-like family protein	0.92	0.23	0.24	0.17	0	0	0	0.1	4	0.016	Up
AT1G17830	Protein of unknown function (DUF789)	0.65	0.24	0.13	0.12	0	0.02	0	0.05	4	0.0068	Up
AT1G22330	RNA-binding (RRM/RBD/RNP motifs) family protein	0.53	2.84	0.18	0.06	0	0.14	0.06	0.04	4	0.0041	Up
AT4G11050	glycosyl hydrolase 9C3	0.06	0.8	0.34	0.02	0	0.02	0.06	0	4	0.02	Up
AT3G16370	GDSL-like Lipase/Acylhydrolase superfamily protein	8.7	64.27	8.63	3.05	0.96	1.62	2.16	1.32	3.9	0.00044	Up
AT2G45400	NAD(P)-binding Rossmann-fold superfamily protein	2.45	2.72	0.8	0.63	0	0.24	0.05	0.15	3.9	1e-05	Up
AT4G03270	Cyclin D6;1	1.48	2.6	0.6	0.98	0	0.13	0.19	0.05	3.9	4.7e-05	Up
AT3G48490		1.18	3.1	1.13	0.41	0	0.28	0.1	0	3.9	0.0052	Up
AT1G31710	Copper amine oxidase family protein	0.87	1.49	0.25	0.09	0	0.01	0.08	0.1	3.9	0.00078	Up
AT3G46670	UDP-glucosyl transferase 76E11	0.74	1.46	0.88	0.36	0	0	0.24	0	3.9	0.0046	Up
AT1G35180	TRAM, LAG1 and CLN8 (TLC) lipid-sensing domain containing protein	0.3	2.35	0.33	0.32	0	0.07	0.11	0.04	3.9	0.0031	Up
AT3G10000	Homeodomain-like superfamily protein	0.2	0.07	0.2	0.42	0	0	0	0.06	3.9	0.029	Up
AT3G27690	photosystem II light harvesting complex gene 2.3	35.91	40.21	10.1	4.36	2.08	1.21	2.66	1.25	3.8	9.6e-08	Up
AT5G13140	Pollen Ole e 1 allergen and extensin family protein	11.26	24.1	9.28	4.39	0.08	0.57	2.74	0.2	3.8	0.0024	Up
AT4G23820	Pectin lyase-like superfamily protein	10.39	36.06	4.13	1.67	1.15	1.23	0.89	0.89	3.8	0.00038	Up
AT5G18080	SAUR-like auxin-responsive protein family	6.26	13.07	0.65	0.94	0.74	0	0.9	0	3.8	0.015	Up
AT2G32990	glycosyl hydrolase 9B8	4.85	11.24	6.98	0.86	0.29	0.36	0.47	0.75	3.8	1.6e-07	Up
AT2G44740	cyclin p4;1	4.11	6.58	2.81	1.74	0	0.29	0.52	0.26	3.8	1.3e-07	Up
AT1G12845		3.17	17.78	2.29	0.45	0	1.02	0.75	0	3.8	0.0094	Up
AT4G18670	Leucine-rich repeat (LRR) family protein	2.03	5.82	0.58	0.55	0.03	0.12	0.39	0.14	3.8	0.00012	Up
AT4G26140	beta-galactosidase 12	0.77	1.32	0.6	0.29	0	0.1	0.08	0.05	3.8	1.8e-06	Up
AT1G14430	glyoxal oxidase-related protein	0.52	2.41	0.98	0.1	0	0.15	0	0.15	3.8	0.0058	Up
AT2G34430	light-harvesting chlorophyll-protein complex II subunit B1	398.25	195.2	44.7	30.26	14.57	16.59	15.52	9.1	3.7	0.00011	Up
AT2G42540	cold-regulated 15a	8.55	142.3	34.95	10.08	4.03	5.24	4.03	2.76	3.7	0.00064	Up
AT2G13820	Bifunctional inhibitor/lipid-transfer protein/seed storage 2S albumin superfamily protein	7.57	10.69	5.51	2.77	0.23	0.6	1.26	0.11	3.7	6.4e-07	Up
AT4G22010	SKU5 similar 4	4.21	11.45	0.26	0.08	0.39	0.14	0.22	0.57	3.7	0.022	Up
AT5G01015		2.97	7.52	3.33	1.01	0.16	0.92	0	0.1	3.7	0.0013	Up
AT4G24265		2.81	4.7	2.61	1.06	0.33	0.1	0.51	0	3.7	0.00026	Up
AT1G14240	GDA1/CD39 nucleoside phosphatase family protein	0.73	0.69	0.6	0.27	0	0.08	0.1	0	3.7	0.00011	Up
AT5G61000	Replication factor-A protein 1-related	0.68	1.84	0.42	0.27	0.03	0.07	0.06	0.1	3.7	6.5e-05	Up
AT1G04020	breast cancer associated RING 1	0.6	1.12	0.19	0.23	0	0.06	0.02	0.08	3.7	0.00043	Up
AT4G32890	GATA transcription factor 9	0.47	0.77	0.61	0.65	0	0	0.14	0.05	3.7	0.0017	Up
AT4G14695	Uncharacterised protein family (UPF0041)	0.05	4.81	0.57	0.05	0.16	0.05	0.05	0.2	3.7	0.024	Up
AT1G57750	cytochrome P450, family 96, subfamily A, polypeptide 15	203.11	371.79	234.11	144.99	8.96	20.39	41.13	13.94	3.6	6e-13	Up
AT2G22170	Lipase/lipooxygenase, PLAT/LH2 family protein	25.24	47.21	12.65	8.19	0.52	2.72	3.37	1.5	3.6	2.2e-07	Up
AT1G75590	SAUR-like auxin-responsive protein family	13.35	20.27	10.91	7.24	1.38	1.14	1.41	0.56	3.6	3.4e-14	Up
AT3G46170	NAD(P)-binding Rossmann-fold superfamily protein	4.92	1.4	2.14	2.16	0	0.07	0.78	0	3.6	0.0026	Up
AT4G37730	basic leucine-zipper 7	2.39	2.63	1.62	0.57	0.08	0.19	0.3	0.05	3.6	3.8e-05	Up
AT3G10720	Plant invertase/pectin methylesterase inhibitor superfamily	1.35	2.3	0.22	0.02	0.1	0.13	0.12	0	3.6	0.01	Up
AT3G10570	cytochrome P450, family 77, subfamily A, polypeptide 6	1.26	11.54	2.38	1.22	0	0.27	0.96	0.21	3.6	0.0014	Up
AT4G39480	cytochrome P450, family 96, subfamily A, polypeptide 9	1.22	1.72	0.32	0	0	0.06	0.22	0	3.6	0.049	Up
AT5G54400	S-adenosyl-L-methionine-dependent methyltransferases superfamily protein	1.22	2.19	1.16	0.81	0.06	0.15	0.19	0.04	3.6	3.6e-06	Up
AT2G16580	SAUR-like auxin-responsive protein family	1.2	1.09	0.73	0.23	0	0.02	0.19	0.05	3.6	0.0005	Up
AT4G28680	L-tyrosine decarboxylase	0.25	1.37	0.2	0.13	0	0	0.17	0	3.6	0.039	Up
AT1G04800	glycine-rich protein	3.94	28.8	2.85	1.47	0.96	0.56	1.77	0.29	3.5	0.00092	Up
AT2G19970	CAP (Cysteine-rich secretory proteins, Antigen 5, and Pathogenesis-related 1 protein) superfamily protein	3.59	1.82	1.53	0.69	0	0.08	0.49	0.08	3.5	0.0015	Up
AT4G15830	ARM repeat superfamily protein	2.91	3.88	2.07	0.91	0	0.24	0.33	0.33	3.5	4.9e-06	Up
AT3G60550	cyclin p3;2	2.4	4.43	2.53	0.62	0.24	0.14	0.44	0.15	3.5	0.00015	Up
AT3G62160	HXXXD-type acyl-transferase family protein	1.5	4.02	1.19	0.83	0	0.29	0.38	0.04	3.5	0.00051	Up
AT3G52820	purple acid phosphatase 22	0.68	2.16	0.99	0.55	0	0.1	0.24	0.06	3.5	8e-05	Up
AT2G23560	methyl esterase 7	0.55	1.87	0.8	0.52	0	0.26	0.06	0	3.5	0.0056	Up
AT1G01200	RAB GTPase homolog A3	0.43	5.46	2.02	0.27	0	0.1	0.54	0.11	3.5	0.0071	Up
AT5G13060	ARMADILLO BTB protein 1	0.12	0.62	0.23	0.02	0	0	0.07	0.01	3.5	0.035	Up
AT4G26320	arabinogalactan protein 13	30.42	84.64	27.09	8	5.15	3.32	5.31	1.96	3.4	2.9e-06	Up
AT1G52190	Major facilitator superfamily protein	12.23	38.38	8.77	4.25	1.42	1.52	2.35	1.13	3.4	3.4e-05	Up
AT1G70710	glycosyl hydrolase 9B1	9.29	11.94	4.66	2.31	0.18	0.82	1.41	0.33	3.4	1.5e-06	Up
AT2G17880	Chaperone DnaJ-domain superfamily protein	3.9	5.89	0.36	0.2	0	0.3	0.76	0	3.4	0.036	Up
AT1G66370	myb domain protein 113	3.83	0.81	5.36	3.06	0	0.12	0.57	0.56	3.4	0.00024	Up
AT1G23205	Plant invertase/pectin methylesterase inhibitor superfamily protein	3.81	11.7	3.44	0.86	0	0.39	1.51	0.07	3.4	0.006	Up
AT1G05310	Pectin lyase-like superfamily protein	3.74	4.84	1.74	1.76	0	0.45	0.59	0.12	3.4	2.7e-05	Up
AT3G29030	expansin A5	2.23	19.83	2.58	0.88	0.34	0.83	0.57	0.89	3.4	0.00037	Up
AT3G18900		1.75	2.42	1.61	1.24	0.08	0.05	0.35	0.22	3.4	4.5e-08	Up
AT5G48310		0.51	0.85	0.28	0.11	0	0.05	0.09	0.03	3.4	0.00048	Up
AT5G11590	Integrase-type DNA-binding superfamily protein	0.46	1.02	0.52	0.16	0	0	0	0.2	3.4	0.038	Up
AT1G76420	NAC (No Apical Meristem) domain transcriptional regulator superfamily protein	0.22	0.49	0.37	0.71	0	0	0.1	0.06	3.4	0.0036	Up
AT5G26000	thioglucoside glucohydrolase 1	503.1	512.64	84.59	69.15	28.22	49.22	30.85	16.13	3.3	0.00027	Up
AT4G12730	FASCICLIN-like arabinogalactan 2	88.4	260.44	98.02	37.21	6.6	7.82	21.43	16.02	3.3	4.3e-05	Up
AT2G45220	Plant invertase/pectin methylesterase inhibitor superfamily	60.17	93.01	35.06	21.25	5.49	4.32	8.57	4.34	3.3	9.2e-12	Up
AT2G43050	Plant invertase/pectin methylesterase inhibitor superfamily	34.39	65.47	33.29	23.72	3.03	4.31	7.76	2.17	3.3	9.9e-12	Up
AT5G26670	Pectinacetylesterase family protein	7.11	13.08	4.13	2.31	0.33	0.82	1.29	0.34	3.3	8.2e-07	Up
AT5G44680	DNA glycosylase superfamily protein	6.04	28.15	4.61	2.43	0.28	1.16	2.08	0.85	3.3	0.0026	Up
AT3G48970	Heavy metal transport/detoxification superfamily protein	5.77	17.12	6.89	3.68	0.18	1.56	0.96	0.84	3.3	2.2e-06	Up
AT3G02170	longifolia2	3.84	15.4	0.96	0.43	1.15	0.48	0.13	0.6	3.3	0.019	Up
AT5G56120		3.19	4.37	1.42	0.52	0	0.61	0.2	0.2	3.3	0.0012	Up
AT2G27930	PLATZ transcription factor family protein	2.67	2.8	1.89	1.21	0	0.47	0.38	0	3.3	0.00052	Up
AT1G07450	NAD(P)-binding Rossmann-fold superfamily protein	1.9	7.69	2.19	1.01	0.29	0.29	0.57	0.26	3.3	5.1e-05	Up
AT3G51470	Protein phosphatase 2C family protein	1.72	6.37	2.01	0.48	0.14	0.04	0.95	0	3.3	0.015	Up
AT4G26660		1.26	1.56	0.93	0.35	0	0.14	0.13	0.16	3.3	2.5e-05	Up
AT5G41880	DNA primases;DNA primases	0.96	1.27	0.29	0.15	0	0.12	0.11	0.05	3.3	0.0017	Up
AT3G62570	Tetratricopeptide repeat (TPR)-like superfamily protein	0.89	2.79	0.17	0.61	0.24	0	0.12	0.14	3.3	0.0045	Up
AT5G01070	RING/FYVE/PHD zinc finger superfamily protein	0.78	0.81	1.5	0.64	0.14	0.08	0	0.17	3.3	0.0058	Up
AT3G13600	calmodulin-binding family protein	0.48	0.97	0.31	0.03	0	0.08	0	0.11	3.3	0.029	Up
AT5G42180	Peroxidase superfamily protein	211.91	571.31	214.37	133.96	16.71	27.66	61.34	23.42	3.2	8e-06	Up
AT1G64390	glycosyl hydrolase 9C2	30.92	98	37.21	14.83	4.55	5.34	6.93	4.3	3.2	3.5e-09	Up
AT1G45130	beta-galactosidase 5	8.85	29.61	6.73	3.25	1.13	1.27	2.46	0.77	3.2	0.00032	Up
AT4G23870		8.03	21.06	5.48	2.67	0	1.65	1.58	1.04	3.2	0.00053	Up
AT3G63200	PATATIN-like protein 9	3.45	3.6	2.17	1.86	0	0.67	0.37	0.22	3.2	4.1e-06	Up
AT3G14780		2.84	4.23	2.03	2.23	0.58	0.44	0.21	0.17	3.2	4.1e-09	Up
AT3G01550	phosphoenolpyruvate (pep)/phosphate translocator 2	2.6	2.92	0.39	0.23	0.13	0.21	0.27	0.11	3.2	0.0014	Up
AT1G61255		1.92	9.23	1.63	0.36	0	0.22	0.68	0.56	3.2	0.013	Up
AT2G28850	cytochrome P450, family 710, subfamily A, polypeptide 3	0.95	1.78	0.71	0.17	0	0.04	0.37	0	3.2	0.031	Up
AT2G24970		0.72	0.48	0.37	0.22	0	0.2	0	0	3.2	0.049	Up
AT2G34030	Calcium-binding EF-hand family protein	0.7	1.53	0.7	0.54	0	0.15	0.16	0.05	3.2	0.00012	Up
AT1G03010	Phototropic-responsive NPH3 family protein	0.65	1.08	0.18	0.09	0	0.16	0.02	0.04	3.2	0.014	Up
AT1G06340	Plant Tudor-like protein	0.58	5.08	1.45	0.88	0	0.64	0	0.25	3.2	0.02	Up
AT4G02320	Plant invertase/pectin methylesterase inhibitor superfamily	0.22	0.27	0.16	0.02	0	0	0.02	0.05	3.2	0.047	Up
AT4G09060		0.21	0.72	0.13	0.17	0	0.07	0	0.07	3.2	0.019	Up
AT4G31760	Peroxidase superfamily protein	0.18	0.38	0.21	0.27	0	0	0.11	0	3.2	0.048	Up
AT5G59810	Subtilase family protein	0.05	0.17	0.09	0.16	0	0.02	0.02	0.02	3.2	0.027	Up
AT4G23690	Disease resistance-responsive (dirigent-like protein) family protein	43.33	127.68	29.26	20.08	6.42	5.89	10.04	4.43	3.1	2.7e-07	Up
AT2G03090	expansin A15	41.51	111.56	71.72	32.57	4.33	8.49	14.04	4.92	3.1	2.8e-09	Up
AT2G34620	Mitochondrial transcription termination factor family protein	17.73	22.4	8.07	6.07	0.27	1.79	3.26	1.53	3.1	1.3e-05	Up
AT5G65390	arabinogalactan protein 7	10.99	55.39	7.82	4.01	0.8	3.42	3.51	2.41	3.1	0.00054	Up
AT5G20740	Plant invertase/pectin methylesterase inhibitor superfamily protein	10.3	24.27	11.97	6.85	0.95	1.39	2.98	1.08	3.1	5.9e-08	Up
AT2G47930	arabinogalactan protein 26	7.51	28.06	4.36	2.74	1.28	1.66	1.74	0.77	3.1	0.00018	Up
AT5G50820	NAC domain containing protein 97	6.91	13.23	8.22	5.87	1	0.59	1.85	0.74	3.1	1.4e-09	Up
AT5G08000	glucan endo-1,3-beta-glucosidase-like protein 3	2.08	3.46	0.27	0.83	0.16	0.21	0.32	0.13	3.1	0.00057	Up
AT3G62390	TRICHOME BIREFRINGENCE-LIKE 6	1.95	3.19	0.48	0.41	0	0.21	0.28	0.25	3.1	0.0023	Up
AT5G15580	longifolia1	1.79	10.35	1.79	1.2	0.17	0.43	0.85	0.45	3.1	0.00018	Up
AT5G44390	FAD-binding Berberine family protein	1.41	1.19	0.31	0.23	0	0.1	0.11	0.15	3.1	0.0015	Up
AT1G44900	minichromosome maintenance (MCM2/3/5) family protein	1.29	1.58	0.58	0.26	0.02	0.08	0.17	0.18	3.1	0.00014	Up
AT5G03840	PEBP (phosphatidylethanolamine-binding protein) family protein	1.04	1.89	0.83	0.17	0.09	0.25	0.16	0	3.1	0.012	Up
AT1G20870	HSP20-like chaperones superfamily protein	0.69	1.49	0.95	0.31	0	0.07	0.18	0.15	3.1	0.0013	Up
AT2G03210	fucosyltransferase 2	0.54	1.14	0.42	0.31	0	0	0	0.29	3.1	0.049	Up
AT2G15300	Leucine-rich repeat protein kinase family protein	0.28	0.3	0.33	0.41	0	0.02	0.08	0.05	3.1	0.0023	Up
AT4G14750	IQ-domain 19	0.17	1.38	0.2	0.21	0	0.1	0.14	0	3.1	0.041	Up
AT1G60460		0.14	0.3	0.13	0.07	0.06	0	0.02	0.02	3.1	0.023	Up
AT1G35720	annexin 1	247.08	251.34	61.26	44.98	15.45	22.54	22.58	17.92	3	3.6e-05	Up
AT1G02205	Fatty acid hydroxylase superfamily	77.56	202.64	99.82	53.92	5.61	14.72	31.81	7.44	3	0.0003	Up
AT3G08030	Protein of unknown function, DUF642	40.87	32.03	8.77	5.99	2.4	3.13	3.69	2.53	3	1.2e-06	Up
AT4G37450	arabinogalactan protein 18	29.64	62.07	24.21	9.31	3.83	3.35	4.63	4.5	3	3.2e-08	Up
AT2G36870	xyloglucan endotransglucosylase/hydrolase 32	23.18	35.49	17.66	7.38	2.37	2.53	5.11	1.49	3	1.2e-07	Up
AT4G09990	Protein of unknown function (DUF579)	19.77	48	22.6	6.81	3.88	2.56	3.87	2.8	3	1.1e-07	Up
AT5G01190	laccase 10	15.01	29.21	17.75	8.26	1.79	1.64	4.58	1.31	3	2.7e-08	Up
AT3G25130		14.83	30.39	9.73	6.59	1.99	1.56	3.44	1.16	3	2.2e-07	Up
AT4G33810	Glycosyl hydrolase superfamily protein	4.16	4.18	3.42	3.52	0.13	0.57	0.81	0.45	3	5e-13	Up
AT1G05260	Peroxidase superfamily protein	3.17	4.82	1.9	2.08	0	0.56	0.77	0.22	3	0.00013	Up
AT2G29890	villin-like 1	2.37	4.45	2.38	0.81	0.09	0.19	0.69	0.33	3	2.7e-05	Up
AT3G53530	Chloroplast-targeted copper chaperone protein	2.3	7.12	3.43	1.5	0.35	0.37	0.89	0.28	3	1.3e-05	Up
AT3G30180	brassinosteroid-6-oxidase 2	2.22	6.22	0.49	0.6	0.2	0.5	0.35	0.22	3	0.00085	Up
AT1G23480	cellulose synthase-like A3	1.87	3.46	0.76	0.71	0	0.44	0.38	0.09	3	0.0026	Up
AT2G40550	E2F target gene 1	1.65	1.33	0.58	0.46	0.18	0.1	0.22	0.04	3	6.5e-05	Up
AT3G43960	Cysteine proteinases superfamily protein	1.37	2.23	1.87	0.56	0	0.22	0.42	0.11	3	0.00053	Up
AT3G02150	plastid transcription factor 1	1	0.46	0.16	0.11	0.06	0.14	0	0.04	3	0.036	Up
AT4G23020		0.9	2.02	1.75	0.65	0	0.3	0.31	0.05	3	0.00062	Up
AT3G23740		0.68	1.39	0.21	0.09	0	0	0.17	0.14	3	0.04	Up
AT5G07510	glycine-rich protein 14	0.44	0.57	0.71	1.04	0	0	0.27	0.05	3	0.015	Up
AT3G25950	TRAM, LAG1 and CLN8 (TLC) lipid-sensing domain containing protein	0.31	0.55	0.15	0.33	0.09	0.05	0	0.05	3	0.042	Up
AT4G39070	B-box zinc finger family protein	0.26	0.39	0.43	0.12	0	0.04	0.11	0	3	0.041	Up
AT1G24320	Six-hairpin glycosidases superfamily protein	0.21	0.15	0.11	0.24	0.06	0.01	0.03	0	3	0.0039	Up
AT2G05070	photosystem II light harvesting complex gene 2.2	65.32	49.94	17.19	12.02	2.08	7.95	6.48	3.3	2.9	5e-06	Up
AT4G24780	Pectin lyase-like superfamily protein	64.58	108.27	35.94	22.15	7.54	8.27	13.01	4.07	2.9	1.3e-07	Up
AT1G02640	beta-xylosidase 2	31.31	44.84	13.78	11.02	3.33	3.19	6.84	1.29	2.9	0.00026	Up
AT3G59900	auxin-regulated gene involved in organ size	29.88	7.24	0.84	1.4	0.54	1.83	2	1.15	2.9	0.0094	Up
AT1G29670	GDSL-like Lipase/Acylhydrolase superfamily protein	28.06	37.09	10.49	4.5	1.81	3.84	4.15	2.04	2.9	1.4e-05	Up
AT1G26450	Carbohydrate-binding X8 domain superfamily protein	20.74	23.85	14.42	10.09	3.46	2.4	3.04	1.22	2.9	7.3e-12	Up
AT4G12420	Cupredoxin superfamily protein	18.35	46.65	9.21	4.02	2.03	2.03	3.6	3.58	2.9	0.0015	Up
AT4G20050	Pectin lyase-like superfamily protein	6.96	7.55	5.07	4.61	0.54	1.04	1.19	0.65	2.9	3.6e-17	Up
AT1G01900	subtilase family protein	5.7	17.92	4.51	2.86	1.14	1.21	1.77	0.45	2.9	2.3e-05	Up
AT5G59720	heat shock protein 18.2	4.96	6.01	2.52	1.75	0.72	0.25	0.61	0.61	2.9	3.5e-05	Up
AT4G18630	Protein of unknown function (DUF688)	2.88	2.33	1.46	1.04	0.32	0.28	0.16	0.36	2.9	6.5e-07	Up
AT3G04540	Cysteine-rich protein	2.76	5.69	4.56	4.31	0	1.01	1.33	0	2.9	0.0044	Up
AT5G52340	exocyst subunit exo70 family protein A2	2.43	3.59	1.99	1.99	0.06	0.32	0.78	0.21	2.9	6.8e-06	Up
AT5G06250	AP2/B3-like transcriptional factor family protein	1.9	5.26	1.81	1.51	0	0.71	0.39	0.3	2.9	0.0004	Up
AT3G52630	Nucleic acid-binding, OB-fold-like protein	1.11	2.61	0.57	0.34	0	0.08	0.4	0.16	2.9	0.025	Up
AT5G03390	Protein of unknown function (DUF295)	1	0.89	0.5	0.29	0.06	0	0.14	0.17	2.9	0.0044	Up
AT1G11730	Galactosyltransferase family protein	0.74	1.81	0.9	0.83	0.08	0.27	0.12	0.14	2.9	8.9e-06	Up
AT2G16230	O-Glycosyl hydrolases family 17 protein	0.49	1.15	0.46	0.18	0	0.06	0.21	0.04	2.9	0.0084	Up
AT4G12690	Plant protein of unknown function (DUF868)	0.44	1.23	0.23	0.17	0	0	0.12	0.16	2.9	0.044	Up
AT1G47990	gibberellin 2-oxidase 4	0.22	1.15	1.09	0.41	0.14	0.03	0.23	0.03	2.9	0.0061	Up
AT2G04780	FASCICLIN-like arabinoogalactan 7	73.24	98.48	50.31	35.56	6.75	8.39	15.74	7.69	2.8	1.8e-11	Up
AT4G28250	expansin B3	55.18	132.13	88.56	59.83	5.69	13.31	26.52	6.01	2.8	6.1e-07	Up
AT2G38870	Serine protease inhibitor, potato inhibitor I-type family protein	47.58	54.64	14.2	9.39	2.91	11.08	4.31	1.08	2.8	0.0062	Up
AT5G47330	alpha/beta-Hydrolases superfamily protein	36.13	9.11	8.03	8.98	1.34	2.38	3.93	1.51	2.8	5.2e-06	Up
AT2G28950	expansin A6	31.73	60.64	15.17	8.95	2.36	5.85	5.82	4.12	2.8	5.9e-06	Up
AT5G39320	UDP-glucose 6-dehydrogenase family protein	28.68	59.76	24.45	10.7	3.18	3.82	6.41	4.93	2.8	5.9e-08	Up
AT4G36360	beta-galactosidase 3	23.64	53.9	20.32	10.43	3.23	3.7	5.64	4.06	2.8	2.2e-08	Up
AT1G16490	myb domain protein 58	15.88	20.17	15.45	13.47	0.6	2.63	5.05	1.18	2.8	1.4e-06	Up
AT5G02890	HXXXD-type acyl-transferase family protein	10.88	16.99	8.15	4.13	0.71	2.04	2.67	0.65	2.8	1.1e-05	Up
AT1G14250	GDA1/CD39 nucleoside phosphatase family protein	10.34	2	2.38	0.83	1.13	0.71	0.22	0.32	2.8	0.0011	Up
AT5G07030	Eukaryotic aspartyl protease family protein	9.01	50.15	15.08	9.5	0.42	2.67	7.49	2.25	2.8	0.015	Up
AT3G53190	Pectin lyase-like superfamily protein	7.1	7.65	2.55	1.44	0.85	0.59	0.87	0.53	2.8	1.7e-06	Up
AT4G25860	OSBP(oxysterol binding protein)-related protein 4A	6.98	11.61	7.03	6.81	1.32	1.23	2.24	0.24	2.8	1.7e-06	Up
AT2G29440	glutathione S-transferase tau 6	5.43	0.85	1.13	0.24	0	0.48	0.23	0.39	2.8	0.023	Up
AT5G53250	arabinogalactan protein 22	5.18	20.76	4.18	4.53	0.66	1.25	2.01	1.19	2.8	0.00016	Up
AT1G80730	zinc-finger protein 1	4.35	6.48	2.38	2.44	0.87	0.57	0.93	0.13	2.8	7.4e-05	Up
AT3G13175		2.95	5	2.36	0.65	0.5	0.88	0.1	0.2	2.8	0.0056	Up
AT1G55180	phospholipase D alpha 4	2.3	2.16	2.12	1.53	0.04	0.36	0.26	0.52	2.8	9.4e-08	Up
AT1G07370	proliferating cellular nuclear antigen 1	2.03	3.08	0.94	0.37	0.07	0.12	0.44	0.34	2.8	0.0039	Up
AT5G26230		1.43	5.84	1.98	0.69	0.1	0.23	0.72	0.47	2.8	0.0041	Up
AT4G14819	Protein of unknown function (DUF1677)	1.04	3.39	1.84	1.71	0	0.33	0.82	0	2.8	0.019	Up
AT2G21830	Cysteine/Histidine-rich C1 domain family protein	1.01	3.46	0.73	0.89	0.05	0.32	0.14	0.42	2.8	0.0013	Up
AT4G21250	Sulfite exporter TauE/SafE family protein	0.99	1.04	0.69	0.58	0.17	0	0.17	0.17	2.8	0.00054	Up
AT3G20460	Major facilitator superfamily protein	0.81	1.81	0.86	0.58	0.11	0.16	0.26	0.1	2.8	5.9e-06	Up
AT1G53140	Dynamin related protein 5A	0.64	0.87	0.42	0.59	0.18	0.07	0.15	0.02	2.8	9.5e-05	Up
AT3G02590	Fatty acid hydroxylase superfamily protein	0.5	0.59	0.44	0.37	0.17	0.14	0	0	2.8	0.025	Up
AT2G41170	F-box family protein	0.3	2.98	0.13	0.44	0.25	0.12	0.09	0.15	2.8	0.017	Up
AT1G29930	chlorophyll A/B binding protein 1	3313.55	2639.07	738.53	705.24	301.87	398.63	318.32	193.99	2.7	8.4e-07	Up
AT5G67070	ralf-like 34	29.14	81.47	30.81	12.56	2.43	6.74	7.82	8.08	2.7	1.7e-05	Up
AT1G69530	expansin A1	23.63	30.56	6.3	4.92	3.02	3.35	1.78	2.33	2.7	1.5e-05	Up
AT5G03260	laccase 11	18.6	18.41	13.09	10.22	1.46	3.27	3.2	2.1	2.7	3.2e-14	Up
AT2G35700	ERF family protein 38	12.72	43.8	19.44	24.7	1.03	4.41	7.37	3.22	2.7	1.3e-05	Up
AT3G15720	Pectin lyase-like superfamily protein	12.2	2.67	0.79	1.29	0.51	0.75	0.94	0.52	2.7	0.002	Up
AT1G06090	Fatty acid desaturase family protein	9.16	6.5	3.55	4.24	0.17	1.13	1.12	1.21	2.7	1.5e-06	Up
AT1G28390	Protein kinase superfamily protein	7.64	12.58	4.38	2.65	0.67	1.64	1.11	0.98	2.7	1.8e-06	Up
AT1G25230	Calcineurin-like metallo-phosphoesterase superfamily protein	5.54	12.25	1.47	0.71	1.37	0.64	0.45	0.86	2.7	0.0025	Up
AT3G57010	Calcium-dependent phosphotriesterase superfamily protein	4.99	11.55	7.11	4.16	0.22	1.83	1.51	0.98	2.7	1.3e-05	Up
AT5G41460	Protein of unknown function (DUF604)	4.15	8.64	4.4	2.81	0.23	1.2	1.16	0.69	2.7	3.8e-06	Up
AT2G38320	TRICHOME BIREFRINGENCE-LIKE 34	4.1	5.33	3.37	1.63	0.26	0.5	1.12	0.47	2.7	3.2e-06	Up
AT5G35670	IQ-domain 33	3.62	11.93	3.29	2.11	1.34	0.63	1.16	0.4	2.7	0.00012	Up
AT3G24450	Heavy metal transport/detoxification superfamily protein	3.27	8.22	2.55	0.89	0.42	0.67	0.93	0.4	2.7	0.00033	Up
AT5G03120		3.1	10.35	1.01	0.27	0.63	0.12	1.4	0.38	2.7	0.033	Up
AT1G52240	RHO guanyl-nucleotide exchange factor 11	3.05	7.1	2.61	1.35	0.37	0.72	0.9	0.3	2.7	1.7e-05	Up
AT1G27120	Galactosyltransferase family protein	2.66	6.61	1.95	1.03	0.73	0.51	0.47	0.4	2.7	3.8e-05	Up
AT2G33330	plasmodesmata-located protein 3	2.2	7.05	2.12	1.23	0.58	0.47	0.74	0.32	2.7	7.7e-05	Up
AT5G66330	Leucine-rich repeat (LRR) family protein	2.16	8.5	3.35	1.91	1.17	0.6	0.87	0.08	2.7	0.0013	Up
AT5G61570	Protein kinase superfamily protein	1.75	3.68	1.91	1.26	0.09	0.41	0.48	0.4	2.7	7.5e-06	Up
AT4G14940	amine oxidase 1	1.27	1.78	1.25	0.6	0.26	0.09	0.37	0.09	2.7	8.5e-05	Up
AT5G60500	Undecaprenyl pyrophosphate synthetase family protein	1.19	2.84	1.97	0.81	0	0.17	0.66	0.24	2.7	0.0043	Up
AT5G07720	Galactosyl transferase GMA12/MNN10 family protein	1.09	4.79	1.73	0.23	0	0.38	0.59	0.32	2.7	0.02	Up
AT4G35620	Cyclin B2;2	0.64	1.49	0.42	0.14	0.09	0.26	0.05	0.05	2.7	0.013	Up
AT1G16070	tubby like protein 8	0.39	1.09	0.26	0.1	0	0.06	0.18	0.06	2.7	0.041	Up
AT1G04250	AUX/IAA transcriptional regulator family protein	0.28	3.79	0.64	0.47	0.21	0.2	0.16	0.28	2.7	0.007	Up
AT3G01500	carbonic anhydrase 1	858.99	1152.55	543.56	383.21	122.81	114.59	242.18	30.86	2.6	0.00036	Up
AT4G03210	xyloglucan endotransglucosylase/hydrolase 9	54.92	71.72	19.34	13.92	5.88	7.69	9.34	5.36	2.6	3.2e-06	Up
AT3G52370	FASCICLIN-like arabinogalactan protein 15 precursor	50.68	81.92	63.6	36.96	3.82	8.73	21.7	5.85	2.6	2.2e-06	Up
AT1G56150	SAUR-like auxin-responsive protein family	33.52	16.72	6.51	4.88	3.62	3.07	2.44	1.97	2.6	0.00018	Up
AT2G42530	cold regulated 15b	27.22	149.4	42.24	15.73	9.73	9.16	14.01	7.67	2.6	0.0027	Up
AT1G09540	myb domain protein 61	11.51	39.67	12.37	10.81	2.7	3.01	4.95	2.29	2.6	1.4e-06	Up
AT3G49330	Plant invertase/pectin methylesterase inhibitor superfamily protein	11.31	30.15	7.54	2.99	1.08	1.26	5.93	1.08	2.6	0.0058	Up
AT2G23690		9.62	5.03	2.96	4.18	0.45	1.05	1.65	0.48	2.6	3.1e-05	Up
AT2G28470	beta-galactosidase 8	8.85	14.41	5.9	4.66	1.29	1.04	2.62	1.14	2.6	1.3e-07	Up
AT4G39330	cinnamyl alcohol dehydrogenase 9	7.43	29.75	5.5	4.67	1.11	3.14	2.73	1.68	2.6	0.00027	Up
AT5G45970	RAC-like 2	7.05	15.21	8.88	4.48	0.32	1.42	3.47	1.01	2.6	0.00023	Up
AT5G11540	D-arabinono-1,4-lactone oxidase family protein	5.95	11.07	4.9	3	0.3	1.3	2.08	0.55	2.6	0.00011	Up
AT1G48480	receptor-like kinase 1	4.63	13.83	3.23	2.73	0.39	0.99	2.16	0.87	2.6	0.00041	Up
AT1G76240	Arabidopsis protein of unknown function (DUF241)	4.63	16.14	8.82	7.32	0.81	1.57	2.86	1.25	2.6	5.3e-06	Up
AT3G06770	Pectin lyase-like superfamily protein	3.89	9.2	2.18	1.59	1.08	0.56	0.91	0.45	2.6	9e-05	Up
AT2G21540	SEC14-like 3	3.71	8.84	3.17	1.24	0.59	0.73	1.08	0.55	2.6	2.3e-05	Up
AT4G23720	Protein of unknown function (DUF1191)	3.2	3.26	0.82	0.44	1.02	0.2	0.21	0.05	2.6	0.022	Up
AT1G75780	tubulin beta-1 chain	2.73	21.81	2.79	1.39	0.52	0.94	2.14	1.41	2.6	0.029	Up
AT3G12870		2.65	2.99	1.56	0.93	0	0.94	0.3	0.1	2.6	0.015	Up
AT2G35210	root and pollen arfgap	2.63	8.55	6.8	2.41	0.34	0.62	1.74	0.84	2.6	0.00011	Up
AT2G40150	TRICHOME BIREFRINGENCE-LIKE 28	2.37	4.99	3.03	1.07	0.22	0.29	1.06	0.44	2.6	0.00038	Up
AT4G24430	Rhamnogalacturonate lyase family protein	1.58	1	0.89	0.84	0	0.17	0.42	0.1	2.6	0.0008	Up
AT3G44770	Protein of unknown function (DUF626)	1.57	2.56	2.24	1.36	0	0.21	0.77	0.36	2.6	0.0018	Up
AT2G30395	ovate family protein 17	1.47	2.8	1.93	1.62	0	0.38	0.54	0.33	2.6	0.00023	Up
AT1G31990		1.44	0.79	1.04	0.3	0	0.23	0.19	0.14	2.6	0.0061	Up
AT1G66360	Calcium-dependent lipid-binding (CaLB domain) family protein	1.26	4.01	1.63	1.46	0	0.4	0.68	0.29	2.6	0.0016	Up
AT5G49870	Mannose-binding lectin superfamily protein	1.11	0.76	0.41	1.2	0	0.17	0.39	0.03	2.6	0.012	Up
AT4G07960	Cellulose-synthase-like C12	1.05	1.08	0.59	0.47	0	0.23	0.06	0.24	2.6	0.0016	Up
AT4G28190	Developmental regulator, ULTRAPETALA	1	2.46	0.82	0.63	0.62	0.13	0.08	0.08	2.6	0.0043	Up
AT5G14180	Myzus persicae-induced lipase 1	0.84	1.39	0.34	0.23	0.06	0.08	0.18	0.16	2.6	0.0025	Up
AT1G02380		0.53	0.58	0.22	0.13	0	0.15	0.06	0.03	2.6	0.033	Up
AT5G15150	homeobox 3	0.28	1.37	0.16	0.24	0	0.05	0.17	0.14	2.6	0.043	Up
AT3G50130	Plant protein of unknown function (DUF247)	0.17	0.59	0.33	0.3	0	0.08	0.14	0	2.6	0.036	Up
AT5G59290	UDP-glucuronic acid decarboxylase 3	187.76	340.87	183.98	100.51	25.27	31.9	57.18	34.21	2.5	3.8e-09	Up
AT5G39190	germin-like protein 2	60.2	49.62	47.69	43.47	2.03	12.49	17.77	4.9	2.5	2.3e-05	Up
AT5G05390	laccase 12	55.11	125.53	57.75	37.2	7.86	10.09	26.32	8.09	2.5	5.5e-06	Up
AT5G59305		53.52	84.24	44.08	39.24	6.09	10.91	20.99	2.05	2.5	7.9e-05	Up
AT4G16980	arabinogalactan-protein family	19.07	101.28	12.46	4.87	11.69	3.44	6.42	4.58	2.5	0.033	Up
AT2G39900	GATA type zinc finger transcription factor family protein	13.83	22.11	7.62	4.63	1.07	2.6	2.9	2.22	2.5	7.9e-06	Up
AT5G59870	histone H2A 6	13.72	34.66	8.19	4.53	1.92	3.14	3.52	2.82	2.5	0.00017	Up
AT1G47655	Dof-type zinc finger DNA-binding family protein	13.6	14.85	8.42	6.03	0.75	3.05	3.27	0.9	2.5	3.9e-05	Up
AT2G44790	uclacyanin 2	13.29	12.81	2.57	3.9	1.43	1.67	1.05	1.99	2.5	6.7e-05	Up
AT5G56540	arabinogalactan protein 14	11.28	24.51	8.78	5.37	1.84	2.98	2.63	2.1	2.5	3.4e-05	Up
AT5G25190	Integrase-type DNA-binding superfamily protein	9.22	3.87	2.02	1.35	1.15	0.67	0.83	0.44	2.5	0.0011	Up
AT3G24535		8.71	9.31	4.04	6.26	0	1.55	2.82	0.75	2.5	0.0022	Up
AT3G07320	O-Glycosyl hydrolases family 17 protein	7.84	8.66	4.64	2.26	0.69	1	0.96	1.66	2.5	2.2e-06	Up
AT4G35030	Protein kinase superfamily protein	6.55	6.7	5.21	4.38	0.24	1.17	1.89	0.9	2.5	2.1e-06	Up
AT3G02120	hydroxyproline-rich glycoprotein family protein	6.13	9.95	4.57	1.67	0.65	1.43	0.8	1.28	2.5	0.00042	Up
AT1G36940		5.63	8.76	3.99	2.84	0.8	0.82	1.5	0.82	2.5	6.1e-07	Up
AT5G55730	FASCICLIN-like arabinogalactan 1	5.46	21.81	6.02	3.29	0.87	2.26	2.02	1.99	2.5	0.00024	Up
AT1G78090	trehalose-6-phosphate phosphatase	4.27	6.47	3.88	2.51	0.35	0.7	1.55	0.6	2.5	5.1e-06	Up
AT5G01790		4.19	9.99	7.71	4.6	1.01	1.39	1.39	1.14	2.5	1.8e-07	Up
AT1G27940	P-glycoprotein 13	3.97	7.86	5.41	4.07	0.62	0.82	1.94	0.6	2.5	2.7e-07	Up
AT5G23370	GRAM domain-containing protein / ABA-responsive protein-related	3.82	9.18	2.9	3.15	0.75	0.44	2.16	0.26	2.5	0.0023	Up
AT1G61795	PAK-box/P21-Rho-binding family protein	3.14	6.18	3.47	2.08	0.79	0.63	0.79	0.56	2.5	6.6e-07	Up
AT4G21890		2.93	3.03	2.91	1.58	0	1.22	0.12	0.52	2.5	0.0067	Up
AT2G25270		2.81	2.26	1.21	1.47	0.21	0.43	0.39	0.34	2.5	4.2e-08	Up
AT4G17280	Auxin-responsive family protein	2.38	5.78	1.95	0.62	0.57	0.33	0.84	0.24	2.5	0.0017	Up
AT5G10260	RAB GTPase homolog H1E	2.16	4.02	1.85	0.97	0.33	0.15	0.81	0.44	2.5	0.00082	Up
AT4G39810	Polynucleotidyl transferase, ribonuclease H-like superfamily protein	1.62	3.04	1.41	0.91	0	0.99	0.22	0.11	2.5	0.022	Up
AT4G01460	basic helix-loop-helix (bHLH) DNA-binding superfamily protein	1.48	4.11	1.05	1.39	0.05	0.4	0.93	0.08	2.5	0.01	Up
AT5G02760	Protein phosphatase 2C family protein	1.37	0.34	0.19	0.31	0	0.06	0.26	0.06	2.5	0.046	Up
AT2G14620	xyloglucan endotransglucosylase/hydrolase 10	1.3	2.31	0.55	1.07	0.28	0.28	0.08	0.33	2.5	0.0011	Up
AT1G76310	CYCLIN B2;4	1.09	1.43	0.94	0.36	0	0.12	0.42	0.16	2.5	0.0074	Up
AT1G18370	ATP binding microtubule motor family protein	0.99	1.53	0.6	0.32	0.13	0.08	0.22	0.24	2.5	0.00044	Up
AT3G52110		0.75	2.43	1.03	0.36	0	0.42	0.28	0.15	2.5	0.014	Up
AT4G29550	Protein of unknown function (DUF626)	0.56	0.48	0.22	0.35	0	0.18	0.11	0	2.5	0.047	Up
AT5G66660	Protein of unknown function (DUF677)	0.56	1.61	0.81	0.86	0.5	0.05	0.1	0.15	2.5	0.0091	Up
AT4G22370		0.55	0.71	0.58	0.59	0.17	0.05	0.2	0.05	2.5	0.0084	Up
AT4G16970	Protein kinase superfamily protein	0.36	0.54	0.3	0.13	0	0.01	0.16	0.07	2.5	0.021	Up
AT1G75640	Leucine-rich receptor-like protein kinase family protein	0.24	0.38	0.25	0.09	0	0.1	0.05	0.02	2.5	0.024	Up
AT5G44130	FASCICLIN-like arabinogalactan protein 13 precursor	164.31	219.1	177.3	127.16	17.83	28.95	70.74	23.25	2.4	3.2e-07	Up
AT1G68725	arabinogalactan protein 19	105.3	163.13	136.64	83.15	12.8	15.21	51.6	17.86	2.4	1.9e-06	Up
AT2G45180	Bifunctional inhibitor/lipid-transfer protein/seed storage 2S albumin superfamily protein	63.52	133.47	14.43	8.09	11.13	10.9	13.71	9.94	2.4	0.024	Up
AT1G03820		52.77	66.06	28.6	12.67	3.86	7.1	11.53	9.96	2.4	3.8e-05	Up
AT3G53620	pyrophosphorylase 4	39.79	54.86	38.51	19.76	4.63	7.52	12.47	6.38	2.4	1.8e-08	Up
AT5G01360	Plant protein of unknown function (DUF828)	25.94	67.93	41.98	27.73	3.15	8.4	16	6.12	2.4	1.7e-05	Up
AT2G23130	arabinogalactan protein 17	25.2	12.21	2.92	2.37	0.93	2.7	1.98	2.74	2.4	0.0034	Up
AT5G39160	RmlC-like cupins superfamily protein	17.45	20.06	14.89	11.54	0.71	4.69	6.1	1.17	2.4	0.00031	Up
AT3G18170	Glycosyltransferase family 61 protein	15.01	35.66	25.36	20.41	1.52	4.57	8.58	4.41	2.4	4.5e-06	Up
AT5G48920	tracheary element differentiation-related 7	10.09	12.17	7.29	7.22	2.18	1.79	2.9	0.46	2.4	8.2e-06	Up
AT5G35960	Protein kinase family protein	6.67	14.54	7.58	4.97	0.55	1.66	3.36	1.18	2.4	8.8e-05	Up
AT3G26125	cytochrome P450, family 86, subfamily C, polypeptide 2	5.4	6.36	5.42	4.16	0.49	1.26	2.12	0.45	2.4	1.8e-05	Up
AT2G18890	Protein kinase superfamily protein	5.2	8.49	6.07	2.93	0.9	0.99	1.89	0.81	2.4	2.5e-07	Up
AT1G66810	Zinc finger C-x8-C-x5-C-x3-H type family protein	5.17	18.1	8.96	5.63	1.35	2.17	2.95	1.22	2.4	2.6e-05	Up
AT1G71015		5.08	3.47	2	1.39	0	1.4	0.53	0.46	2.4	0.0097	Up
AT5G07800	Flavin-binding monooxygenase family protein	4.89	10.75	5.74	3.79	0.55	1.68	2.33	0.51	2.4	0.00011	Up
AT3G02500		4.04	3.59	1.29	1.62	0.34	1.06	0.46	0.23	2.4	0.00027	Up
AT5G23400	Leucine-rich repeat (LRR) family protein	3.74	7.45	2.68	1.43	0.52	0.87	0.67	1.11	2.4	9.1e-05	Up
AT1G30080	Glycosyl hydrolase superfamily protein	3.68	7.23	2.53	2.67	0.27	0.96	1.25	0.67	2.4	3.7e-05	Up
AT3G51740	inflorescence meristem receptor-like kinase 2	3.62	3.99	1.61	1.27	0.54	0.35	0.78	0.47	2.4	1.2e-05	Up
AT2G28690	Protein of unknown function (DUF1635)	3.61	2.75	1.77	1.41	0	0.54	0.99	0.35	2.4	0.0038	Up
AT5G23350	GRAM domain-containing protein / ABA-responsive protein-related	2.74	9.75	1.86	1.25	0.53	1.19	1.36	0.16	2.4	0.013	Up
AT5G14450	GDSL-like Lipase/Acylhydrolase superfamily protein	2.64	2.67	0.66	0.45	0.58	0.41	0	0.39	2.4	0.031	Up
AT5G07700	myb domain protein 76	2.38	1.37	0.56	0.26	0.24	0.37	0	0.29	2.4	0.037	Up
AT2G42900	Plant basic secretory protein (BSP) family protein	2.11	9.03	4.1	0.21	0.98	0.7	1.13	0.33	2.4	0.023	Up
AT4G33270	Transducin family protein / WD-40 repeat family protein	2.02	2.69	1.52	0.58	0	0.24	0.58	0.52	2.4	0.0078	Up
AT5G37000	Exostosin family protein	1.79	2.33	1.42	1.87	0.32	0.51	0.51	0.17	2.4	6.4e-07	Up
AT3G51280	Tetratricopeptide repeat (TPR)-like superfamily protein	1.78	2.84	1.22	0.53	0.67	0.1	0.44	0.13	2.4	0.0057	Up
AT5G38300		1.76	3.31	1.8	0.96	0.47	0.71	0.17	0.23	2.4	0.0014	Up
AT4G30860	SET domain group 4	1.49	1.04	0.81	0.74	0.19	0.13	0.27	0.23	2.4	3.1e-06	Up
AT4G32830	ataurora1	1.46	3.22	1.65	0.71	0.24	0.39	0.44	0.35	2.4	0.00018	Up
AT2G31980	PHYTOCYSTATIN 2	1.43	1.5	0.54	0.48	0	0.07	0.53	0.15	2.4	0.047	Up
AT4G00400	glycerol-3-phosphate acyltransferase 8	1.29	4.12	0.66	0.58	0.29	0.21	0.55	0.28	2.4	0.0035	Up
AT4G34320	Protein of unknown function (DUF677)	1.27	0.6	0.69	0.72	0.11	0.1	0.28	0.17	2.4	0.0008	Up
AT3G08790	ENTH/VHS/GAT family protein	0.96	0.8	0.45	0.29	0	0.13	0.26	0.1	2.4	0.0066	Up
AT4G02060	Minichromosome maintenance (MCM2/3/5) family protein	0.79	1.48	0.59	0.34	0.14	0.14	0.29	0.09	2.4	0.00056	Up
AT4G05190	kinesin 5	0.78	1.63	0.55	0.33	0.08	0.13	0.28	0.15	2.4	0.00064	Up
AT3G53010	Domain of unknown function (DUF303)	0.48	1.18	0.29	0.3	0.2	0	0.2	0.08	2.4	0.045	Up
AT5G49780	Leucine-rich repeat protein kinase family protein	0.46	0.56	0.37	0.29	0.13	0.05	0.14	0.03	2.4	0.0011	Up
AT2G47460	myb domain protein 12	0.29	0.86	0.53	0.94	0.06	0.09	0.14	0.21	2.4	0.00064	Up
AT2G37090	Nucleotide-diphospho-sugar transferases superfamily protein	83.35	126.12	93.42	67.09	10.36	19.23	36.04	11.08	2.3	2.3e-07	Up
AT2G39700	expansin A4	74.26	96.16	52.06	40.36	9.58	12.75	22.8	11.5	2.3	1e-08	Up
AT2G28760	UDP-XYL synthase 6	45.99	83.31	59.08	31.34	7.72	9.3	19.93	8.87	2.3	7.5e-08	Up
AT5G24800	basic leucine zipper 9	44.65	41.32	20.45	25.4	6.23	6.71	10.01	4.79	2.3	2.2e-10	Up
AT3G20820	Leucine-rich repeat (LRR) family protein	28.2	51.39	14.31	13.84	4.95	4.2	8.67	5.33	2.3	9e-06	Up
AT3G50410	OBF binding protein 1	14.33	13.46	8.53	8.66	0.6	2.9	3.16	2.88	2.3	3.3e-06	Up
AT1G63295	Remorin family protein	13.25	14.19	10.6	10.26	2.54	2.28	3.7	1.7	2.3	5.7e-14	Up
AT1G08440	Aluminium activated malate transporter family protein	12.77	13.15	14.08	16.65	2.87	3.04	4.17	2.23	2.3	3.6e-23	Up
AT1G68200	Zinc finger C-x8-C-x5-C-x3-H type family protein	10.93	33.44	18.3	9.97	1.87	3.3	7.43	2.59	2.3	6.9e-05	Up
AT5G38610	Plant invertase/pectin methylesterase inhibitor superfamily protein	9.52	12.25	4.59	3.69	1.05	2.06	2.88	0.39	2.3	0.0015	Up
AT1G12080	Vacuolar calcium-binding protein-related	8.14	41.01	8.98	3.43	3.41	2.92	5.22	1.58	2.3	0.0044	Up
AT1G45010	TRAM, LAG1 and CLN8 (TLC) lipid-sensing domain containing protein	7.62	16.67	10.88	6.7	1.53	2.68	2.67	2.08	2.3	8.4e-09	Up
AT1G10657	Plant protein 1589 of unknown function	7.58	10.68	3.2	2.91	1.54	1.19	1.07	1.41	2.3	2.3e-05	Up
AT2G44260	Plant protein of unknown function (DUF946)	6.61	7.56	8.12	7.4	0.4	1.82	2.7	1.35	2.3	2.4e-06	Up
AT3G48340	Cysteine proteinases superfamily protein	5.31	5.39	2.34	1.49	0.34	1	1.05	0.62	2.3	0.00022	Up
AT2G30010	TRICHOME BIREFRINGENCE-LIKE 45	5.08	11.61	5.05	2.27	1.04	1.2	1.7	1.31	2.3	1.3e-05	Up
AT5G62500	end binding protein 1B	4.03	6.61	2.91	2.15	1.2	0.72	0.8	0.77	2.3	8.9e-07	Up
AT2G47010		2.85	3.58	1.79	1.14	0.75	0.54	0.38	0.43	2.3	1.8e-05	Up
AT1G65890	acyl activating enzyme 12	2.58	0.42	1.32	0.59	0	0.32	0.2	0.52	2.3	0.025	Up
AT3G52550		2.5	3.27	2.02	1.55	0.73	0.99	0.3	0.07	2.3	0.0043	Up
AT5G36960		2.49	2.04	1.56	0.95	0.54	0.36	0.38	0.28	2.3	0.00011	Up
AT3G15270	squamosa promoter binding protein-like 5	2.48	0.87	1.88	1.77	0.31	0.24	0.25	0.68	2.3	0.00098	Up
AT5G15900	TRICHOME BIREFRINGENCE-LIKE 19	2.44	4.15	5.57	2.75	0.16	0.55	1.5	0.89	2.3	0.00029	Up
AT1G66380	myb domain protein 114	2.38	2.05	2.94	2.15	0	1.03	0.29	0.68	2.3	0.0022	Up
AT5G16486	RNA-directed DNA polymerase (reverse transcriptase)-related family protein	2.32	5.21	3.78	2.15	0	1.02	1.17	0.48	2.3	0.0037	Up
AT3G10660	calmodulin-domain protein kinase cdpk isoform 2	2	1.62	1.01	1.03	0.28	0.53	0.09	0.34	2.3	0.00015	Up
AT2G16750	Protein kinase protein with adenine nucleotide alpha hydrolases-like domain	1.97	4.09	2.23	2.01	0.03	0.51	1.34	0.36	2.3	0.0073	Up
AT5G17160		1.94	3.58	1.11	0.72	0.28	0.37	0.69	0.23	2.3	0.0009	Up
AT1G48100	Pectin lyase-like superfamily protein	1.59	5.77	2.86	1.91	0.78	0.53	1.12	0.24	2.3	0.00042	Up
AT3G25900	Homocysteine S-methyltransferase family protein	1.57	2.44	0.71	0.46	0.14	0.17	0.44	0.38	2.3	0.0047	Up
AT1G17030		1.49	1.57	1.48	0.86	0.14	0.42	0.41	0.17	2.3	4.8e-05	Up
AT3G11520	CYCLIN B1;3	1.47	2.31	0.41	0.66	0.21	0.24	0.41	0.22	2.3	0.0041	Up
AT5G66230	Chalcone-flavanone isomerase family protein	1.47	3.02	0.98	0.65	0.14	0.43	0.54	0.2	2.3	0.0016	Up
AT3G55720	Protein of unknown function (DUF620)	1.24	1.36	0.65	0.48	0	0.25	0.38	0.15	2.3	0.01	Up
AT2G16440	Minichromosome maintenance (MCM2/3/5) family protein	1.17	1.32	0.77	0.22	0.09	0.33	0.14	0.18	2.3	0.0017	Up
AT4G29360	O-Glycosyl hydrolases family 17 protein	1	2.88	1.79	0.93	0.4	0.4	0.25	0.41	2.3	8.4e-05	Up
AT2G01918	PsbQ-like 3	0.95	1.16	0.82	0.6	0.06	0.18	0.19	0.3	2.3	0.001	Up
AT3G45280	syntaxin of plants 72	0.82	1.15	0.5	0.33	0.37	0.03	0.1	0.16	2.3	0.013	Up
AT5G09976		0.78	4.4	4.13	1.65	1.28	0.12	0.66	0.39	2.3	0.024	Up
AT2G24070	Family of unknown function (DUF566)	0.66	1.84	0.53	0.68	0.16	0.39	0.15	0.1	2.3	0.0013	Up
AT1G63650	basic helix-loop-helix (bHLH) DNA-binding superfamily protein	0.65	1.43	1.79	1.15	0.26	0.2	0.48	0.14	2.3	7.1e-05	Up
AT5G19730	Pectin lyase-like superfamily protein	0.52	1.64	0.62	0.68	0.11	0.23	0.28	0.13	2.3	0.0011	Up
AT1G09890	Rhamnogalacturonate lyase family protein	0.5	0.63	0.53	0.29	0.03	0.12	0.07	0.18	2.3	0.0013	Up
AT3G54710	homolog of yeast CDT1 B homolog of yeast CDT1 B	0.44	0.67	0.34	0.25	0.26	0.02	0.05	0.08	2.3	0.02	Up
AT5G09910	Ras-related small GTP-binding family protein	0.23	0.64	0.23	0.51	0.11	0.16	0.03	0.06	2.3	0.025	Up
AT2G23120	Late embryogenesis abundant protein, group 6	366.51	88.25	41.25	24.19	27.02	35.98	26.94	33.13	2.2	0.037	Up
AT1G50010	tubulin alpha-2 chain	220.46	369.26	211.53	138.63	31.95	45.33	90.13	46.65	2.2	2.6e-07	Up
AT1G72610	germin-like protein 1	220.35	502.57	180.31	123.45	55.75	58.29	99.87	31.7	2.2	5e-05	Up
AT1G20850	xylem cysteine peptidase 2	204.57	236.28	167.45	127.83	22.47	42.29	80.07	23.62	2.2	1.8e-06	Up
AT1G43790	tracheary element differentiation-related 6	145.44	138.64	100.31	101.86	9.62	34.78	47.33	16.14	2.2	5.4e-06	Up
AT1G21500		44.68	37.49	17.57	15.5	6.59	9.33	6.57	3.93	2.2	1.4e-06	Up
AT2G32690	glycine-rich protein 23	37.92	127.82	17.73	16.49	8.34	11.67	15.39	11.39	2.2	0.015	Up
AT3G27200	Cupredoxin superfamily protein	35.58	63.75	46.88	32.17	5.43	9.16	20.81	5.77	2.2	1.8e-05	Up
AT4G12880	early nodulin-like protein 19	35.43	119.9	49.06	21.18	11.68	12.39	17.43	11.61	2.2	7e-05	Up
AT1G60810	ATP-citrate lyase A-2	32.08	49.41	30.34	19.18	5.68	7.29	11.99	4.99	2.2	6.8e-08	Up
AT4G14440	3-hydroxyacyl-CoA dehydratase 1	21.95	39.4	22.46	15.15	5.38	7.27	6.9	2.83	2.2	3e-07	Up
AT1G27950	glycosylphosphatidylinositol-anchored lipid protein transfer 1	19.52	37.5	9.63	5.94	3.8	3.3	4.99	4.96	2.2	0.00024	Up
AT2G44940	Integrase-type DNA-binding superfamily protein	18.01	22.54	25.04	15.93	3.29	4.95	6.2	3.71	2.2	4.1e-14	Up
AT2G47360		17.98	33.82	36.76	21.84	1.03	8.21	11.14	4.02	2.2	0.00052	Up
AT1G04220	3-ketoacyl-CoA synthase 2	14.24	32.83	24.35	19.02	3.88	5.5	7.69	3.78	2.2	3.8e-09	Up
AT5G22740	cellulose synthase-like A02	12.74	21.91	12.11	6.89	1.9	3.34	3.92	2.83	2.2	7.1e-08	Up
AT5G39130	RmlC-like cupins superfamily protein	11.32	15.82	9.91	11.01	2.67	2.12	4.37	1.87	2.2	5.5e-09	Up
AT3G44220	Late embryogenesis abundant (LEA) hydroxyproline-rich glycoprotein family	11.02	29.86	18.14	12.83	3.65	3.38	5.7	3.8	2.2	7.6e-08	Up
AT4G16140	proline-rich family protein	10.34	14.86	5.87	4.06	2.19	2.56	2.16	1.32	2.2	5.4e-05	Up
AT3G23730	xyloglucan endotransglucosylase/hydrolase 16	8.56	22.53	3.74	2.1	2.22	1.53	1.96	3.27	2.2	0.0059	Up
AT3G51220	Plant protein of unknown function (DUF827)	7.15	11.05	7.8	5.56	3.23	0.91	3	0.4	2.2	0.0014	Up
AT4G18760	receptor like protein 51	7.15	24.56	5.1	3.23	1.47	2.26	2.85	2.91	2.2	0.0021	Up
AT1G15760	Sterile alpha motif (SAM) domain-containing protein	7.11	12.42	4.49	4.66	2.64	1.54	1.01	1.5	2.2	8.7e-05	Up
AT2G39110	Protein kinase superfamily protein	7.06	9.42	9.68	6.63	1.74	1.36	2.8	1.83	2.2	1e-11	Up
AT1G05810	RAB GTPase homolog A5E	6.54	10.27	4.84	1.91	0.35	1.89	1.23	1.85	2.2	0.0016	Up
AT2G22850	basic leucine-zipper 6	6.5	5.85	3.61	3.04	0.9	0.91	1.39	1.14	2.2	2.2e-08	Up
AT5G41140	Myosin heavy chain-related protein	6.44	11.84	5.28	3.52	0.67	1.77	2.55	1.37	2.2	4.9e-05	Up
AT5G12870	myb domain protein 46	6.29	13.34	7.5	4.52	1.6	1.27	3.23	1.31	2.2	1.4e-05	Up
AT1G71380	cellulase 3	6.17	3.91	4.18	2.64	0.55	0.73	2	0.48	2.2	0.00011	Up
AT1G04778		6.02	11.46	4.04	3.11	2.77	0.54	2.4	0.28	2.2	0.017	Up
AT2G19780	Leucine-rich repeat (LRR) family protein	5.96	5.11	3.98	1.9	0.67	1	1.02	1.21	2.2	1.2e-06	Up
AT3G15520	Cyclophilin-like peptidyl-prolyl cis-trans isomerase family protein	5.68	11.09	4.09	2.91	1.18	1.51	1.67	1.17	2.2	6.8e-06	Up
AT5G25390	Integrase-type DNA-binding superfamily protein	5.59	12.98	7.44	5.1	0.46	1.82	3.73	0.84	2.2	0.0011	Up
AT1G36060	Integrase-type DNA-binding superfamily protein	5.38	1.87	0.62	0.6	0.49	0.51	0.64	0.3	2.2	0.012	Up
AT2G45890	RHO guanyl-nucleotide exchange factor 4	4.86	6.65	4	3.2	1.15	0.73	1.79	0.61	2.2	2.6e-06	Up
AT2G30150	UDP-Glycosyltransferase superfamily protein	4.69	8.81	3.92	3.1	1.21	1.33	1.43	0.94	2.2	5e-06	Up
AT5G66310	ATP binding microtubule motor family protein	4.54	10.5	4.7	3.32	0.72	1.34	2.37	0.96	2.2	3.8e-05	Up
AT5G02750	RING/U-box superfamily protein	4.27	5.91	3.33	3.74	0	1.19	2.61	0.17	2.2	0.044	Up
AT4G10270	Wound-responsive family protein	2.56	2.54	2.03	1.08	1.27	0	0.39	0.38	2.2	0.033	Up
AT5G22940	FRA8 homolog	2.39	7.04	2.95	1.35	0.4	0.81	1.48	0.57	2.2	0.0018	Up
AT2G31010	Protein kinase superfamily protein	2.2	0.91	0.7	0.39	0.19	0.2	0.23	0.36	2.2	0.00064	Up
AT2G12462		2.02	6.11	2.76	1.75	0.17	0.6	1.72	0.46	2.2	0.0094	Up
AT4G36610	alpha/beta-Hydrolases superfamily protein	1.77	5.6	2.24	0.84	0.52	1.1	0.51	0.35	2.2	0.0037	Up
AT5G61280	Remorin family protein	1.66	0.94	0.75	0.95	0	0.27	0.34	0.33	2.2	0.0041	Up
AT5G11620	SWIM zinc finger family protein / mitogen-activated protein kinase kinase kinase (MAPKKK)-related	1.34	2.45	1.87	1.99	0.35	0.67	0.49	0.21	2.2	0.00013	Up
AT3G54180	cyclin-dependent kinase B1;1	1.19	1.74	0.75	0.9	0.31	0.18	0.34	0.26	2.2	0.00042	Up
AT4G01730	DHHC-type zinc finger family protein	1.12	2	0.72	0.42	0.2	0.24	0.18	0.35	2.2	0.0018	Up
AT5G65420	CYCLIN D4;1	1.06	1.44	0.24	0.28	0.04	0.21	0.22	0.24	2.2	0.022	Up
AT5G46280	Minichromosome maintenance (MCM2/3/5) family protein	1.05	1.69	0.58	0.16	0.18	0.41	0.11	0.12	2.2	0.014	Up
AT5G02190	Eukaryotic aspartyl protease family protein	0.94	2.71	0.78	1.07	0.24	0.49	0.07	0.5	2.2	0.0085	Up
AT5G55520		0.9	0.94	0.5	0.26	0.13	0.07	0.33	0.08	2.2	0.0085	Up
AT1G75030	thaumatin-like protein 3	0.85	4.26	1.58	0.64	0.9	0.06	0.43	0.42	2.2	0.039	Up
AT3G01710	TPX2 (targeting protein for Xklp2) protein family	0.75	1.52	0.56	0.5	0.14	0.21	0.17	0.25	2.2	0.0018	Up
AT3G27070	translocase outer membrane 20-1	0.62	1.01	1	0.73	0.17	0.3	0.21	0.07	2.2	0.001	Up
AT5G42930	alpha/beta-Hydrolases superfamily protein	0.6	0.76	0.5	0.46	0	0.05	0.27	0.2	2.2	0.012	Up
AT3G05740	RECQ helicase l1	0.5	0.98	0.19	0.2	0.06	0.07	0.22	0.06	2.2	0.023	Up
AT4G31890	ARM repeat superfamily protein	0.4	0.53	0.11	0.26	0	0.05	0.17	0.06	2.2	0.039	Up
AT4G38070	basic helix-loop-helix (bHLH) DNA-binding superfamily protein	0.29	0.43	0.19	0.14	0	0.07	0.08	0.08	2.2	0.0082	Up
AT5G67210	Protein of unknown function (DUF579)	189.46	275.14	228.04	175.35	24.05	41.06	113.78	35.76	2.1	2.8e-05	Up
AT3G51600	lipid transfer protein 5	183.07	252.24	137.23	79.21	39.82	29.71	69.17	25.03	2.1	9.3e-06	Up
AT2G40320	TRICHOME BIREFRINGENCE-LIKE 33	87.87	149.75	115.45	84.06	12.43	22.8	54.92	13.79	2.1	3.5e-05	Up
AT2G02130	low-molecular-weight cysteine-rich 68	81.91	150.03	77.49	47.46	19.77	25.46	23.82	18.52	2.1	5e-08	Up
AT1G63910	myb domain protein 103	74.53	118.34	105.65	75.79	9.85	18.7	45.47	15.03	2.1	1.1e-05	Up
AT1G16510	SAUR-like auxin-responsive protein family	47.85	49.84	36.2	36.91	6.69	8.75	20.27	7.38	2.1	7.3e-07	Up
AT1G29910	chlorophyll A/B binding protein 3	46.47	103.62	15.3	17.2	14.69	15.59	9.72	6.19	2.1	0.002	Up
AT4G08685	Pollen Ole e 1 allergen and extensin family protein	46.17	108.42	35.75	23.55	11.21	13.39	17.91	10.06	2.1	4.2e-05	Up
AT1G29890	O-acetyltransferase family protein	37.93	49.23	37.27	30.69	5.37	8.5	17.65	7.4	2.1	3e-07	Up
AT1G79180	myb domain protein 63	36.38	44.74	27.5	27.22	6.23	7.31	14.31	5.29	2.1	6.6e-08	Up
AT3G10080	RmlC-like cupins superfamily protein	32.09	32.8	18.36	12.86	4.46	5.85	9.61	3.63	2.1	7.1e-06	Up
AT2G32510	mitogen-activated protein kinase kinase kinase 17	24.37	23.15	20.49	13.08	1.89	3.83	5.12	9.5	2.1	3.9e-05	Up
AT4G08870	Arginase/deacetylase superfamily protein	21.72	4.4	25.42	3.89	4.57	2.72	1.08	5.52	2.1	0.036	Up
AT4G01680	myb domain protein 55	17.88	25.27	11.75	11.05	2.55	5.77	3.91	4.08	2.1	1.8e-07	Up
AT1G23460	Pectin lyase-like superfamily protein	17.24	19.52	11.18	12.87	1.92	4.47	5.62	2.5	2.1	1.5e-07	Up
AT2G33570	Domain of unknown function (DUF23)	16.08	32.63	14.98	7.34	1.78	5.49	5.95	4.76	2.1	0.00022	Up
AT1G41830	SKU5-similar 6	15.71	36.77	11.35	7.35	3.77	3.7	6.28	4.62	2.1	0.00011	Up
AT5G42720	Glycosyl hydrolase family 17 protein	13.49	14.55	10.85	8.95	1.97	2.8	4.49	2.56	2.1	3.3e-10	Up
AT3G17120		11.1	12.69	11.51	4.13	1.43	1.74	1.24	5.26	2.1	0.00043	Up
AT5G67620		11.04	14.42	9.2	7.57	1.8	2.87	3.31	2.03	2.1	1.7e-09	Up
AT1G32170	xyloglucan endotransglucosylase/hydrolase 30	10.92	17.05	3.72	2.6	2.28	1.26	2.12	2.89	2.1	0.0013	Up
AT2G35190	novel plant snare 11	10.6	17.99	9.59	5.89	1.27	2.16	4.02	3.18	2.1	1.4e-05	Up
ATCG00600	PETG	10.17	8.14	16.24	7.35	4.41	1.03	3.24	2.13	2.1	0.0063	Up
AT5G16410	HXXXD-type acyl-transferase family protein	10.16	6.03	3.44	3.83	1.76	1.64	1.36	0.99	2.1	4.7e-06	Up
AT3G52840	beta-galactosidase 2	9.29	7.43	5.86	3.77	1.45	1.61	2.33	1.22	2.1	1.7e-08	Up
AT4G37750	Integrase-type DNA-binding superfamily protein	8.51	11.61	8	5.81	1.29	2.44	3.13	1.3	2.1	1.7e-07	Up
AT3G56370	Leucine-rich repeat protein kinase family protein	8.28	16.69	7.47	4.55	1.58	2.55	2.62	2.16	2.1	1.9e-06	Up
AT1G29660	GDSL-like Lipase/Acylhydrolase superfamily protein	8.26	36.61	4.98	4.78	3.65	3.8	3.45	3.09	2.1	0.0039	Up
AT3G56230	BTB/POZ domain-containing protein	7.34	10.55	6.16	4.98	0.74	1.26	2.98	2.33	2.1	6.2e-05	Up
AT1G08560	syntaxin of plants 111	7.24	9.92	4.13	2.37	0.79	1.56	2.21	1.09	2.1	0.00038	Up
AT3G22790	Kinase interacting (KIP1-like) family protein	6.74	8.38	7.18	6.47	0.56	2.04	3.44	1.13	2.1	6.7e-05	Up
AT5G65640	beta HLH protein 93	6.55	4.36	3.69	3.75	0.59	1.59	1.4	0.87	2.1	2.7e-07	Up
AT1G73140	Plant protein of unknown function (DUF828)	6.44	12.27	9.04	5.96	1.13	1.81	3.94	1.44	2.1	3.1e-05	Up
AT4G36240	GATA transcription factor 7	6.12	12.38	8.77	4.15	1.57	3.37	1.62	1.36	2.1	7.8e-05	Up
AT1G01250	Integrase-type DNA-binding superfamily protein	6.03	32.54	11.86	8.75	1.32	3.56	6.01	3.98	2.1	0.003	Up
AT1G23340	Protein of Unknown Function (DUF239)	5.64	5.82	3.7	2.57	1.26	0.74	1.91	0.51	2.1	5.2e-05	Up
AT3G29630	UDP-Glycosyltransferase superfamily protein	5.36	8.17	5.46	5.14	0.89	1.37	2.65	1	2.1	3e-06	Up
AT1G14190	Glucose-methanol-choline (GMC) oxidoreductase family protein	5.23	7.68	5.39	3.73	0.47	1.4	3.03	0.56	2.1	0.0018	Up
AT1G14630		5.16	5.82	2.28	3.46	1.08	1.3	0.97	0.92	2.1	1.7e-06	Up
AT1G73370	sucrose synthase 6	5	7.03	4.19	2.87	0.67	1.45	1.43	1.19	2.1	2.3e-07	Up
AT1G11190	bifunctional nuclease i	3.06	2.73	2.34	1.73	0.04	0.97	0.77	0.51	2.1	0.0015	Up
AT5G15600	SPIRAL1-like4	2.6	2.8	1.38	1.01	1.01	0.46	0.21	0.41	2.1	0.0062	Up
AT5G37660	plasmodesmata-located protein 7	2.54	4.33	1.96	2.33	0.34	0.46	1.03	0.81	2.1	4.6e-05	Up
AT2G34650	Protein kinase superfamily protein	2.31	5.49	1.43	1.11	0.74	0.69	0.39	0.75	2.1	0.0015	Up
AT5G40380	cysteine-rich RLK (RECEPTOR-like protein kinase) 42	2.26	1.28	0.96	0.55	0.12	0.36	0.47	0.25	2.1	0.0012	Up
AT2G26760	Cyclin B1;4	2.12	4.28	0.92	0.34	0.19	0.34	0.79	0.55	2.1	0.022	Up
AT4G38950	ATP binding microtubule motor family protein	2.11	2.23	1.59	1.06	0.53	0.22	0.73	0.24	2.1	4.7e-05	Up
AT3G17130	Plant invertase/pectin methylesterase inhibitor superfamily protein	2.1	2.72	0.96	1.99	0.18	0.53	0.56	0.55	2.1	0.0069	Up
AT5G57810	tetraspanin15	2.08	3.42	1.6	2.11	0	0.81	0.76	0.57	2.1	0.0032	Up
AT1G09155	phloem protein 2-B15	2.04	1.79	1.88	1.91	0.38	0.4	0.7	0.37	2.1	5.4e-06	Up
AT5G16350	O-acyltransferase (WSD1-like) family protein	1.75	3.04	2.2	0.69	0.62	0.29	0.68	0.27	2.1	0.0008	Up
AT1G10560	plant U-box 18	1.64	3.77	1.18	1.51	0.51	0.27	0.8	0.41	2.1	0.00049	Up
AT5G06905	cytochrome P450, family 712, subfamily A, polypeptide 2	1.64	2.57	2.42	2.63	0	0.93	1.01	0.22	2.1	0.014	Up
AT5G67270	end binding protein 1C	1.58	1.56	1.23	0.71	0.1	0.44	0.61	0.06	2.1	0.01	Up
AT1G56670	GDSL-like Lipase/Acylhydrolase superfamily protein	1.39	2.97	1.41	1.17	0.85	0.3	0.26	0.43	2.1	0.00057	Up
AT5G11510	myb domain protein 3r-4	1.38	2.07	0.89	0.55	0.34	0.27	0.41	0.22	2.1	0.00017	Up
AT5G51560	Leucine-rich repeat protein kinase family protein	1.29	2.99	0.86	0.87	0.35	0.2	0.66	0.27	2.1	0.0018	Up
AT4G02800		1.02	3.17	1	0.77	0.42	0.42	0.48	0.22	2.1	0.0053	Up
AT2G17780	PLAC8 family protein	0.97	1.1	0.28	0.31	0.28	0.12	0.12	0.14	2.1	0.0092	Up
AT1G16630		0.82	0.62	0.42	0.47	0	0.21	0.29	0.04	2.1	0.024	Up
AT5G02140	Pathogenesis-related thaumatin superfamily protein	0.81	0.95	0.92	0.43	0.29	0.28	0.06	0.17	2.1	0.02	Up
AT5G55830	Concanavalin A-like lectin protein kinase family protein	0.72	0.75	0.64	0.35	0.09	0.32	0.03	0.14	2.1	0.012	Up
AT5G26190	Cysteine/Histidine-rich C1 domain family protein	0.66	0.6	0.84	0.62	0	0.46	0.04	0.15	2.1	0.045	Up
AT3G57860	UV-B-insensitive 4-like	0.6	0.66	0.45	0.33	0	0.15	0.13	0.19	2.1	0.012	Up
AT1G51640	exocyst subunit exo70 family protein G2	0.58	1.02	0.38	0.52	0.29	0.06	0.15	0.17	2.1	0.0082	Up
AT5G07660	structural maintenance of chromosomes 6A	0.29	0.28	0.29	0.06	0.06	0.04	0.06	0.07	2.1	0.0059	Up
AT5G02160		170.88	215.04	95.41	80.68	38.75	45.48	42.51	24.98	2	4.4e-07	Up
AT2G05100	photosystem II light harvesting complex gene 2.1	119.79	123.6	51.15	46.22	20.02	28.5	25.08	16.85	2	1.6e-06	Up
AT3G54040	PAR1 protein	89.63	101.24	86.54	80.8	11.04	22.25	43.8	18.69	2	1.9e-06	Up
AT3G20470	glycine-rich protein 5	70.28	49.66	9.27	8.75	7.01	12.72	10.3	6.16	2	0.0067	Up
AT3G55990	Plant protein of unknown function (DUF828)	68.36	124.23	93.42	62.68	13.06	18.33	45.63	16.08	2	2.5e-05	Up
AT1G19940	glycosyl hydrolase 9B5	40.92	83.28	57.77	41.85	5.52	12.39	30.44	10.61	2	0.00024	Up
AT4G19120	S-adenosyl-L-methionine-dependent methyltransferases superfamily protein	40.64	41.55	16.79	11.75	5.57	7.49	6.59	8.91	2	9.3e-06	Up
ATCG00070	photosystem II reaction center protein K precursor	36.4	51.03	60.67	24.27	14.06	7.26	7.95	16.32	2	1.9e-05	Up
AT1G76160	SKU5 similar 5	35.09	40.67	17.35	10.12	4.29	5.57	5.67	11.99	2	0.00021	Up
AT1G14890	Plant invertase/pectin methylesterase inhibitor superfamily protein	30.95	19.66	11.58	13.25	2.98	6.03	8.81	2.44	2	0.00029	Up
AT1G26820	ribonuclease 3	26.7	23.88	16.92	19.41	4.06	8.11	6.67	3.76	2	9.7e-10	Up
AT5G60660	plasma membrane intrinsic protein 2;4	22.2	25.42	19.38	17.59	2.56	5.24	10.12	3.68	2	5.1e-06	Up
AT3G56480	myosin heavy chain-related	19.21	43.18	13.07	11.99	4.92	5.86	7.34	4.62	2	1.8e-05	Up
AT3G12110	actin-11	19.05	43.16	15.37	10.19	4.01	5.97	7.56	5.53	2	5.8e-05	Up
AT2G29980	fatty acid desaturase 3	18.53	39.9	19.32	16.37	4.36	7.13	8.64	5.17	2	7.2e-07	Up
AT1G58070		18.49	12.19	10.77	12.01	2.49	4.66	4.94	2.28	2	1.1e-07	Up
AT3G62730		17.91	16.5	13.62	12.4	3.17	4.93	5.59	2.59	2	7.6e-10	Up
AT5G62070	IQ-domain 23	13.15	13.99	6.5	3.64	3.52	1.74	1.69	2.83	2	8.7e-05	Up
AT3G56130	biotin/lipoyl attachment domain-containing protein	13.07	16.52	9.01	6.99	2.19	3.7	3.91	2.51	2	2.3e-07	Up
AT5G40980	Protein of unknown function (DUF 3339)	12.27	15.5	7.8	5.71	2.43	2.2	4.46	2.12	2	0.00045	Up
AT3G62630	Protein of unknown function (DUF1645)	12.25	11.28	2.31	4.14	2.29	1.46	1.87	2.39	2	0.00098	Up
AT3G14170	Plant protein of unknown function (DUF936)	11.54	10.56	9.16	6.49	1.03	2.72	4.34	1.86	2	2e-05	Up
AT3G54880		10.65	12.93	7.3	4.95	2.47	3.34	2.22	1.42	2	3.7e-06	Up
AT2G40370	laccase 5	10.27	19.41	12.32	8.88	2.72	3.15	5.7	2.06	2	4.5e-06	Up
AT1G33260	Protein kinase superfamily protein	9.8	12.84	9.11	8.7	2.21	2.04	2.9	3.45	2	1.5e-12	Up
AT2G28140	Protein of unknown function (DUF1635)	9.59	8.47	5.87	3.92	1.16	2.83	1.43	1.82	2	1.9e-05	Up
ATCG00570	photosystem II reaction center protein F	8.64	28.55	20.57	10.75	9.22	3.91	3.08	2.53	2	0.0072	Up
AT2G28500	LOB domain-containing protein 11	7.52	10.93	4.31	3.97	1.47	1.71	2.19	1.5	2	7.1e-06	Up
AT1G18250	Pathogenesis-related thaumatin superfamily protein	6.98	9.84	4.14	2.6	1.03	1.51	2.62	1.07	2	0.00065	Up
AT3G28917	mini zinc finger 2	6.88	28.58	8.77	3.99	1.71	2.85	6.58	2.14	2	0.013	Up
AT1G30570	hercules receptor kinase 2	6.65	10.05	5.19	3.97	1.54	1.5	1.57	2.36	2	5.4e-07	Up
AT5G04330	Cytochrome P450 superfamily protein	6.17	8.23	2.49	2.53	1.09	1.66	1.27	1.22	2	0.0002	Up
AT3G26700	Protein kinase superfamily protein	5.84	10.25	6.11	4.32	0.89	1.82	2.74	1.72	2	1.3e-05	Up
AT2G41690	heat shock transcription factor B3	5.78	2	0.82	1.89	0	1.24	0.79	0.57	2	0.045	Up
AT1G77870	membrane-anchored ubiquitin-fold protein 5 precursor	4.96	10.46	4.67	3.02	0	3.25	1.29	1.35	2	0.03	Up
AT5G10605	methyltransferases	4.93	2.6	2.32	2.87	0.81	0.71	0.75	0.98	2	0.00095	Up
AT4G15430	ERD (early-responsive to dehydration stress) family protein	4.57	7.28	4.2	3.8	0.58	1.13	2.56	0.82	2	0.00012	Up
AT3G08490		4.36	6.79	2.22	2.23	0.47	0.78	2.37	0.38	2	0.0098	Up
AT5G22240	Ovate family protein	4.33	4.23	4.03	2.62	0	1.79	1.25	0.82	2	0.0066	Up
AT1G62870		4.19	10.1	8.63	5.87	1.87	1.56	2.87	1.3	2	1.4e-06	Up
AT1G35910	Haloacid dehalogenase-like hydrolase (HAD) superfamily protein	4.09	7.35	5.1	4.04	1.32	1.31	1.62	1.06	2	3.6e-09	Up
AT1G64690	branchless trichome	3.95	7.61	3.39	2.14	0.88	1.33	1.51	0.69	2	0.00044	Up
AT1G68470	Exostosin family protein	3.83	6.41	3.17	2.89	0	0.96	1.92	1.41	2	0.026	Up
AT2G16630	Pollen Ole e 1 allergen and extensin family protein	3.63	10.63	2.65	1.97	1.85	1.47	1.03	0.64	2	0.003	Up
AT4G27595	Plant protein of unknown function (DUF827)	3.61	6.8	3.17	2.47	0.58	1.21	1.53	0.92	2	2e-05	Up
AT3G18050		3.51	6.01	2.21	1.74	0.35	0.73	1.54	0.91	2	0.0016	Up
AT3G51080	GATA transcription factor 6	3.3	7.22	4.93	2.73	0.66	1.71	1.8	0.61	2	0.00045	Up
AT4G32280	indole-3-acetic acid inducible 29	2.6	1.91	1.79	1.68	0	0.72	1.07	0.26	2	0.018	Up
AT2G25820	Integrase-type DNA-binding superfamily protein	2.28	1.65	5.32	1.56	0.66	0.45	0.54	1.13	2	0.0038	Up
AT1G29860	WRKY DNA-binding protein 71	2.25	2.35	0.2	0.69	0.31	0.45	0.28	0.47	2	0.038	Up
AT1G18620		2.2	5.97	1.01	0.78	0.38	0.73	0.92	0.67	2	0.0082	Up
AT2G43040	tetratricopeptide repeat (TPR)-containing protein	2.2	3.23	2.3	1.61	0.35	0.52	0.99	0.66	2	9.1e-06	Up
AT2G01818	PLATZ transcription factor family protein	2.07	1.97	0.85	0.59	0.34	0.34	0.27	0.53	2	0.0026	Up
AT3G05980		1.86	2.54	1.92	1.07	0.35	0.41	0.59	0.63	2	0.00069	Up
AT5G45700	Haloacid dehalogenase-like hydrolase (HAD) superfamily protein	1.73	3.53	1.56	0.84	0	0.55	0.8	0.57	2	0.027	Up
AT1G63520	Protein of unknown function (DUF3527)	1.57	2.62	1.09	1.31	0.45	0.39	0.74	0.13	2	0.0013	Up
AT1G02460	Pectin lyase-like superfamily protein	1.54	3.97	3.9	4.25	0.44	0.76	1.73	0.7	2	0.00045	Up
AT5G48690		1.5	1.4	1.34	1.2	0.15	0.49	0.39	0.36	2	1.2e-05	Up
AT1G04760	vesicle-associated membrane protein 726	1.35	3.65	2.56	0.59	0.46	0.36	0.75	0.56	2	0.0078	Up
AT2G46570	laccase 6	1.33	2.6	1.44	1.35	0.73	0.35	0.5	0.3	2	0.00012	Up
AT5G40630	Ubiquitin-like superfamily protein	1.28	6.38	2.38	1.94	0.6	1.28	0.37	0.87	2	0.006	Up
AT2G25220	Protein kinase superfamily protein	1.16	3.62	1.53	0.4	0.1	0.49	0.75	0.48	2	0.023	Up
AT1G44110	Cyclin A1;1	1.02	2.4	1.33	0.3	0.51	0.32	0.26	0.25	2	0.0077	Up
AT2G36200	P-loop containing nucleoside triphosphate hydrolases superfamily protein	0.95	1.44	0.63	0.32	0.24	0.17	0.25	0.26	2	0.00096	Up
AT1G20610	Cyclin B2;3	0.84	1.1	0.38	0.28	0.3	0.06	0.25	0.12	2	0.019	Up
AT1G71930	vascular related NAC-domain protein 7	0.74	1.1	0.29	0.71	0.17	0.32	0.2	0.03	2	0.02	Up
AT5G18090	AP2/B3-like transcriptional factor family protein	0.71	1.07	1.32	0.61	0	0.36	0.38	0.2	2	0.012	Up
AT1G65710		0.63	1.26	0.81	0.47	0.18	0.32	0.3	0.04	2	0.019	Up
AT5G27000	kinesin 4	0.52	0.49	0.23	0.38	0.02	0.15	0.18	0.06	2	0.0063	Up
AT3G10310	P-loop nucleoside triphosphate hydrolases superfamily protein with CH (Calponin Homology) domain	0.35	0.61	0.33	0.17	0	0.19	0.14	0.05	2	0.034	Up
AT4G14770	TESMIN/TSO1-like CXC 2	0.35	1.71	0.41	0.32	0.17	0.24	0.21	0.11	2	0.017	Up
AT3G23810	S-adenosyl-l-homocysteine (SAH) hydrolase 2	961.2	1337.28	1075.43	960.76	123.65	288.15	566.32	218.62	1.9	2.3e-05	Up
AT3G03780	methionine synthase 2	582.74	708.87	692.56	624.18	76.79	165.84	357.35	140.64	1.9	2.7e-05	Up
AT5G60490	FASCICLIN-like arabinogalactan-protein 12	545.31	943.3	685.83	492.9	97.81	154.14	353.56	138.32	1.9	2.4e-05	Up
AT2G14890	arabinogalactan protein 9	215.26	511.09	260.89	208.05	63.19	71.6	134.71	70.31	1.9	5.7e-06	Up
AT1G01620	plasma membrane intrinsic protein 1C	185.05	289.44	101.84	94.22	46.92	46.06	62.03	37.15	1.9	7.2e-06	Up
AT3G15050	IQ-domain 10	175.16	269.51	238.75	201.59	26.22	53.36	127.93	39.57	1.9	0.00012	Up
AT2G03200	Eukaryotic aspartyl protease family protein	111.98	182.41	150.87	99.55	20.69	34.25	71.68	31.07	1.9	1.8e-05	Up
AT3G18660	plant glycogenin-like starch initiation protein 1	108.47	124.01	109.53	88.08	12.25	26.41	59.55	19.25	1.9	5.8e-05	Up
AT3G21550	DUF679 domain membrane protein 2	80.17	86.24	59.83	55.74	8.86	23.54	32.91	13.88	1.9	1.2e-05	Up
AT1G70370	polygalacturonase 2	65.23	83.61	38.92	17.23	14.12	12.89	14.83	16.8	1.9	6.2e-05	Up
AT1G02335	germin-like protein subfamily 2 member 2 precursor	65.1	70.43	59.33	50.51	11.75	17.38	28.54	12.94	1.9	2.8e-08	Up
AT3G60890	protein binding	59.25	87	65.93	52.51	19.58	17.26	23.16	13.7	1.9	5.3e-12	Up
AT1G56720	Protein kinase superfamily protein	58.91	82.07	72.89	65.44	10.57	17.45	39.92	12.25	1.9	3.5e-05	Up
AT5G40020	Pathogenesis-related thaumatin superfamily protein	56.75	51.11	44.53	35.01	8.55	12.75	22.99	8.97	1.9	8.4e-07	Up
AT3G62690	AtL5	51.67	48.49	53.46	72.93	17.83	17.72	19.1	9.37	1.9	6.7e-13	Up
AT5G49460	ATP citrate lyase subunit B 2	36.55	65.96	36.28	24.85	7.5	9.82	18.01	10.21	1.9	3.6e-06	Up
AT4G40060	homeobox protein 16	31.98	27.29	14.2	15.47	7.69	6.46	6.64	3.8	1.9	2.8e-07	Up
AT4G16447		28.02	19.41	21.79	15.94	9.18	5.55	6.54	3.83	1.9	7.6e-08	Up
AT3G49220	Plant invertase/pectin methylesterase inhibitor superfamily	25.2	84.47	24.99	16.57	10.57	9.24	13.2	11.82	1.9	0.00061	Up
AT3G06420	Ubiquitin-like superfamily protein	19.63	20.88	16.47	13.83	3.21	5.46	7.52	3.45	1.9	5e-08	Up
AT1G20010	tubulin beta-5 chain	18.84	39.86	16.03	11.84	5.81	5.58	7.44	5.16	1.9	5.4e-06	Up
AT5G16250		18.79	32.64	11.01	6.85	3.99	4.04	6.97	5.17	1.9	0.00085	Up
AT3G03190	glutathione S-transferase F11	17.41	18.07	31.96	15.65	4.19	8.68	2.69	7.65	1.9	2.3e-05	Up
AT5G58000	Reticulon family protein	16.48	34.09	15.63	11.41	3.54	4.75	9.48	3.86	1.9	0.00011	Up
AT5G55180	O-Glycosyl hydrolases family 17 protein	16.22	20.53	6.66	4.27	0.47	4.28	5.32	3.36	1.9	0.015	Up
AT4G33330	plant glycogenin-like starch initiation protein 3	15.96	25.54	22.38	18.94	2.06	5.25	10.64	4.82	1.9	5.8e-05	Up
AT5G16490	ROP-interactive CRIB motif-containing protein 4	11.27	19.63	9.21	8.02	3.65	3.42	5.08	1.54	1.9	0.00014	Up
AT1G14390	Leucine-rich repeat protein kinase family protein	9.62	9.86	8.47	6.12	2.04	2.59	2.54	2.24	1.9	1.6e-14	Up
AT2G20650	RING/U-box superfamily protein	9.52	12.93	10.74	9.07	1.44	3.36	4.86	2.21	1.9	1.9e-06	Up
AT5G48460	Actin binding Calponin homology (CH) domain-containing protein	9.11	18.68	7.03	6.19	2.55	3.29	3.29	2.42	1.9	6.9e-06	Up
AT1G24070	cellulose synthase-like A10	8.7	11.16	10.69	6.92	2.68	3.41	2.41	2.21	1.9	2.4e-13	Up
AT3G25730	ethylene response DNA binding factor 3	8.04	1.61	1.66	1.8	1.29	0.8	0.79	0.96	1.9	0.011	Up
AT1G29980	Protein of unknown function, DUF642	7.84	6.66	4.13	2.11	0.81	0.95	1.34	2.82	1.9	0.0015	Up
AT4G23500	Pectin lyase-like superfamily protein	7.42	14.37	7.81	6.61	3.24	2.16	2.88	2.28	1.9	1.3e-07	Up
AT4G27730	oligopeptide transporter 1	6.98	3.35	1.75	1.65	0.98	0.99	0.98	0.96	1.9	0.00065	Up
AT4G22730	Leucine-rich repeat protein kinase family protein	6.97	8.26	5.79	4.14	1.13	1.51	2.44	2.14	1.9	5.2e-07	Up
AT1G18835	mini zinc finger	6.53	31.75	11.8	12.3	2.69	5.3	7.21	2.84	1.9	0.0073	Up
AT1G69325	Remorin family protein	6.31	9.12	3.98	2.42	2.08	1.21	2.43	0.57	1.9	0.0084	Up
AT2G45900	Phosphatidylinositol N-acetyglucosaminlytransferase subunit P-related	6.25	12.63	9.03	6.16	1.74	2.25	3.71	1.63	1.9	2.7e-06	Up
AT5G55950	Nucleotide/sugar transporter family protein	5.88	10.2	8.73	6.14	1.17	2.32	3.21	1.67	1.9	9.2e-07	Up
AT4G27970	SLAC1 homologue 2	5.16	1.05	1.34	1.22	0.49	0.38	0.27	1.32	1.9	0.024	Up
AT3G28130	nodulin MtN21 /EamA-like transporter family protein	4.58	6.18	3.06	2.09	1.04	1.31	1.27	0.86	1.9	8.6e-06	Up
AT5G62550		3.93	5.59	2.71	1.17	0.97	1.33	1.14	0.31	1.9	0.0036	Up
AT4G00820	IQ-domain 17	3.58	8.29	5.36	3.18	0.7	1.69	2.05	1.12	1.9	9.7e-05	Up
AT1G47271	Cystathionine beta-synthase (CBS) family protein	3.39	3.82	2.76	1.81	0.26	1.03	1.37	0.67	1.9	0.00096	Up
AT1G22340	UDP-glucosyl transferase 85A7	3.22	0.61	1.3	0.87	0.25	0.9	0.11	0.45	1.9	0.04	Up
AT4G10630	Glutaredoxin family protein	2.91	4.76	3.33	2.18	0.1	1.17	1.59	0.85	1.9	0.007	Up
AT5G62210	Embryo-specific protein 3, (ATS3)	2.83	11.78	4.85	5.16	0.95	1.01	3.76	1.25	1.9	0.0077	Up
AT4G30680	Initiation factor eIF-4 gamma, MA3	2.8	0.87	1.56	0.95	0.37	0.61	0.11	0.63	1.9	0.011	Up
AT1G59850	ARM repeat superfamily protein	2.76	2.52	1.61	1.86	0.83	0.41	0.72	0.57	1.9	1.2e-05	Up
AT1G78170		2.71	9.3	2.38	1.87	0.19	2.15	1.13	1	1.9	0.026	Up
AT3G47180	RING/U-box superfamily protein	2.53	3.43	3.06	1.9	0	0.63	1.65	0.73	1.9	0.022	Up
AT1G17140	interactor of constitutive active rops 1	2.5	13.75	3.21	0.91	1.63	1.36	1.49	1.32	1.9	0.021	Up
AT2G37925	copper transporter 4	2.3	4.18	1.29	1.62	0	0.61	1.29	0.64	1.9	0.049	Up
AT3G60490	Integrase-type DNA-binding superfamily protein	2.24	1.86	3.23	2.14	0.36	0.97	0.22	1.08	1.9	0.0043	Up
AT1G06420		2.08	2.99	1.81	1.07	0.69	1.03	0.3	0.3	1.9	0.008	Up
AT1G62770	Plant invertase/pectin methylesterase inhibitor superfamily protein	2	7.46	1.23	1.16	0.7	1.69	0.43	0.6	1.9	0.041	Up
AT5G59360		1.97	3.02	2.35	2.32	0.19	1.24	0.91	0.39	1.9	0.0032	Up
AT4G03100	Rho GTPase activating protein with PAK-box/P21-Rho-binding domain	1.69	2.49	1.27	0.36	0	0.48	0.6	0.5	1.9	0.049	Up
AT1G10750	Protein of Unknown Function (DUF239)	1.53	1.58	0.82	0.79	0.27	0.27	0.49	0.33	1.9	0.00012	Up
AT3G20260	Protein of unknown function (DUF1666)	1.29	2.8	1.44	0.63	0.29	0.53	0.6	0.27	1.9	0.0029	Up
AT4G14310	Transducin/WD40 repeat-like superfamily protein	1.25	2.46	1.04	0.38	0.42	0.33	0.38	0.39	1.9	0.0046	Up
ATCG01110	NAD(P)H dehydrogenase subunit H	1.14	3.02	1.94	1.15	0.6	0.69	0.1	0.72	1.9	0.014	Up
AT5G33300	chromosome-associated kinesin-related	1.08	1.95	0.45	0.43	0.27	0.32	0.33	0.2	1.9	0.0076	Up
AT5G20710	beta-galactosidase 7	0.9	0.88	0.9	0.83	0.16	0.16	0.23	0.42	1.9	4.2e-05	Up
AT1G04520	plasmodesmata-located protein 2	0.87	2.18	0.47	0.37	0.33	0.24	0.35	0.2	1.9	0.019	Up
AT4G21270	kinesin 1	0.82	1.12	0.42	0.27	0.17	0.15	0.3	0.11	1.9	0.0049	Up
AT1G15570	CYCLIN A2;3	0.81	1.23	0.4	0.47	0.26	0.27	0.28	0.02	1.9	0.022	Up
AT2G23170	Auxin-responsive GH3 family protein	0.81	0.26	0.52	0.14	0.07	0.11	0.11	0.18	1.9	0.033	Up
AT5G15530	biotin carboxyl carrier protein 2	0.79	4.47	1.81	0.86	0.43	0.56	0.71	0.55	1.9	0.01	Up
AT5G41070	dsRNA-binding protein 5	0.77	0.78	0.51	0.22	0.23	0.13	0.14	0.17	1.9	0.025	Up
AT5G37980	Zinc-binding dehydrogenase family protein	0.71	7.07	3.06	1.31	0.52	0.85	1.32	0.74	1.9	0.022	Up
AT5G52790	CBS domain-containing protein with a domain of unknown function (DUF21)	0.62	0.73	0.73	0.59	0	0.31	0.21	0.18	1.9	0.0051	Up
AT3G23670	phragmoplast-associated kinesin-related protein, putative	0.52	0.7	0.37	0.25	0.05	0.13	0.18	0.13	1.9	0.0014	Up
AT4G22860	Cell cycle regulated microtubule associated protein	0.46	0.59	0.21	0.24	0.07	0.06	0.07	0.21	1.9	0.017	Up
AT3G18070	beta glucosidase 43	0.41	0.65	0.3	0.27	0	0.22	0.12	0.09	1.9	0.036	Up
AT5G49330	myb domain protein 111	0.33	2.18	1.82	1.57	0.21	0.6	0.43	0.45	1.9	0.01	Up
AT3G57130	Ankyrin repeat family protein / BTB/POZ domain-containing protein	0.12	0.32	0.36	0.37	0.04	0.12	0.07	0.07	1.9	0.039	Up
AT4G13930	serine hydroxymethyltransferase 4	452.71	716.02	604.29	506.37	93.8	160.74	311.86	131.11	1.8	1.1e-05	Up
AT2G29130	laccase 2	111.67	144.63	179.7	124.34	19.21	34.46	99.53	15.17	1.8	0.022	Up
AT3G23050	indole-3-acetic acid 7	83.8	241.27	139.71	77.76	34.26	41.34	66	20.76	1.8	0.00029	Up
AT1G49750	Leucine-rich repeat (LRR) family protein	71.19	123.61	53.76	27.58	29.75	11.97	22.26	23.6	1.8	0.00054	Up
AT3G06035	Glycoprotein membrane precursor GPI-anchored	59.09	112.29	81.07	52.44	17.19	20.2	34.59	20.97	1.8	9.1e-07	Up
AT2G39010	plasma membrane intrinsic protein 2E	38.92	47.4	15.1	8.7	9.56	5.67	10.35	7.67	1.8	0.0013	Up
AT2G45470	FASCICLIN-like arabinogalactan protein 8	35.47	90.71	28.32	22.69	11.84	14	15.35	12.98	1.8	0.00019	Up
AT3G50630	KIP-related protein 2	30.85	50.16	25.91	29.68	10.41	11.07	13.51	6.08	1.8	2.4e-07	Up
AT2G36570	Leucine-rich repeat protein kinase family protein	28.69	66.79	30.74	17.95	8.19	12.45	16.46	8.56	1.8	0.00027	Up
AT3G22740	homocysteine S-methyltransferase 3	21.01	3.6	12.62	4.86	2.96	3.83	0.93	5.22	1.8	0.013	Up
AT2G40480	Plant protein of unknown function (DUF827)	20.17	34	17.92	15.05	6.45	6.13	8.76	4.88	1.8	3e-07	Up
AT1G58370	glycosyl hydrolase family 10 protein / carbohydrate-binding domain-containing protein	19.94	20.77	19.39	17.12	3.07	5.43	9.97	4.03	1.8	1.7e-06	Up
AT1G09200	Histone superfamily protein	18.89	46.8	15.54	7.76	2.49	6.96	9.54	7.3	1.8	0.0067	Up
AT5G40890	chloride channel A	18.77	6.68	2.91	2.51	2.29	2.05	2.94	2.11	1.8	0.0074	Up
AT4G26540	Leucine-rich repeat receptor-like protein kinase family protein	18.7	25.78	17.16	16	3.47	4.97	12.11	3.67	1.8	0.00019	Up
AT5G37478	TPX2 (targeting protein for Xklp2) protein family	18.68	39.97	30.66	18.63	7.2	5.92	14.04	5.45	1.8	3.8e-05	Up
AT1G77690	like AUX1 3	17.28	39.01	17.41	11.56	4.82	7.33	9.01	4.61	1.8	0.0001	Up
AT5G01840	ovate family protein 1	16.88	6.21	7.04	5.08	2.08	3.47	3.45	1.57	1.8	0.00085	Up
AT1G69780	Homeobox-leucine zipper protein family	15.81	26.97	14.88	10.85	4.77	4.08	7.17	4.79	1.8	1.9e-06	Up
AT1G13600	basic leucine-zipper 58	15.45	10.66	5.29	9.63	1.47	2.58	6.49	1.51	1.8	0.0047	Up
AT4G31590	Cellulose-synthase-like C5	15.14	32.79	23.11	15.57	5.12	7.22	8.32	5.73	1.8	2.3e-07	Up
AT4G25420	2-oxoglutarate (2OG) and Fe(II)-dependent oxygenase superfamily protein	14.29	16.18	15.23	15.6	4.15	5.51	6.69	1.66	1.8	8.4e-06	Up
AT2G27140	HSP20-like chaperones superfamily protein	14.28	25.63	15.5	9.97	6.71	5.03	5.41	3.41	1.8	1.3e-05	Up
AT4G28050	tetraspanin7	14.22	29.35	17.2	9.83	2.66	5.33	9.22	4.24	1.8	0.00052	Up
AT5G54670	kinesin 3	13.7	20.69	20.42	16.76	2.37	4.76	10.43	3.72	1.8	0.00011	Up
AT1G75900	GDSL-like Lipase/Acylhydrolase superfamily protein	13.35	26.12	11.03	10.21	2.71	6.41	6.16	3.39	1.8	0.00013	Up
AT2G47500	P-loop nucleoside triphosphate hydrolases superfamily protein with CH (Calponin Homology) domain	12.86	23.15	10.8	9.26	2.88	4.3	6.78	3.3	1.8	3.3e-05	Up
AT2G25060	early nodulin-like protein 14	11.66	14.55	6.85	2.77	2.68	2.65	3.07	2.6	1.8	0.0017	Up
AT5G24030	SLAC1 homologue 3	11.44	3.67	3.2	3.42	0.56	1.65	1.86	2.27	1.8	0.0023	Up
AT4G02130	galacturonosyltransferase 6	10.83	12.44	3.85	2.79	1.51	2.35	1.81	3.52	1.8	0.0027	Up
AT5G42860		10.61	31.42	20.48	12.54	2.99	4.47	8.72	6.82	1.8	0.00039	Up
AT2G34925	CLAVATA3/ESR-RELATED 42	10.51	12.56	8.59	7.01	0	4.83	4.15	2.73	1.8	0.023	Up
AT1G55810	uridine kinase-like 3	10.34	12.33	7.4	5.71	3.13	2.65	3.27	1.74	1.8	2.8e-07	Up
AT3G25640	Protein of unknown function, DUF617	9.16	6.24	6.17	3.86	2.04	1.67	3.12	0.95	1.8	0.0003	Up
AT1G66430	pfkB-like carbohydrate kinase family protein	9.15	15.16	2.32	1.53	2.17	2.86	1.83	1.83	1.8	0.018	Up
AT3G02640		8.28	16.61	7.48	4.61	2.93	2.42	3.96	1.99	1.8	0.0007	Up
AT1G54530	Calcium-binding EF hand family protein	8.26	11.52	14.47	9.41	3.14	4.58	4.17	1.58	1.8	0.00016	Up
AT4G32800	Integrase-type DNA-binding superfamily protein	8.24	5.08	6.67	1.1	1.34	1.09	1.96	2.12	1.8	0.0077	Up
AT5G46590	NAC domain containing protein 96	7.16	1.92	1.5	0.93	0.53	0.73	1.09	1.2	1.8	0.028	Up
AT2G28790	Pathogenesis-related thaumatin superfamily protein	7.12	10.4	12.23	3.99	2.01	1.99	3.75	2.61	1.8	0.00025	Up
AT1G14290	sphingoid base hydroxylase 2	6.21	11.22	5.39	3.84	1.37	2.45	2.57	1.75	1.8	8.8e-05	Up
AT3G44730	kinesin-like protein 1	6.13	9.94	5.81	4.67	1.12	1.99	3.19	1.64	1.8	1.5e-05	Up
AT2G35150	EXORDIUM like 1	5.92	7.11	4.84	2.99	0.95	2.17	2.59	0.68	1.8	0.0021	Up
AT4G23800	HMG (high mobility group) box protein	5.08	6.82	2.67	2.31	0.36	1.55	2.11	1.12	1.8	0.0049	Up
AT1G52910	Protein of unknown function (DUF1218)	5.01	12.34	7.52	3.36	0.71	2.5	4.23	1.05	1.8	0.012	Up
AT1G33480	RING/U-box superfamily protein	4.92	8.29	5.78	5.59	0.67	1.06	4.26	1.17	1.8	0.0043	Up
AT2G02780	Leucine-rich repeat protein kinase family protein	4.66	6.91	4.19	2.49	0.83	1.22	2.27	1.13	1.8	0.00017	Up
AT1G76540	cyclin-dependent kinase B2;1	4.37	6.02	3.38	3.03	1.01	0.91	1.63	1.44	1.8	3.3e-06	Up
AT3G17640	Leucine-rich repeat (LRR) family protein	4.25	5.39	3.63	2.49	0.93	0.79	2.43	0.51	1.8	0.0035	Up
AT2G30540	Thioredoxin superfamily protein	4.22	3.88	5.19	2.09	1.18	1.47	0.45	1.61	1.8	0.0028	Up
AT5G56720	Lactate/malate dehydrogenase family protein	4.08	4.77	3.58	3.11	0.94	1.34	1.3	1.08	1.8	5.4e-07	Up
AT2G03760	sulphotransferase 12	4	3.82	1.53	1.46	0.61	0.8	0.56	1.33	1.8	0.004	Up
AT1G68430		3.84	8.06	5.71	4.06	1.3	1.09	2.28	1.8	1.8	0.00071	Up
AT5G39420	CDC2C	3.81	11.13	6.42	4.82	2.02	1.48	3.6	0.96	1.8	0.0011	Up
AT5G42880	Plant protein of unknown function (DUF827)	3.77	4.8	3.31	2.37	0.39	0.94	1.93	1.12	1.8	0.00077	Up
AT4G24260	glycosyl hydrolase 9A3	3.37	6.09	3.86	3.36	0.76	1.06	2.12	1.1	1.8	6.5e-05	Up
AT3G14570	glucan synthase-like 4	3.3	3	2.35	1.81	0.66	0.94	0.79	0.71	1.8	4.8e-11	Up
AT1G14280	phytochrome kinase substrate 2	3.12	9.98	1.04	1.65	1.92	0.89	1.54	0.68	1.8	0.038	Up
AT4G00220	Lateral organ boundaries (LOB) domain family protein	3.1	2.4	1.48	1.46	0.37	0.83	0.89	0.47	1.8	0.00042	Up
AT5G45320		2.83	2.97	1.58	1.77	0.29	1.16	0.87	0.34	1.8	0.0049	Up
AT3G54560	histone H2A 11	2.77	5.98	1.97	1.72	0.65	1.4	0.58	1.1	1.8	0.004	Up
ATCG01070	NADH-ubiquinone/plastoquinone oxidoreductase chain 4L	2.19	8.63	8.64	3.16	2.3	1.73	1.61	1.39	1.8	0.019	Up
AT4G37110	Zinc-finger domain of monoamine-oxidase A repressor R1	2.1	3.18	1.64	0.87	1.54	0.27	0.34	0.25	1.8	0.024	Up
AT3G45610	Dof-type zinc finger DNA-binding family protein	2	5.92	1.52	1.23	0.7	0.91	0.96	0.63	1.8	0.012	Up
AT4G01130	GDSL-like Lipase/Acylhydrolase superfamily protein	1.96	3.15	1.42	1.33	0.55	0.84	0.85	0.22	1.8	0.0032	Up
AT3G55710	UDP-Glycosyltransferase superfamily protein	1.95	7.27	2.69	1.87	0.91	1.03	1.29	0.93	1.8	0.0022	Up
AT5G37180	sucrose synthase 5	1.94	2.87	2	1.56	0.39	0.64	0.76	0.64	1.8	2.1e-07	Up
AT1G21070	Nucleotide-sugar transporter family protein	1.87	3.98	1.78	0.45	0.71	0.33	0.84	0.61	1.8	0.017	Up
AT2G41150		1.82	1.77	1.57	1.75	0	0.58	0.69	0.82	1.8	0.016	Up
AT1G21740	Protein of unknown function (DUF630 and DUF632)	1.78	2.92	1.89	0.92	0.32	0.7	0.95	0.33	1.8	0.0023	Up
AT3G15800	Glycosyl hydrolase superfamily protein	1.7	2.87	1.77	2	0.05	1.24	0.6	0.63	1.8	0.014	Up
AT3G15620	DNA photolyase family protein	1.69	1.43	0.78	0.84	0.4	0.29	0.54	0.2	1.8	0.00063	Up
AT3G14760		1.41	3.23	3.6	3.91	1.11	0.71	1.63	0.2	1.8	0.014	Up
AT5G16230	Plant stearoyl-acyl-carrier-protein desaturase family protein	1.41	1.39	0.91	1.09	0.22	0.52	0.25	0.47	1.8	0.00015	Up
AT5G12330	Lateral root primordium (LRP) protein-related	1.29	1.07	0.93	0.63	0	0.36	0.18	0.59	1.8	0.033	Up
AT1G60360	RING/U-box superfamily protein	1.24	2.54	1.61	0.79	0.2	0.72	0.75	0.12	1.8	0.035	Up
AT5G62170		1.16	3.25	1.47	1.35	0.31	0.48	0.72	0.61	1.8	0.00091	Up
AT3G18670	Ankyrin repeat family protein	1.12	1.56	1.13	0.91	0	0.45	0.45	0.52	1.8	0.016	Up
AT1G67040		1.01	3.01	1.74	1.14	0.5	0.58	0.66	0.42	1.8	0.00057	Up
AT1G75710	C2H2-like zinc finger protein	0.94	2.1	0.9	0.76	0.43	0.44	0.31	0.29	1.8	0.002	Up
AT2G21550	Bifunctional dihydrofolate reductase/thymidylate synthase	0.94	0.77	0.33	0.26	0.1	0.16	0.25	0.2	1.8	0.021	Up
AT1G53920	GDSL-motif lipase 5	0.86	1.56	0.46	0.47	0.26	0.12	0.29	0.35	1.8	0.02	Up
AT2G20590	Reticulon family protein	0.66	1.2	0.41	0.63	0.14	0.3	0.32	0.09	1.8	0.015	Up
AT1G03780	targeting protein for XKLP2	0.55	1.13	0.57	0.27	0.35	0.1	0.26	0.1	1.8	0.019	Up
AT2G45840	Arabidopsis thaliana protein of unknown function (DUF821)	0.48	0.71	0.65	0.92	0.04	0.1	0.35	0.29	1.8	0.014	Up
AT3G21055	photosystem II subunit T	865.6	1088.76	594.33	505.56	260.41	286.56	299.85	169.86	1.7	4.9e-07	Up
AT3G62020	germin-like protein 10	242.19	284.22	243.02	208.64	40.85	78.32	135.05	68.39	1.7	8.7e-06	Up
AT1G13635	DNA glycosylase superfamily protein	175.02	269.21	259.52	216.23	32.48	71.6	141.63	43.43	1.7	0.00029	Up
AT5G15630	COBRA-like extracellular glycosyl-phosphatidyl inositol-anchored protein family	173.51	287.32	250.28	190.43	35.25	69.06	140.16	47.85	1.7	0.00026	Up
AT5G60020	laccase 17	159.14	177.48	176.3	132.81	19.74	45.09	98.37	39.58	1.7	0.00022	Up
AT2G40890	cytochrome P450, family 98, subfamily A, polypeptide 3	149.97	179.14	160.67	141.69	39.19	45.04	89.62	36.67	1.7	8.8e-07	Up
AT3G21190	O-fucosyltransferase family protein	141.64	207.68	186.88	153.08	26.9	53.27	95.78	43.79	1.7	2.1e-05	Up
AT5G03760	Nucleotide-diphospho-sugar transferases superfamily protein	117.47	206.6	177.22	135.16	21.75	43.36	97.18	38.62	1.7	0.00028	Up
AT1G75680	glycosyl hydrolase 9B7	92.48	152.1	103	76.13	22.33	31.47	56.9	28.01	1.7	1.2e-05	Up
AT4G28500	NAC domain containing protein 73	86.09	103.12	93.87	80.83	15.71	26.18	57.44	21.24	1.7	9.6e-05	Up
AT5G46340	O-acetyltransferase family protein	49.76	73.66	56.32	39.15	12.79	16.2	27.03	15.57	1.7	3.9e-07	Up
AT1G29920	chlorophyll A/B-binding protein 2	45.39	32.41	10.65	12.34	12.92	8.68	5.97	5.68	1.7	0.003	Up
AT3G16470	Mannose-binding lectin superfamily protein	41.53	16.91	18.14	7.4	6.84	5.43	5.96	9.54	1.7	0.0012	Up
AT5G06930		40.92	50.25	34.27	29.93	8.53	12.19	20.09	10.86	1.7	9.9e-07	Up
AT2G34410	O-acetyltransferase family protein	37.68	59.51	46.58	35.96	9.54	13.91	24.25	11.97	1.7	4e-06	Up
AT1G53070	Legume lectin family protein	36.86	61.09	33.88	26.89	11.5	10.37	19.22	10.44	1.7	6.8e-06	Up
AT5G15740	O-fucosyltransferase family protein	22.88	38.45	32.48	26.48	5.91	9.63	17.84	6.23	1.7	7.8e-05	Up
AT5G24760	GroES-like zinc-binding dehydrogenase family protein	21.86	32.11	23.58	21.37	3.94	8.39	12.37	7.53	1.7	7.2e-06	Up
AT5G66920	SKU5 similar 17	19.49	20.41	6.95	7.11	1.83	4.08	5.93	5.13	1.7	0.0015	Up
AT3G54920	Pectin lyase-like superfamily protein	18.99	15.78	6.82	6.47	4.02	4.01	4.22	3.97	1.7	9e-05	Up
AT4G16563	Eukaryotic aspartyl protease family protein	18.1	5.7	4.68	3.56	2.86	2.04	2.61	3.12	1.7	0.0045	Up
AT5G01890	Leucine-rich receptor-like protein kinase family protein	18.1	23.49	16.26	15.27	2.83	5.55	10.65	4.62	1.7	8.4e-05	Up
AT2G33385	actin-related protein C2B	17.9	22.18	18.77	13.53	3.94	5.47	10.37	3.44	1.7	3.7e-05	Up
AT1G65010	Plant protein of unknown function (DUF827)	17.8	26.48	14.85	12.55	4.38	5.78	9.21	4.57	1.7	9.4e-06	Up
AT5G16590	Leucine-rich repeat protein kinase family protein	16.6	33.07	15.38	11.7	7.05	4.78	8.51	5.3	1.7	5.8e-05	Up
AT4G38400	expansin-like A2	16.45	26.78	3.74	2.98	1.47	3.62	3.84	7.2	1.7	0.044	Up
AT1G27920	microtubule-associated protein 65-8	15.6	24.23	24.1	20.16	3.47	7.24	12.1	4.17	1.7	0.00011	Up
AT5G17760	P-loop containing nucleoside triphosphate hydrolases superfamily protein	14.75	18.79	14.67	14.95	3.42	4.45	8.4	4.25	1.7	5.8e-07	Up
AT1G60060	Serine/threonine-protein kinase WNK (With No Lysine)-related	14.02	11.44	8.35	8.83	3.59	4.16	3.8	2.45	1.7	2.3e-09	Up
AT3G43720	Bifunctional inhibitor/lipid-transfer protein/seed storage 2S albumin superfamily protein	13.42	32	13.74	9.07	3.59	4.62	7.4	6.02	1.7	0.00037	Up
AT2G24170	Endomembrane protein 70 protein family	12.75	19.26	11.21	9.33	2.64	3.31	6.96	4.61	1.7	5.7e-05	Up
AT1G05870	Protein of unknown function (DUF1685)	12.59	20.75	10.46	10.29	4	4.06	5.77	3.97	1.7	8.9e-07	Up
AT5G57070	hydroxyproline-rich glycoprotein family protein	12.4	12.22	8.82	5.95	2.69	2.91	4.43	3.01	1.7	1.7e-06	Up
AT1G26810	galactosyltransferase1	12.08	14.97	11	9.32	2.66	3.23	6.5	2.79	1.7	5e-06	Up
AT2G37585	Core-2/I-branching beta-1,6-N-acetylglucosaminyltransferase family protein	11.59	13.22	8.54	6.4	2.45	3.53	3.47	3.59	1.7	2.7e-07	Up
AT5G52280	Myosin heavy chain-related protein	11.5	15.81	9.69	8.76	2.29	4.32	5.25	3.19	1.7	2.2e-06	Up
AT5G45280	Pectinacetylesterase family protein	11.41	7.67	6.34	4.15	0.91	2.35	2.84	3.57	1.7	0.00074	Up
AT2G34150	SCAR family protein	11.26	18.25	13.36	9.99	2.69	4.04	7.27	3.41	1.7	2.1e-05	Up
AT1G67750	Pectate lyase family protein	11.17	27.08	11.96	8.72	5.41	4.93	5.46	3.01	1.7	0.00013	Up
AT1G46264	heat shock transcription factor B4	9.79	11.75	8.27	7.84	2.03	3.67	4.79	1.9	1.7	2.6e-05	Up
AT1G79760	downstream target of AGL15-4	9.65	15.33	7.18	9.22	2.78	3.61	5.36	1.85	1.7	0.00014	Up
AT3G53800	Fes1B	8.98	7.97	5.86	6.6	2.57	2.31	3.18	1.73	1.7	9.8e-09	Up
AT1G19330		8.97	7.09	4.33	4.32	2.07	2.17	2.57	1.45	1.7	5.6e-06	Up
AT1G54790	GDSL-like Lipase/Acylhydrolase superfamily protein	8.7	13.36	11.41	6.76	2.74	2.98	4.66	2.49	1.7	6.2e-07	Up
AT4G29310	Protein of unknown function (DUF1005)	7.81	12.57	5.54	4.14	1.58	2.25	3.64	2.05	1.7	0.00031	Up
AT3G20450	B-cell receptor-associated protein 31-like	7.62	10.68	8.3	7.17	1.86	3.89	3.61	1.69	1.7	8e-05	Up
AT3G09710	IQ-domain 1	6.57	10.74	6.43	4.89	1.81	2.02	3.29	2.29	1.7	6e-06	Up
AT3G17380	TRAF-like family protein	6.08	9.29	6.11	4.88	1.33	3.2	1.69	2.36	1.7	1.5e-05	Up
AT5G13460	IQ-domain 11	5.84	10.37	6	3.3	2.36	1.78	2.96	1.33	1.7	0.00029	Up
AT5G62180	carboxyesterase 20	5.7	8.51	5.17	4.04	0.8	1.11	3.06	2.29	1.7	0.0016	Up
AT4G01895	systemic acquired resistance (SAR) regulator protein NIMIN-1-related	5.62	1.86	2.29	1.83	1.19	0.69	0.44	1.58	1.7	0.048	Up
AT1G29200	O-fucosyltransferase family protein	5.29	8.92	8.88	5.71	0.72	2.79	4.33	1.6	1.7	0.0029	Up
AT2G29050	RHOMBOID-like 1	5.01	7.31	5.34	3.74	1.04	1.95	2.24	1.58	1.7	3.9e-06	Up
AT4G03175	Protein kinase superfamily protein	4.68	9.89	7.28	7.13	1.04	2.6	4.45	1.43	1.7	0.0042	Up
AT1G10800		4.64	3.29	2.64	3.27	0.93	1.49	1.42	0.56	1.7	0.0054	Up
AT1G02730	cellulose synthase-like D5	4.32	5.59	3.09	1.94	0.57	1.19	2.02	1	1.7	0.001	Up
AT3G18260	Reticulon family protein	4.24	5.07	4.11	3.48	0.74	1.78	1.46	1.53	1.7	4.4e-06	Up
AT3G25980	DNA-binding HORMA family protein	3.83	5.18	2.01	1.11	0.31	1.05	1.36	1.2	1.7	0.017	Up
AT4G33220	pectin methylesterase 44	3.78	6.19	2.11	2.01	0.72	1.17	1.35	1.47	1.7	0.00094	Up
AT1G66690	S-adenosyl-L-methionine-dependent methyltransferases superfamily protein	3.62	3.41	2.65	2.39	0.7	0.77	1.9	0.56	1.7	0.0018	Up
AT5G37790	Protein kinase superfamily protein	3.56	12.31	5.26	3.83	1.79	2.46	2.13	1.79	1.7	0.00059	Up
AT5G61750	RmlC-like cupins superfamily protein	3.47	5.41	3.9	5.09	0.79	2.41	1.65	0.86	1.7	0.0015	Up
AT3G49070	Protein of unknown function (DUF677)	3.22	3.14	1.62	1.8	0.32	0.8	1.38	0.58	1.7	0.0046	Up
AT4G16610	C2H2-like zinc finger protein	3.22	9.74	6.56	4.4	1.66	1.64	2.99	1.26	1.7	0.0014	Up
AT3G10680	HSP20-like chaperones superfamily protein	3.18	4.08	2.41	2.01	1.22	0.9	1.14	0.69	1.7	0.00011	Up
AT3G06140	RING/U-box superfamily protein	3.17	4.14	3.41	4.21	1.3	1.67	1.1	0.84	1.7	5.6e-08	Up
AT2G36500	CBS / octicosapeptide/Phox/Bemp1 (PB1) domains-containing protein	3.1	3.46	2.66	2.43	0.57	1.16	1.1	1	1.7	1.2e-06	Up
AT5G36920		3.05	4.55	4.26	2.89	1.21	1.42	1.06	1.05	1.7	0.00052	Up
AT2G46760	D-arabinono-1,4-lactone oxidase family protein	2.97	3.2	3.75	2.35	0.99	0.74	1.76	0.43	1.7	0.00058	Up
AT1G11740	ankyrin repeat family protein	2.81	5.66	4.86	3.51	0.88	0.96	2.76	1	1.7	0.0011	Up
AT4G14200	Pentatricopeptide repeat (PPR) superfamily protein	2.81	5.27	2.27	1.89	0.85	0.93	1.66	0.68	1.7	0.0011	Up
AT5G14230		2.67	1.84	0.92	0.98	0.52	0.39	0.76	0.39	1.7	0.0011	Up
AT1G10850	Leucine-rich repeat protein kinase family protein	2.51	5.13	1.69	1.3	0.91	0.78	1.05	0.74	1.7	0.002	Up
AT1G49430	long-chain acyl-CoA synthetase 2	2.44	6.83	2.65	2.51	0.82	1.28	1.6	1.04	1.7	0.0005	Up
AT1G66460	Protein kinase superfamily protein	2.38	4.34	3.48	3.06	0.49	0.94	1.86	1.02	1.7	0.00044	Up
AT2G01008		2.29	2.48	2.22	3.11	0.79	1.02	0.52	0.85	1.7	8.6e-07	Up
AT3G17350		2.26	4.78	2.06	2.03	0.73	0.76	1.44	0.78	1.7	0.0032	Up
AT5G12050		2.03	2.89	2.5	2.52	1	0.83	0.52	0.86	1.7	8.9e-06	Up
AT1G33811	GDSL-like Lipase/Acylhydrolase superfamily protein	1.85	6.31	2.58	2.27	1.23	0.8	1.59	0.8	1.7	0.0043	Up
AT3G23890	topoisomerase II	1.61	2.1	0.94	0.54	0.28	0.4	0.7	0.35	1.7	0.0042	Up
AT3G44610	Protein kinase superfamily protein	1.58	2.52	0.94	0.83	0.47	0.52	0.46	0.47	1.7	0.00064	Up
AT2G34670	Protein of unknown function (DUF630 and DUF632)	1.54	1.86	0.74	0.84	0.41	0.38	0.34	0.45	1.7	0.00044	Up
AT3G61760	DYNAMIN-like 1B	1.49	1.88	2.03	1.52	0.66	0.32	0.59	0.63	1.7	6e-07	Up
AT3G60840	microtubule-associated protein 65-4	1.48	2.54	1.01	0.87	0.14	0.67	0.49	0.61	1.7	0.0086	Up
AT1G20080	Calcium-dependent lipid-binding (CaLB domain) family protein	1.47	0.86	1.66	1.33	0.28	0.52	0.46	0.35	1.7	1.9e-05	Up
AT1G14700	purple acid phosphatase 3	1.46	1.92	0.86	0.84	0.45	0.41	0.55	0.27	1.7	0.0016	Up
AT2G34920	RING/U-box superfamily protein	1.31	2.87	0.96	0.95	0.48	0.54	0.53	0.45	1.7	0.0018	Up
AT4G06534		1.3	2.4	1.74	1.22	0.17	0.58	1.16	0.25	1.7	0.031	Up
AT5G25370	phospholipase D alpha 3	1.22	1.6	1.57	0.9	0.3	0.55	0.41	0.44	1.7	3.4e-05	Up
AT5G66750	chromatin remodeling 1	1.01	0.85	0.38	0.25	0.12	0.38	0.13	0.15	1.7	0.023	Up
AT3G55690		0.95	1.54	1.38	1.14	0	0.31	0.6	0.63	1.7	0.028	Up
AT3G46480	2-oxoglutarate (2OG) and Fe(II)-dependent oxygenase superfamily protein	0.83	1.36	1.02	0.88	0.21	0.34	0.48	0.3	1.7	0.00082	Up
AT5G01570		0.71	1.12	0.48	1.23	0.14	0.24	0.46	0.29	1.7	0.02	Up
AT2G18180	Sec14p-like phosphatidylinositol transfer family protein	0.42	1.27	0.6	0.76	0.08	0.36	0.35	0.18	1.7	0.019	Up
AT5G38420	Ribulose bisphosphate carboxylase (small chain) family protein	1794.26	3060.16	1746.79	1110.66	753.28	621.47	1076.76	313.21	1.6	0.00077	Up
AT1G30380	photosystem I subunit K	460.08	601.78	287.99	225.33	147.49	157.43	151.27	96.21	1.6	1.8e-05	Up
AT5G12250	beta-6 tubulin	361.08	480.27	375.47	304.14	78.87	125.19	205.11	100.73	1.6	2.1e-06	Up
AT4G18780	cellulose synthase family protein	241.71	321.32	297.89	265.9	45.55	91.41	192.28	69.31	1.6	0.00052	Up
AT3G18280	Bifunctional inhibitor/lipid-transfer protein/seed storage 2S albumin superfamily protein	237.23	197.55	165.07	153.27	53.59	80.96	80.31	51.34	1.6	1.2e-09	Up
AT1G04820	tubulin alpha-4 chain	198.08	370.79	206.65	138.77	65.87	66.93	104.95	72.09	1.6	7.3e-06	Up
AT3G46780	plastid transcriptionally active 16	167.22	161.5	93.05	77.32	44.19	52.27	56.54	20.43	1.6	0.00012	Up
AT5G23860	tubulin beta 8	166.12	323.03	258.15	183.66	54.44	75.45	143.11	54.14	1.6	0.00015	Up
AT4G35100	plasma membrane intrinsic protein 3	120.7	376.14	116.88	94	60.83	64.11	81.2	50.87	1.6	0.0021	Up
AT2G28315	Nucleotide/sugar transporter family protein	113.07	168.2	144.64	111	23.98	38.9	83.78	38.8	1.6	0.00012	Up
AT5G14200	isopropylmalate dehydrogenase 1	112.08	81.81	102.87	63.35	26.87	39.61	8.42	51.48	1.6	0.0021	Up
AT5G54690	galacturonosyltransferase 12	105.99	158.34	164.27	141.02	25.18	46.5	91.6	35.94	1.6	0.00021	Up
AT5G15490	UDP-glucose 6-dehydrogenase family protein	98.4	188.59	130.84	88.29	26.45	40.35	65.96	46.04	1.6	4.7e-05	Up
AT5G51550	EXORDIUM like 3	78.49	46.43	19.62	14.17	15.28	10.21	19.68	10.44	1.6	0.0069	Up
AT3G10740	alpha-L-arabinofuranosidase 1	68.02	47.75	34.32	37.14	12.29	15.85	22.7	12.45	1.6	5.6e-07	Up
AT3G59400	enzyme binding;tetrapyrrole binding	65.97	76.68	40.45	38.67	16.09	22.43	27.01	9.9	1.6	7.4e-05	Up
AT2G38360	prenylated RAB acceptor 1.B4	65.38	110.46	79.58	51.6	21.15	21	42.12	26.04	1.6	2.9e-05	Up
AT1G09610	Protein of unknown function (DUF579)	59.76	86.85	73	61.43	16.54	27.79	38.56	17.14	1.6	6.5e-06	Up
AT3G06750	hydroxyproline-rich glycoprotein family protein	50.79	79.4	43.77	32.95	21.05	18.37	22.75	9.73	1.6	7.2e-05	Up
AT2G46630		45.71	48.54	37.35	21.88	10.1	16.14	15.69	11.99	1.6	2.3e-06	Up
AT5G04200	metacaspase 9	31.11	24.07	22.98	22.37	7.08	9.85	10.98	7.18	1.6	3e-11	Up
AT5G64910		28.47	5.49	6.94	6.86	2.9	4.33	4.87	4.14	1.6	0.0061	Up
AT5G20270	heptahelical transmembrane protein1	26.89	45.2	26.85	21.9	9.38	9.79	13.59	9.68	1.6	4.1e-07	Up
AT2G05790	O-Glycosyl hydrolases family 17 protein	23.4	47.48	20.84	21.27	5.81	9.42	16.24	8.27	1.6	0.00046	Up
AT1G63300	Myosin heavy chain-related protein	22.55	27.41	25.41	22.29	4.35	7.55	16.11	5.97	1.6	0.00021	Up
AT1G67050		21.68	53.31	17.91	17.37	8.66	9.64	13.67	7.84	1.6	0.0011	Up
AT4G23790	TRICHOME BIREFRINGENCE-LIKE 24	21	35.21	19.78	16.49	5.67	8.6	10.63	8.21	1.6	8.4e-06	Up
AT4G08160	glycosyl hydrolase family 10 protein / carbohydrate-binding domain-containing protein	19.8	19.57	18.22	16.02	4.09	6.54	10.14	4.66	1.6	1.2e-06	Up
AT4G34260	1,2-alpha-L-fucosidases	19.78	15.6	5.66	6.48	3.06	4.39	4.7	4.72	1.6	0.001	Up
AT4G24510	HXXXD-type acyl-transferase family protein	18.83	48.51	22.87	17.27	8.07	8.15	11.3	8.98	1.6	6.5e-05	Up
AT5G01930	Glycosyl hydrolase superfamily protein	16.85	18.81	12.88	12.04	5.74	5.28	6.22	3.4	1.6	2.1e-08	Up
AT3G61380	Phosphatidylinositol N-acetyglucosaminlytransferase subunit P-related	16.07	13.14	9.52	9.61	3.02	4.4	5.61	3.93	1.6	2e-07	Up
AT5G20970	HSP20-like chaperones superfamily protein	15.43	16.51	15.11	10.89	5.27	5.13	5.69	4.34	1.6	4.9e-11	Up
AT2G21560		14.5	27.89	22.02	18.92	8.35	6.52	10.82	2.84	1.6	0.00032	Up
AT1G52270		14.4	17.89	13.39	7.42	5.64	5.71	3.91	3.94	1.6	6.6e-05	Up
AT1G54040	epithiospecifier protein	12.86	2.96	3.08	2.79	1.49	2.76	1.68	1.56	1.6	0.01	Up
AT1G19850	Transcriptional factor B3 family protein / auxin-responsive factor AUX/IAA-related	11.23	4.98	5.24	4.56	1.61	2.96	3.33	1.38	1.6	0.00067	Up
AT2G40230	HXXXD-type acyl-transferase family protein	10.35	4.8	8.12	7.31	3.29	2.52	2.84	2.02	1.6	4e-07	Up
AT5G22460	alpha/beta-Hydrolases superfamily protein	10.23	26.67	8.48	6.99	3.65	3.4	6.31	4.74	1.6	0.0023	Up
AT3G49260	IQ-domain 21	10.05	13.59	13.12	10.84	3.39	3.6	6.36	2.98	1.6	1.8e-07	Up
AT5G26660	myb domain protein 86	8.45	15.59	11.17	8.82	1.82	3.96	7.5	2.08	1.6	0.0035	Up
AT5G14410		8.18	13.87	5.84	4.76	1.36	5.39	3.06	1.65	1.6	0.014	Up
AT2G30070	potassium transporter 1	7.86	4.65	3.59	2.86	1.19	1.4	1.97	1.92	1.6	8.6e-05	Up
AT5G18460	Protein of Unknown Function (DUF239)	6.88	10.29	6.29	4.55	1.98	2.09	3.95	1.97	1.6	9.2e-05	Up
AT5G54530	Protein of unknown function, DUF538	6.83	10.38	4.29	3.06	1.65	2	3.03	1.92	1.6	0.0015	Up
AT1G09812		6.63	13.55	9	9.62	2.9	2.38	5.48	3.02	1.6	0.00032	Up
AT3G18850	lysophosphatidyl acyltransferase 5	6.3	15.01	7.21	8.06	2.33	4.1	3.74	2.65	1.6	8.9e-05	Up
AT2G31730	basic helix-loop-helix (bHLH) DNA-binding superfamily protein	6.09	2.37	1.21	0.86	1.1	1.19	0.52	0.78	1.6	0.03	Up
AT1G70500	Pectin lyase-like superfamily protein	5.98	5.84	5.08	4.86	1.73	2.15	1.86	1.95	1.6	5.9e-13	Up
AT2G27740	Family of unknown function (DUF662)	5.91	11.76	7.93	4.64	1.61	2.52	4.55	1.76	1.6	0.0027	Up
AT3G60130	beta glucosidase 16	5.4	7.15	2.87	1.96	0.76	2.14	1.2	1.84	1.6	0.0035	Up
AT3G22400	PLAT/LH2 domain-containing lipoxygenase family protein	4.84	8.66	3.86	2.94	1.33	1.73	2.18	1.85	1.6	0.00016	Up
AT4G26790	GDSL-like Lipase/Acylhydrolase superfamily protein	4.8	12.79	8.13	5.98	2.67	3.58	2.95	2.12	1.6	0.00015	Up
AT5G44670	Domain of unknown function (DUF23)	4.79	14.67	8.42	7.17	2.35	3.22	3.87	3.08	1.6	0.0002	Up
AT3G57780		4.69	5.49	3.15	2.8	0.96	0.94	1.83	1.96	1.6	0.00022	Up
AT5G48290	Heavy metal transport/detoxification superfamily protein	4.59	8.61	2.44	2.5	1.22	1.1	2.66	1.55	1.6	0.019	Up
AT5G54200	Transducin/WD40 repeat-like superfamily protein	4.45	5.67	3.05	2.47	0.92	1.38	2.06	1.06	1.6	0.00021	Up
AT2G29710	UDP-Glycosyltransferase superfamily protein	4.27	2.9	4.06	1.35	0.42	1.47	0.85	1.53	1.6	0.007	Up
AT3G04630	WVD2-like 1	4.12	5.31	2.88	1.94	0.86	1.56	1.32	1.07	1.6	0.00027	Up
AT1G75720	Plant protein of unknown function (DUF827)	3.31	3.02	1.72	2.03	0.55	1.27	0.27	1.32	1.6	0.016	Up
ATCG01050	NADH-Ubiquinone/plastoquinone (complex I) protein	3.21	6.38	7.25	3.99	2.38	1.77	1.17	1.8	1.6	9.2e-05	Up
AT5G27660	Trypsin family protein with PDZ domain	3.19	7.26	3.02	2	1.6	0.79	1.48	1.44	1.6	0.0018	Up
AT3G27660	oleosin 4	2.69	5.17	5.49	3.61	0.63	1.62	1.65	1.67	1.6	0.00035	Up
AT5G45540	Protein of unknown function (DUF594)	2.58	2.94	1.98	1.98	0.41	1.01	0.92	0.91	1.6	2.7e-05	Up
AT1G62700	Arabidopsis NAC domain containing protein 26	2.51	1.85	2.23	1.86	0.71	0.69	0.98	0.46	1.6	3.5e-05	Up
AT2G17940	Plant protein of unknown function (DUF827)	2.5	4	4.08	3.45	1.61	0.52	1.92	0.7	1.6	0.0028	Up
AT1G29195		2.48	4.64	1.64	1.72	1.52	0.82	0.72	0.71	1.6	0.013	Up
AT3G11180	2-oxoglutarate (2OG) and Fe(II)-dependent oxygenase superfamily protein	2.37	3.61	3.3	2.7	0.24	1.15	2.2	0.46	1.6	0.019	Up
AT2G19170	subtilisin-like serine protease 3	2.35	3.25	2.07	1.28	0.53	0.8	0.94	0.87	1.6	0.00011	Up
AT3G45710	Major facilitator superfamily protein	2.24	0.99	0.51	0.8	0.38	0.39	0.35	0.49	1.6	0.019	Up
AT5G25160	zinc finger protein 3	1.97	1.12	0.92	1.35	0.52	0.24	0.77	0.38	1.6	0.025	Up
AT5G44110	P-loop containing nucleoside triphosphate hydrolases superfamily protein	1.89	4.55	1.79	1.73	0.78	0.98	1.06	0.69	1.6	0.0033	Up
AT3G10185	Gibberellin-regulated family protein	1.87	1.61	3.41	1.87	0.65	0.38	0.59	1.27	1.6	0.02	Up
AT4G21480	sugar transporter protein 12	1.79	1.84	1.38	1.59	0.25	0.71	0.75	0.52	1.6	0.00025	Up
AT4G24250	Seven transmembrane MLO family protein	1.78	2.57	1.24	1.4	0.22	0.83	0.82	0.53	1.6	0.0028	Up
AT5G63650	SNF1-related protein kinase 2.5	1.74	3.27	2.36	1.55	0.82	1.17	0.73	0.44	1.6	0.0011	Up
AT5G06150	Cyclin family protein	1.7	2.77	1.26	0.35	0.3	0.67	0.75	0.41	1.6	0.037	Up
AT1G53660	nodulin MtN21 /EamA-like transporter family protein	1.59	3.06	2.44	1.21	0.63	0.49	0.96	0.82	1.6	0.0021	Up
AT5G43870	Plant protein of unknown function (DUF828) with plant pleckstrin homology-like region	1.54	3.12	1.36	1.01	0.48	0.79	0.59	0.6	1.6	0.0014	Up
AT5G19870	Family of unknown function (DUF716)	1.53	1.31	1.61	1.37	0.58	0.68	0.59	0.18	1.6	0.0083	Up
AT5G43160	Family of unknown function (DUF566)	1.53	3.19	2.84	2.51	0.53	0.9	0.8	1.2	1.6	0.00019	Up
AT2G07690	Minichromosome maintenance (MCM2/3/5) family protein	1.43	2.04	0.86	0.45	0.63	0.31	0.49	0.24	1.6	0.011	Up
AT3G15550		1.34	2.11	1.05	0.65	0.44	0.34	0.76	0.29	1.6	0.0099	Up
AT4G11080	HMG (high mobility group) box protein	1.32	2.43	1.43	1.13	0.38	0.73	0.59	0.53	1.6	0.001	Up
AT5G57670	Protein kinase superfamily protein	1.27	1.3	0.89	0.73	0.21	0.38	0.62	0.24	1.6	0.0031	Up
AT5G04700	Ankyrin repeat family protein	1.21	1.25	0.84	1	0.12	0.56	0.47	0.34	1.6	0.003	Up
AT2G28620	P-loop containing nucleoside triphosphate hydrolases superfamily protein	1.16	2.48	0.54	0.54	0.41	0.58	0.42	0.26	1.6	0.019	Up
AT2G16270		1.07	1.71	0.79	0.32	0.36	0.42	0.26	0.3	1.6	0.017	Up
AT5G24290	Vacuolar iron transporter (VIT) family protein	1.05	0.68	0.78	0.32	0.23	0.27	0.07	0.4	1.6	0.03	Up
AT3G48770	DNA binding;ATP binding	1.01	1.61	0.69	1.01	0.29	0.42	0.63	0.2	1.6	0.0018	Up
AT3G15030	TCP family transcription factor 4	0.98	1.73	0.87	1.27	0.12	0.31	0.71	0.55	1.6	0.013	Up
AT1G03840	C2H2 and C2HC zinc fingers superfamily protein	0.97	2.31	2.89	2.58	0.61	0.85	1.01	0.55	1.6	0.00088	Up
AT1G70430	Protein kinase superfamily protein	0.95	1.52	0.63	0.8	0.26	0.23	0.45	0.42	1.6	0.0021	Up
AT4G29240	Leucine-rich repeat (LRR) family protein	0.89	3.47	1.61	0.9	0.79	0.29	1.01	0.3	1.6	0.045	Up
AT2G18470	roline-rich extensin-like receptor kinase 4	0.57	1.91	1.31	0.49	0.44	0.17	0.56	0.31	1.6	0.026	Up
AT1G60270	beta glucosidase 6	0.52	0.72	0.24	0.35	0.12	0.2	0.12	0.19	1.6	0.03	Up
AT4G02390	poly(ADP-ribose) polymerase	0.46	0.64	0.34	0.38	0.05	0.2	0.18	0.18	1.6	0.0073	Up
AT5G41000	YELLOW STRIPE like 4	0.4	0.82	0.26	0.27	0.07	0.1	0.2	0.22	1.6	0.046	Up
AT4G10340	light harvesting complex of photosystem II 5	991.37	1085.17	621.1	531.95	321.51	339.61	330.48	209.84	1.5	2.1e-06	Up
AT2G36880	methionine adenosyltransferase 3	795.11	1126.49	1063.27	890.26	204.72	310.85	597.44	277.15	1.5	2.6e-05	Up
AT1G78370	glutathione S-transferase TAU 20	579.67	366.97	484.92	282.78	136.91	187.33	62.18	230.2	1.5	0.00032	Up
AT1G51400	Photosystem II 5 kD protein	371.33	314.41	174.76	177.94	107.42	99.43	112.82	60.08	1.5	1.9e-05	Up
AT4G21280	photosystem II subunit QA	332.16	431.33	228.13	169.51	111.81	105.67	129.97	74.58	1.5	1.7e-05	Up
AT3G08940	light harvesting complex photosystem II	282.39	221.54	105.74	96.18	80.54	71.73	65.8	48.77	1.5	0.00034	Up
AT3G13520	arabinogalactan protein 12	175.2	440.52	152.76	117.99	60.82	81.64	120.53	73.44	1.5	0.003	Up
AT5G44340	tubulin beta chain 4	150.44	237.05	124.42	91.99	49.64	51.63	66.87	63.02	1.5	1.9e-05	Up
AT3G59970	methylenetetrahydrofolate reductase 1	136.43	170.38	132.24	98.95	36.58	50.95	67.68	48.91	1.5	1.5e-07	Up
AT1G06640	2-oxoglutarate (2OG) and Fe(II)-dependent oxygenase superfamily protein	134.08	108.52	102.75	56.17	44.34	30.37	33.08	45.23	1.5	3.3e-06	Up
AT1G72230	Cupredoxin superfamily protein	128.05	310.05	157.57	177.95	38.73	66.98	132.92	54.8	1.5	0.0023	Up
AT1G10670	ATP-citrate lyase A-1	94.2	140.73	98.95	81.33	29.06	34.49	52.15	34.03	1.5	1.1e-07	Up
AT5G52060	BCL-2-associated athanogene 1	88.21	103.31	90.47	62.21	25.21	32.18	41.75	30.59	1.5	1e-08	Up
AT3G24480	Leucine-rich repeat (LRR) family protein	86.51	102.51	47.26	38	17.88	25.8	31.97	25.35	1.5	0.00016	Up
AT2G32720	cytochrome B5 isoform B	75.64	128.24	97.15	83.32	24.95	33.14	57.62	26.32	1.5	2.4e-05	Up
AT5G24490	30S ribosomal protein, putative	69.03	33.92	24.27	30.9	18.17	19.18	15.59	7.64	1.5	0.00086	Up
AT4G39350	cellulose synthase A2	58.9	79.3	65.34	49.59	18.72	21.02	33.85	21.79	1.5	1.1e-07	Up
AT1G09440	Protein kinase superfamily protein	54.83	94.45	90.5	87.17	12.55	30.9	56.77	24.59	1.5	0.0021	Up
AT2G23360	Plant protein of unknown function (DUF869)	51.76	83.28	80.68	67.32	14.98	23.08	45.9	19.39	1.5	0.00014	Up
AT1G10200	GATA type zinc finger transcription factor family protein	42.9	77.09	40.61	31.17	14.86	16.71	22.31	17.46	1.5	2e-05	Up
AT1G26770	expansin A10	42.69	68.74	36.99	45.47	15.66	15.86	23.64	16.63	1.5	2.1e-07	Up
AT5G50370	Adenylate kinase family protein	41.85	55.25	48.91	35.9	11.65	18.87	21.56	16.9	1.5	7.1e-08	Up
AT4G17890	ARF-GAP domain 8	41.21	50.26	36.42	33.84	11.68	15.93	18.88	14.94	1.5	9.7e-10	Up
AT1G29395	COLD REGULATED 314 INNER MEMBRANE 1	41.18	55.79	34.28	26.93	15.74	12.02	17.28	14.06	1.5	5.6e-07	Up
AT5G47635	Pollen Ole e 1 allergen and extensin family protein	36.4	58.83	59.58	48.45	9.85	17.37	39.14	10.31	1.5	0.0043	Up
AT3G52900	Family of unknown function (DUF662)	32.85	36.31	31.59	24.95	9.06	14.12	17.05	7.14	1.5	1.7e-05	Up
AT1G28290	arabinogalactan protein 31	32.64	27.34	10.76	12.32	7.43	6.44	11.63	5.65	1.5	0.0018	Up
AT4G17670	Protein of unknown function (DUF581)	28.58	46.35	30.66	31.61	14.42	15.29	13.27	10.13	1.5	2.9e-08	Up
AT5G62360	Plant invertase/pectin methylesterase inhibitor superfamily protein	24.13	15.08	8.23	8	6.06	5.05	4.01	5.45	1.5	0.0011	Up
AT4G33666		22.87	21.5	14.45	16.78	13.4	6.13	6.94	1.99	1.5	0.0076	Up
AT5G15350	early nodulin-like protein 17	22	48.41	10.67	5.84	5.89	8.38	6.39	11.76	1.5	0.028	Up
AT4G18640	Leucine-rich repeat protein kinase family protein	19.18	29.44	21.66	20.5	4.8	8.3	15.02	6.73	1.5	0.00028	Up
AT2G40120	Protein kinase superfamily protein	19.05	42.17	31.83	27.9	6.29	11.52	18.58	9.54	1.5	0.00046	Up
AT1G46480	WUSCHEL related homeobox 4	18.89	18.46	13.84	10.26	6.14	5.63	6.04	5.52	1.5	1.2e-07	Up
AT2G41820	Leucine-rich repeat protein kinase family protein	17.83	28.86	15.55	15.15	5.47	6.42	11.53	5.8	1.5	8.8e-05	Up
AT2G41770	Protein of unknown function (DUF288)	17.62	34.01	27.19	19.56	7.05	9.81	13.45	7.62	1.5	2.3e-05	Up
AT1G65860	flavin-monooxygenase glucosinolate S-oxygenase 1	17.37	12.45	21.97	9.39	5	6.89	2.18	8.7	1.5	0.0016	Up
AT2G26690	Major facilitator superfamily protein	15.67	12.89	5.82	5.06	4.81	2.7	3.79	3.13	1.5	0.00077	Up
AT1G23030	ARM repeat superfamily protein	15.5	17.49	8.85	7.13	4.05	4.8	4.03	5.42	1.5	5.6e-05	Up
AT2G42320	nucleolar protein gar2-related	15.37	8.84	5.92	5.19	1.98	3.97	3.97	3.58	1.5	0.0012	Up
AT2G29310	NAD(P)-binding Rossmann-fold superfamily protein	14.76	24.81	17.15	13.14	5.31	10.33	5.85	5.11	1.5	6.3e-05	Up
AT1G19450	Major facilitator superfamily protein	14.38	20.69	10.69	8.9	3.56	4.25	6.62	5.58	1.5	5e-05	Up
AT5G64900	precursor of peptide 1	13.47	11.74	9.64	5.37	1.63	2.16	3.53	7.69	1.5	0.016	Up
AT1G64400	AMP-dependent synthetase and ligase family protein	13.17	25.66	16.58	12.42	4.13	8.34	8.56	4.92	1.5	0.00016	Up
AT2G27130	Bifunctional inhibitor/lipid-transfer protein/seed storage 2S albumin superfamily protein	13.12	15.35	8.53	6.96	4.9	4.27	4.33	2.57	1.5	8.1e-05	Up
ATCG00560	photosystem II reaction center protein L	13.03	31.72	41.45	18.74	13.76	10.03	7.37	7.27	1.5	0.0077	Up
AT5G26330	Cupredoxin superfamily protein	13	22.97	15.55	15.52	4.39	4.57	10.6	4.89	1.5	0.00021	Up
AT3G18710	plant U-box 29	12.46	28.23	14.25	7.89	5.24	4.6	6.2	6.86	1.5	0.00073	Up
AT4G18260	Cytochrome b561/ferric reductase transmembrane protein family	12.09	25.57	11.98	8.33	3.99	6.63	6.71	5.02	1.5	0.00063	Up
AT5G04890	HSP20-like chaperones superfamily protein	11.94	13.36	11.55	10.92	2.98	4.94	5.91	3.6	1.5	9.7e-08	Up
AT5G34940	glucuronidase 3	10.43	17.66	10.45	6.73	5.91	3.14	3.78	4.42	1.5	0.00012	Up
AT1G10370	Glutathione S-transferase family protein	10.12	6.76	3.93	3.94	2.05	2.25	1.64	3.04	1.5	0.00091	Up
AT4G03110	RNA-binding protein-defense related 1	9.46	6.51	2.75	1.72	1.55	1.83	2.12	2.34	1.5	0.014	Up
AT5G09805	inflorescence deficient in abscission (IDA)-like 3	9.35	14.99	11.76	6.66	3.69	5.87	3.28	2.83	1.5	0.0027	Up
AT2G20680	Glycosyl hydrolase superfamily protein	9.28	15.95	14.88	11.22	2.6	5.09	7.42	3.75	1.5	0.00012	Up
AT5G10390	Histone superfamily protein	9.1	10.14	6.76	3.85	2.29	3.17	3.59	2.42	1.5	0.0017	Up
AT1G60390	polygalacturonase 1	8.8	16.7	9.25	5.9	2.46	5.34	4.44	3.06	1.5	0.00085	Up
ATCG00130	ATPase, F0 complex, subunit B/B', bacterial/chloroplast	8.6	16.63	21.73	11.98	10.38	4.71	3.3	4.3	1.5	0.0023	Up
AT1G72500		8.37	11.81	8.6	7.23	2.81	3.41	4.34	2.73	1.5	7.8e-08	Up
AT5G41050	Pollen Ole e 1 allergen and extensin family protein	7.67	13.18	5.9	5.02	2.31	2.87	4.55	1.94	1.5	0.0025	Up
AT4G01410	Late embryogenesis abundant (LEA) hydroxyproline-rich glycoprotein family	7.28	13.49	11.84	6.22	3.2	3.74	3.68	3.87	1.5	6.3e-05	Up
AT1G77590	long chain acyl-CoA synthetase 9	6.99	9.83	4.58	3.92	1.71	2.64	3.17	2.2	1.5	0.00033	Up
AT5G44210	erf domain protein 9	6.94	5.71	3.73	4.31	1.99	2.15	2.66	0.91	1.5	0.001	Up
AT5G16720	Protein of unknown function, DUF593	6.78	10.97	5.84	4.74	1.87	3.5	3.58	1.93	1.5	0.00055	Up
AT4G22130	STRUBBELIG-receptor family 8	6.44	11.73	6.29	5.02	1.62	3.41	3.88	2.42	1.5	0.0006	Up
AT3G30460	RING/U-box superfamily protein	6.22	8.35	4.49	6.77	1.96	3.78	2.68	1	1.5	0.0032	Up
AT4G39900		6.2	4.08	2.75	2.6	1.38	1.53	1.61	1.2	1.5	0.00015	Up
AT4G36920	Integrase-type DNA-binding superfamily protein	6.06	10.36	7.06	8.52	1.9	3.61	3.44	2.82	1.5	1.2e-06	Up
AT3G58850	phy rapidly regulated 2	5.68	22.1	4.48	5.13	2.38	4.57	4.79	2.67	1.5	0.047	Up
AT3G47540	Chitinase family protein	5.43	5.54	3.59	1.86	1.64	0.55	1.47	2.36	1.5	0.012	Up
AT2G42570	TRICHOME BIREFRINGENCE-LIKE 39	5.35	6.78	3.44	3.04	1.41	2.18	1.75	1.75	1.5	0.00011	Up
AT3G10700	galacturonic acid kinase	5.34	6.55	6.23	3.73	1.31	2.26	2.55	2.14	1.5	4.1e-06	Up
AT2G34140	Dof-type zinc finger DNA-binding family protein	5.33	4.25	2.62	2.56	1.4	0.93	0.86	2.35	1.5	0.007	Up
AT1G49730	Protein kinase superfamily protein	5.26	4.38	2.78	1.75	0.89	1.15	2.06	1.07	1.5	0.0022	Up
AT1G07880	Protein kinase superfamily protein	5.21	5.76	2.95	1.71	1.28	1.62	1.95	0.84	1.5	0.0053	Up
AT5G16000	NSP-interacting kinase 1	4.61	7.1	5.35	4.92	1.76	1.85	3.25	1.41	1.5	3.4e-05	Up
AT3G48460	GDSL-like Lipase/Acylhydrolase superfamily protein	4.49	5.91	5.74	3.94	2.64	1.81	1.72	1.66	1.5	1.4e-06	Up
AT5G06470	Glutaredoxin family protein	4.07	6.24	1.96	3.31	1.26	1.14	2.82	0.42	1.5	0.042	Up
AT1G13920	Remorin family protein	3.97	4.92	4.33	3.58	1.22	2.36	0.94	1.71	1.5	8.9e-05	Up
AT5G15120	Protein of unknown function (DUF1637)	3.93	4.49	1.96	2.8	1.2	1.65	0.97	1.22	1.5	0.00042	Up
AT1G05770	Mannose-binding lectin superfamily protein	3.88	3.74	1.77	2.45	1.35	1.44	1.03	0.61	1.5	0.005	Up
AT5G23210	serine carboxypeptidase-like 34	3.7	7.42	2.75	2.31	1.39	1.44	1.82	1.41	1.5	0.001	Up
AT1G22170	Phosphoglycerate mutase family protein	3.65	4.31	3.2	3.58	0.84	1.38	1.84	1.31	1.5	3.3e-06	Up
AT2G27060	Leucine-rich repeat protein kinase family protein	3.43	5.24	2.64	1.71	0.92	1.45	1.65	1.02	1.5	0.0017	Up
AT5G27450	mevalonate kinase	3.36	7.34	4.44	2.19	1.91	1.64	2.2	1	1.5	0.004	Up
AT3G57920	squamosa promoter binding protein-like 15	3.17	9.78	3.65	1.96	1.58	1.78	2.69	1.13	1.5	0.025	Up
AT5G04820	ovate family protein 13	3.14	3.12	0.98	2.93	0.86	1.36	0.9	0.62	1.5	0.0085	Up
AT2G40960	Single-stranded nucleic acid binding R3H protein	3	3.14	1.6	2.34	0.26	1.52	0.67	1.29	1.5	0.013	Up
AT4G00890	proline-rich family protein	2.89	5.9	2.98	2.78	1.08	1.86	1.55	1.09	1.5	0.0018	Up
AT5G54570	beta glucosidase 41	2.74	3.38	3.63	2.33	0.27	1.31	2.11	0.89	1.5	0.016	Up
AT3G49670	Leucine-rich receptor-like protein kinase family protein	2.55	4.6	2.29	2.11	1.08	1.01	1.6	0.74	1.5	0.00075	Up
AT1G30515		2.43	3.07	3.23	1.54	0.96	1.31	0.79	0.68	1.5	0.011	Up
AT1G73410	myb domain protein 54	2.42	4.28	4.29	3.14	1.43	1.18	1.79	0.83	1.5	0.0002	Up
AT2G01210	Leucine-rich repeat protein kinase family protein	1.95	3.97	3.63	2.28	0.92	1.51	1.28	0.73	1.5	0.00061	Up
AT5G50120	Transducin/WD40 repeat-like superfamily protein	1.94	2.38	0.49	1.54	0.48	0.61	0.83	0.39	1.5	0.029	Up
AT4G34220	Leucine-rich repeat protein kinase family protein	1.88	3.26	1.48	1.42	0.79	1.13	0.85	0.25	1.5	0.012	Up
AT5G49120	Protein of unknown function (DUF581)	1.73	2.49	2.51	2.25	1.04	0.76	1.19	0.39	1.5	0.0089	Up
AT1G05370	Sec14p-like phosphatidylinositol transfer family protein	1.44	1.69	1.46	1.42	0.33	0.63	0.82	0.49	1.5	0.00012	Up
AT1G11915		1.41	1.8	1.32	0.88	0.55	0.6	0.42	0.46	1.5	0.0042	Up
AT3G58650		1.27	1.35	0.8	0.38	0.29	0.27	0.51	0.36	1.5	0.013	Up
AT5G60930	P-loop containing nucleoside triphosphate hydrolases superfamily protein	1.21	1.43	0.86	0.48	0.54	0.29	0.33	0.35	1.5	0.0016	Up
AT4G13710	Pectin lyase-like superfamily protein	1.07	2.78	1.06	0.91	0.47	0.37	0.93	0.37	1.5	0.013	Up
AT5G23910	ATP binding microtubule motor family protein	0.78	1.41	0.84	0.44	0.13	0.35	0.54	0.29	1.5	0.021	Up
AT2G19920	RNA-dependent RNA polymerase family protein	0.77	1.09	0.7	0.57	0.32	0.48	0.18	0.2	1.5	0.0036	Up
AT5G44635	minichromosome maintenance (MCM2/3/5) family protein	0.71	1.02	0.32	0.35	0.24	0.41	0.15	0.1	1.5	0.047	Up
AT4G16015	Cysteine/Histidine-rich C1 domain family protein	0.64	0.67	0.6	0.44	0.06	0.29	0.23	0.23	1.5	0.037	Up
AT5G55820		0.64	0.41	0.32	0.27	0.25	0.15	0.08	0.16	1.5	0.0064	Up
AT1G12600	UDP-N-acetylglucosamine (UAA) transporter family	0.3	0.56	0.49	0.31	0.04	0.22	0.12	0.2	1.5	0.046	Up
AT4G34050	S-adenosyl-L-methionine-dependent methyltransferases superfamily protein	1687.47	2073.51	1966.29	1849.16	483.5	681.41	1200.09	568.53	1.4	8.6e-06	Up
AT5G64040	photosystem I reaction center subunit PSI-N, chloroplast, putative / PSI-N, putative (PSAN)	392.94	517.91	276.08	216.89	136.01	167.29	172.75	88.85	1.4	0.00017	Up
AT4G14960	Tubulin/FtsZ family protein	314.57	531.66	313.89	221.59	123.97	129.64	175.34	133.25	1.4	2.5e-05	Up
AT2G44160	methylenetetrahydrofolate reductase 2	285.73	375.54	362.34	332.36	88.25	129.84	232.21	100.76	1.4	9.5e-05	Up
AT5G14740	carbonic anhydrase 2	142.74	201.46	119.19	82.4	47.2	53.97	83.04	29.3	1.4	0.00062	Up
AT3G09820	adenosine kinase 1	141.3	188.96	139.96	114.93	42.62	57.08	81.39	59.31	1.4	1.8e-06	Up
AT4G14040	selenium-binding protein 2	122.77	80.86	149.75	82.36	40.96	50.43	21.44	64.36	1.4	0.00037	Up
AT1G27440	Exostosin family protein	97.49	167.68	189.87	157.5	31.73	58.7	111.55	46	1.4	0.0019	Up
AT3G23090	TPX2 (targeting protein for Xklp2) protein family	81.44	104.99	100.25	85.67	18.41	33.56	69.44	21.38	1.4	0.0015	Up
AT5G61340		81.2	106.48	97.98	80.01	23.21	31.39	65.11	27.58	1.4	0.0003	Up
AT5G03300	adenosine kinase 2	79.96	110.22	79.82	65.72	27.11	30.98	43.95	29.71	1.4	1e-07	Up
AT1G32770	NAC domain containing protein 12	77.31	76.52	69.42	68.87	19.14	27.77	42.58	22.51	1.4	4.9e-07	Up
AT1G21440	Phosphoenolpyruvate carboxylase family protein	75.18	41.08	55.86	36.23	19.6	26.76	7.24	31.19	1.4	0.0042	Up
AT4G36890	Nucleotide-diphospho-sugar transferases superfamily protein	70.48	114.89	103.16	81.13	27.91	35.42	51.49	31.93	1.4	9.9e-07	Up
AT5G11790	N-MYC downregulated-like 2	68.86	99.19	95.64	78.56	20.35	31.88	56.85	25.69	1.4	0.00012	Up
AT3G52500	Eukaryotic aspartyl protease family protein	62.32	83.62	48.94	34.71	18.91	21.19	27.04	22.39	1.4	1.2e-05	Up
AT1G75690	DnaJ/Hsp40 cysteine-rich domain superfamily protein	52.44	76.77	37.56	28.79	24.21	20.21	18.69	14.98	1.4	0.00015	Up
AT4G35320		48.83	105.83	89.96	71.05	20.45	31.39	49.37	24.69	1.4	0.00039	Up
AT3G61750	Cytochrome b561/ferric reductase transmembrane with DOMON related domain	45.95	78.25	65.9	57.85	10	23.37	46.16	19.05	1.4	0.004	Up
AT2G23340	DREB and EAR motif protein 3	42.03	26.42	26.11	20.71	9.05	12.5	15.43	7.95	1.4	4.2e-05	Up
AT1G73640	RAB GTPase homolog A6A	37.53	57.99	45.79	35.48	13.19	17.82	27.48	9.94	1.4	0.00018	Up
AT2G43550	Scorpion toxin-like knottin superfamily protein	34.31	22.83	30.18	15.16	6.89	8.47	4.31	22.05	1.4	0.02	Up
ATCG00690	photosystem II reaction center protein T	33.49	69.27	69.15	56.28	20.71	23.01	25.35	21.43	1.4	0.00019	Up
AT3G15040	Protein of unknown function, DUF584	30.85	46.05	39.18	34.86	11.29	12.96	24.36	11.95	1.4	2.8e-05	Up
AT5G65020	annexin 2	29.54	32.32	21.17	15.96	8.94	8.41	10.21	12.36	1.4	7.9e-06	Up
AT1G12000	Phosphofructokinase family protein	28.92	38.38	29.25	27.25	9.06	11.56	17.79	11.04	1.4	6.3e-07	Up
AT3G57420	Protein of unknown function (DUF288)	28.07	39.9	33.44	27.24	8.69	13.65	18.4	11.41	1.4	4.7e-06	Up
AT1G69080	Adenine nucleotide alpha hydrolases-like superfamily protein	24.95	37.71	26.51	26.57	10.67	13.53	14.16	8.06	1.4	6.3e-07	Up
AT1G12500	Nucleotide-sugar transporter family protein	24.88	48.77	28.24	21.85	10.14	12.2	17.84	10.13	1.4	0.00022	Up
AT3G22070	proline-rich family protein	24.68	36.19	36.01	31.46	8.24	10.52	22.08	11.43	1.4	0.00033	Up
AT3G25500	formin homology 1	22.56	25.55	17.27	13.58	5.43	7.16	10.72	8.42	1.4	2.3e-05	Up
AT2G26730	Leucine-rich repeat protein kinase family protein	20.69	44.61	20.66	16.99	9.92	10.54	11.78	9.97	1.4	0.00022	Up
AT2G42220	Rhodanese/Cell cycle control phosphatase superfamily protein	18.97	25.66	7.35	7.14	5.16	7.66	6.23	4.52	1.4	0.0077	Up
AT2G22250	aspartate aminotransferase	18.83	28.55	21.77	21.15	7.44	9.24	12.79	7.48	1.4	7.1e-07	Up
AT3G07540	Actin-binding FH2 (formin homology 2) family protein	18.6	13.51	9.74	11.76	4.44	5.32	8.06	3.54	1.4	7.7e-05	Up
AT1G31070	N-acetylglucosamine-1-phosphate uridylyltransferase 1	18.51	33.58	24.25	15.61	7.44	9.18	12.1	8.44	1.4	2.8e-05	Up
AT5G35740	Carbohydrate-binding X8 domain superfamily protein	18.23	38.42	37.5	25.26	3.11	11.92	20.88	12.01	1.4	0.019	Up
AT3G02250	O-fucosyltransferase family protein	17.08	29.06	21.98	18.41	6.29	8.35	11.48	8.36	1.4	2.1e-06	Up
AT3G12955	SAUR-like auxin-responsive protein family	17.05	26.71	18.21	14.32	4.06	7.47	13.39	5	1.4	0.0035	Up
AT1G58170	Disease resistance-responsive (dirigent-like protein) family protein	15.74	22.35	20.27	16.46	5.96	8.94	7.47	7.28	1.4	5.7e-08	Up
AT1G68230	Reticulon family protein	15.39	18.11	15.43	14.18	4.91	6.93	7.69	5.44	1.4	4.5e-08	Up
AT5G11890		15.24	24.07	12.6	12.69	5.1	7.6	7.4	6.21	1.4	3.7e-05	Up
AT1G78060	Glycosyl hydrolase family protein	14.23	19.24	10.29	8.92	3.94	5.19	7.57	4.51	1.4	0.00017	Up
AT1G78210	alpha/beta-Hydrolases superfamily protein	13.63	19.78	16.94	11.03	5.27	5.73	5.79	7.65	1.4	8.6e-07	Up
AT1G53290	Galactosyltransferase family protein	13.41	16.54	11.06	9.86	4.22	3.91	8.9	3.74	1.4	0.00059	Up
AT5G60720	Protein of unknown function, DUF547	13.16	20.26	16.81	15.52	3.29	6.05	11.54	5.35	1.4	0.00085	Up
AT2G28410		13.03	33.87	14.79	13.7	7.37	6.27	12.93	3.7	1.4	0.012	Up
AT5G05580	fatty acid desaturase 8	13.01	12.1	8	8.91	3.21	3.98	6.69	2.98	1.4	0.00014	Up
AT5G01640	prenylated RAB acceptor 1.B5	12.95	10.92	9.62	8.34	2.63	3.27	5.26	5.91	1.4	0.0003	Up
AT5G14790	ARM repeat superfamily protein	12.84	16.92	12.08	8.75	3.9	4.57	6.55	4.71	1.4	3.4e-06	Up
ATCG00300	YCF9	12.59	26.43	33.59	17.74	15.43	9.62	5.54	6.43	1.4	0.012	Up
AT4G39190		11.25	13.11	12.29	9.5	3.98	5.44	6.19	3.27	1.4	4.9e-06	Up
AT3G61910	NAC domain protein 66	11.12	20.51	18.59	19.84	4.06	6.74	12.34	4.1	1.4	0.002	Up
AT5G57830	Protein of unknown function, DUF593	10.87	9.12	7.75	7.98	1.77	4.23	4.01	3.81	1.4	1.4e-05	Up
AT4G38660	Pathogenesis-related thaumatin superfamily protein	10.04	14.98	9.65	7.69	2.43	4.54	6.77	3.47	1.4	0.001	Up
AT1G67950	RNA-binding (RRM/RBD/RNP motifs) family protein	9.31	13.37	8.12	5.08	1.72	4.3	4.71	3.93	1.4	0.0035	Up
AT2G39800	delta1-pyrroline-5-carboxylate synthase 1	8.81	19.03	5.31	5.78	4.47	4.18	4.04	2.92	1.4	0.0035	Up
AT3G53750	actin 3	8.6	21.04	8.46	4.16	3.38	4.01	5.55	4.33	1.4	0.012	Up
AT3G12920	SBP (S-ribonuclease binding protein) family protein	7.95	12.07	10.52	9.88	3.53	4.55	4.66	3.47	1.4	2.8e-08	Up
AT5G47550	Cystatin/monellin superfamily protein	7.82	29.02	7.59	5.08	5.53	3.33	5.07	5.78	1.4	0.041	Up
AT1G64640	early nodulin-like protein 8	7.56	31.54	9.96	6.72	5.85	4.83	5.2	6.33	1.4	0.02	Up
AT3G20860	NIMA-related kinase 5	7.15	6.27	6.28	6.37	2.42	2.1	3.71	2.36	1.4	1e-07	Up
AT1G16920	RAB GTPase homolog A1B	7.12	9	4.55	3.59	2.25	2.44	2.69	2.56	1.4	0.00051	Up
AT1G19190	alpha/beta-Hydrolases superfamily protein	6.53	11.27	8.32	7.78	3.56	2.56	5.14	2.2	1.4	0.00042	Up
AT1G78120	Tetratricopeptide repeat (TPR)-like superfamily protein	6.42	7.24	4.76	4.5	1.36	2.68	3.98	1.39	1.4	0.0039	Up
AT4G35970	ascorbate peroxidase 5	6.18	8.96	6.11	5.2	3.1	3.34	2.77	1.62	1.4	0.0001	Up
AT5G15960	stress-responsive protein (KIN1) / stress-induced protein (KIN1)	6.03	3.87	1.91	2.18	1.7	1.84	0.82	1.17	1.4	0.02	Up
AT1G47380	Protein phosphatase 2C family protein	6.02	6.17	3.86	3.24	1.36	2.16	2.02	2.39	1.4	0.00011	Up
AT5G23360	GRAM domain-containing protein / ABA-responsive protein-related	5.99	8.64	4.05	4.31	1.89	3.25	1.29	2.98	1.4	0.0058	Up
AT2G45750	S-adenosyl-L-methionine-dependent methyltransferases superfamily protein	5.77	6.85	4.06	2.91	1.27	2.12	2.42	2.2	1.4	0.00069	Up
AT5G67090	Subtilisin-like serine endopeptidase family protein	5.27	8.81	6.54	6	2.16	2.64	3.58	2.02	1.4	8.1e-06	Up
AT1G80690	PPPDE putative thiol peptidase family protein	5.13	8.43	3	2.08	1.97	1.99	1.99	1.78	1.4	0.011	Up
AT1G32760	Glutaredoxin family protein	4.9	5.41	3.99	3.34	1.77	1.19	1.93	2.08	1.4	0.00017	Up
AT2G27035	early nodulin-like protein 20	4.67	7	3.37	3.39	0.96	2.11	2.21	2.18	1.4	0.0063	Up
AT5G25590	Protein of unknown function (DUF630 and DUF632)	4.41	4.9	3.13	3.34	1.85	1.82	1.69	1.17	1.4	3.4e-06	Up
AT5G27330	Prefoldin chaperone subunit family protein	4.28	2.13	2.48	1.39	0.49	0.98	0.86	1.6	1.4	0.0097	Up
AT1G23750	Nucleic acid-binding, OB-fold-like protein	4.24	4.32	2.51	2.8	0.38	2.06	1.89	1.27	1.4	0.018	Up
AT1G75060		4.24	3.59	2.14	2.58	1.67	1.11	1.27	0.95	1.4	0.00015	Up
AT4G20970	basic helix-loop-helix (bHLH) DNA-binding superfamily protein	4.16	6.51	5.91	4.46	1.79	2.4	2.13	1.97	1.4	4.6e-05	Up
AT2G23700	Protein of unknown function, DUF547	4.14	4.95	3.22	2.6	1.12	1.43	2.14	1.3	1.4	0.00012	Up
AT4G02100	Heat shock protein DnaJ with tetratricopeptide repeat	4.06	4.31	2.53	2.36	1.78	1.19	1.39	1.15	1.4	0.00022	Up
AT3G26320	cytochrome P450, family 71, subfamily B, polypeptide 36	4.03	3.52	2.73	1.92	1.2	0.63	1.39	1.81	1.4	0.0057	Up
AT3G28860	ATP binding cassette subfamily B19	3.61	10.31	2.96	2.69	2.25	1.97	2.07	1.64	1.4	0.007	Up
AT3G08500	myb domain protein 83	3.57	3.39	2.37	2.62	0.62	1.01	1.44	1.46	1.4	0.00047	Up
AT2G33400		3.38	3.21	1.5	1.1	0.88	1.19	0.81	0.87	1.4	0.013	Up
AT5G14470	GHMP kinase family protein	3.32	3.12	4.28	3.2	1.74	0.79	2.16	0.95	1.4	0.0012	Up
AT1G49580	Calcium-dependent protein kinase (CDPK) family protein	3.24	4.79	2.82	2.73	0.73	1.87	1.5	1.25	1.4	0.00041	Up
AT1G12260	NAC 007	3.19	3.4	2.01	2.22	1.03	1.07	1.53	0.58	1.4	0.0005	Up
AT4G29920	Double Clp-N motif-containing P-loop nucleoside triphosphate hydrolases superfamily protein	3.17	3.93	2.45	1.76	1.56	1.09	1.14	0.85	1.4	0.0004	Up
AT4G20430	Subtilase family protein	3.02	4.44	2.99	2.4	0.66	1.57	1.69	1.13	1.4	0.00049	Up
AT1G23060		2.92	2.49	2.4	2.56	1.89	0.79	0.52	1.11	1.4	0.0018	Up
AT5G42690	Protein of unknown function, DUF547	2.7	5.15	3.54	2.97	0.59	1.19	2.49	1.46	1.4	0.0065	Up
AT1G75090	DNA glycosylase superfamily protein	2.41	5.14	3.06	2.24	0.93	1.29	2	0.77	1.4	0.0045	Up
AT1G22490	basic helix-loop-helix (bHLH) DNA-binding superfamily protein	2.34	1.16	0.98	0.94	0.82	0.4	0.24	0.73	1.4	0.023	Up
AT1G77270		2.16	5.66	3.9	2.65	0.43	1.14	3	0.97	1.4	0.034	Up
AT5G40390	Raffinose synthase family protein	2.16	2.66	1.84	1.26	0.52	1.11	0.69	0.85	1.4	0.00075	Up
AT5G37010		2.13	3.07	1.6	1.28	0.77	1.06	0.7	0.63	1.4	0.0021	Up
AT5G20635		2.11	2.39	2.23	2.96	0.59	1.25	1.58	0.42	1.4	0.0057	Up
AT5G66600	Protein of unknown function, DUF547	2.06	3.39	2.33	2.58	1	0.67	1.13	1.24	1.4	1.6e-05	Up
AT1G19950	HVA22-like protein H (ATHVA22H)	1.97	4.02	2.67	1.88	1.27	0.67	1.36	0.84	1.4	0.0015	Up
AT5G51460	Haloacid dehalogenase-like hydrolase (HAD) superfamily protein	1.97	2.6	1.88	1.68	0.54	1	0.73	0.99	1.4	5.8e-05	Up
AT1G33475	SNARE-like superfamily protein	1.88	2.27	1.63	1.66	1.24	0.18	1.01	0.62	1.4	0.041	Up
AT4G24180	THAUMATIN-LIKE PROTEIN 1	1.81	3.18	1.03	1.64	0.53	0.62	1.11	0.71	1.4	0.028	Up
AT3G05400	Major facilitator superfamily protein	1.78	7.31	5.19	2.63	1.16	1.39	2.56	1.51	1.4	0.01	Up
AT5G01830	ARM repeat superfamily protein	1.63	3.09	1.71	1.54	0.45	0.81	0.75	1.08	1.4	0.0023	Up
AT4G30980	LJRHL1-like 2	1.59	0.95	0.55	0.61	0.21	0.34	0.64	0.25	1.4	0.039	Up
AT4G30230		1.58	2.64	2.61	2.8	0.56	0.6	1.77	0.9	1.4	0.019	Up
AT1G23760	BURP domain-containing protein	1.51	0.89	0.63	0.54	0.22	0.39	0.52	0.24	1.4	0.028	Up
AT5G51600	Microtubule associated protein (MAP65/ASE1) family protein	1.33	3.02	2.12	1.46	0.53	0.8	1.27	0.63	1.4	0.0054	Up
AT1G69400	Transducin/WD40 repeat-like superfamily protein	1.18	1.07	1.62	0.9	0.19	0.79	0.36	0.47	1.4	0.012	Up
AT4G33260	Transducin family protein / WD-40 repeat family protein	1.12	1.73	0.59	0.7	0.55	0.52	0.36	0.25	1.4	0.022	Up
AT5G40210	nodulin MtN21 /EamA-like transporter family protein	1.12	1.4	0.49	0.62	0.16	0.49	0.27	0.49	1.4	0.033	Up
AT3G06030	NPK1-related protein kinase 3	1.07	1.34	1.12	0.96	0.32	0.5	0.45	0.46	1.4	2e-05	Up
AT5G67550		1.01	1.81	1.03	1.1	0.08	0.78	0.66	0.43	1.4	0.042	Up
AT1G21060	Protein of unknown function, DUF547	0.97	0.55	0.58	0.63	0.16	0.14	0.55	0.2	1.4	0.047	Up
AT1G11160	Transducin/WD40 repeat-like superfamily protein	0.38	0.37	0.55	0.13	0.08	0.18	0.17	0.13	1.4	0.034	Up
AT5G38410	Ribulose bisphosphate carboxylase (small chain) family protein	3823.06	5331.83	3216.28	2731.19	1862.48	1524.45	2204.61	1006.55	1.3	0.0002	Up
AT2G34420	photosystem II light harvesting complex gene B1B2	1719.78	1557.14	940.57	865.78	683.44	639.73	518.3	342.17	1.3	0.00016	Up
AT3G16920	chitinase-like protein 2	1262.7	1701.31	1702.13	1590.69	376	611.55	1235.51	518.74	1.3	0.0017	Up
AT1G55670	photosystem I subunit G	1203.57	1381.54	833.52	710.52	464.91	485.78	542.5	295.7	1.3	5.7e-05	Up
AT5G17920	Cobalamin-independent synthase family protein	858.87	1149.57	989.74	846.29	258.83	364.75	627.08	349.16	1.3	3.1e-05	Up
AT1G55330	arabinogalactan protein 21	609	1029.58	511.04	478.05	142.05	326.2	399.02	290.41	1.3	0.003	Up
AT1G51680	4-coumarate:CoA ligase 1	594.84	813.11	847.37	802.01	204.67	284.71	540.16	232.46	1.3	0.00018	Up
AT5G44030	cellulose synthase A4	344.46	471.83	476.08	433.54	75.46	160.68	350.87	123.46	1.3	0.0053	Up
AT1G15820	light harvesting complex photosystem II subunit 6	333.14	439.75	217.58	185.6	144.05	151.84	130.38	91.18	1.3	0.00033	Up
AT3G50220	Protein of unknown function (DUF579)	245.68	317.77	327.49	302.43	70.86	119.59	216.93	94.11	1.3	0.00051	Up
AT5G54270	light-harvesting chlorophyll B-binding protein 3	236.75	233.6	108.44	92.46	91.28	78.68	68.42	59.7	1.3	0.0015	Up
AT4G27435	Protein of unknown function (DUF1218)	222.62	302.89	312.2	297.38	71.85	115.9	195.22	100.35	1.3	0.00016	Up
AT1G16410	cytochrome p450 79f1	204.63	105.2	242.06	138	69.99	91.35	19.69	122.1	1.3	0.023	Up
AT3G13750	beta galactosidase 1	162.91	110.73	74.48	77.81	40.9	46.45	57.04	41.13	1.3	5.4e-05	Up
AT3G03150		153.26	181.92	141.13	139.47	47.43	63.21	96.96	55.37	1.3	4e-06	Up
AT1G01120	3-ketoacyl-CoA synthase 1	127.65	141.38	126.98	101.65	40.2	54.5	64.88	57.91	1.3	1.6e-08	Up
ATCG00490	ribulose-bisphosphate carboxylases	118.44	296.92	301.91	132.53	166.05	80.63	56.62	69.71	1.3	0.01	Up
AT3G02020	aspartate kinase 3	118.29	55.64	110.28	66.3	38.89	51.9	8.4	54.14	1.3	0.028	Up
AT3G26060	Thioredoxin superfamily protein	110.4	168.99	88.74	77.1	35.08	54.38	56.05	40.23	1.3	7.7e-05	Up
AT1G52220		104.66	143.18	82.15	62.95	43.21	48.07	50.72	32	1.3	0.00015	Up
AT3G51325	RING/U-box superfamily protein	94.19	125.2	106.2	104.16	29.01	44.84	83.44	30.36	1.3	0.0016	Up
AT1G08340	Rho GTPase activating protein with PAK-box/P21-Rho-binding domain	86.6	105.87	106.25	90.99	21.86	35.68	76.49	27.3	1.3	0.0018	Up
AT1G21520		65.12	15.49	10.26	16.02	15.82	9.32	7.07	12.22	1.3	0.048	Up
AT2G36910	ATP binding cassette subfamily B1	58.69	73.39	45.26	42.51	19.01	23.97	28.4	22.65	1.3	9.7e-07	Up
AT3G23450		55.49	128.51	64.34	65.12	11.88	49.41	46.58	23.21	1.3	0.013	Up
AT3G19450	GroES-like zinc-binding alcohol dehydrogenase family protein	55.03	65.75	58.01	57.18	15.72	23.65	40.33	19.72	1.3	6.9e-05	Up
AT4G32330	TPX2 (targeting protein for Xklp2) protein family	53.62	60.6	39.38	35.86	16.99	21.68	23.54	21.35	1.3	8.4e-07	Up
AT5G07690	myb domain protein 29	48.18	35.88	51.66	28.81	14.07	26.6	6.54	22.59	1.3	0.0045	Up
AT5G26667	P-loop containing nucleoside triphosphate hydrolases superfamily protein	47.12	81.85	46.85	37.85	22.02	22.85	23.49	21.15	1.3	6.2e-06	Up
AT2G22990	sinapoylglucose 1	44.11	32.77	18.37	16.98	15.93	8.78	13.63	8.58	1.3	0.0012	Up
AT5G18690	arabinogalactan protein 25	42.11	72.09	39.34	40.78	17.4	22.43	29.27	16.15	1.3	0.00027	Up
AT1G04430	S-adenosyl-L-methionine-dependent methyltransferases superfamily protein	38.53	44.08	20.3	15.04	10.56	12.8	12.66	16.31	1.3	0.0025	Up
AT5G06290	2-cysteine peroxiredoxin B	37.65	69.34	29.88	20.31	19.86	15.54	15.94	16.55	1.3	0.0018	Up
AT2G41610		37.62	58.91	54.38	45.38	7.89	21.83	43.21	11.94	1.3	0.023	Up
AT4G09010	ascorbate peroxidase 4	36.88	35.68	17.92	16.26	13.29	12.81	10.73	8.23	1.3	0.00042	Up
AT1G19170	Pectin lyase-like superfamily protein	34.61	50.09	43.75	38.33	12.75	14.99	31.6	13.42	1.3	0.00067	Up
AT1G74690	IQ-domain 31	32	42.9	31.38	25.34	11.4	13.2	18.81	13.73	1.3	2.6e-06	Up
AT4G28380	Leucine-rich repeat (LRR) family protein	31.33	48.37	65.15	64.71	11.8	19.21	45.4	10.22	1.3	0.017	Up
AT3G23805	ralf-like 24	31.27	64.6	33.7	29.62	12.07	15.47	27.37	13.41	1.3	0.0031	Up
AT4G34610	BEL1-like homeodomain 6	27.38	46.77	34.66	24.13	13.84	14.55	18.27	11.97	1.3	2.3e-05	Up
AT3G45870	nodulin MtN21 /EamA-like transporter family protein	25.18	36.08	32.2	28.79	10.15	11.39	21.03	10	1.3	8.8e-05	Up
AT5G60860	RAB GTPase homolog A1F	22.62	26.66	17.98	13.86	8.54	7.58	9.66	9.8	1.3	1.9e-05	Up
AT5G25830	GATA transcription factor 12	22.35	32.45	24.23	23.74	8.54	9.57	16.14	9.08	1.3	1.8e-05	Up
AT3G11690		22.26	19.72	17.86	20.46	7.62	8.54	13.38	5.21	1.3	8.2e-05	Up
AT2G01950	BRI1-like 2	21.8	24.29	17.14	15.41	6.88	7.83	13.02	4.79	1.3	0.00025	Up
AT2G04850	Auxin-responsive family protein	20.51	33.44	25.93	25.74	5.85	11.26	18.85	8.93	1.3	0.0015	Up
AT3G09070	Protein of unknown function (DUF740)	19.77	17.79	10.95	11.36	7.2	6.72	6.07	5.25	1.3	3.5e-06	Up
AT3G05910	Pectinacetylesterase family protein	19.58	27.46	12.44	9.67	5.91	7.3	6.75	9.36	1.3	0.00099	Up
ATCG00470	ATP synthase epsilon chain	19.11	37.38	24.31	14.55	13.11	6.76	11.11	10.65	1.3	0.0035	Up
AT2G40200	basic helix-loop-helix (bHLH) DNA-binding superfamily protein	18.98	9.85	10.92	7.79	3.44	5.02	8.31	3.3	1.3	0.0063	Up
AT1G52140		18.76	19.38	13.56	12.31	9.6	6.98	6.5	5.38	1.3	3.6e-05	Up
AT3G14240	Subtilase family protein	17.41	25.85	11.67	9.63	5.55	6.5	7.85	7.65	1.3	0.00073	Up
AT3G08920	Rhodanese/Cell cycle control phosphatase superfamily protein	17.11	17.74	11.94	12.79	6.52	6.24	7.98	4.05	1.3	1.6e-05	Up
AT1G31720	Protein of unknown function (DUF1218)	15	22.28	23.12	19.81	8.42	8.2	12.13	4.9	1.3	0.00011	Up
AT5G12300	Calcium-dependent lipid-binding (CaLB domain) family protein	14.48	10.88	11.65	11.96	3.39	5.58	6.31	5.98	1.3	8.4e-07	Up
AT1G49010	Duplicated homeodomain-like superfamily protein	13.62	20.56	13.56	12.18	6.36	6.41	9.04	3.93	1.3	0.00027	Up
AT5G54240	Protein of unknown function (DUF1223)	13.44	21.26	20.79	18.91	5.35	7.12	11.99	6.3	1.3	9e-05	Up
AT5G64410	oligopeptide transporter 4	12.6	10.77	4.9	4	4.52	2.43	2.91	4.06	1.3	0.0065	Up
AT3G02930	Plant protein of unknown function (DUF827)	12.33	16.76	11.15	7.02	3.88	5.75	6.05	4.19	1.3	0.00015	Up
AT5G14510	ARM repeat superfamily protein	12.18	12.91	9.6	11.56	3.05	5.47	8.57	3.08	1.3	0.0029	Up
AT4G00230	xylem serine peptidase 1	11.54	12.39	7.94	8.2	3.79	4.35	5.98	3.25	1.3	2.6e-05	Up
AT2G46535		11.05	18.45	10.54	8.37	5.27	5.35	4.77	5.05	1.3	0.00017	Up
ATCG00530	CemA-like proton extrusion protein-related	10.96	18.62	14.44	9.16	9.48	5.36	2.32	5.54	1.3	0.0084	Up
AT3G13650	Disease resistance-responsive (dirigent-like protein) family protein	10.76	15.79	6.29	5	2.15	3.77	4.83	5.39	1.3	0.017	Up
AT3G43430	RING/U-box superfamily protein	10.54	10.47	3.78	4.77	3.4	2.74	3.92	2.52	1.3	0.01	Up
AT5G10400	Histone superfamily protein	10.47	17.52	7.3	4.18	4.7	4.77	3.43	3.84	1.3	0.015	Up
AT3G51720	Plant protein of unknown function (DUF827)	10.44	12.71	7.12	5.01	2.54	4.7	3.89	3.6	1.3	0.0012	Up
AT4G34970	actin depolymerizing factor 9	10.34	14.6	8.61	11.6	2.84	5.48	7.7	2.96	1.3	0.0026	Up
AT1G18840	IQ-domain 30	10.28	18.81	13.23	9.84	3.36	6.04	7.77	5.01	1.3	0.00047	Up
AT1G28100		10.2	7.6	6.07	5.18	2.1	3.45	4.54	2.58	1.3	0.00061	Up
AT3G20670	histone H2A 13	10.06	13.41	8.34	5.32	6.93	3.41	3.74	2.38	1.3	0.011	Up
AT5G01730	SCAR family protein 4	9.99	7.14	4.06	4.28	1.98	2.39	3.66	2.7	1.3	0.0011	Up
AT1G62800	aspartate aminotransferase 4	9.47	11.16	9.61	7.48	3.32	4.29	3.91	4.46	1.3	2.1e-09	Up
AT5G45940	nudix hydrolase homolog 11	9.22	19.07	10.78	7.66	3.95	4.92	5.97	4.77	1.3	0.00095	Up
AT1G32740	SBP (S-ribonuclease binding protein) family protein	9.16	13	10.61	9.65	2.46	4.43	7.7	3.34	1.3	0.0019	Up
AT3G21770	Peroxidase superfamily protein	8.93	4.34	5.13	4.49	2.83	2.03	2.52	2.37	1.3	0.0002	Up
AT2G47750	putative indole-3-acetic acid-amido synthetase GH3.9	8.88	7.92	6.16	6.46	2.49	3.81	3.74	2.2	1.3	3.2e-06	Up
AT2G15680	Calcium-binding EF-hand family protein	8.86	8.05	5.18	10.67	1.4	5.26	2.66	4.88	1.3	0.016	Up
AT4G09950	P-loop containing nucleoside triphosphate hydrolases superfamily protein	8.53	9.11	6.88	6.24	3.11	4.05	3.26	2.74	1.3	1.3e-06	Up
AT4G01900	GLNB1 homolog	8.36	7.88	4.51	2.67	2.52	2.62	2.54	2.44	1.3	0.0041	Up
AT4G18425	Protein of unknown function (DUF679)	8.31	8.76	6.23	5.27	2.87	3.49	4.35	1.51	1.3	0.004	Up
AT5G67230	Nucleotide-diphospho-sugar transferases superfamily protein	7.68	14.03	9	4.67	5.6	2.98	2.86	3.74	1.3	0.0033	Up
AT1G08280	Glycosyltransferase family 29 (sialyltransferase) family protein	7	16.24	13.48	8.61	4.1	5.15	5.49	4.41	1.3	0.00034	Up
AT5G06710	homeobox from Arabidopsis thaliana	6.93	5.13	2.46	2.05	1.09	1.99	2.33	1.61	1.3	0.016	Up
AT5G22200	Late embryogenesis abundant (LEA) hydroxyproline-rich glycoprotein family	6.9	9.16	8.27	7.74	1.7	2.78	6.71	1.95	1.3	0.011	Up
AT1G07410	RAB GTPase homolog A2B	6.64	10.04	5.2	4.21	3.1	3.03	2.63	2.42	1.3	0.0012	Up
AT1G70210	CYCLIN D1;1	6.56	11.26	7.22	5.85	2.98	3.17	5.19	1.7	1.3	0.0023	Up
AT5G24310	ABL interactor-like protein 3	6.53	12.09	6.42	4.93	2.83	3.09	4.5	2.26	1.3	0.0013	Up
AT2G23300	Leucine-rich repeat protein kinase family protein	6.17	6.85	4.3	4.81	2.47	2.05	2.93	2.36	1.3	6.8e-06	Up
AT3G24840	Sec14p-like phosphatidylinositol transfer family protein	6.17	11.14	8.26	7.1	2.55	3.56	4.57	3.42	1.3	3.6e-05	Up
AT4G22290	Ubiquitin-specific protease family C19-related protein	6.16	10.73	5.48	5.98	2.56	3.34	3.85	2.23	1.3	0.00021	Up
AT1G13170	OSBP(oxysterol binding protein)-related protein 1D	5.99	8.64	4.87	3.56	2.46	2.33	2.51	2.38	1.3	8.2e-05	Up
AT1G06540		5.66	11.73	10.06	6.99	4.86	1.36	5.72	2.7	1.3	0.027	Up
AT1G62540	flavin-monooxygenase glucosinolate S-oxygenase 2	5.29	8.09	6.29	4.95	1.92	2.59	3.58	2.17	1.3	2.6e-05	Up
AT4G31820	Phototropic-responsive NPH3 family protein	5.16	4.93	3.22	3.05	1.33	1.55	2.18	1.78	1.3	4.3e-05	Up
AT5G27920	F-box family protein	4.97	3.48	2.52	3.23	0.6	1.47	2.14	1.71	1.3	0.0044	Up
AT4G39510	cytochrome P450, family 96, subfamily A, polypeptide 12	4.91	7.72	6.91	4.6	2.94	2.63	3.66	1.38	1.3	0.0018	Up
AT2G23380	SET domain-containing protein	4.78	5.2	3.93	3.43	1.03	1.95	2.42	1.93	1.3	9.7e-05	Up
AT5G01620	TRICHOME BIREFRINGENCE-LIKE 35	4.46	6.61	3.26	2.66	1.97	1.62	1.96	1.63	1.3	0.00083	Up
AT1G29380	Carbohydrate-binding X8 domain superfamily protein	4.32	5.59	4.29	4.29	2.01	1.87	1.53	2.26	1.3	5.5e-07	Up
AT3G55940	Phosphoinositide-specific phospholipase C family protein	4.1	7.14	7.28	4.09	0.46	2.99	3.13	2.91	1.3	0.033	Up
AT3G52290	IQ-domain 3	4.06	5.3	4.02	3.47	1.44	1.86	2.12	1.57	1.3	2.2e-06	Up
AT1G54450	Calcium-binding EF-hand family protein	4.01	4.4	2.37	2.28	0.88	1.52	1.7	1.44	1.3	0.00098	Up
AT3G14360	alpha/beta-Hydrolases superfamily protein	3.9	2.69	2.52	2.8	0.77	1.79	1.44	1.1	1.3	0.00058	Up
AT1G23560	Domain of unknown function (DUF220)	3.74	3.81	2.89	3.44	1.34	1.32	1.72	1.55	1.3	6.2e-06	Up
AT5G64700	nodulin MtN21 /EamA-like transporter family protein	3.65	2.36	2.71	1.91	1.49	0.8	1.05	1.18	1.3	0.00072	Up
AT1G48280	hydroxyproline-rich glycoprotein family protein	3.6	3.83	3.12	3.04	1.15	1.58	2.41	0.69	1.3	0.0038	Up
AT5G46600	Aluminium activated malate transporter family protein	3.58	6.96	4.29	3.6	1.02	2.22	3.11	1.74	1.3	0.0064	Up
AT3G17730	NAC domain containing protein 57	3.57	2.93	2.03	1.71	1.05	1.43	1.12	0.85	1.3	0.0046	Up
AT3G03776	hydroxyproline-rich glycoprotein family protein	3.56	4.97	4.86	6.27	2.12	3.14	1.4	1.87	1.3	0.0047	Up
AT1G67590	Remorin family protein	3.49	5.61	4.21	4.02	1.08	2.18	3.21	0.99	1.3	0.012	Up
AT1G73210	Protein of unknown function (DUF789)	3.47	1.35	1	1.16	0.55	0.63	1.1	0.71	1.3	0.03	Up
AT5G22140	FAD/NAD(P)-binding oxidoreductase family protein	3.38	5.72	3.21	2.17	1.35	1.58	1.79	1.43	1.3	0.0024	Up
AT4G25850	OSBP(oxysterol binding protein)-related protein 4B	3.25	10.15	7.62	6.14	2.43	2.87	4.37	1.66	1.3	0.0045	Up
AT4G03340	Core-2/I-branching beta-1,6-N-acetylglucosaminyltransferase family protein	3.16	3.88	2.13	2.6	0.73	1.02	1.86	1.52	1.3	0.0037	Up
AT1G01130		3.04	4.45	3.01	1.76	1.16	0.92	1.55	1.78	1.3	0.0069	Up
AT1G16060	ARIA-interacting double AP2 domain protein	2.98	2.59	5.65	2.32	0.65	1.91	0.55	2.67	1.3	0.048	Up
AT3G54930	Protein phosphatase 2A regulatory B subunit family protein	2.86	2.6	2.63	1.77	0.72	1.06	1.25	1.01	1.3	0.00014	Up
AT5G22870	Late embryogenesis abundant (LEA) hydroxyproline-rich glycoprotein family	2.74	4.57	2.12	2.17	1.61	1.13	1.68	0.78	1.3	0.04	Up
AT4G21940	calcium-dependent protein kinase 15	2.62	2.7	2.38	1.46	0.48	0.71	1.52	1.07	1.3	0.0057	Up
AT2G23620	methyl esterase 1	2.3	1.98	1.43	1.31	0.74	1.17	0.42	0.67	1.3	0.008	Up
AT1G65920	Regulator of chromosome condensation (RCC1) family with FYVE zinc finger domain	2.12	3.42	1.6	1.23	0.65	1.08	0.95	0.81	1.3	0.0031	Up
AT1G70990	proline-rich family protein	2.11	4.67	2.26	1.65	1.42	1.2	0.95	1.17	1.3	0.035	Up
AT1G22230		2.08	4.02	2.31	1.79	0.88	0.98	1.46	1.06	1.3	0.01	Up
AT3G50660	Cytochrome P450 superfamily protein	2.06	3.47	2.19	1.66	0.36	1.08	1.31	1.23	1.3	0.012	Up
AT4G13370	Plant protein of unknown function (DUF936)	1.97	2.5	1.47	1.2	0.23	1.16	0.93	0.78	1.3	0.029	Up
AT4G13990	Exostosin family protein	1.86	4.53	3.94	3.11	0.53	2.07	1.56	1.57	1.3	0.018	Up
AT1G09470		1.82	0.81	0.72	0.79	0.27	0.5	0.39	0.52	1.3	0.022	Up
AT4G35190	Putative lysine decarboxylase family protein	1.72	1.67	1.74	1.93	0.72	0.63	0.78	0.87	1.3	0.00033	Up
AT5G01480	Cysteine/Histidine-rich C1 domain family protein	1.57	1.38	1.56	0.83	0.32	0.33	0.94	0.59	1.3	0.041	Up
AT2G28650	exocyst subunit exo70 family protein H8	1.42	0.75	0.79	0.68	0.48	0.34	0.36	0.45	1.3	0.025	Up
AT5G41470	Nuclear transport factor 2 (NTF2) family protein	1.4	1.68	1.36	1	0.62	0.22	1.03	0.49	1.3	0.044	Up
AT5G64330	Phototropic-responsive NPH3 family protein	1.39	4.08	1.34	1.26	1.23	1.11	0.51	0.72	1.3	0.038	Up
AT1G80850	DNA glycosylase superfamily protein	1.35	2.37	1.15	0.78	0.87	0.42	0.62	0.53	1.3	0.023	Up
AT5G56780	effector of transcription2	1.3	1.73	2.59	1.24	0.51	0.53	0.9	0.86	1.3	0.006	Up
AT1G77580	Plant protein of unknown function (DUF869)	1.29	2.75	1.49	0.65	0.68	0.81	0.71	0.51	1.3	0.023	Up
AT2G31270	homolog of yeast CDT1 A	1.25	2.23	1.25	1.1	0.71	0.42	0.63	0.75	1.3	0.0045	Up
AT2G44930	Plant protein of unknown function (DUF247)	0.88	2.62	1.82	1.3	0.95	0.79	0.41	0.68	1.3	0.017	Up
AT3G48010	cyclic nucleotide-gated channel 16	0.84	2.15	1.08	0.96	0.37	0.74	0.75	0.27	1.3	0.036	Up
AT3G20090	cytochrome P450, family 705, subfamily A, polypeptide 18	0.76	0.89	0.65	0.73	0.2	0.3	0.43	0.31	1.3	0.0065	Up
AT5G67100	DNA-directed DNA polymerases	0.76	0.95	0.5	0.48	0.27	0.26	0.29	0.3	1.3	0.00064	Up
AT4G13940	S-adenosyl-L-homocysteine hydrolase	909.92	1010.69	845.51	764.97	340.22	377.16	537.73	393.75	1.2	8e-08	Up
AT1G75280	NmrA-like negative transcriptional regulator family protein	848.3	1383.44	1412.49	1133.05	307.65	535.44	920.49	424.4	1.2	0.0026	Up
AT2G30490	cinnamate-4-hydroxylase	636.73	842.51	838.93	799.82	243.84	295.14	580.71	265.99	1.2	0.00024	Up
AT4G01850	S-adenosylmethionine synthetase 2	586.79	671.91	689.28	613.73	201.6	247.34	427.88	271.64	1.2	7.9e-06	Up
AT2G38080	Laccase/Diphenol oxidase family protein	451.73	516.72	520.66	487.13	141.03	188.38	373.96	173.1	1.2	0.00032	Up
AT1G08380	photosystem I subunit O	379.75	497.97	269.02	222.62	174.55	171.34	171.27	109.14	1.2	0.00031	Up
AT3G19710	branched-chain aminotransferase4	288.76	159.98	313.14	209.78	107.75	144.37	28.75	172.46	1.2	0.03	Up
AT2G35860	FASCICLIN-like arabinogalactan protein 16 precursor	181.29	293.82	291.22	249.18	66.66	99.97	212.67	88.85	1.2	0.005	Up
AT3G10340	phenylalanine ammonia-lyase 4	162.98	179.49	179.74	183.79	53.68	72.19	128.07	57.44	1.2	0.00011	Up
AT5G10430	arabinogalactan protein 4	147.97	346.8	211.06	172.87	71.91	95.06	162.05	89.07	1.2	0.0053	Up
AT5G23010	methylthioalkylmalate synthase 1	143.05	52.14	130.39	89.5	43.78	60.37	13.12	74.72	1.2	0.037	Up
ATCG01020	ribosomal protein L32	103.97	119.4	55.45	27.58	37.96	22.14	46.86	32.08	1.2	0.032	Up
AT2G18328	RAD-like 4	81.65	113.61	90.04	54.52	57.59	30.41	46.69	25.72	1.2	0.0021	Up
AT2G44210	Protein of Unknown Function (DUF239)	66.3	66.08	55.35	44.89	24.5	26.55	29.37	24.41	1.2	1.2e-09	Up
AT5G10550	global transcription factor group E2	58.28	51.89	40.52	40.66	25.21	23.17	22.71	18.23	1.2	1.1e-08	Up
AT2G02100	low-molecular-weight cysteine-rich 69	50.47	13.16	14.29	10.71	12.46	8.74	8.11	11.76	1.2	0.048	Up
AT1G06550	ATP-dependent caseinolytic (Clp) protease/crotonase family protein	44.84	68.99	56.6	52.61	16.57	25.75	37.09	20.91	1.2	0.00011	Up
AT3G59845	Zinc-binding dehydrogenase family protein	44.21	77.61	49.06	51.27	21.71	24.56	31.78	20.83	1.2	9.6e-06	Up
AT3G55360	3-oxo-5-alpha-steroid 4-dehydrogenase family protein	41.19	132.98	78.23	51.13	26.25	34.22	46.78	32.07	1.2	0.007	Up
AT5G06390	FASCICLIN-like arabinogalactan protein 17 precursor	28.92	54.58	42.13	34.62	9.14	16.76	29.03	16.39	1.2	0.0029	Up
AT1G08160	Late embryogenesis abundant (LEA) hydroxyproline-rich glycoprotein family	26.67	39.77	29.04	23.77	11.63	14.01	16.59	11.85	1.2	9.9e-06	Up
AT4G14760	kinase interacting (KIP1-like) family protein	26.01	28.76	28.99	25.9	9.38	11.67	19.17	11.45	1.2	1.8e-05	Up
AT1G30900	VACUOLAR SORTING RECEPTOR 6	24.69	32.38	29.99	27.03	10.62	10.98	19.27	11.57	1.2	1.1e-05	Up
AT5G17600	RING/U-box superfamily protein	24.04	23.43	20.86	25.65	10.81	10.29	13.97	7.66	1.2	1.6e-07	Up
AT4G35920	PLAC8 family protein	23.26	34.65	28.85	25.84	9.4	13.62	18.76	10.98	1.2	7.9e-05	Up
AT1G76800	Vacuolar iron transporter (VIT) family protein	20	15.16	18.72	25.2	10.16	9.07	11.74	4.63	1.2	0.00036	Up
AT5G57130	Clp amino terminal domain-containing protein	19.26	14.98	11.22	13.03	5.33	6.64	8.47	7.05	1.2	7.9e-06	Up
AT1G63310		18.56	26.48	16.75	17.88	5.55	13.56	10.99	6.24	1.2	0.0026	Up
AT2G17550		18.15	20.35	12.09	10.95	6.7	7.57	7.21	6.35	1.2	1.2e-05	Up
AT5G05160	Leucine-rich repeat protein kinase family protein	17.82	17.16	14.57	11.31	7.37	5.45	7.67	7.18	1.2	8.5e-07	Up
AT1G12380		17.27	30.3	22.36	19.45	8.2	10.87	12.72	7.87	1.2	2.1e-05	Up
AT2G35020	N-acetylglucosamine-1-phosphate uridylyltransferase 2	17.19	24.59	20.39	17.83	7.6	9.37	13.25	7.46	1.2	3.2e-05	Up
ATCG00480	ATP synthase subunit beta	17.11	30.03	22.15	14	12.7	8.47	8.8	8.11	1.2	0.0003	Up
AT2G21300	ATP binding microtubule motor family protein	16.58	23.62	16.73	17.56	6.37	8.48	11.37	6.91	1.2	5.1e-06	Up
AT3G55290	NAD(P)-binding Rossmann-fold superfamily protein	16.36	11.31	5.58	2.99	4.24	4.3	4.36	3.53	1.2	0.037	Up
AT3G15680	Ran BP2/NZF zinc finger-like superfamily protein	14.36	21.27	14.67	10.91	3.36	8.6	9.66	7.21	1.2	0.0063	Up
AT1G66150	transmembrane kinase 1	14.3	25.48	8.76	6.1	5.51	7.24	6.89	5.02	1.2	0.014	Up
AT3G50760	galacturonosyltransferase-like 2	13.54	9.25	10.15	5.08	3.81	2.36	5.32	6.49	1.2	0.017	Up
AT1G52827	cadmium tolerance 1	12.76	24.04	19.92	20.91	5.47	9.82	13.78	5.84	1.2	0.006	Up
AT5G27290		12.3	16.26	11.9	7.05	6.06	6.11	6.07	3.71	1.2	0.0007	Up
AT4G16750	Integrase-type DNA-binding superfamily protein	12.16	13.8	11.3	9.79	7.16	5.36	4.53	4.32	1.2	8.8e-06	Up
AT4G27840	SNARE-like superfamily protein	12.07	19.29	14.12	10.53	5.66	7.27	8.12	4.93	1.2	0.00031	Up
AT4G34160	CYCLIN D3;1	11.77	11.76	6.25	5.65	3.94	5.05	4.24	3.36	1.2	0.0017	Up
AT5G62670	H(+)-ATPase 11	11.66	11.48	9.14	8.05	3.68	4.76	6.39	3.55	1.2	2.3e-05	Up
AT2G46710	Rho GTPase activating protein with PAK-box/P21-Rho-binding domain	11.4	25.12	14.37	12.04	7.18	6.5	10.33	5.06	1.2	0.0024	Up
AT5G04160	Nucleotide-sugar transporter family protein	11.19	14.84	9.85	8.53	3.97	5.01	6.56	4.25	1.2	5.4e-05	Up
AT2G43340	Protein of unknown function (DUF1685)	11.02	17.38	7.46	6.66	6.54	5.39	4.64	2.63	1.2	0.011	Up
AT5G11410	Protein kinase superfamily protein	10.75	6.58	6.13	6.92	1.8	4.16	4.7	2.72	1.2	0.0023	Up
AT5G08370	alpha-galactosidase 2	10.59	16.13	9.21	8.86	4.93	5.56	6.54	3.8	1.2	0.00026	Up
AT5G58580	TOXICOS EN LEVADURA 63	10.59	14.63	15.69	14.12	2.28	8.1	9.3	5.7	1.2	0.012	Up
AT1G78820	D-mannose binding lectin protein with Apple-like carbohydrate-binding domain	10.58	13.94	8.87	8.05	3.69	5.66	7.18	2.84	1.2	0.0039	Up
AT3G25560	NSP-interacting kinase 2	10.49	19.38	14.38	15.03	4.69	7.4	9.09	5.9	1.2	0.00015	Up
AT5G48800	Phototropic-responsive NPH3 family protein	9.82	10.65	7.3	7.71	3.44	4.17	4.37	3.88	1.2	1.2e-07	Up
AT5G42780	homeobox protein 27	9.81	12.06	11.4	10.44	5.02	5.32	6.02	4.14	1.2	7.3e-07	Up
AT5G24420	6-phosphogluconolactonase 5	9.58	7.37	10.74	6.43	5.19	3.45	4.41	3.09	1.2	0.00012	Up
AT1G56210	Heavy metal transport/detoxification superfamily protein	9.53	13.3	10.62	8.17	4.23	4.82	6.18	3.85	1.2	4.5e-05	Up
ATCG00120	ATP synthase subunit alpha	9.01	20	21.06	11.34	12.87	4.58	5.74	4.86	1.2	0.014	Up
AT5G60840		8.63	6.88	5.79	5.28	3.6	3.65	2.41	2.43	1.2	0.00014	Up
AT5G05790	Duplicated homeodomain-like superfamily protein	8.62	11.71	9.26	8.99	4	5.64	4.35	3.46	1.2	3.2e-06	Up
AT2G28100	alpha-L-fucosidase 1	8.47	7.55	4.05	5.56	1.61	3.36	3.75	2.69	1.2	0.0024	Up
AT5G50420	O-fucosyltransferase family protein	8.44	12.65	8.55	6.33	3.34	4.32	4.32	4.08	1.2	3.6e-05	Up
AT4G16155	dihydrolipoyl dehydrogenases	8.41	12	8.19	7.3	3.45	3.79	5.24	3.79	1.2	1e-05	Up
AT4G25150	HAD superfamily, subfamily IIIB acid phosphatase	8.39	8.61	5.54	5.35	3.85	3.32	3.37	1.98	1.2	0.00034	Up
AT1G06830	Glutaredoxin family protein	8.21	12.86	8.73	7.54	3.39	7.44	3.66	3.13	1.2	0.015	Up
AT1G04330		7.9	10.09	9.32	9.21	4.04	5.68	3.85	2.98	1.2	0.00012	Up
AT2G42580	tetratricopetide-repeat thioredoxin-like 3	7.88	7.34	2.52	2.32	2.54	1.95	1.54	2.97	1.2	0.026	Up
AT4G14380		7.81	13.47	9.11	6.15	3.6	4.25	6.79	2.65	1.2	0.013	Up
AT3G52870	IQ calmodulin-binding motif family protein	7.76	6.33	6.95	3.63	2.51	3.19	2.04	3.19	1.2	0.00022	Up
AT2G41330	Glutaredoxin family protein	7.63	11.07	10.97	9.15	2.67	5.37	6.07	3.35	1.2	0.00067	Up
AT5G41060	DHHC-type zinc finger family protein	7.62	9.51	5.04	4.29	2.88	3.55	3.34	2.25	1.2	0.0011	Up
AT5G65440		7.62	9.2	5.11	4.53	2.39	3.04	3.74	3.04	1.2	0.00032	Up
ATCG00440	NADH:ubiquinone/plastoquinone oxidoreductase, chain 3 protein	7.56	12.78	9.23	3.91	4.16	2.59	4.92	3.35	1.2	0.031	Up
AT3G46890		7.51	7.52	6.71	8.43	2.3	2.16	6.41	2.39	1.2	0.012	Up
AT1G60790	Plant protein of unknown function (DUF828)	7.4	11.35	10.34	8.3	5.65	3.11	5.02	3.71	1.2	7.8e-05	Up
AT5G10410	ENTH/ANTH/VHS superfamily protein	7.33	3.86	5.42	4.4	1.97	2.46	3.12	1.76	1.2	0.00059	Up
AT1G03920	Protein kinase family protein	7.29	9.51	8.58	7.9	3.74	2.82	5.41	2.85	1.2	2.6e-05	Up
AT1G53040	Protein of unknown function (DUF616)	7.09	11.25	5.95	4.05	3.51	2.82	3.93	3.24	1.2	0.0033	Up
AT3G14870	Plant protein of unknown function (DUF641)	6.91	6.11	6.09	5.24	1.73	2.78	3.54	3.04	1.2	1.7e-05	Up
AT2G47860	Phototropic-responsive NPH3 family protein	6.71	7.03	4.01	4.31	2.15	3.29	3.02	1.95	1.2	0.0011	Up
AT2G40970	Homeodomain-like superfamily protein	6.49	5.36	4	3.77	1.49	2.71	2.1	2.33	1.2	0.00079	Up
AT2G16850	plasma membrane intrinsic protein 2;8	6.47	8.49	5.27	3.68	1.84	3.1	3.28	2.71	1.2	0.0023	Up
AT1G15970	DNA glycosylase superfamily protein	6.32	6.49	5.57	4.81	2.49	2.55	2.41	3	1.2	3.7e-08	Up
AT4G09500	UDP-Glycosyltransferase superfamily protein	6.16	10.5	9.82	8.61	3.4	4.19	4.17	4.45	1.2	1.3e-05	Up
AT4G26760	microtubule-associated protein 65-2	5.9	7.52	4.63	4.19	1.81	3.01	3.1	1.96	1.2	0.0003	Up
AT3G08600	Protein of unknown function (DUF1191)	5.63	7.94	6.6	4.65	1.69	3.53	3.23	2.97	1.2	0.0011	Up
AT1G65840	polyamine oxidase 4	5.62	8.82	4.27	3.52	1.98	2.97	1.95	3.05	1.2	0.0023	Up
AT2G03480	QUASIMODO2 LIKE 2	5.29	9.33	5.21	3.83	1.76	2.85	3.74	2.82	1.2	0.0052	Up
AT2G23590	methyl esterase 8	5.16	6.04	3.79	4.72	3.97	2.19	1.37	1.83	1.2	0.0051	Up
AT5G58960	Plant protein of unknown function (DUF641)	4.93	11.01	8.27	6.3	3.1	3.17	4.9	2.88	1.2	0.0014	Up
AT1G11790	arogenate dehydratase 1	4.92	6.28	4.33	3.25	2.26	2.03	2.17	2.14	1.2	2.1e-05	Up
AT4G13540		4.8	8.3	4.93	4.71	1.84	3.81	3.09	1.38	1.2	0.013	Up
AT2G42800	receptor like protein 29	4.59	9.35	7.49	4.65	1.83	2.28	4.74	3.06	1.2	0.011	Up
AT2G26330	Leucine-rich receptor-like protein kinase family protein	4.21	4.46	2.6	3.46	1.62	1.89	1.78	1.33	1.2	3.9e-06	Up
AT5G07870	HXXXD-type acyl-transferase family protein	4.2	4.92	2.17	2.46	1.92	1.26	1.48	1.72	1.2	0.0061	Up
AT4G03205	Coproporphyrinogen III oxidase	4.18	7.51	3.95	3.84	2.33	2.47	2.15	1.92	1.2	0.0006	Up
AT2G46780	RNA-binding (RRM/RBD/RNP motifs) family protein	4.16	7.61	3.47	3.47	1.73	1.62	2.42	2.85	1.2	0.006	Up
AT1G23000	Heavy metal transport/detoxification superfamily protein	3.73	2.83	3.01	2.17	2.17	0.7	2.03	0.51	1.2	0.049	Up
AT2G01760	response regulator 14	3.7	5.69	3.77	2.09	1.28	2.78	1.67	1.3	1.2	0.017	Up
AT2G32380	Transmembrane protein 97, predicted	3.62	3.69	1.64	1.8	0.51	1.24	1.72	1.34	1.2	0.042	Up
AT5G03510	C2H2-type zinc finger family protein	3.44	3.37	2.61	1.91	1.95	0.81	1.48	1.18	1.2	0.016	Up
AT5G59020	Protein of unknown function (DUF3527)	3.43	4.95	5.14	3.63	1.74	1.86	2.7	1.75	1.2	9e-05	Up
AT5G51920	Pyridoxal phosphate (PLP)-dependent transferases superfamily protein	3.42	1.46	1.66	1.25	0.71	0.92	1.36	0.59	1.2	0.037	Up
AT1G27460	no pollen germination related 1	3.36	3.67	1.34	1.21	0.93	1.34	1.34	0.9	1.2	0.031	Up
AT1G02720	galacturonosyltransferase 5	3.19	4.06	3.47	2.54	1.04	1.46	1.89	1.51	1.2	0.00017	Up
AT1G19970	ER lumen protein retaining receptor family protein	3.13	5.36	2.89	2.54	1.14	0.98	2.39	1.7	1.2	0.013	Up
AT5G62960		3.13	4.35	3.77	2.35	1.11	1.69	1.9	1.67	1.2	0.0011	Up
AT3G58350	RESTRICTED TEV MOVEMENT 3	3.11	3.78	2.45	2.86	0.6	1.94	1.26	1.53	1.2	0.005	Up
AT2G24230	Leucine-rich repeat protein kinase family protein	2.95	6.17	4.06	3.72	1.75	1.72	2.61	1.6	1.2	0.00092	Up
AT3G50240	ATP binding microtubule motor family protein	2.87	4.05	2.55	1.93	1.72	1	1.55	1.17	1.2	0.0013	Up
AT5G01370	ALC-interacting protein 1	2.86	3.9	2.55	1.73	1.25	1.18	0.98	1.63	1.2	0.0039	Up
AT2G20240	Protein of unknown function (DUF3741)	2.63	3.03	2.42	3.12	1.4	1.57	1.22	1.1	1.2	3.7e-06	Up
AT2G21770	cellulose synthase A9	2.63	2.92	2.46	2.63	0.62	1.34	1.83	1.01	1.2	0.0012	Up
ATCG01100	NADH dehydrogenase family protein	2.59	4.95	7.3	3.88	3.91	1.71	1.42	1.82	1.2	0.021	Up
AT3G08660	Phototropic-responsive NPH3 family protein	2.28	2.03	1.86	1.87	1.04	0.78	1.03	0.86	1.2	0.00015	Up
AT4G12400	stress-inducible protein, putative	2.26	2.85	3.55	1.72	1.26	0.8	1.62	1.01	1.2	0.003	Up
AT4G23420	NAD(P)-binding Rossmann-fold superfamily protein	1.87	0.91	1.24	1.01	0.6	0.57	0.86	0.34	1.2	0.017	Up
AT5G54850		1.52	1.73	1.59	1.49	0.57	0.86	1.15	0.31	1.2	0.025	Up
AT5G04310	Pectin lyase-like superfamily protein	1.48	0.76	0.7	0.64	0.27	0.47	0.34	0.51	1.2	0.014	Up
AT1G45191	Glycosyl hydrolase superfamily protein	1.46	2.58	4.93	2.25	0.61	1.35	1.53	1.45	1.2	0.02	Up
AT1G17060	cytochrome p450 72c1	1.42	0.81	0.52	0.98	0.72	0.28	0.35	0.42	1.2	0.028	Up
AT1G63230	Tetratricopeptide repeat (TPR)-like superfamily protein	1.4	1.64	0.96	1.4	0.73	0.74	0.63	0.48	1.2	0.012	Up
AT5G65820	Pentatricopeptide repeat (PPR) superfamily protein	1.24	1.08	1.43	1.28	0.32	0.77	0.42	0.67	1.2	0.0068	Up
AT5G48600	structural maintenance of chromosome 3	1.1	1.35	1.19	0.99	0.35	0.8	0.47	0.52	1.2	0.00057	Up
AT2G37300		1.05	1.97	2.13	1.36	0.64	0.87	1.18	0.33	1.2	0.042	Up
AT3G23480	Cyclopropane-fatty-acyl-phospholipid synthase	1.02	1.53	0.6	0.56	0.44	0.67	0.27	0.35	1.2	0.042	Up
AT1G63080	Pentatricopeptide repeat (PPR) superfamily protein	1	1.41	0.8	0.61	0.19	0.42	0.66	0.48	1.2	0.041	Up
AT5G11780		0.99	0.91	1	0.56	0.44	0.46	0.3	0.43	1.2	0.019	Up
AT2G22610	Di-glucose binding protein with Kinesin motor domain	0.97	1.16	0.64	0.58	0.46	0.44	0.46	0.22	1.2	0.013	Up
AT3G19300	Protein kinase superfamily protein	0.85	1.01	0.81	0.55	0.32	0.48	0.19	0.5	1.2	0.026	Up
ATCG00890	NADH-Ubiquinone/plastoquinone (complex I) protein	0.82	1.12	1.33	1.22	0.43	0.79	0.3	0.56	1.2	0.027	Up
AT1G08260	DNA polymerase epsilon catalytic subunit	0.65	0.62	0.4	0.3	0.24	0.16	0.24	0.25	1.2	0.0022	Up
AT3G19050	phragmoplast orienting kinesin 2	0.65	0.76	0.31	0.19	0.16	0.21	0.33	0.18	1.2	0.049	Up
AT5G01630	BRCA2-like B	0.34	0.59	0.17	0.31	0.13	0.16	0.16	0.17	1.2	0.036	Up
AT5G03170	FASCICLIN-like arabinogalactan-protein 11	745.56	1462.51	1584.69	1389.63	308.2	564.56	1172.18	520.6	1.1	0.025	Up
AT2G36830	gamma tonoplast intrinsic protein	542.79	738.51	378.81	327.19	242.91	228.93	261.56	219.25	1.1	0.00028	Up
AT3G47470	light-harvesting chlorophyll-protein complex I subunit A4	540.41	510.36	305.03	309.86	220.73	256.61	204.03	140.71	1.1	0.00047	Up
AT3G26520	tonoplast intrinsic protein 2	483.86	354.3	173.12	136.88	164.11	136.32	144.14	135.92	1.1	0.017	Up
AT1G11860	Glycine cleavage T-protein family	389.32	603.94	381.16	283.45	205.85	216.99	255.39	141.55	1.1	0.0008	Up
AT1G52230	photosystem I subunit H2	383.79	486.56	264.82	230.8	199.37	206.8	163.96	112.49	1.1	0.0017	Up
AT1G22410	Class-II DAHP synthetase family protein	354.84	447.1	476.7	478.13	132.59	209.62	348.62	186.31	1.1	0.0015	Up
AT3G05880	Low temperature and salt responsive protein family	322.41	620.24	333.25	239.01	147.71	217.16	215.04	168.34	1.1	0.0028	Up
AT5G15970	stress-responsive protein (KIN2) / stress-induced protein (KIN2) / cold-responsive protein (COR6.6) / cold-regulated protein (COR6.6)	233.01	564.05	432.2	264.39	126.17	255.91	207.97	146.31	1.1	0.007	Up
AT3G29360	UDP-glucose 6-dehydrogenase family protein	219.47	323.68	239.77	160.62	98.38	109.01	127.15	138.23	1.1	0.00016	Up
AT1G19300	Nucleotide-diphospho-sugar transferases superfamily protein	203.91	262.33	277.7	246.59	79.51	97.85	204.5	109.29	1.1	0.002	Up
AT5G65660	hydroxyproline-rich glycoprotein family protein	154.47	91.75	47.71	66.78	28.28	48.56	61.74	40.11	1.1	0.017	Up
AT5G57800	Fatty acid hydroxylase superfamily	130.58	155.66	133.17	117.01	52.86	62.15	84.05	67.41	1.1	6.5e-07	Up
AT5G13630	magnesium-chelatase subunit chlH, chloroplast, putative / Mg-protoporphyrin IX chelatase, putative (CHLH)	127.75	164.51	91.25	84.96	52.93	56.87	70.67	43.36	1.1	0.00021	Up
AT1G32100	pinoresinol reductase 1	126.71	162.16	169.84	162	53.79	70.71	125.08	62.67	1.1	0.0011	Up
AT2G43100	isopropylmalate isomerase 2	121.94	89.31	173.68	115.03	56.35	73.48	22.24	97.58	1.1	0.023	Up
AT3G27960	Tetratricopeptide repeat (TPR)-like superfamily protein	87.4	91.52	81.05	77.45	27.92	36.87	59.42	42.84	1.1	8.5e-05	Up
AT3G25920	ribosomal protein L15	83.96	128.25	61.68	49.69	38.3	47.61	40.51	32.65	1.1	0.0022	Up
AT5G43060	Granulin repeat cysteine protease family protein	76.38	90.38	79.91	85.8	32.13	41.79	55.25	35.44	1.1	1.4e-06	Up
AT1G63120	RHOMBOID-like 2	75.09	90.94	77.35	81.42	26.96	39.98	57.1	36.44	1.1	7.1e-05	Up
AT2G31390	pfkB-like carbohydrate kinase family protein	67.17	98.59	82.51	64.63	32.41	34.38	45.54	40.75	1.1	3.2e-06	Up
ATCG00080	photosystem II reaction center protein I	66.49	88.73	104.85	34.86	47.12	40.17	37.17	20.79	1.1	0.024	Up
AT4G26580	RING/U-box superfamily protein	65.53	78.86	71.7	70.96	22.96	31.82	65.23	23.03	1.1	0.0081	Up
AT1G48850	chorismate synthase, putative / 5-enolpyruvylshikimate-3-phosphate phospholyase, putative	65.4	76.27	69.9	65.93	25.13	33.42	45.4	34.29	1.1	2.6e-06	Up
AT5G06700	Plant protein of unknown function (DUF828)	65.25	80.62	55.6	43.53	26.32	27.92	41.46	26.78	1.1	0.00029	Up
AT2G45300	RNA 3'-terminal phosphate cyclase/enolpyruvate transferase, alpha/beta	59.9	65.68	65.57	65.36	21.78	29.7	46.68	29.99	1.1	7.4e-05	Up
AT2G29550	tubulin beta-7 chain	47.79	74.99	39.94	31.68	20.11	23.63	30.49	24.64	1.1	0.0025	Up
AT3G18080	B-S glucosidase 44	47.69	34.8	25.57	20.6	15.04	16.11	15.44	18.18	1.1	0.0006	Up
AT2G30550	alpha/beta-Hydrolases superfamily protein	46.93	41.41	45.04	42.18	18.76	19.06	28.49	16.51	1.1	1.4e-07	Up
AT3G61580	Fatty acid/sphingolipid desaturase	46.59	52.62	28.66	27.56	17.76	16.27	20.49	21.85	1.1	0.00035	Up
AT1G70890	MLP-like protein 43	44.94	44.34	15.93	16.63	15	17.3	15.08	12.49	1.1	0.018	Up
AT3G11700	FASCICLIN-like arabinogalactan protein 18 precursor	41.88	60.21	41.18	33.3	14.02	19.09	29.11	24.22	1.1	0.00095	Up
AT3G20570	early nodulin-like protein 9	41.85	56.38	44.88	43.92	19.11	24.99	28.94	19.01	1.1	4.2e-06	Up
AT1G01300	Eukaryotic aspartyl protease family protein	40.34	58.68	32.47	22.97	10.77	15.91	20.78	26.8	1.1	0.0089	Up
AT1G21830		39.97	51.41	38.97	47.28	15.52	18.57	35.52	19.88	1.1	0.0013	Up
AT5G62580	ARM repeat superfamily protein	38.28	57.44	55.8	46.63	13.74	21.21	44.4	16.66	1.1	0.011	Up
AT2G17300		36.52	65.39	58.22	48.29	18.27	22.43	40.66	20.05	1.1	0.0031	Up
AT4G00360	cytochrome P450, family 86, subfamily A, polypeptide 2	34.74	46.76	24.82	24.39	13.96	16.72	19.05	15.1	1.1	0.00032	Up
AT2G26800	Aldolase superfamily protein	34.35	33.19	31.79	27.23	13.09	14.5	20.76	13.78	1.1	7.2e-07	Up
AT4G23710	vacuolar ATP synthase subunit G2	32.21	51.58	28.82	22	13.29	16.92	18.16	16.68	1.1	0.00079	Up
AT3G01680		31.54	39.01	30.62	26.62	11.59	18.67	19.22	14.37	1.1	2.6e-05	Up
AT5G11950	Putative lysine decarboxylase family protein	31.44	59.67	47.24	40.64	17.85	19.6	29.6	18.85	1.1	0.00021	Up
AT2G28870		29.67	40.55	33.53	25.9	18.14	14.05	21.27	10.49	1.1	0.00061	Up
AT3G54690	Sugar isomerase (SIS) family protein	28.67	36.31	26.8	21.66	9.29	14.1	14.03	16.94	1.1	9.3e-05	Up
AT1G70670	Caleosin-related family protein	28.09	25.19	22.87	15.76	12.64	11.28	9.17	12.32	1.1	1.9e-05	Up
AT1G35290	Thioesterase superfamily protein	27.54	42.06	34.51	27.28	11.78	17.49	19.78	14.36	1.1	6.2e-05	Up
AT1G79620	Leucine-rich repeat protein kinase family protein	26.67	49.33	42.84	41.9	9.35	18.94	35.9	15.26	1.1	0.02	Up
AT2G22795		25.82	40.89	26.67	17.26	9.29	12.2	17.72	14.74	1.1	0.0027	Up
AT1G24170	Nucleotide-diphospho-sugar transferases superfamily protein	25.16	36.06	14.5	11.05	8.52	9.18	10.7	15.13	1.1	0.023	Up
AT1G26920		25.1	31.38	17.99	14.83	12.93	11.64	12.7	8.42	1.1	0.0026	Up
AT1G79420	Protein of unknown function (DUF620)	23.9	27.37	27.67	29.09	8.66	13.04	20.73	9.24	1.1	0.00067	Up
AT2G28740	histone H4	23.66	54.37	19.79	18.41	16.44	12.94	19.27	10.88	1.1	0.035	Up
AT1G02950	glutathione S-transferase F4	23.16	26.39	23.58	18.89	10.9	11.82	14.34	9.1	1.1	6.2e-06	Up
AT4G36250	aldehyde dehydrogenase 3F1	21.34	38.55	21.18	16.75	10.28	12.9	11.11	13.65	1.1	0.00094	Up
AT1G05170	Galactosyltransferase family protein	20.1	33.11	34.28	27.95	10.55	13.54	20.66	10.99	1.1	0.00052	Up
AT1G29160	Dof-type zinc finger DNA-binding family protein	20.1	24.87	15.53	16.49	6.48	10.33	14.34	6.33	1.1	0.0065	Up
AT5G42710		19.89	24.53	24.81	21.87	6.49	10.23	18.76	8.43	1.1	0.0029	Up
AT2G28510	Dof-type zinc finger DNA-binding family protein	19.49	13.56	14.27	11.83	5.91	8.16	8.16	7.14	1.1	1.3e-05	Up
AT5G67160	HXXXD-type acyl-transferase family protein	17.76	16.43	14.99	14.22	8.52	6.69	7.54	7.44	1.1	8.8e-11	Up
AT4G18550	alpha/beta-Hydrolases superfamily protein	17.18	16.43	16.48	15.61	6.42	7.92	10.27	6.57	1.1	1.3e-07	Up
AT2G01070	Lung seven transmembrane receptor family protein	15.83	27.35	19.13	14.38	8.4	8.33	11.58	8.98	1.1	0.00022	Up
AT1G27210	ARM repeat superfamily protein	15.39	23.49	20.43	21.61	6.73	11.1	15.4	7.49	1.1	0.0021	Up
AT4G28640	indole-3-acetic acid inducible 11	15.38	16.99	13.46	16.19	4.87	7.84	10.68	6.4	1.1	0.00015	Up
AT2G35620	Leucine-rich repeat protein kinase family protein	15.26	23.96	19.09	15.27	6.6	8.69	13.37	7.35	1.1	0.00071	Up
AT1G56010	NAC domain containing protein 1	15.21	7.61	8.81	8.45	3.49	4.54	7.09	4.91	1.1	0.003	Up
AT3G58620	tetratricopetide-repeat thioredoxin-like 4	14.22	4.52	3.98	3.44	2.94	2.69	3.05	4.04	1.1	0.047	Up
AT4G30020	PA-domain containing subtilase family protein	14.13	14.15	7.4	6.97	3.44	5.81	5.93	5.95	1.1	0.0043	Up
AT1G19840	SAUR-like auxin-responsive protein family	14	15.6	8.4	9.63	6.53	8.64	4.8	3.29	1.1	0.016	Up
AT1G47410		13.72	13.31	10.74	9.4	3.03	7.15	8.47	4.81	1.1	0.0063	Up
AT2G34300	S-adenosyl-L-methionine-dependent methyltransferases superfamily protein	13.72	18.29	8.59	8.29	4.14	5.66	7.08	7.1	1.1	0.0038	Up
AT3G03773	HSP20-like chaperones superfamily protein	13.7	12.84	12.83	11.28	6.18	6.52	6.59	5.43	1.1	9.2e-12	Up
AT3G27060	Ferritin/ribonucleotide reductase-like family protein	13.18	18.42	8.45	5.73	5.63	6.61	5.51	5.44	1.1	0.016	Up
AT5G24570		12.96	17.37	7.22	9.99	6.68	4.93	7.77	4.7	1.1	0.017	Up
AT3G14220	GDSL-like Lipase/Acylhydrolase superfamily protein	12.04	11.56	7.6	6.46	4.92	4.2	4.34	5.23	1.1	0.00047	Up
AT1G53300	tetratricopetide-repeat thioredoxin-like 1	11.63	14.42	8.98	7.84	5.18	5.01	5.19	5.86	1.1	7e-05	Up
AT3G27050		11.36	12.23	10.05	9.04	4.39	6.73	5.06	4.43	1.1	7e-06	Up
AT1G35780		11.18	14.2	12.42	10.65	3.6	6.03	8.45	5.19	1.1	0.00039	Up
AT5G65810		10.72	17.21	9.91	8.74	4.3	5.41	7.36	5.45	1.1	0.0011	Up
AT3G03220	expansin A13	9.9	10.28	8.48	6.24	3.8	4.54	4.91	3.8	1.1	5.8e-05	Up
AT2G37280	pleiotropic drug resistance 5	9.76	9.97	6.49	6.46	2.71	3.62	4.86	4.3	1.1	0.00014	Up
AT5G58300	Leucine-rich repeat protein kinase family protein	9.61	15.94	9.38	7.79	4.55	4.69	7.18	4.53	1.1	0.0015	Up
AT1G34040	Pyridoxal phosphate (PLP)-dependent transferases superfamily protein	9.32	17.73	13.12	11.89	5.3	4.74	11.07	5.04	1.1	0.011	Up
AT1G67190	F-box/RNI-like superfamily protein	9.24	8.64	7.8	5.5	3.12	3.94	4.27	3.86	1.1	5.2e-05	Up
ATCG00540	photosynthetic electron transfer A	9.18	12.01	14.37	8.77	7.73	5	4.92	4.16	1.1	0.00063	Up
AT1G77700	Pathogenesis-related thaumatin superfamily protein	9.08	13.63	7.43	6.71	2.39	5.7	5.9	3.88	1.1	0.011	Up
ATCG00430	photosystem II reaction center protein G	8.82	10.95	8.71	7.13	7.12	3.46	3.45	4.03	1.1	0.0042	Up
AT3G45850	P-loop containing nucleoside triphosphate hydrolases superfamily protein	8.55	10.25	6.81	6.9	3.06	4.55	4.89	3.23	1.1	5.3e-05	Up
AT1G67830	alpha-fucosidase 1	8.34	13.56	6.65	6.47	5.37	3.47	5.3	3.11	1.1	0.0065	Up
AT5G55480	SHV3-like 1	8	10.24	6.23	5.9	2.11	3.65	4.53	4.14	1.1	0.0011	Up
AT1G28110	serine carboxypeptidase-like 45	7.57	9.16	2.71	3.25	2.84	3.08	2.59	2.91	1.1	0.028	Up
AT3G16330		7.38	4.93	8.23	4.09	3.13	3.11	2.48	3.57	1.1	0.0048	Up
AT2G06925	Phospholipase A2 family protein	6.94	17.97	10.68	7.27	4.35	5.44	6.88	5.12	1.1	0.021	Up
AT1G76250		6.79	8.58	7.73	9.1	2.89	3.24	6.85	3.2	1.1	0.0043	Up
AT2G01420	Auxin efflux carrier family protein	6.53	14.39	8.67	8.92	3.78	4.91	6.93	3.35	1.1	0.0052	Up
AT5G58360	ovate family protein 3	6.09	5.05	4.75	4.78	2.15	1.98	3.66	2.25	1.1	0.0023	Up
AT1G47900	Plant protein of unknown function (DUF869)	5.85	10.72	6.32	5.98	2.96	3.6	4.8	2.98	1.1	0.0014	Up
AT3G55110	ABC-2 type transporter family protein	5.74	8.03	7.3	5.75	1.92	2.68	2.33	5.95	1.1	0.011	Up
AT4G30850	heptahelical transmembrane protein2	5.74	4.76	3.39	2.88	2.18	2.15	1.99	2.12	1.1	0.0012	Up
AT5G18930	Adenosylmethionine decarboxylase family protein	5.38	8.7	8.49	12.75	4.15	3.63	6.55	2.54	1.1	0.0084	Up
AT3G47220	phosphatidylinositol-speciwc phospholipase C9	5.36	4.61	2.56	3.22	2.92	1.75	1.66	1.76	1.1	0.0055	Up
AT5G53200	Homeodomain-like superfamily protein	5.29	7.49	4.5	6.44	5.06	2.35	2.74	1.95	1.1	0.0097	Up
AT1G58160	Mannose-binding lectin superfamily protein	5.22	7.37	4.92	2.99	1.67	3.28	3	1.95	1.1	0.023	Up
AT4G28320	Glycosyl hydrolase superfamily protein	5.16	9.14	6.78	4.93	2.72	3.66	3.51	3.05	1.1	0.00086	Up
AT5G46530	AWPM-19-like family protein	5.02	9.14	6.61	5.21	2.56	3.54	3.59	3.23	1.1	0.0017	Up
AT1G73020		5.01	4.53	3.86	3.21	1.65	1.94	2.37	1.95	1.1	1e-05	Up
AT5G11990	proline-rich family protein	4.92	6.67	5.33	4.49	3.32	2.58	3.61	1.45	1.1	0.026	Up
AT5G52990	SNARE-like superfamily protein	4.71	5.35	4.41	3.56	1.04	3.88	1.81	2.05	1.1	0.024	Up
AT4G09510	cytosolic invertase 2	4.7	3.84	3.94	2.67	1.86	1.93	1.64	2.04	1.1	9.4e-05	Up
AT4G20040	Pectin lyase-like superfamily protein	4.67	8.13	7.13	7.92	2.99	2.84	4.34	3.81	1.1	0.00063	Up
AT3G51030	thioredoxin H-type 1	4.34	6.43	5.43	3.18	3.34	2.34	2.51	1.38	1.1	0.013	Up
AT5G35520	minichromosome instability 12 (mis12)-like	4.27	5.86	4.18	3.91	1.98	3.46	1.67	2.04	1.1	0.0035	Up
AT2G36470	Plant protein of unknown function (DUF868)	4.16	1.97	2.38	1.74	2.04	0.94	0.64	1.34	1.1	0.038	Up
AT1G26100	Cytochrome b561/ferric reductase transmembrane protein family	3.92	6.4	6.18	5.78	2.61	2.06	3.8	2.33	1.1	0.0013	Up
AT1G53180		3.61	5.74	1.94	2.26	2.49	1.41	1.65	1.17	1.1	0.043	Up
AT2G30990	Protein of unknown function (DUF688)	3.61	2.74	2.05	1.64	0.92	1.08	1.17	1.8	1.1	0.011	Up
AT4G32840	phosphofructokinase 6	3.61	2.59	2.05	1.74	0.66	1.41	1.82	1.01	1.1	0.017	Up
AT3G23760		3.58	5.97	2.73	3.29	1.91	2.36	2.41	1.22	1.1	0.016	Up
AT3G16070		3.5	6.62	5.64	3.84	2.66	2.2	2.99	2.01	1.1	0.035	Up
AT1G64625	Serine/threonine-protein kinase WNK (With No Lysine)-related	2.99	3.61	2.18	2.09	0.88	1.52	2.11	0.74	1.1	0.022	Up
AT2G17370	3-hydroxy-3-methylglutaryl-CoA reductase 2	2.94	4	2.58	1.97	1.16	1.6	1.8	1.18	1.1	0.0056	Up
AT3G02110	serine carboxypeptidase-like 25	2.76	6.17	2.08	2.07	1.94	1.86	1.73	1.23	1.1	0.041	Up
AT4G19050	NB-ARC domain-containing disease resistance protein	2.73	4.07	3.15	2.46	1.36	1.77	1.82	1.13	1.1	0.00046	Up
AT4G16400		2.72	3.39	3.6	4.32	1.05	1.95	2.43	1.33	1.1	0.0031	Up
AT1G75260	oxidoreductases, acting on NADH or NADPH	2.58	3.06	1.67	2.29	0.99	1.58	1.28	0.86	1.1	0.0084	Up
AT5G45530	Protein of unknown function (DUF594)	2.45	3.35	2.47	1.72	1.73	0.97	0.89	1.29	1.1	0.0036	Up
AT5G16340	AMP-dependent synthetase and ligase family protein	2.35	9.72	5.4	4.59	2.05	3.69	2.65	2.18	1.1	0.033	Up
AT1G71830	somatic embryogenesis receptor-like kinase 1	2.25	4.13	2.12	1.87	1.24	1.45	1.38	1.18	1.1	0.0054	Up
AT5G20870	O-Glycosyl hydrolases family 17 protein	2.21	3.5	2.01	2.05	1.06	1.21	1.34	1.25	1.1	0.005	Up
AT5G55400	Actin binding Calponin homology (CH) domain-containing protein	2.18	2.67	1.6	1.34	1	0.93	1.1	0.71	1.1	0.0028	Up
AT5G27550	P-loop containing nucleoside triphosphate hydrolases superfamily protein	2.15	2.7	1.59	1.14	1.29	1.04	0.73	0.7	1.1	0.011	Up
AT2G19090	Protein of unknown function (DUF630 and DUF632)	2.12	1.93	2.22	1.79	0.86	1.41	0.93	0.79	1.1	0.00087	Up
AT4G33130		2.01	4.53	2.75	3.73	1.25	1.73	1.54	1.65	1.1	0.0042	Up
AT3G23840	HXXXD-type acyl-transferase family protein	1.91	4.15	4.39	4	2.31	1.69	2.2	0.97	1.1	0.022	Up
AT1G60630	Leucine-rich repeat protein kinase family protein	1.79	2.32	1.69	1.66	1.25	0.84	1.15	0.49	1.1	0.011	Up
AT2G21880	RAB GTPase homolog 7A	1.7	2.75	0.84	1.79	1.07	0.8	0.8	0.83	1.1	0.035	Up
AT4G24790	AAA-type ATPase family protein	1.7	2.12	0.96	1.23	0.8	0.62	0.8	0.74	1.1	0.0047	Up
AT1G23880	NHL domain-containing protein	1.68	2.43	1.46	1.32	1.11	0.53	0.9	0.9	1.1	0.0091	Up
AT2G22830	squalene epoxidase 2	1.65	2.23	1.36	0.9	0.93	0.91	0.71	0.52	1.1	0.023	Up
AT1G14180	RING/U-box superfamily protein	1.64	2.34	2.11	1.54	0.93	0.77	1.29	0.83	1.1	0.007	Up
AT1G72530	plastid developmental protein DAG, putative	1.56	3.95	3	3.23	1.29	1.19	1.77	1.42	1.1	0.027	Up
AT3G51150	ATP binding microtubule motor family protein	1.53	3.05	1.39	0.99	0.83	0.79	1.06	0.68	1.1	0.017	Up
AT3G42660	transducin family protein / WD-40 repeat family protein	1.23	1.57	0.96	0.88	0.91	0.64	0.32	0.41	1.1	0.018	Up
AT5G61290	Flavin-binding monooxygenase family protein	1.22	1.9	1.44	1.2	1.2	0.55	0.79	0.46	1.1	0.032	Up
AT5G10580	Protein of unknown function, DUF599	0.94	1.67	1.76	2.6	1.25	0.44	0.86	0.8	1.1	0.026	Up
AT1G73860	P-loop containing nucleoside triphosphate hydrolases superfamily protein	0.6	0.51	0.45	0.57	0.34	0.13	0.34	0.25	1.1	0.014	Up
AT3G21210	zinc ion binding	0.58	0.6	0.55	0.88	0.32	0.39	0.28	0.32	1.1	0.025	Up
AT5G07810	SNF2 domain-containing protein / helicase domain-containing protein / HNH endonuclease domain-containing protein	0.36	0.37	0.22	0.3	0.1	0.16	0.15	0.19	1.1	0.019	Up
AT5G48930	hydroxycinnamoyl-CoA shikimate/quinate hydroxycinnamoyl transferase	586.47	714.84	747.2	742.39	235.02	345.87	552.07	289.04	1	0.00082	Up
AT5G49720	glycosyl hydrolase 9A1	419.86	503.55	448.75	437.38	170.53	219.69	359.94	196.6	1	0.0005	Up
AT5G66040	sulfurtransferase protein 16	299.96	173.9	127.51	131.84	98.19	98.33	95.53	84.92	1	0.0015	Up
AT5G53370	pectin methylesterase PCR fragment F	278.2	311.64	233.72	236.77	119.08	123.46	183.8	125.58	1	1.3e-05	Up
AT4G27440	protochlorophyllide oxidoreductase B	101.15	91.9	40.52	39.35	35.22	40.76	33.58	32.82	1	0.011	Up
AT1G80120	Protein of unknown function (DUF567)	77.91	70.79	67.4	64.9	28.79	30.24	47.24	37.73	1	4.4e-06	Up
AT1G33800	Protein of unknown function (DUF579)	71.05	138.78	116.61	109.33	27.18	49.82	91.16	52.41	1	0.016	Up
AT1G23190	Phosphoglucomutase/phosphomannomutase family protein	60.46	80.6	74.16	60.16	29.56	31.78	48.33	35.06	1	4.2e-05	Up
AT3G01670		50.64	63.87	46.93	44.51	20.01	31.68	33.12	21.12	1	0.00013	Up
AT5G06530	ABC-2 type transporter family protein	48.34	25.75	24.7	28.69	18.65	14.74	16.89	14.75	1	0.00011	Up
AT3G42950	Pectin lyase-like superfamily protein	36.47	54.62	51.36	44.65	16.12	22.89	37.61	21.17	1	0.0024	Up
AT2G36895		36.46	41.42	31.66	31.03	16.23	17.78	22.95	16.65	1	4.8e-06	Up
AT2G39890	proline transporter 1	35.76	44.26	39.49	31.56	17.19	22.02	23.32	15.14	1	8.2e-06	Up
AT3G14720	MAP kinase 19	29.79	45.26	48.87	43.81	18.85	20.92	27.46	20.68	1	2.4e-05	Up
AT5G22490	O-acyltransferase (WSD1-like) family protein	28.86	90	62.77	74.63	20.53	53.33	31.8	28.07	1	0.029	Up
AT3G01810		26.55	32.2	30.33	30.69	11.45	15.27	22.12	12.45	1	9.9e-05	Up
AT3G17420	glyoxysomal protein kinase 1	26.04	34	32.56	30.64	12.4	14.39	18.69	18.27	1	2.2e-06	Up
AT1G72220	RING/U-box superfamily protein	24.64	34.07	30.15	27.84	11.62	13.78	20.5	13.36	1	6.7e-05	Up
AT1G80870	Protein kinase superfamily protein	22.9	23.02	20.05	20.08	10.1	11.7	13.49	9.69	1	5.2e-08	Up
AT5G45290	RING/U-box superfamily protein	21.96	29.89	26.45	24.26	7.92	13.24	21.05	11.26	1	0.0042	Up
AT1G76550	Phosphofructokinase family protein	20.77	26.18	20.34	18.55	8.95	10.7	14.37	10.79	1	2.3e-05	Up
AT5G13710	sterol methyltransferase 1	20.2	29.91	16.28	13.8	9.45	10.88	12.12	9.51	1	0.0015	Up
AT5G47770	farnesyl diphosphate synthase 1	19.24	33.4	17.69	13.96	8.02	11.41	12.91	11.42	1	0.0054	Up
AT1G24120	ARG1-like 1	18.9	21.88	20.05	19.68	8.13	11.24	12.96	9.87	1	8.6e-07	Up
AT4G29700	Alkaline-phosphatase-like family protein	17.84	8.27	13.79	7.02	7.6	5.58	4.65	6.5	1	0.0086	Up
AT3G01950	Protein of unknown function (DUF 3339)	17.72	23.12	17.68	16.75	12.41	10.71	9.97	6.4	1	0.0016	Up
AT2G34560	P-loop containing nucleoside triphosphate hydrolases superfamily protein	17.5	26.32	16.95	15.29	9.67	9.85	10.65	9.28	1	4.7e-05	Up
AT2G22980	serine carboxypeptidase-like 13	16.47	17.57	14.15	11.07	8.19	7.76	9.73	4.87	1	0.00052	Up
AT1G16520		15.76	18.55	12.34	11.81	7.6	6.77	9.1	7.29	1	7e-05	Up
AT3G11490	rac GTPase activating protein	15.42	17.8	13.97	11.95	6.49	7.06	10.63	6.3	1	0.00029	Up
AT1G53035		15.39	20.94	15.21	11.66	6.14	12.05	7.66	6.99	1	0.0043	Up
AT3G48720	HXXXD-type acyl-transferase family protein	15.01	21.47	15.19	11.95	8.45	7.64	8.92	7.93	1	4.8e-05	Up
AT5G18970	AWPM-19-like family protein	14.7	21.63	15.76	14.05	5.55	10.94	10.49	7.08	1	0.002	Up
AT3G63280	NIMA-related kinase 4	13.56	22.8	20.93	20.79	6.85	8.5	16.67	7.83	1	0.0062	Up
AT1G23080	Auxin efflux carrier family protein	13.2	20.69	11.1	11.4	3.59	7.43	10.22	7.83	1	0.015	Up
AT1G05760	Mannose-binding lectin superfamily protein	12.72	14.22	14.28	12.08	4.54	7.4	9.49	5.97	1	0.001	Up
AT3G57800	basic helix-loop-helix (bHLH) DNA-binding superfamily protein	12.18	18.35	10.67	8.79	5.29	7.32	7.37	6.44	1	0.0017	Up
AT2G22930	UDP-Glycosyltransferase superfamily protein	11.74	4.26	10.23	6.45	3.85	3.19	3.43	6.56	1	0.029	Up
AT1G77060	Phosphoenolpyruvate carboxylase family protein	11.1	6.22	3.77	4.35	3.8	2.8	2.26	4.53	1	0.039	Up
AT1G10120	basic helix-loop-helix (bHLH) DNA-binding superfamily protein	10.71	10.02	8.67	8.66	3.36	6.09	5.81	4.19	1	0.0001	Up
AT1G24030	Protein kinase superfamily protein	10.46	15.35	13.82	13.96	3.52	7.22	11.64	5.48	1	0.017	Up
AT3G07420	asparaginyl-tRNA synthetase 2	10.27	10.52	9.43	8.71	3.09	5.68	6.27	4.63	1	0.00016	Up
AT4G39050	Kinesin motor family protein	9.86	10	6.8	6.51	3.39	4.03	5.5	4.52	1	0.00034	Up
AT1G26570	UDP-glucose dehydrogenase 1	9.83	10.98	10.31	6.6	3.17	5.92	5.2	5.21	1	0.0011	Up
AT5G01170	Protein of unknown function (DUF740)	9.17	15.61	13.48	13.23	5.96	6.51	9.14	4.95	1	0.0008	Up
AT3G09920	phosphatidyl inositol monophosphate 5 kinase	9.11	8.06	7.85	7.21	4.14	3.72	4.77	4	1	6.8e-10	Up
AT1G22220	F-box family protein	8.43	10.82	9.62	12.14	6.28	4.35	6.26	4.25	1	8.5e-05	Up
AT5G66460	Glycosyl hydrolase superfamily protein	6.58	12.62	6.41	5.54	4	4	4.59	3.47	1	0.0047	Up
AT3G29575	ABI five binding protein 3	6.44	4.9	5.76	5.08	3.71	3.37	1.75	2.88	1	0.00084	Up
AT2G40640	RING/U-box superfamily protein	6.23	7.57	4.82	4.09	2.97	3.18	3.22	2.26	1	0.0012	Up
AT3G28840	Protein of unknown function (DUF1216)	5.71	11.14	7.34	5.83	4.25	3.97	4.2	2.96	1	0.0032	Up
AT3G12150		5.33	3.86	2.47	3.47	2.18	2.12	2.17	1.36	1	0.0039	Up
AT1G18440	Peptidyl-tRNA hydrolase family protein	5.26	6.96	5.1	3.73	3.64	2.27	2.7	2.35	1	0.002	Up
AT3G22410	Sec14p-like phosphatidylinositol transfer family protein	5.08	5.97	7.24	4.96	1.94	2.69	4.03	3.1	1	0.00097	Up
AT5G41620		4.21	3.22	3.47	2.71	1.68	1.62	2.01	1.7	1	9.3e-05	Up
AT1G32540	lsd one like 1	3.77	4.41	3.83	1.45	1.93	1.84	1.93	1.22	1	0.025	Up
AT3G07130	purple acid phosphatase 15	3.69	6.87	3.99	2.3	3.02	1.69	2.63	1.69	1	0.04	Up
AT2G05210	Nucleic acid-binding, OB-fold-like protein	3.48	4.22	3.08	1.99	1.49	1.97	1.65	1.42	1	0.0024	Up
AT3G53760	GAMMA-TUBULIN COMPLEX PROTEIN 4	3.33	4.08	2.48	2.92	1.2	1.99	1.83	1.6	1	0.00057	Up
AT5G04680	Ankyrin repeat family protein	3.12	4.55	3.3	2.95	1.73	1.79	2.4	1.23	1	0.0025	Up
AT2G34530		3.09	4	2.61	2.06	1.96	1.69	1.25	1.37	1	0.016	Up
AT5G24318	O-Glycosyl hydrolases family 17 protein	2.89	4.93	5.05	3.98	1.79	2.46	2.74	1.77	1	0.0031	Up
AT1G67070	Mannose-6-phosphate isomerase, type I	2.79	4.57	4.32	4.11	2.2	1.59	2.92	1.5	1	0.0045	Up
AT3G17070	Peroxidase family protein	2.1	2.3	2.44	3.43	1.57	1.02	1.57	1.25	1	0.0021	Up
AT1G08300	no vein-like	1.96	1.16	1.59	1.94	0.94	0.91	0.68	0.88	1	0.00036	Up
AT1G67320	DNA primase, large subunit family	1.9	1.46	0.89	0.93	0.54	0.56	0.93	0.68	1	0.029	Up
AT2G41540	6-phosphogluconate dehydrogenase family protein	1.65	3.68	1.73	1.97	0.97	1.32	1.47	0.95	1	0.024	Up
AT1G71990	fucosyltransferase 13	1.51	1.41	0.76	1.27	0.51	0.56	0.59	0.92	1	0.041	Up
AT2G21850	Cysteine/Histidine-rich C1 domain family protein	1.43	1.3	0.88	0.68	0.6	0.68	0.41	0.54	1	0.027	Up
AT2G31650	homologue of trithorax	1.01	1.07	1.3	0.82	0.47	0.7	0.52	0.47	1	0.00085	Up
AT3G20150	Kinesin motor family protein	1	1.66	1.01	0.78	0.39	0.77	0.56	0.56	1	0.016	Up
AT5G23660	homolog of Medicago truncatula MTN3	89.53	14.81	54.61	61.6	146.05	103.96	89.83	123.59	-1	0.046	Down
AT3G11410	protein phosphatase 2CA	85.49	88.35	174.26	168.54	313.06	298.93	232.88	238.87	-1	0.00076	Down
AT5G12860	dicarboxylate transporter 1	79.64	126.79	132.12	98.86	208.82	259.53	221.86	230.74	-1	7.1e-06	Down
AT1G31130		77.4	48.26	78.14	75.63	151.12	124.13	135.8	177.8	-1	1.1e-06	Down
AT2G31880	Leucine-rich repeat protein kinase family protein	74.02	29.28	37.1	29.62	107.01	57.04	65.65	138.97	-1	0.02	Down
AT3G15210	ethylene responsive element binding factor 4	51.06	29.02	48.84	42.17	105.97	75.59	54.51	132.53	-1	0.0021	Down
AT3G61640	arabinogalactan protein 20	35.81	21.6	23.82	21.89	59.62	43.82	32.92	83.58	-1	0.0058	Down
AT1G56600	galactinol synthase 2	33.43	44.41	96.6	137.29	157.53	154.43	145.9	190.44	-1	0.03	Down
AT4G26970	aconitase 2	28.33	22.58	30.24	32.72	55.35	58.73	53.11	73.48	-1	1.9e-09	Down
AT2G28720	Histone superfamily protein	28.28	41.33	68.8	81.06	146.94	128.81	96.36	93.3	-1	0.0064	Down
AT1G27200	Domain of unknown function (DUF23)	23.96	16.46	27.43	27.68	59.3	45.56	45.75	54.27	-1	1.9e-07	Down
AT5G48480	Lactoylglutathione lyase / glyoxalase I family protein	21.59	31.19	38.02	37	80.89	68.52	64.16	59.68	-1	6.3e-06	Down
AT2G30970	aspartate aminotransferase 1	19.61	23.29	29.54	23.49	50	58.26	43.08	54.25	-1	2.1e-08	Down
AT1G62422		18.4	21.93	36.25	38.62	68.78	56.05	59.79	57.88	-1	0.00032	Down
AT4G25900	Galactose mutarotase-like superfamily protein	18	10.28	15.43	18.52	34.25	34.16	23.41	38.67	-1	6.1e-05	Down
AT5G12470	Protein of unknown function (DUF3411)	17.42	39.25	44.69	38.28	76.22	83.73	66.72	69.98	-1	0.0015	Down
AT3G55610	delta 1-pyrroline-5-carboxylate synthase 2	16.71	7.89	12.49	14.54	25.91	34.18	23.94	25.07	-1	9e-05	Down
AT1G70090	glucosyl transferase family 8	15.67	18.12	14.19	11.85	28.24	24.31	25.99	48.54	-1	0.0015	Down
AT2G36970	UDP-Glycosyltransferase superfamily protein	15.11	14	38.78	53.96	72.27	59.45	61.79	64.59	-1	0.028	Down
AT5G13550	sulfate transporter 4.1	12.22	10.13	19.01	13.51	28.08	31.11	20.3	38.12	-1	0.00024	Down
AT2G44080	ARGOS-like	12.06	4.89	6.56	6.75	14.37	13.55	13.32	22.16	-1	0.0083	Down
AT1G18150	Protein kinase superfamily protein	11.92	15.78	23.98	22.29	35.2	43.37	40.54	39.1	-1	4.8e-05	Down
AT5G58120	Disease resistance protein (TIR-NBS-LRR class) family	11.87	6.59	8.51	8.71	15.95	15.05	14.89	28.53	-1	0.0017	Down
AT4G20780	calmodulin like 42	11.81	13.55	17.52	19.64	34.6	33.41	25.65	40.07	-1	2.6e-05	Down
AT3G61630	cytokinin response factor 6	11.31	8.47	13.28	17.61	27.76	30.9	21.15	27.3	-1	7.4e-05	Down
AT5G53470	acyl-CoA binding protein 1	10.58	12.06	14.12	12.49	25.45	30.02	25.3	23.74	-1	4.2e-11	Down
AT5G05410	DRE-binding protein 2A	10.24	6.05	9.63	8.35	23.54	21.36	11.59	15.83	-1	0.00083	Down
AT4G17030	expansin-like B1	8.55	19.46	18.77	18.84	33.27	36.92	24.63	43.56	-1	0.0039	Down
AT5G07890	myosin heavy chain-related	7.87	8.86	14.33	9.58	23.46	25.94	17.1	21.38	-1	3.9e-05	Down
AT3G25610	ATPase E1-E2 type family protein / haloacid dehalogenase-like hydrolase family protein	7.73	6.1	7.57	8.29	16.58	12.45	13.62	20.88	-1	2.2e-06	Down
AT1G15060	Uncharacterised conserved protein UCP031088, alpha/beta hydrolase	7.34	9.03	10.05	9.56	16.99	21.41	19.38	17.78	-1	1.6e-09	Down
AT4G36550	ARM repeat superfamily protein	6.06	5.55	8.21	8.78	15.34	15.04	13.71	16.4	-1	5e-08	Down
AT5G08010		6.05	5.63	8.28	6.69	16.02	18.19	9.89	12.66	-1	7.9e-05	Down
AT1G07520	GRAS family transcription factor	5.69	4.17	6.57	6.47	10.01	10.23	11.81	17.09	-1	0.00013	Down
AT5G22860	Serine carboxypeptidase S28 family protein	5.62	3.68	12.09	18.59	20.68	18.69	21.38	23.2	-1	0.043	Down
AT3G22460	O-acetylserine (thiol) lyase (OAS-TL) isoform A2	4.97	2.23	3.42	6.45	11.41	8.91	6.52	9.09	-1	0.0069	Down
AT3G26440	Protein of unknown function (DUF707)	4.41	3.7	6.66	7.96	11.06	12.69	9.95	14.12	-1	0.00042	Down
AT1G46768	related to AP2 1	3.94	4.35	8.44	12.34	19.13	11.72	17.16	13	-1	0.027	Down
AT1G14480	Ankyrin repeat family protein	3.62	2.12	1.99	2.48	5.2	5	3.28	8.64	-1	0.013	Down
ATMG00090	structural constituent of ribosome;protein binding	3.6	3.4	3.71	4.09	9.87	7.74	6.27	8.12	-1	4.1e-08	Down
AT2G41210	phosphatidylinositol- 4-phosphate 5-kinase 5	3.13	1.77	4.03	4.96	7.29	12.18	5.31	4.65	-1	0.024	Down
AT5G66790	Protein kinase superfamily protein	3.04	2.48	2.99	4.24	8.46	4.93	5.93	8.16	-1	0.00031	Down
AT2G16570	GLN phosphoribosyl pyrophosphate amidotransferase 1	3.01	1.71	5.29	4.78	8.93	7.93	6.7	7.68	-1	0.0068	Down
AT5G01940	eukaryotic translation initiation factor 2B family protein / eIF-2B family protein	2.9	1.4	2.55	4.44	5.9	7.73	4.35	6.3	-1	0.014	Down
AT4G19370	Protein of unknown function (DUF1218)	2.2	3	5.53	7.26	12.63	8.62	7.66	9.67	-1	0.018	Down
AT1G06440	Ubiquitin carboxyl-terminal hydrolase family protein	1.9	0.85	1.42	1.39	2.11	2.88	3.83	3.09	-1	0.009	Down
AT2G35030	Pentatricopeptide repeat (PPR) superfamily protein	1.68	0.87	1.76	2.07	2.64	3.88	3.57	3.22	-1	0.0031	Down
AT4G24670	tryptophan aminotransferase related 2	1.15	1.58	2.18	1.27	1.7	4.04	4.01	3.19	-1	0.016	Down
AT2G43670	Carbohydrate-binding X8 domain superfamily protein	0.73	1.09	1.06	1.61	2.63	2.55	2.75	1.65	-1	0.042	Down
AT1G13970	Protein of unknown function (DUF1336)	0.65	0.31	1.08	0.68	1.63	1.42	1.22	1.51	-1	0.018	Down
AT2G22190	Haloacid dehalogenase-like hydrolase (HAD) superfamily protein	0.57	2.03	2	1.74	3.11	3.99	2.44	4	-1	0.036	Down
AT5G37770	EF hand calcium-binding protein family	122.4	94.38	115.91	65.51	245.83	264.56	153.78	249.57	-1.1	8.8e-05	Down
AT1G54575		108.97	53.83	144.37	204.09	333.3	270.74	242.99	266.05	-1.1	0.0053	Down
AT5G59780	myb domain protein 59	59.22	16.3	53.11	68.57	148.16	114.64	78.13	87.67	-1.1	0.019	Down
AT5G42800	dihydroflavonol 4-reductase	46.97	29.42	108.25	119.81	171.48	170.41	108.92	223.1	-1.1	0.025	Down
AT4G22880	leucoanthocyanidin dioxygenase	45.35	24.1	100.03	119.15	166.44	132.89	100.61	223.03	-1.1	0.048	Down
AT5G26030	ferrochelatase 1	40.7	26.81	39.04	33.19	72.14	66.92	53.44	122.59	-1.1	0.00031	Down
AT2G41010	calmodulin (CAM)-binding protein of 25 kDa	36.05	28.88	30.52	30.02	80.99	62.67	60.4	77.48	-1.1	2.7e-11	Down
AT1G42990	basic region/leucine zipper motif 60	34.13	28.82	32.38	32.41	70.08	58.6	60.93	93.88	-1.1	4.5e-08	Down
AT1G10140	Uncharacterised conserved protein UCP031279	32.83	10.61	27.5	31.34	68.27	45.48	55.97	59.18	-1.1	0.0026	Down
AT4G33920	Protein phosphatase 2C family protein	28.8	27.02	36.57	37.1	73.44	72.51	54.73	89.48	-1.1	4.2e-08	Down
AT3G50910		27.81	23.59	47.22	45.85	86.83	88.89	68.76	89.24	-1.1	1.3e-05	Down
AT3G27210		24.76	15.05	35.05	29.8	71.23	55.6	39.66	61.68	-1.1	0.00052	Down
AT1G33600	Leucine-rich repeat (LRR) family protein	24.32	11.24	20.32	16.33	39.21	25.75	44.67	47.34	-1.1	0.00098	Down
AT1G77450	NAC domain containing protein 32	23.97	5.46	27.03	28.35	56.29	32.52	36.25	64.58	-1.1	0.036	Down
AT4G16950	Disease resistance protein (TIR-NBS-LRR class) family	23.95	20.64	31.95	30.55	57.48	62.36	56.03	69.66	-1.1	6e-11	Down
AT5G04720	ADR1-like 2	23.95	19.95	27.26	31.67	48.54	51.46	52.03	76.57	-1.1	1.1e-06	Down
AT1G51700	DOF zinc finger protein 1	23.2	15.48	21.88	28.39	45.09	43.01	45.96	68.86	-1.1	1.1e-05	Down
AT1G70000	myb-like transcription factor family protein	22.21	34.59	71.77	66.97	120.2	121.08	88.58	101.93	-1.1	0.0065	Down
AT5G62770	Protein of unknown function (DUF1645)	21.1	15.52	20.12	24.34	56.94	35.32	34.85	58.22	-1.1	1.6e-05	Down
AT5G16970	alkenal reductase	17.42	11.11	24.17	24.78	57.83	40.59	38.18	40.9	-1.1	8.9e-05	Down
AT1G51660	mitogen-activated protein kinase kinase 4	16.74	16.82	19.86	21.75	42.03	36.86	39.03	46.98	-1.1	9.8e-13	Down
AT1G13210	autoinhibited Ca2+/ATPase II	16.37	8.84	17.15	16.72	32.69	25.92	25.9	49.39	-1.1	0.0004	Down
AT3G62720	xylosyltransferase 1	15.75	15.25	10.74	8.47	23.57	23.67	19.39	48.9	-1.1	0.006	Down
AT1G67940	non-intrinsic ABC protein 3	14.95	8.81	19.2	21.27	37.7	38.7	28.78	33.36	-1.1	0.00028	Down
AT3G19660		14.31	10.57	13.79	21.5	39.74	41.29	25.21	30.99	-1.1	0.00015	Down
AT5G62900		13.89	6.91	13.62	13.39	30.99	30.92	16.01	26.07	-1.1	0.0012	Down
AT2G31955	cofactor of nitrate reductase and xanthine dehydrogenase 2	10.76	8.75	17.96	15.86	31.14	30.82	24.37	32.92	-1.1	2.4e-05	Down
AT3G58760	Integrin-linked protein kinase family	10.59	10.59	14.75	12.52	26.16	29.93	21.37	28.33	-1.1	3.6e-09	Down
AT2G15080	receptor like protein 19	10.49	4.27	6.02	7.02	16.35	14.36	11.48	20.08	-1.1	0.00083	Down
AT3G51895	sulfate transporter 3;1	8.88	19.97	19.71	19.62	39.35	45.13	34.9	36.46	-1.1	0.00021	Down
AT3G11840	plant U-box 24	8.77	6.72	10.58	9.75	18.73	16.74	18.69	25.2	-1.1	8.4e-07	Down
AT3G02800	Tyrosine phosphatase family protein	8.66	5.44	8.78	13.35	15.77	19.81	19.7	26.63	-1.1	0.00043	Down
AT4G02200	Drought-responsive family protein	8.66	8.09	9.19	9.35	18.59	19.97	14.6	27.21	-1.1	1.4e-06	Down
AT5G47100	calcineurin B-like protein 9	8.31	10.82	14.47	11.2	24.84	30.47	17.26	25.22	-1.1	5e-05	Down
AT4G18010	myo-inositol polyphosphate 5-phosphatase 2	8.07	3.73	7.37	6.72	11.71	11.63	9.84	23.89	-1.1	0.0063	Down
AT4G10730	Protein kinase superfamily protein	8.05	8.12	11.52	11.14	22.08	22.45	20.62	20.61	-1.1	8.3e-12	Down
AT1G21010		7.98	8.64	10.24	9.54	17.71	21.59	17.31	22.79	-1.1	1.3e-07	Down
AT1G49320	unknown seed protein like 1	7.55	5.29	13.32	11.77	27.47	22.56	19.99	16.59	-1.1	0.00077	Down
AT4G31870	glutathione peroxidase 7	7.17	4.9	7.86	7.94	20.36	14.12	12.72	17.06	-1.1	2.8e-06	Down
AT2G18300	basic helix-loop-helix (bHLH) DNA-binding superfamily protein	6.9	8.48	8.52	4.01	15.28	26.32	11.74	9.25	-1.1	0.015	Down
AT1G07500		6.65	5.1	9.61	16.49	25.34	20.07	12.27	26.94	-1.1	0.032	Down
AT3G57540	Remorin family protein	6.26	6.47	10.59	11.43	20.18	17.65	19.97	22.47	-1.1	7e-06	Down
AT3G56410	Protein of unknown function (DUF3133)	6.09	4.31	7.7	8.99	12.85	13.06	13.85	20.64	-1.1	0.00013	Down
AT3G54000		4.99	8.24	4.63	5.5	8.58	10.12	8.98	23.73	-1.1	0.023	Down
AT5G39020	Malectin/receptor-like protein kinase family protein	4.72	1.87	4.22	2.3	6.43	5.29	6.28	10.84	-1.1	0.013	Down
AT1G63720		4.48	3.37	5.32	6.28	11.54	9.22	9.89	14	-1.1	1.6e-05	Down
AT1G71030	MYB-like 2	4.08	2.41	6.89	9.55	18.22	9.54	8.43	16.09	-1.1	0.026	Down
AT1G08400	RINT-1 / TIP-1 family	4.01	3.93	6.42	5.12	12.56	12.14	10.15	9.67	-1.1	2.1e-07	Down
AT5G04250	Cysteine proteinases superfamily protein	3.98	2.04	3.92	3.8	8.92	9.08	5.39	7.84	-1.1	0.00016	Down
AT4G28350	Concanavalin A-like lectin protein kinase family protein	3.91	2.02	5.21	6.08	9.19	7.48	11.47	10.06	-1.1	0.0029	Down
AT4G16960	Disease resistance protein (TIR-NBS-LRR class) family	3.73	2.05	3.84	4.65	8.58	7.65	6.52	9.4	-1.1	4.5e-05	Down
AT3G47090	Leucine-rich repeat protein kinase family protein	3.62	1.37	2.76	2.63	5.33	4.19	5.27	8.84	-1.1	0.0045	Down
AT3G55560	AT-hook protein of GA feedback 2	3.42	0.89	1.55	2.56	5.87	4.92	3.73	4.47	-1.1	0.018	Down
AT1G32900	UDP-Glycosyltransferase superfamily protein	3.23	2.94	9.45	8.21	9.23	13.9	12.02	19.49	-1.1	0.018	Down
AT1G15170	MATE efflux family protein	2.93	2.02	3.59	4.2	8.45	4.3	7.47	7.52	-1.1	0.0017	Down
AT2G20180	phytochrome interacting factor 3-like 5	2.76	2.21	3.19	4.12	7.48	7.75	6.46	6.37	-1.1	5.1e-07	Down
AT4G39270	Leucine-rich repeat protein kinase family protein	2.72	0.85	2.27	3.63	6.86	4.83	3.24	6.25	-1.1	0.022	Down
AT4G05110	equilibrative nucleoside transporter 6	2.67	1.29	3.13	2.92	6.1	4.81	5.15	6.51	-1.1	0.00038	Down
AT5G08400	Protein of unknown function (DUF3531)	2.67	2.47	4.6	5.31	8.69	9.12	6.88	8.42	-1.1	0.00041	Down
AT3G23790	AMP-dependent synthetase and ligase family protein	2.52	2.2	4.05	5.71	9.25	8.07	7.08	8.71	-1.1	0.00048	Down
AT1G33030	O-methyltransferase family protein	2.4	0.81	1.76	3.57	3.69	5.04	3.24	6.51	-1.1	0.046	Down
AT1G21890	nodulin MtN21 /EamA-like transporter family protein	2.34	7.12	7.99	15.86	18.33	24.68	16.86	16.53	-1.1	0.035	Down
AT2G35550	basic pentacysteine 7	2.04	1.51	3.39	2.88	6.61	6.26	4.28	5.24	-1.1	0.00068	Down
AT1G18390	Protein kinase superfamily protein	2.01	1.06	2.18	2.52	5.39	3.49	3.04	5.45	-1.1	0.0019	Down
AT3G49210	O-acyltransferase (WSD1-like) family protein	1.84	1.86	2.71	2.89	6.72	3.97	4.59	6.15	-1.1	6.9e-05	Down
AT4G34131	UDP-glucosyl transferase 73B3	1.7	0.69	1.55	2.67	2.63	2.86	3.39	5.34	-1.1	0.039	Down
AT1G78030		1.39	1.45	2.7	2.9	5.31	5.56	3.36	4.41	-1.1	0.0041	Down
AT5G02400	pol-like 2	1.2	0.55	2	2.46	4.13	3.62	2.9	3.54	-1.1	0.017	Down
AT5G65610		1.17	1.21	1.54	2.55	4.77	4.04	2.5	3.15	-1.1	0.0073	Down
AT4G13920	receptor like protein 50	1.15	0.7	1.82	1.64	3.39	2.15	2.52	3.66	-1.1	0.006	Down
AT1G61460	S-locus protein kinase, putative	0.92	0.53	1.2	0.72	1.26	1.94	1.21	3.06	-1.1	0.026	Down
AT2G41660	Protein of unknown function, DUF617	0.85	1.2	2.13	2.31	3.53	3.47	3.56	3.6	-1.1	0.0092	Down
AT3G15150	RING/U-box superfamily protein	0.82	0.63	1.47	1.17	2.94	1.61	2.06	2.34	-1.1	0.0096	Down
AT3G50940	P-loop containing nucleoside triphosphate hydrolases superfamily protein	0.79	1.58	2.1	2.48	3.05	4.51	3.46	3.97	-1.1	0.013	Down
AT3G44320	nitrilase 3	0.78	0.47	0.54	0.42	1.41	1.4	0.66	1.5	-1.1	0.03	Down
AT3G58590	Pentatricopeptide repeat (PPR) superfamily protein	0.62	0.65	0.73	1.24	1.38	1.8	1.91	2.08	-1.1	0.0044	Down
AT1G09480	NAD(P)-binding Rossmann-fold superfamily protein	0.52	0.48	0.79	1.01	2.13	1.66	0.8	1.72	-1.1	0.023	Down
AT1G69350	Tetratricopeptide repeat (TPR)-like superfamily protein	0.41	0.48	0.56	0.9	0.85	1.71	1.51	1.18	-1.1	0.022	Down
AT5G66870	ASYMMETRIC LEAVES 2-like 1	0.39	0.18	0.25	0.44	0.68	0.94	0.57	0.71	-1.1	0.03	Down
AT4G34360	S-adenosyl-L-methionine-dependent methyltransferases superfamily protein	0.27	0.74	0.79	0.83	1.25	1.34	1.83	1.38	-1.1	0.032	Down
AT1G09070	soybean gene regulated by cold-2	348.17	98.88	159.55	130.47	462.04	406.49	242.75	614.71	-1.2	0.015	Down
AT5G21940		106.89	51.06	56.35	94.46	176.11	188.75	183.76	184.24	-1.2	8.2e-06	Down
AT2G24550		105.27	37.69	42.63	55.77	126.2	146.87	149.64	149.4	-1.2	0.00077	Down
AT1G19770	purine permease 14	104.98	76.97	117.26	126.31	232.76	205.65	216.53	344.53	-1.2	1e-06	Down
AT1G69870	nitrate transporter 1.7	94.87	41.93	109.55	92.79	213.42	183.07	146.01	291.27	-1.2	0.00036	Down
AT3G13110	serine acetyltransferase 2;2	63.1	38.1	120.33	82.86	171.83	189.73	144.74	213.02	-1.2	0.00077	Down
AT5G10695		58.82	30.26	40.06	26.07	144.86	83.65	60.92	96.58	-1.2	0.0011	Down
AT4G37260	myb domain protein 73	57.46	18.47	36.88	38.84	79.55	72.69	74.31	141.44	-1.2	0.0022	Down
AT5G49480	Ca2+-binding protein 1	51.6	55.6	93.68	69.68	161.44	197.82	141.23	133.45	-1.2	2.4e-06	Down
AT4G24380		42.93	18.55	22.47	15.29	60.19	52.83	31.18	95.06	-1.2	0.011	Down
AT2G43120	RmlC-like cupins superfamily protein	42.64	24.38	59.73	63.93	120.35	127.03	94.85	125.58	-1.2	4.8e-05	Down
AT5G59730	exocyst subunit exo70 family protein H7	41.83	20.75	44.08	28.71	58.45	46.81	51.67	164.84	-1.2	0.019	Down
AT4G23180	cysteine-rich RLK (RECEPTOR-like protein kinase) 10	41.77	18.43	24.91	17.72	53.78	39.31	62.42	99.65	-1.2	0.0026	Down
AT5G58430	exocyst subunit exo70 family protein B1	36.43	26.98	39.37	42.2	81.96	79.6	69.06	105.96	-1.2	7.4e-09	Down
AT4G17230	SCARECROW-like 13	36.36	15.78	30.27	24.43	54.77	47.17	48.97	113.66	-1.2	0.0018	Down
AT5G46730	glycine-rich protein	31.74	48.95	63.89	73.77	69.38	125.39	151.76	158.74	-1.2	0.0023	Down
AT1G27770	autoinhibited Ca2+-ATPase 1	31.36	14.49	14.12	16.15	35.56	38.28	33.85	73.3	-1.2	0.0032	Down
AT2G46510	ABA-inducible BHLH-type transcription factor	29.02	10.15	23.88	14.77	46.19	38.01	24.76	73.01	-1.2	0.012	Down
AT1G76520	Auxin efflux carrier family protein	23.58	23.34	39.24	41.5	75.48	72.8	69.18	82.61	-1.2	6e-07	Down
AT5G26340	Major facilitator superfamily protein	22.25	12.76	20.38	20.91	44.04	27.26	37.96	69.45	-1.2	0.00057	Down
AT3G29350	histidine-containing phosphotransmitter 2	22.14	17.61	23.92	18.89	44.78	62.82	39.5	51.18	-1.2	4.7e-09	Down
AT3G19000	2-oxoglutarate (2OG) and Fe(II)-dependent oxygenase superfamily protein	18.57	30.2	54.24	53.54	96.43	100.86	89.07	79.9	-1.2	0.0012	Down
AT2G30100	pentatricopeptide (PPR) repeat-containing protein	17.98	17.16	32.98	19.15	55.81	53.99	39.81	59.57	-1.2	1.3e-05	Down
AT5G40780	lysine histidine transporter 1	17.37	11.4	16.34	15.01	38.56	24.37	19.91	62.65	-1.2	0.0023	Down
AT5G54720	Ankyrin repeat family protein	16	10.02	16	14.35	24.25	31.4	33.93	46.41	-1.2	2e-05	Down
AT5G66675	Protein of unknown function (DUF677)	14.48	9.58	15.25	13.59	30	25.49	27.4	44.88	-1.2	3e-06	Down
AT4G24020	NIN like protein 7	14.32	18.96	32.8	27.78	53.43	63.5	50.49	50.59	-1.2	4.8e-05	Down
AT1G49310		14.25	5.79	14.67	15.58	38.24	42.41	17.44	19.6	-1.2	0.013	Down
AT4G37180	Homeodomain-like superfamily protein	13.15	7.24	9.97	6.97	29.11	29.63	16.66	16.02	-1.2	0.00039	Down
AT4G22780	ACT domain repeat 7	12.76	10.08	13.9	18	29.23	27.23	26.67	46.15	-1.2	1.2e-05	Down
AT4G33980		12.28	14.1	18.05	19.7	36.51	40.43	35.95	37.56	-1.2	4.9e-11	Down
AT1G65500		11.96	3.52	3.88	6.02	17.57	14.24	6.24	22.51	-1.2	0.047	Down
AT2G46420	Plant protein 1589 of unknown function	11.73	17.78	21.66	16.13	37.63	48.42	34.46	47.43	-1.2	3.9e-07	Down
AT4G16860	Disease resistance protein (TIR-NBS-LRR class) family	11.38	13.71	19.32	16.48	34.31	36.59	33.25	45.6	-1.2	8.7e-09	Down
AT1G17020	senescence-related gene 1	11.1	4.93	10.78	17.41	24.81	27.65	22.1	33.76	-1.2	0.00083	Down
AT4G24660	homeobox protein 22	11.04	6.54	15.07	18.66	29.33	34.42	25.73	31.89	-1.2	0.0003	Down
AT1G26960	homeobox protein 23	10.61	16.02	27.46	21.89	57.97	42.99	33.41	44.06	-1.2	0.00058	Down
AT4G01840	Ca2+ activated outward rectifying K+ channel 5	10.55	12	19.71	18.5	39.46	39.22	34.93	36.46	-1.2	1.2e-07	Down
AT2G46270	G-box binding factor 3	9.82	5.06	11.11	8.67	23.92	21.68	15.37	22.36	-1.2	1.4e-05	Down
AT2G38820	Protein of unknown function (DUF506)	9.08	8.32	14.24	11.58	27.97	33.14	24.87	19.94	-1.2	8.3e-07	Down
AT3G29590	HXXXD-type acyl-transferase family protein	8.68	10.31	32.52	36.64	57.82	45.2	34.71	65.63	-1.2	0.033	Down
AT5G56860	GATA type zinc finger transcription factor family protein	7.92	13.54	17.09	14.93	31.41	30.02	43.69	23.65	-1.2	0.00017	Down
AT4G32810	carotenoid cleavage dioxygenase 8	7.84	6.92	13.77	37.28	35.6	28.09	45.11	45.44	-1.2	0.037	Down
AT2G42620	RNI-like superfamily protein	7.57	6.34	12.34	11.94	25.14	24.06	22.79	17.97	-1.2	8.2e-06	Down
AT1G25520	Uncharacterized protein family (UPF0016)	7.37	8.07	12.1	12.74	24.45	23.66	20.19	27.08	-1.2	2.8e-07	Down
AT1G70740	Protein kinase superfamily protein	7.37	5.41	6.13	6.37	13.55	11.86	11.79	24.57	-1.2	9.6e-05	Down
AT1G59730	thioredoxin H-type 7	6.74	6.76	11.46	11.21	20.9	27.52	19.38	21.18	-1.2	4.1e-06	Down
AT5G26622	Beta-galactosidase related protein	6.49	6.66	12.34	10.4	21.95	25.57	20.96	19.09	-1.2	3.3e-06	Down
AT3G57640	Protein kinase superfamily protein	5.48	3.35	4.84	3.85	15.43	9.09	7.59	10.86	-1.2	0.00015	Down
AT5G19040	isopentenyltransferase 5	5.42	2.49	10.34	11.41	20.22	14.51	19.09	16.98	-1.2	0.011	Down
AT2G03530	ureide permease 2	5.16	5.14	12.65	15.13	24.57	22.07	16.79	25.45	-1.2	0.0056	Down
AT4G36930	basic helix-loop-helix (bHLH) DNA-binding superfamily protein	5.12	4.02	6.18	7.41	17.58	12.69	11.19	12.58	-1.2	1.8e-06	Down
AT1G05300	zinc transporter 5 precursor	4.85	2.57	4.14	4.4	11.58	8.77	8.48	8.74	-1.2	9.1e-07	Down
AT1G63270	non-intrinsic ABC protein 10	4.81	5.31	9.3	7.74	19.3	17.45	12.48	15.93	-1.2	1.8e-05	Down
AT5G64800	CLAVATA3/ESR-RELATED 21	4.37	7.78	4.12	10.45	15.04	15.72	19.18	16.46	-1.2	0.0028	Down
AT3G57770	Protein kinase superfamily protein	4.28	2.34	4.37	5.11	11.04	8.99	7.37	10.32	-1.2	7.7e-05	Down
AT2G07774		4.23	2.91	5.02	6.63	10.21	10.53	11.2	11.57	-1.2	8.2e-05	Down
AT2G38465		4.22	3.4	8.8	9.11	14.99	15.95	13.81	17.91	-1.2	0.0013	Down
AT2G40330	PYR1-like 6	4.1	2.4	3.13	2.65	5.07	5.48	7.99	11	-1.2	0.0028	Down
AT5G46080	Protein kinase superfamily protein	3.99	2.22	3.48	3.28	6.8	6.78	6.92	11.63	-1.2	0.00016	Down
AT1G80160	Lactoylglutathione lyase / glyoxalase I family protein	3.49	1.38	3.27	5.92	10.84	7.61	5.49	9.46	-1.2	0.013	Down
AT3G52430	alpha/beta-Hydrolases superfamily protein	3.24	2.49	2.56	3.25	7.66	5.34	4.65	9.97	-1.2	0.00016	Down
AT1G71140	MATE efflux family protein	3.21	0.79	3.57	4.79	7.19	6	6.95	8.41	-1.2	0.023	Down
AT1G49170	Protein of unknown function (DUF167)	2.74	4.48	3.52	5.58	11.19	13.75	8.05	7.84	-1.2	0.00032	Down
AT5G17880	disease resistance protein (TIR-NBS-LRR class)	2.66	2.52	2.92	2.81	7.4	6.58	6.67	6.32	-1.2	8.4e-21	Down
AT5G52830	WRKY DNA-binding protein 27	2.29	3.21	8.88	8.88	18.65	16.31	11.25	8.16	-1.2	0.035	Down
AT3G55160		2.27	2.03	3.02	4.52	6.81	6.93	6.62	7.27	-1.2	1.4e-05	Down
AT3G62090	phytochrome interacting factor 3-like 2	2.26	1.62	3.26	6.44	7.16	10.14	7.77	7.78	-1.2	0.0069	Down
AT3G52170	DNA binding	2.24	1.74	2.79	3.45	6.15	6.88	4.91	6.11	-1.2	5e-06	Down
AT2G43580	Chitinase family protein	1.99	0.52	1.79	2.71	3.13	2.98	5.27	5.72	-1.2	0.028	Down
AT5G61430	NAC domain containing protein 100	1.97	2.44	6.4	7.9	12.88	13.67	8.82	8.96	-1.2	0.021	Down
AT1G03650	Acyl-CoA N-acyltransferases (NAT) superfamily protein	1.88	1.04	0.98	2.2	6.1	3.06	3.52	2.33	-1.2	0.018	Down
AT1G70640	octicosapeptide/Phox/Bem1p (PB1) domain-containing protein	1.54	2.86	6.06	6.13	13.02	11.76	5.64	8	-1.2	0.042	Down
AT3G48390	MA3 domain-containing protein	1.41	0.35	1.48	1.59	3.26	2.73	2.96	2.51	-1.2	0.012	Down
AT5G50800	Nodulin MtN3 family protein	1.4	2.69	2.26	0.98	5.64	4.58	2.43	5.21	-1.2	0.013	Down
AT2G15480	UDP-glucosyl transferase 73B5	1.39	1.02	1.48	2.29	2.92	3.6	3.46	4.71	-1.2	0.00011	Down
AT1G77880	Galactose oxidase/kelch repeat superfamily protein	1.2	0.73	1.97	1.77	5.69	4.03	1.43	2.66	-1.2	0.047	Down
AT3G55060		1.14	1.09	1.3	1.11	2.87	3.08	2.41	3.18	-1.2	2.2e-09	Down
AT3G61113	Ubiquitin related modifier 1	1.1	1.28	1.27	1.16	3.38	3.17	1.48	3.35	-1.2	0.021	Down
AT2G42395		1.09	1.19	1.38	1.22	3.03	4.25	1.37	2.91	-1.2	0.028	Down
AT4G09820	basic helix-loop-helix (bHLH) DNA-binding superfamily protein	1	0.54	2.23	2.55	4.03	3.62	3.04	4.47	-1.2	0.016	Down
AT2G16380	Sec14p-like phosphatidylinositol transfer family protein	0.9	0.3	0.68	1.11	2.03	1.77	1.44	1.73	-1.2	0.0078	Down
[truncated: 629 more rows]

## Sheet: GO enrichment
					FDR				Enrichment
Classification	GO_ID	Description			All_DEG	Up_DEG	Down_DEG		All_DEG	Up_DEG	Down_DEG
cell wall	GO:0071554	cell wall organization or biogenesis			12.33	14.245	NA		2.807	3.526	NA
cell wall	GO:0071669	plant-type cell wall organization or biogenesis			8.475	10.645	NA		3.195	4.222	NA
cell wall	GO:0009834	secondary cell wall biogenesis			7.654	9.87	NA		7.155	10.536	NA
cell wall	GO:0042545	cell wall modification			6.616	6.921	NA		2.935	3.581	NA
cell wall	GO:0042546	cell wall biogenesis			6.463	9.061	NA		3.532	5.001	NA
cell wall	GO:0070882	cellular cell wall organization or biogenesis			6.14	8.861	NA		3.331	4.723	NA
cell wall	GO:0071555	cell wall organization			6.099	6.633	NA		2.602	3.161	NA
cell wall	GO:0009827	plant-type cell wall modification			5.498	5.371	NA		4.2	5.154	NA
cell wall	GO:0009828	plant-type cell wall loosening			4.309	4.521	NA		4.293	5.419	NA
cell wall	GO:0009664	plant-type cell wall organization			4.233	4.348	NA		3.027	3.647	NA
cell wall	GO:0042547	cell wall modification involved in multidimensional cell growth			3.993	5.569	NA		4.6	6.773	NA
cell wall	GO:0009832	plant-type cell wall biogenesis			3.799	5.951	NA		3.22	4.741	NA
cell wall	GO:0010383	cell wall polysaccharide metabolic process			3.317	4.524	NA		5.084	7.486	NA
cell wall	GO:0044038	cell wall macromolecule biosynthetic process			3.173	4.17	NA		6.261	9.219	NA
cell wall	GO:0070592	cell wall polysaccharide biosynthetic process			3.173	4.17	NA		6.261	9.219	NA
cell wall	GO:0044036	cell wall macromolecule metabolic process			2.959	3.133	NA		3.403	4.24	NA
cell wall	GO:0009831	plant-type cell wall modification involved in multidimensional cell growth			2.907	4.201	NA		4.128	6.079	NA
cell wall	GO:0010382	cellular cell wall macromolecule metabolic process			2.682	3.612	NA		5.366	7.902	NA
Hormone	GO:0009725	response to hormone stimulus			12.33	5.325	6.47		1.973	1.793	2.355
Hormone	GO:0009733	response to auxin stimulus			5.247	6.633	NA		2.093	2.578	NA
Hormone	GO:0009753	response to jasmonic acid stimulus			4.187	NA	5.413		2.393	NA	4.294
Hormone	GO:0009737	response to abscisic acid stimulus			1.53	NA	6.144		1.578	NA	3.443
Hormone	GO:0009723	response to ethylene stimulus			1.528	NA	4.48		1.889	NA	4.281
Hormone	GO:0009741	response to brassinosteroid stimulus			1.498	1.313	NA		2.43	2.684	NA
Hormone	GO:0009751	response to salicylic acid stimulus			1.473	NA	3.519		1.829	NA	3.716
Hormone	GO:0032870	cellular response to hormone stimulus			1.412	NA	2.135		1.608	NA	2.505
Hormone	GO:0009739	response to gibberellin stimulus			1.363	NA	1.363		1.906	NA	2.813
Hormone	GO:0071369	cellular response to ethylene stimulus			NA	NA	2.861		NA	NA	5.693
Hormone	GO:0071395	cellular response to jasmonic acid stimulus			NA	NA	2.602		NA	NA	6.003
Hormone	GO:0071215	cellular response to abscisic acid stimulus			NA	NA	1.363		NA	NA	3.786
Stress	GO:0050896	response to stimulus			23.524	2.513	33.245		1.6	1.237	2.367
Stress	GO:0010033	response to organic substance			21.219	4.196	21.515		2.101	1.585	3.193
Stress	GO:0042221	response to chemical stimulus			19.276	1.94	26.817		1.783	1.294	2.817
Stress	GO:0009719	response to endogenous stimulus			14.647	5.904	8.27		2.018	1.798	2.484
Stress	GO:0009628	response to abiotic stimulus			10.582	1.944	11.205		1.709	1.367	2.434
Stress	GO:0006950	response to stress			7.013	NA	25.329		1.442	NA	2.671
Stress	GO:0009611	response to wounding			4.745	NA	8.898		2.582	NA	5.784
Stress	GO:0009607	response to biotic stimulus			4.078	NA	8.843		1.659	NA	2.98
Stress	GO:0051707	response to other organism			4.003	NA	8.436		1.667	NA	2.977
Stress	GO:0009414	response to water deprivation			3.898	NA	5.624		2.169	NA	3.914
Stress	GO:0050832	defense response to fungus			3.677	NA	6.216		2.477	NA	5.146
Stress	GO:0009415	response to water			3.558	NA	5.362		2.081	NA	3.754
Stress	GO:0009409	response to cold			3.538	NA	4.996		1.96	NA	3.331
Stress	GO:0009620	response to fungus			3.411	NA	6.339		2.202	NA	4.503
Stress	GO:0009612	response to mechanical stimulus			3.322	NA	1.948		5.724	NA	8.919
Stress	GO:0006952	defense response			3.221	NA	12.03		1.533	NA	3.15
Stress	GO:0006970	response to osmotic stress			3.121	NA	5.023		1.687	NA	2.759
Stress	GO:0009266	response to temperature stimulus			2.312	NA	4.79		1.614	NA	2.795
Stress	GO:0009651	response to salt stress			2.29	NA	5.24		1.61	NA	2.88
Stress	GO:0071495	cellular response to endogenous stimulus			2.252	NA	4.13		1.732	NA	3.029
Stress	GO:0042538	hyperosmotic salinity response			1.306	NA	1.723		2.496	NA	4.667
Stress	GO:0006955	immune response			NA	NA	7.747		NA	NA	3.812
Stress	GO:0045087	innate immune response			NA	NA	7.224		NA	NA	3.774
Stress	GO:0009814	defense response, incompatible interaction			NA	NA	4.09		NA	NA	4.46
Stress	GO:0080134	regulation of response to stress			NA	NA	4.06		NA	NA	5.146
Stress	GO:0042742	defense response to bacterium			NA	NA	3.831		NA	NA	3.293
Stress	GO:0009617	response to bacterium			NA	NA	3.519		NA	NA	2.914
Stress	GO:0031347	regulation of defense response			NA	NA	3.318		NA	NA	5.146
Stress	GO:0051716	cellular response to stimulus			NA	NA	3.029		NA	NA	1.927
Stress	GO:0048583	regulation of response to stimulus			NA	NA	2.813		NA	NA	3.196
Stress	GO:0006979	response to oxidative stress			NA	NA	2.146		NA	NA	2.437
Stress	GO:0009816	defense response to bacterium, incompatible interaction			NA	NA	1.866		NA	NA	6.194
Stress	GO:0002682	regulation of immune system process			NA	NA	1.81		NA	NA	4.895
Stress	GO:0050776	regulation of immune response			NA	NA	1.81		NA	NA	4.895
Stress	GO:0009605	response to external stimulus			NA	NA	1.753		NA	NA	2.337
Stress	GO:0009408	response to heat			NA	NA	1.684		NA	NA	2.809
Stress	GO:0031349	positive regulation of defense response			NA	NA	1.661		NA	NA	5.395
Stress	GO:0048585	negative regulation of response to stimulus			NA	NA	1.464		NA	NA	3.547
Stress	GO:0006972	hyperosmotic response			NA	NA	1.425		NA	NA	3.935
Stress	GO:0009817	defense response to fungus, incompatible interaction			NA	NA	1.416		NA	NA	4.645
Metabolism	GO:0005975	carbohydrate metabolic process			12.95	15.067	NA		1.99	2.365	NA
Metabolism	GO:0019748	secondary metabolic process			10.431	5.1	4.56		2.439	2.251	2.838
Metabolism	GO:0044262	cellular carbohydrate metabolic process			6.702	6.718	NA		1.981	2.252	NA
Metabolism	GO:0009698	phenylpropanoid metabolic process			6.696	4.971	NA		2.905	3.09	NA
Metabolism	GO:0006725	cellular aromatic compound metabolic process			5.617	2.351	3.153		2.103	1.869	2.599
Metabolism	GO:0010166	wax metabolic process			4.973	6.408	NA		6.708	9.878	NA
Metabolism	GO:0006575	cellular amino acid derivative metabolic process			4.954	3.589	NA		2.184	2.258	NA
Metabolism	GO:0016137	glycoside metabolic process			4.464	3.725	NA		2.961	3.27	NA
Metabolism	GO:0016143	S-glycoside metabolic process			4.27	2.793	NA		3.816	3.863	NA
Metabolism	GO:0019757	glycosinolate metabolic process			4.27	2.793	NA		3.816	3.863	NA
Metabolism	GO:0019760	glucosinolate metabolic process			4.27	2.793	NA		3.816	3.863	NA
Metabolism	GO:0010410	hemicellulose metabolic process			3.836	4.971	NA		6.605	9.726	NA
Metabolism	GO:0045491	xylan metabolic process			3.836	4.971	NA		6.605	9.726	NA
Metabolism	GO:0010413	glucuronoxylan metabolic process			3.797	4.792	NA		7.513	11.063	NA
Metabolism	GO:0009808	lignin metabolic process			3.797	3.506	NA		3.659	4.31	NA
Metabolism	GO:0005976	polysaccharide metabolic process			3.774	4.705	NA		2.27	2.837	NA
Metabolism	GO:0044264	cellular polysaccharide metabolic process			3.624	4.264	NA		2.333	2.863	NA
Metabolism	GO:0006790	sulfur metabolic process			3.269	NA	2.146		2.134	NA	2.821
Metabolism	GO:0006519	cellular amino acid and derivative metabolic process			3.232	2.633	NA		1.622	1.701	NA
Metabolism	GO:0044281	small molecule metabolic process			3.204	2.093	NA		1.367	1.368	NA
Metabolism	GO:0016128	phytosteroid metabolic process			2.482	2.486	NA		5.009	6.322	NA
Metabolism	GO:0016131	brassinosteroid metabolic process			2.482	2.486	NA		5.009	6.322	NA
Metabolism	GO:0051171	regulation of nitrogen compound metabolic process			2.347	NA	7.467		1.278	NA	1.97
Metabolism	GO:0006796	phosphate metabolic process			2.234	NA	1.693		1.348	NA	1.572
Metabolism	GO:0019219	regulation of nucleobase, nucleoside, nucleotide and nucleic acid metabolic process			2.222	NA	6.819		1.272	NA	1.928
Metabolism	GO:0006793	phosphorus metabolic process			2.221	NA	1.687		1.347	NA	1.57
Metabolism	GO:0080090	regulation of primary metabolic process			2.096	NA	7.078		1.258	NA	1.918
Metabolism	GO:0031323	regulation of cellular metabolic process			2.07	NA	7.473		1.251	NA	1.93
Metabolism	GO:0042126	nitrate metabolic process			2.031	NA	4.13		5.963	NA	18.582
Metabolism	GO:0008202	steroid metabolic process			1.868	2.821	NA		2.504	3.424	NA
Metabolism	GO:0044042	glucan metabolic process			1.776	2.073	NA		2.031	2.42	NA
Metabolism	GO:0006629	lipid metabolic process			1.748	1.915	NA		1.411	1.531	NA
Metabolism	GO:0032787	monocarboxylic acid metabolic process			1.704	NA	NA		1.591	NA	NA
Metabolism	GO:0051252	regulation of RNA metabolic process			1.669	NA	7.208		1.333	NA	2.386
Metabolism	GO:0019752	carboxylic acid metabolic process			1.661	NA	NA		1.385	NA	NA
Metabolism	GO:0043436	oxoacid metabolic process			1.661	NA	NA		1.385	NA	NA
Metabolism	GO:0006082	organic acid metabolic process			1.645	NA	NA		1.383	NA	NA
Metabolism	GO:0009696	salicylic acid metabolic process			1.633	NA	NA		4.879	NA	NA
Metabolism	GO:0009812	flavonoid metabolic process			1.615	NA	1.425		2.525	NA	3.935
Metabolism	GO:0006073	cellular glucan metabolic process			1.603	1.85	NA		1.988	2.341	NA
Metabolism	GO:0042180	cellular ketone metabolic process			1.505	NA	NA		1.363	NA	NA
Metabolism	GO:0006631	fatty acid metabolic process			1.356	1.556	NA		1.695	1.941	NA
Metabolism	GO:0009129	pyrimidine nucleoside monophosphate metabolic process			NA	1.443	NA		NA	15.804	NA
Metabolism	GO:0030243	cellulose metabolic process			NA	1.443	NA		NA	3.352	NA
Metabolism	GO:0046085	adenosine metabolic process			NA	1.443	NA		NA	15.804	NA
Metabolism	GO:0019222	regulation of metabolic process			NA	NA	5.95		NA	NA	1.778
Metabolism	GO:0060255	regulation of macromolecule metabolic process			NA	NA	5.826		NA	NA	1.806
Metabolism	GO:0006714	sesquiterpenoid metabolic process			NA	NA	3.139		NA	NA	9.122
Metabolism	GO:0051761	sesquiterpene metabolic process			NA	NA	3.139		NA	NA	9.122
Metabolism	GO:0042214	terpene metabolic process			NA	NA	2.725		NA	NA	6.328
Metabolism	GO:0009687	abscisic acid metabolic process			NA	NA	2.589		NA	NA	9.291
Metabolism	GO:0043288	apocarotenoid metabolic process			NA	NA	2.589		NA	NA	9.291
Metabolism	GO:0046483	heterocycle metabolic process			NA	NA	2.051		NA	NA	2.164
Metabolism	GO:0046283	anthocyanin metabolic process			NA	NA	1.948		NA	NA	8.919
Metabolism	GO:0042430	indole and derivative metabolic process			NA	NA	1.81		NA	NA	4.895
Metabolism	GO:0042434	indole derivative metabolic process			NA	NA	1.81		NA	NA	4.895
Metabolism	GO:0052317	camalexin metabolic process			NA	NA	1.808		NA	NA	12.543
Metabolism	GO:0042440	pigment metabolic process			NA	NA	1.708		NA	NA	3.272
Metabolism	GO:0042431	indole metabolic process			NA	NA	1.684		NA	NA	11.149
Metabolism	GO:0046217	indole phytoalexin metabolic process			NA	NA	1.684		NA	NA	11.149
Metabolism	GO:0052314	phytoalexin metabolic process			NA	NA	1.684		NA	NA	11.149
Metabolism	GO:0006690	icosanoid metabolic process			NA	NA	1.577		NA	NA	22.298
Metabolism	GO:0042168	heme metabolic process			NA	NA	1.452		NA	NA	9.122
Metabolism	GO:0030417	nicotianamine metabolic process			NA	NA	1.363		NA	NA	16.724
Metabolism	GO:0046209	nitric oxide metabolic process			NA	NA	1.363		NA	NA	16.724

## Sheet: Mapman
BIN	BINCODE	NAME	IDENTIFIER	DESCRIPTION	log2FC	FDR	Up_or_Down
1	1.1.1.1	PS.lightreaction.photosystem II.LHC-II	AT1G15820	light harvesting complex photosystem II subunit 6	1.3	0.00033	Up
1	1.1.1.1	PS.lightreaction.photosystem II.LHC-II	AT1G29910	chlorophyll A/B binding protein 3	2.1	0.002	Up
1	1.1.1.1	PS.lightreaction.photosystem II.LHC-II	AT1G29920	chlorophyll A/B-binding protein 2	1.7	0.003	Up
1	1.1.1.1	PS.lightreaction.photosystem II.LHC-II	AT1G29930	chlorophyll A/B binding protein 1	2.7	8.4e-07	Up
1	1.1.1.1	PS.lightreaction.photosystem II.LHC-II	AT2G05070	photosystem II light harvesting complex protein 2.2	2.9	5e-06	Up
1	1.1.1.1	PS.lightreaction.photosystem II.LHC-II	AT2G05100	photosystem II light harvesting complex protein 2.1	2	1.6e-06	Up
1	1.1.1.1	PS.lightreaction.photosystem II.LHC-II	AT2G30990	arginine N-methyltransferase%2C putative (DUF688)	1.1	0.011	Up
1	1.1.1.1	PS.lightreaction.photosystem II.LHC-II	AT2G32030	Acyl-CoA N-acyltransferases (NAT) superfamily protein	-3	3.6e-15	Down
1	1.1.1.1	PS.lightreaction.photosystem II.LHC-II	AT2G34420	photosystem II light harvesting complex protein B1B2	1.3	0.00016	Up
1	1.1.1.1	PS.lightreaction.photosystem II.LHC-II	AT2G34430	light-harvesting chlorophyll-protein complex II subunit B1	3.7	0.00011	Up
1	1.1.1.1	PS.lightreaction.photosystem II.LHC-II	AT3G08940	light harvesting complex photosystem II	1.5	0.00034	Up
1	1.1.1.1	PS.lightreaction.photosystem II.LHC-II	AT3G27690	photosystem II light harvesting complex protein 2.3	3.8	9.6e-08	Up
1	1.1.1.1	PS.lightreaction.photosystem II.LHC-II	AT3G47470	light-harvesting chlorophyll-protein complex I subunit A4	1.1	0.00047	Up
1	1.1.1.1	PS.lightreaction.photosystem II.LHC-II	AT4G10340	light harvesting complex of photosystem II 5	1.5	2.1e-06	Up
1	1.1.1.1	PS.lightreaction.photosystem II.LHC-II	AT5G54270	light-harvesting chlorophyll B-binding protein 3	1.3	0.0015	Up
1	1.1.1.2	PS.lightreaction.photosystem II.PSII polypeptide subunits	AT1G05260	Peroxidase superfamily protein	3	0.00013	Up
1	1.1.1.2	PS.lightreaction.photosystem II.PSII polypeptide subunits	AT1G29910	chlorophyll A/B binding protein 3	2.1	0.002	Up
1	1.1.1.2	PS.lightreaction.photosystem II.PSII polypeptide subunits	AT1G29920	chlorophyll A/B-binding protein 2	1.7	0.003	Up
1	1.1.1.2	PS.lightreaction.photosystem II.PSII polypeptide subunits	AT1G29930	chlorophyll A/B binding protein 1	2.7	8.4e-07	Up
1	1.1.1.2	PS.lightreaction.photosystem II.PSII polypeptide subunits	AT1G35290	Thioesterase superfamily protein	1.1	6.2e-05	Up
1	1.1.1.2	PS.lightreaction.photosystem II.PSII polypeptide subunits	AT1G51400	Photosystem II 5 kD protein	1.5	1.9e-05	Up
1	1.1.1.2	PS.lightreaction.photosystem II.PSII polypeptide subunits	AT2G01918	PsbQ-like 3	2.3	0.001	Up
1	1.1.1.2	PS.lightreaction.photosystem II.PSII polypeptide subunits	AT2G05070	photosystem II light harvesting complex protein 2.2	2.9	5e-06	Up
1	1.1.1.2	PS.lightreaction.photosystem II.PSII polypeptide subunits	AT2G05100	photosystem II light harvesting complex protein 2.1	2	1.6e-06	Up
1	1.1.1.2	PS.lightreaction.photosystem II.PSII polypeptide subunits	AT2G34420	photosystem II light harvesting complex protein B1B2	1.3	0.00016	Up
1	1.1.1.2	PS.lightreaction.photosystem II.PSII polypeptide subunits	AT2G34430	light-harvesting chlorophyll-protein complex II subunit B1	3.7	0.00011	Up
1	1.1.1.2	PS.lightreaction.photosystem II.PSII polypeptide subunits	AT2G37260	WRKY family transcription factor family protein	-1.3	0.02	Down
1	1.1.1.2	PS.lightreaction.photosystem II.PSII polypeptide subunits	AT3G21055	photosystem II subunit T	1.7	4.9e-07	Up
1	1.1.1.2	PS.lightreaction.photosystem II.PSII polypeptide subunits	AT3G21770	Peroxidase superfamily protein	1.3	0.0002	Up
1	1.1.1.2	PS.lightreaction.photosystem II.PSII polypeptide subunits	AT3G27690	photosystem II light harvesting complex protein 2.3	3.8	9.6e-08	Up
1	1.1.1.2	PS.lightreaction.photosystem II.PSII polypeptide subunits	AT4G21280	photosystem II subunit QA	1.5	1.7e-05	Up
1	1.1.1.2	PS.lightreaction.photosystem II.PSII polypeptide subunits	AT4G30850	heptahelical transmembrane protein2	1.1	0.0012	Up
1	1.1.1.2	PS.lightreaction.photosystem II.PSII polypeptide subunits	AT4G31870	glutathione peroxidase 7	-1.1	2.8e-06	Down
1	1.1.1.2	PS.lightreaction.photosystem II.PSII polypeptide subunits	AT4G35270	Plant regulator RWP-RK family protein	-1.3	0.00084	Down
1	1.1.1.2	PS.lightreaction.photosystem II.PSII polypeptide subunits	AT5G20270	heptahelical transmembrane protein1	1.6	4.1e-07	Up
1	1.1.1.2	PS.lightreaction.photosystem II.PSII polypeptide subunits	AT5G22460	alpha/beta-Hydrolases superfamily protein	1.6	0.0023	Up
1	1.1.1.2	PS.lightreaction.photosystem II.PSII polypeptide subunits	AT5G44110	P-loop containing nucleoside triphosphate hydrolases superfamily protein	1.6	0.0033	Up
1	1.1.1.2	PS.lightreaction.photosystem II.PSII polypeptide subunits	ATCG00070	photosystem II reaction center protein K precursor	2	1.9e-05	Up
1	1.1.1.2	PS.lightreaction.photosystem II.PSII polypeptide subunits	ATCG00080	photosystem II reaction center protein I	1.1	0.024	Up
1	1.1.1.2	PS.lightreaction.photosystem II.PSII polypeptide subunits	ATCG00300	YCF9	1.4	0.012	Up
1	1.1.1.2	PS.lightreaction.photosystem II.PSII polypeptide subunits	ATCG00560	photosystem II reaction center protein L	1.5	0.0077	Up
1	1.1.1.2	PS.lightreaction.photosystem II.PSII polypeptide subunits	ATCG00570	photosystem II reaction center protein F	2	0.0072	Up
1	1.1.1.2	PS.lightreaction.photosystem II.PSII polypeptide subunits	ATCG00690	photosystem II reaction center protein T	1.4	0.00019	Up
1	1.1.2.1	PS.lightreaction.photosystem I.LHC-I	AT3G47470	light-harvesting chlorophyll-protein complex I subunit A4	1.1	0.00047	Up
1	1.1.2.2	PS.lightreaction.photosystem I.PSI polypeptide subunits	AT1G08380	photosystem I subunit O	1.2	0.00031	Up
1	1.1.2.2	PS.lightreaction.photosystem I.PSI polypeptide subunits	AT1G30380	photosystem I subunit K	1.6	1.8e-05	Up
1	1.1.2.2	PS.lightreaction.photosystem I.PSI polypeptide subunits	AT1G51400	Photosystem II 5 kD protein	1.5	1.9e-05	Up
1	1.1.2.2	PS.lightreaction.photosystem I.PSI polypeptide subunits	AT1G52220	CURVATURE THYLAKOID protein	1.3	0.00015	Up
1	1.1.2.2	PS.lightreaction.photosystem I.PSI polypeptide subunits	AT1G52230	photosystem I subunit H2	1.1	0.0017	Up
1	1.1.2.2	PS.lightreaction.photosystem I.PSI polypeptide subunits	AT1G55670	photosystem I subunit G	1.3	5.7e-05	Up
1	1.1.2.2	PS.lightreaction.photosystem I.PSI polypeptide subunits	AT2G03210	fucosyltransferase 2	3.1	0.049	Up
1	1.1.2.2	PS.lightreaction.photosystem I.PSI polypeptide subunits	AT2G15390	fucosyltransferase 4	-2.9	5.7e-09	Down
1	1.1.2.2	PS.lightreaction.photosystem I.PSI polypeptide subunits	AT3G21055	photosystem II subunit T	1.7	4.9e-07	Up
1	1.1.2.2	PS.lightreaction.photosystem I.PSI polypeptide subunits	AT3G22540	hypothetical protein (DUF1677)	5.2	2.7e-10	Up
1	1.1.2.2	PS.lightreaction.photosystem I.PSI polypeptide subunits	AT4G14819	hypothetical protein (DUF1677)	2.8	0.019	Up
1	1.1.2.2	PS.lightreaction.photosystem I.PSI polypeptide subunits	AT5G14760	L-aspartate oxidase	-1.7	2.3e-13	Down
1	1.1.2.2	PS.lightreaction.photosystem I.PSI polypeptide subunits	AT5G25110	CBL-interacting protein kinase 25	-1.5	0.00054	Down
1	1.1.2.2	PS.lightreaction.photosystem I.PSI polypeptide subunits	AT5G64040	photosystem I reaction center subunit PSI-N%2C chloroplast%2C putative / PSI-N%2C putative (PSAN)	1.4	0.00017	Up
1	1.1.3	PS.lightreaction.cytochrome b6/f	AT1G19490	Basic-leucine zipper (bZIP) transcription factor family protein	-1.6	0.00046	Down
1	1.1.3	PS.lightreaction.cytochrome b6/f	ATCG00600	PETG	2.1	0.0063	Up
1	1.1.3.4	PS.lightreaction.cytochrome b6/f.apocytochrome f (CYF)	ATCG00540	photosynthetic electron transfer A	1.1	0.00063	Up
1	1.1.4	PS.lightreaction.ATP synthase	AT4G25850	OSBP(oxysterol binding protein)-related protein 4B	1.3	0.0045	Up
1	1.1.4	PS.lightreaction.ATP synthase	AT4G25860	OSBP(oxysterol binding protein)-related protein 4A	2.8	1.7e-06	Up
1	1.1.4	PS.lightreaction.ATP synthase	AT5G05420	FKBP-like peptidyl-prolyl cis-trans isomerase family protein	-2.2	0.038	Down
1	1.1.4	PS.lightreaction.ATP synthase	AT5G13550	sulfate transporter 4.1	-1	0.00024	Down
1	1.1.4.1	PS.lightreaction.ATP synthase.alpha subunit	ATCG00120	ATP synthase subunit alpha	1.2	0.014	Up
1	1.1.4.2	PS.lightreaction.ATP synthase.beta subunit	ATCG00470	ATP synthase epsilon chain	1.3	0.0035	Up
1	1.1.4.2	PS.lightreaction.ATP synthase.beta subunit	ATCG00480	ATP synthase subunit beta	1.2	0.0003	Up
1	1.1.4.3	PS.lightreaction.ATP synthase.epsilon chain	ATCG00470	ATP synthase epsilon chain	1.3	0.0035	Up
1	1.1.4.3	PS.lightreaction.ATP synthase.epsilon chain	ATCG00480	ATP synthase subunit beta	1.2	0.0003	Up
1	1.1.4.8	PS.lightreaction.ATP synthase.subunit B (ATPF)	ATCG00130	ATPase%2C F0 complex%2C subunit B/B'%2C bacterial/chloroplast	1.5	0.0023	Up
1	1.1.5.1	PS.lightreaction.other electron carrier (ox/red).plastocyanin	AT5G25370	phospholipase D alpha 3	1.7	3.4e-05	Up
1	1.1.5.2	PS.lightreaction.other electron carrier (ox/red).ferredoxin	AT2G27510	ferredoxin 3	-2.6	3.1e-07	Down
1	1.1.5.3	PS.lightreaction.other electron carrier (ox/red).ferredoxin reductase	AT1G30510	root FNR 2	-2.2	4e-08	Down
1	1.1.5.3	PS.lightreaction.other electron carrier (ox/red).ferredoxin reductase	AT4G05390	root FNR 1	-2.4	4.8e-08	Down
1	1.1.5.4	PS.lightreaction.other electron carrier (ox/red).ferredoxin oxireductase	AT2G24970	spindle/kinetochore-associated protein	3.2	0.049	Up
1	1.1.6	PS.lightreaction.NADH DH	ATCG00430	photosystem II reaction center protein G	1.1	0.0042	Up
1	1.1.6	PS.lightreaction.NADH DH	ATCG00440	NADH:ubiquinone/plastoquinone oxidoreductase%2C chain 3 protein	1.2	0.031	Up
1	1.1.6	PS.lightreaction.NADH DH	ATCG01050	NADH-plastoquinone oxidoreductase subunit	1.6	9.2e-05	Up
1	1.1.30	PS.lightreaction.state transition	AT1G52140	Avr9/Cf-9 rapidly elicited protein	1.3	3.6e-05	Up
1	1.1.30	PS.lightreaction.state transition	AT3G16330	Avr9/Cf-9 rapidly elicited protein	1.1	0.0048	Up
1	1.1.40	PS.lightreaction.cyclic electron flow-chlororespiration	ATCG00430	photosystem II reaction center protein G	1.1	0.0042	Up
1	1.1.40	PS.lightreaction.cyclic electron flow-chlororespiration	ATCG00890	NADH-Ubiquinone/plastoquinone (complex I) protein	1.2	0.027	Up
1	1.1.40	PS.lightreaction.cyclic electron flow-chlororespiration	ATCG01070	NADH-ubiquinone/plastoquinone oxidoreductase chain 4L	1.8	0.019	Up
1	1.1.40	PS.lightreaction.cyclic electron flow-chlororespiration	ATCG01100	NADH dehydrogenase family protein	1.2	0.021	Up
1	1.1.40	PS.lightreaction.cyclic electron flow-chlororespiration	ATCG01110	NAD(P)H dehydrogenase subunit H	1.9	0.014	Up
1	1.2.2	PS.photorespiration.glycolate oxydase	AT1G12600	UDP-N-acetylglucosamine (UAA) transporter family	1.5	0.046	Up
1	1.2.2	PS.photorespiration.glycolate oxydase	AT3G48390	MA3 domain-containing protein	-1.2	0.012	Down
1	1.2.2	PS.photorespiration.glycolate oxydase	AT4G09010	ascorbate peroxidase 4	1.3	0.00042	Up
1	1.2.2	PS.photorespiration.glycolate oxydase	AT4G29310	DUF1005 family protein (DUF1005)	1.7	0.00031	Up
1	1.2.4.2	PS.photorespiration.glycine cleavage.T subunit	AT1G11860	Glycine cleavage T-protein family	1.1	0.0008	Up
1	1.2.5	PS.photorespiration.serine hydroxymethyltransferase	AT4G13930	serine hydroxymethyltransferase 4	1.8	1.1e-05	Up
1	1.2.6	PS.photorespiration.hydroxypyruvate reductase	AT4G22880	leucoanthocyanidin dioxygenase	-1.1	0.048	Down
1	1.3.1	PS.calvin cycle.rubisco large subunit	AT5G21940	hybrid signal transduction histidine kinase M-like protein	-1.2	8.2e-06	Down
1	1.3.1	PS.calvin cycle.rubisco large subunit	ATCG00490	ribulose-bisphosphate carboxylase	1.3	0.01	Up
1	1.3.2	PS.calvin cycle.rubisco small subunit	AT1G04500	CCT motif family protein	-2.3	0.022	Down
1	1.3.2	PS.calvin cycle.rubisco small subunit	AT5G38410	Ribulose bisphosphate carboxylase (small chain) family protein	1.3	0.0002	Up
1	1.3.2	PS.calvin cycle.rubisco small subunit	AT5G38420	Ribulose bisphosphate carboxylase (small chain) family protein	1.6	0.00077	Up
1	1.3.12	PS.calvin cycle.PRK	AT2G30550	alpha/beta-Hydrolases superfamily protein	1.1	1.4e-07	Up
2	2.1.2	major CHO metabolism.synthesis.starch	AT2G35710	Nucleotide-diphospho-sugar transferases superfamily protein	-2.2	0.0084	Down
2	2.1.2	major CHO metabolism.synthesis.starch	AT3G18660	plant glycogenin-like starch initiation protein 1	1.9	5.8e-05	Up
2	2.1.2	major CHO metabolism.synthesis.starch	AT4G33330	plant glycogenin-like starch initiation protein 3	1.9	5.8e-05	Up
2	2.1.2.2	major CHO metabolism.synthesis.starch.starch synthase	AT1G32900	UDP-Glycosyltransferase superfamily protein	-1.1	0.018	Down
2	2.1.2.5	major CHO metabolism.synthesis.starch.transporter	AT5G13490	ADP/ATP carrier 2	-1.4	0.00084	Down
2	2.2.1.1	major CHO metabolism.degradation.sucrose.fructokinase	AT1G66430	pfkB-like carbohydrate kinase family protein	1.8	0.018	Up
2	2.2.1.1	major CHO metabolism.degradation.sucrose.fructokinase	AT2G31390	pfkB-like carbohydrate kinase family protein	1.1	3.2e-06	Up
2	2.2.1.3.1	major CHO metabolism.degradation.sucrose.invertases.neutral	AT1G04820	tubulin alpha-4 chain	1.6	7.3e-06	Up
2	2.2.1.3.1	major CHO metabolism.degradation.sucrose.invertases.neutral	AT1G10657	transmembrane protein	2.3	2.3e-05	Up
2	2.2.1.3.1	major CHO metabolism.degradation.sucrose.invertases.neutral	AT1G22650	Plant neutral invertase family protein	-1.5	9.9e-05	Down
2	2.2.1.3.1	major CHO metabolism.degradation.sucrose.invertases.neutral	AT1G50010	tubulin alpha-2 chain	2.2	2.6e-07	Up
2	2.2.1.3.1	major CHO metabolism.degradation.sucrose.invertases.neutral	AT1G77590	long chain acyl-CoA synthetase 9	1.5	0.00033	Up
2	2.2.1.3.1	major CHO metabolism.degradation.sucrose.invertases.neutral	AT2G28620	P-loop containing nucleoside triphosphate hydrolases superfamily protein	1.6	0.019	Up
2	2.2.1.3.1	major CHO metabolism.degradation.sucrose.invertases.neutral	AT2G28950	expansin A6	2.8	5.9e-06	Up
2	2.2.1.3.1	major CHO metabolism.degradation.sucrose.invertases.neutral	AT2G29680	cell division control 6	7.9	0.01	Up
2	2.2.1.3.1	major CHO metabolism.degradation.sucrose.invertases.neutral	AT2G30020	Protein phosphatase 2C family protein	-2.6	2e-06	Down
2	2.2.1.3.1	major CHO metabolism.degradation.sucrose.invertases.neutral	AT2G30990	arginine N-methyltransferase%2C putative (DUF688)	1.1	0.011	Up
2	2.2.1.3.1	major CHO metabolism.degradation.sucrose.invertases.neutral	AT2G36200	P-loop containing nucleoside triphosphate hydrolases superfamily protein	2	0.00096	Up
2	2.2.1.3.1	major CHO metabolism.degradation.sucrose.invertases.neutral	AT2G37640	Barwin-like endoglucanases superfamily protein	4.5	1.1e-06	Up
2	2.2.1.3.1	major CHO metabolism.degradation.sucrose.invertases.neutral	AT2G39700	expansin A4	2.3	1e-08	Up
2	2.2.1.3.1	major CHO metabolism.degradation.sucrose.invertases.neutral	AT3G11490	rac GTPase activating protein	1	0.00029	Up
2	2.2.1.3.1	major CHO metabolism.degradation.sucrose.invertases.neutral	AT3G23090	TPX2 (targeting protein for Xklp2) protein family	1.4	0.0015	Up
2	2.2.1.3.1	major CHO metabolism.degradation.sucrose.invertases.neutral	AT3G26060	Thioredoxin superfamily protein	1.3	7.7e-05	Up
2	2.2.1.3.1	major CHO metabolism.degradation.sucrose.invertases.neutral	AT3G45850	P-loop containing nucleoside triphosphate hydrolases superfamily protein	1.1	5.3e-05	Up
2	2.2.1.3.1	major CHO metabolism.degradation.sucrose.invertases.neutral	AT3G47950	H[+]-ATPase 4	-1.5	0.005	Down
2	2.2.1.3.1	major CHO metabolism.degradation.sucrose.invertases.neutral	AT3G55500	expansin A16	8.2	7.1e-06	Up
2	2.2.1.3.1	major CHO metabolism.degradation.sucrose.invertases.neutral	AT4G02800	GRIP/coiled-coil protein	2.1	0.0053	Up
2	2.2.1.3.1	major CHO metabolism.degradation.sucrose.invertases.neutral	AT4G09510	cytosolic invertase 2	1.1	9.4e-05	Up
2	2.2.1.3.1	major CHO metabolism.degradation.sucrose.invertases.neutral	AT4G14960	Tubulin/FtsZ family protein	1.4	2.5e-05	Up
2	2.2.1.3.1	major CHO metabolism.degradation.sucrose.invertases.neutral	AT4G34860	Plant neutral invertase family protein	-2.3	1.4e-10	Down
2	2.2.1.3.1	major CHO metabolism.degradation.sucrose.invertases.neutral	AT5G14760	L-aspartate oxidase	-1.7	2.3e-13	Down
2	2.2.1.3.1	major CHO metabolism.degradation.sucrose.invertases.neutral	AT5G60720	electron transporter%2C putative (Protein of unknown function%2C DUF547)	1.4	0.00085	Up
2	2.2.1.3.1	major CHO metabolism.degradation.sucrose.invertases.neutral	AT5G62670	H[+]-ATPase 11	1.2	2.3e-05	Up
2	2.2.1.3.2	major CHO metabolism.degradation.sucrose.invertases.cell wall	AT5G11920	6-%261-fructan exohydrolase	-2.9	0.00086	Down
2	2.2.1.4	major CHO metabolism.degradation.sucrose.hexokinase	AT1G11160	Transducin/WD40 repeat-like superfamily protein	1.4	0.034	Up
2	2.2.1.4	major CHO metabolism.degradation.sucrose.hexokinase	AT5G25930	kinase family with leucine-rich repeat domain-containing protein	-1.6	0.0013	Down
2	2.2.1.5	major CHO metabolism.degradation.sucrose.Susy	AT1G73370	sucrose synthase 6	2.1	2.3e-07	Up
2	2.2.1.5	major CHO metabolism.degradation.sucrose.Susy	AT5G37180	sucrose synthase 5	1.8	2.1e-07	Up
2	2.2.1.99	major CHO metabolism.degradation.sucrose.misc	AT5G14510	ARM repeat superfamily protein	1.3	0.0029	Up
2	2.2.2.1	major CHO metabolism.degradation.starch.starch cleavage	AT2G46420	helicase with zinc finger protein	-1.2	3.9e-07	Down
2	2.2.2.6	major CHO metabolism.degradation.starch.transporter	AT1G17710	Pyridoxal phosphate phosphatase-related protein	-1.8	0.03	Down
2	2.2.2.6	major CHO metabolism.degradation.starch.transporter	AT1G33260	Protein kinase superfamily protein	2	1.5e-12	Up
2	2.2.2.6	major CHO metabolism.degradation.starch.transporter	AT1G69400	Transducin/WD40 repeat-like superfamily protein	1.4	0.012	Up
2	2.2.2.6	major CHO metabolism.degradation.starch.transporter	AT1G77700	Pathogenesis-related thaumatin superfamily protein	1.1	0.011	Up
2	2.2.2.6	major CHO metabolism.degradation.starch.transporter	AT2G30150	UDP-Glycosyltransferase superfamily protein	2.2	5e-06	Up
2	2.2.2.6	major CHO metabolism.degradation.starch.transporter	AT3G01015	TPX2 (targeting protein for Xklp2) protein family	-2.9	0.0013	Down
2	2.2.2.6	major CHO metabolism.degradation.starch.transporter	AT3G14630	cytochrome P450%2C family 72%2C subfamily A%2C polypeptide 9	-3.3	0.00046	Down
3	3.1.1.1	minor CHO metabolism.raffinose family.galactinol synthases.known	AT1G56600	galactinol synthase 2	-1	0.03	Down
3	3.1.2.1	minor CHO metabolism.raffinose family.raffinose synthases.known	AT3G57520	seed imbibition 2	-1.3	4.3e-16	Down
3	3.1.2.1	minor CHO metabolism.raffinose family.raffinose synthases.known	AT5G40390	Raffinose synthase family protein	1.4	0.00075	Up
3	3.1.3	minor CHO metabolism.raffinose family.stachyose synthases	AT3G57520	seed imbibition 2	-1.3	4.3e-16	Down
3	3.2.2	minor CHO metabolism.trehalose.TPP	AT1G35910	Haloacid dehalogenase-like hydrolase (HAD) superfamily protein	2	3.6e-09	Up
3	3.2.2	minor CHO metabolism.trehalose.TPP	AT1G78090	trehalose-6-phosphate phosphatase	2.5	5.1e-06	Up
3	3.2.2	minor CHO metabolism.trehalose.TPP	AT2G22190	Haloacid dehalogenase-like hydrolase (HAD) superfamily protein	-1	0.036	Down
3	3.2.2	minor CHO metabolism.trehalose.TPP	AT5G51460	Haloacid dehalogenase-like hydrolase (HAD) superfamily protein	1.4	5.8e-05	Up
3	3.4.1	minor CHO metabolism.myo-inositol.poly-phosphatases	AT1G77870	membrane-anchored ubiquitin-fold protein 5 precursor	2	0.03	Up
3	3.4.1	minor CHO metabolism.myo-inositol.poly-phosphatases	AT3G61760	DYNAMIN-like 1B	1.7	6e-07	Up
3	3.4.1	minor CHO metabolism.myo-inositol.poly-phosphatases	AT4G18010	myo-inositol polyphosphate 5-phosphatase 2	-1.1	0.0063	Down
3	3.4.1	minor CHO metabolism.myo-inositol.poly-phosphatases	AT5G14180	Myzus persicae-induced lipase 1	2.6	0.0025	Up
3	3.4.1	minor CHO metabolism.myo-inositol.poly-phosphatases	AT5G15780	Pollen Ole e 1 allergen and extensin family protein	5.5	0.00059	Up
3	3.5	minor CHO metabolism.others	AT1G66430	pfkB-like carbohydrate kinase family protein	1.8	0.018	Up
3	3.5	minor CHO metabolism.others	AT2G22850	basic leucine-zipper 6	2.2	2.2e-08	Up
3	3.5	minor CHO metabolism.others	AT3G01260	Galactose mutarotase-like superfamily protein	-1.8	0.014	Down
3	3.5	minor CHO metabolism.others	AT3G18070	beta glucosidase 43	1.9	0.036	Up
3	3.5	minor CHO metabolism.others	AT3G18080	B-S glucosidase 44	1.1	0.0006	Up
3	3.5	minor CHO metabolism.others	AT3G23760	transferring glycosyl group transferase	1.1	0.016	Up
3	3.5	minor CHO metabolism.others	AT3G54690	Sugar isomerase (SIS) family protein	1.1	9.3e-05	Up
3	3.5	minor CHO metabolism.others	AT4G17030	expansin-like B1	-1	0.0039	Down
3	3.5	minor CHO metabolism.others	AT4G25900	Galactose mutarotase-like superfamily protein	-1	6.1e-05	Down
3	3.5	minor CHO metabolism.others	AT4G37730	basic leucine-zipper 7	3.6	3.8e-05	Up
3	3.5	minor CHO metabolism.others	AT5G11920	6-%261-fructan exohydrolase	-2.9	0.00086	Down
3	3.6	minor CHO metabolism.callose	AT3G14570	glucan synthase-like 4	1.8	4.8e-11	Up
3	3.6	minor CHO metabolism.callose	AT3G14780	callose synthase	3.2	4.1e-09	Up
3	3.6	minor CHO metabolism.callose	AT5G08000	glucan endo-1%2C3-beta-glucosidase-like protein 3	3.1	0.00057	Up
3	3.8	minor CHO metabolism.galactose	AT5G26622	Beta-galactosidase related protein	-1.2	3.3e-06	Down
3	3.8.2	minor CHO metabolism.galactose.alpha-galactosidases	AT5G08370	alpha-galactosidase 2	1.2	0.00026	Up
4	4.1.2	glycolysis.cytosolic branch.phosphoglucomutase (PGM)	AT1G23190	Phosphoglucomutase/phosphomannomutase family protein	1	4.2e-05	Up
4	4.1.4	glycolysis.cytosolic branch.phosphofructokinase (PFK)	AT4G32840	phosphofructokinase 6	1.1	0.017	Up
4	4.1.5	glycolysis.cytosolic branch.pyrophosphate-fructose-6-P phosphotransferase	AT1G76550	Phosphofructokinase family protein	1	2.3e-05	Up
4	4.1.14	glycolysis.cytosolic branch.pyruvate kinase (PK)	AT2G36580	Pyruvate kinase family protein	-2.7	3.1e-20	Down
4	4.1.16	glycolysis.cytosolic branch.phosphoenolpyruvate carboxykinase (PEPCK)	AT3G04530	phosphoenolpyruvate carboxylase kinase 2	-2.6	0.00061	Down
4	4.2.2	glycolysis.plastid branch.phosphoglucomutase (PGM)	AT1G23190	Phosphoglucomutase/phosphomannomutase family protein	1	4.2e-05	Up
4	4.2.4	glycolysis.plastid branch.phosphofructokinase (PFK)	AT4G32840	phosphofructokinase 6	1.1	0.017	Up
4	4.2.5	glycolysis.plastid branch.pyrophosphate-fructose-6-P phosphotransferase	AT1G12000	Phosphofructokinase family protein	1.4	6.3e-07	Up
4	4.2.12	glycolysis.plastid branch.phosphoglycerate mutase	AT1G22170	Phosphoglycerate mutase family protein	1.5	3.3e-06	Up
4	4.2.12	glycolysis.plastid branch.phosphoglycerate mutase	AT1G78050	phosphoglycerate/bisphosphoglycerate mutase	-2.3	2.1e-06	Down
4	4.2.14	glycolysis.plastid branch.pyruvate kinase (PK)	AT3G49780	phytosulfokine 4 precursor	-1.4	0.00029	Down
4	4.3.15	glycolysis.unclear/dually targeted.phospho-enol-pyruvate carboxylase (PEPC)	AT1G10120	basic helix-loop-helix (bHLH) DNA-binding superfamily protein	1	0.0001	Up
4	4.3.15	glycolysis.unclear/dually targeted.phospho-enol-pyruvate carboxylase (PEPC)	AT3G04530	phosphoenolpyruvate carboxylase kinase 2	-2.6	0.00061	Down
4	4.3.15	glycolysis.unclear/dually targeted.phospho-enol-pyruvate carboxylase (PEPC)	AT5G50915	basic helix-loop-helix (bHLH) DNA-binding superfamily protein	4.3	0.00055	Up
4	4.3.15	glycolysis.unclear/dually targeted.phospho-enol-pyruvate carboxylase (PEPC)	AT5G64810	WRKY DNA-binding protein 51	-3.1	0.0039	Down
5	5.2	fermentation.PDC	AT5G01320	Thiamine pyrophosphate dependent pyruvate decarboxylase family protein	-1.7	0.0011	Down
5	5.2	fermentation.PDC	AT5G02140	Pathogenesis-related thaumatin superfamily protein	2.1	0.02	Up
5	5.3	fermentation.ADH	AT5G24760	GroES-like zinc-binding dehydrogenase family protein	1.7	7.2e-06	Up
5	5.1	fermentation.aldehyde dehydrogenase	AT4G36250	aldehyde dehydrogenase 3F1	1.1	0.00094	Up
6	6.3	gluconeogenesis / glyoxylate cycle.malate dehydrogenase	AT3G47520	malate dehydrogenase	-1.5	3.2e-11	Down
6	6.4	gluconeogenesis / glyoxylate cycle.phosphoenolpyruvate carboxykinase (PEPCK)	AT5G65690	phosphoenolpyruvate carboxykinase 2	-2.5	0.01	Down
7	7.1.1	OPP.oxidative PP.glucose-6-phosphate 1-dehydrogenase (G6PD)	AT1G09420	glucose-6-phosphate dehydrogenase 4	-1.4	0.0017	Down
7	7.1.1	OPP.oxidative PP.glucose-6-phosphate 1-dehydrogenase (G6PD)	AT1G24280	glucose-6-phosphate dehydrogenase 3	-2.8	1.7e-08	Down
7	7.1.1	OPP.oxidative PP.glucose-6-phosphate 1-dehydrogenase (G6PD)	AT5G13110	glucose-6-phosphate dehydrogenase 2	-2.1	9.4e-10	Down
7	7.1.2	OPP.oxidative PP.6-phosphogluconolactonase	AT5G24420	6-phosphogluconolactonase 5	1.2	0.00012	Up
7	7.1.3	OPP.oxidative PP.6-phosphogluconate dehydrogenase	AT4G22880	leucoanthocyanidin dioxygenase	-1.1	0.048	Down
7	7.1.3	OPP.oxidative PP.6-phosphogluconate dehydrogenase	AT5G41670	6-phosphogluconate dehydrogenase family protein	-2.1	4.2e-05	Down
7	7.3	OPP.electron transfer	AT1G30510	root FNR 2	-2.2	4e-08	Down
7	7.3	OPP.electron transfer	AT2G27510	ferredoxin 3	-2.6	3.1e-07	Down
7	7.3	OPP.electron transfer	AT4G05390	root FNR 1	-2.4	4.8e-08	Down
8	8.1.1.1	TCA / organic transformation.TCA.pyruvate DH.E1	AT5G24290	Vacuolar iron transporter (VIT) family protein	1.6	0.03	Up
8	8.1.1.3	TCA / organic transformation.TCA.pyruvate DH.E3	AT4G16155	dihydrolipoamide dehydrogenase	1.2	1e-05	Up
8	8.1.3	TCA / organic transformation.TCA.aconitase	AT4G26970	aconitase 2	-1	1.9e-09	Down
8	8.1.4	TCA / organic transformation.TCA.IDH	AT1G19940	glycosyl hydrolase 9B5	2	0.00024	Up
8	8.1.4	TCA / organic transformation.TCA.IDH	AT1G75680	glycosyl hydrolase 9B7	1.7	1.2e-05	Up
8	8.1.7	TCA / organic transformation.TCA.succinate dehydrogenase	AT5G14760	L-aspartate oxidase	-1.7	2.3e-13	Down
8	8.1.9	TCA / organic transformation.TCA.malate DH	AT3G47520	malate dehydrogenase	-1.5	3.2e-11	Down
8	8.2.9	TCA / organic transformation.other organic acid transformations.cyt MDH	AT3G47520	malate dehydrogenase	-1.5	3.2e-11	Down
8	8.2.9	TCA / organic transformation.other organic acid transformations.cyt MDH	AT5G56720	Lactate/malate dehydrogenase family protein	1.8	5.4e-07	Up
8	8.2.10	TCA / organic transformation.other organic acid transformations.malic	AT2G19900	NADP-malic enzyme 1	-3.3	0.00024	Down
8	8.2.10	TCA / organic transformation.other organic acid transformations.malic	AT5G25880	NADP-malic enzyme 3	5.7	2.6e-05	Up
8	8.2.11	TCA / organic transformation.other organic acid transformations.atp-citrate lyase	AT1G07000	exocyst subunit exo70 family protein B2	-1.4	0.00011	Down
8	8.2.11	TCA / organic transformation.other organic acid transformations.atp-citrate lyase	AT1G10670	ATP-citrate lyase A-1	1.5	1.1e-07	Up
8	8.2.11	TCA / organic transformation.other organic acid transformations.atp-citrate lyase	AT1G60810	ATP-citrate lyase A-2	2.2	6.8e-08	Up
8	8.2.11	TCA / organic transformation.other organic acid transformations.atp-citrate lyase	AT5G49460	ATP citrate lyase subunit B 2	1.9	3.6e-06	Up
8	8.2.11	TCA / organic transformation.other organic acid transformations.atp-citrate lyase	AT5G58430	exocyst subunit exo70 family protein B1	-1.2	7.4e-09	Down
8	8.3	TCA / organic transformation.carbonic anhydrases	AT3G01500	carbonic anhydrase 1	2.6	0.00036	Up
8	8.3	TCA / organic transformation.carbonic anhydrases	AT5G14740	carbonic anhydrase 2	1.4	0.00062	Up
9	9.1.1	mitochondrial electron transport / ATP synthesis.NADH-DH (type I).complex I	ATCG01110	NAD(P)H dehydrogenase subunit H	1.9	0.014	Up
9	9.1.2	mitochondrial electron transport / ATP synthesis.NADH-DH (type I).localisation not clear	AT2G27250	CLAVATA3	-6.8	0.033	Down
9	9.1.2	mitochondrial electron transport / ATP synthesis.NADH-DH (type I).localisation not clear	AT2G43120	RmlC-like cupins superfamily protein	-1.2	4.8e-05	Down
9	9.1.2	mitochondrial electron transport / ATP synthesis.NADH-DH (type I).localisation not clear	AT5G54570	beta glucosidase 41	1.5	0.016	Up
9	9.1.2	mitochondrial electron transport / ATP synthesis.NADH-DH (type I).localisation not clear	ATCG00430	photosystem II reaction center protein G	1.1	0.0042	Up
9	9.1.2	mitochondrial electron transport / ATP synthesis.NADH-DH (type I).localisation not clear	ATMG01320	NADH dehydrogenase 2B	-1.3	7e-06	Down
9	9.2.1	mitochondrial electron transport / ATP synthesis.NADH-DH (type II).internal matrix	AT4G21490	NAD(P)H dehydrogenase B3	-2.9	0.0077	Down
9	9.2.2	mitochondrial electron transport / ATP synthesis.NADH-DH (type II).external	AT4G21490	NAD(P)H dehydrogenase B3	-2.9	0.0077	Down
9	9.3	mitochondrial electron transport / ATP synthesis.electron transfer flavoprotein	AT1G32170	xyloglucan endotransglucosylase/hydrolase 30	2.1	0.0013	Up
9	9.3	mitochondrial electron transport / ATP synthesis.electron transfer flavoprotein	AT1G35180	TRAM%2C LAG1 and CLN8 (TLC) lipid-sensing domain containing protein	3.9	0.0031	Up
9	9.3	mitochondrial electron transport / ATP synthesis.electron transfer flavoprotein	AT1G45010	TRAM%2C LAG1 and CLN8 (TLC) lipid-sensing domain containing protein	2.3	8.4e-09	Up
9	9.3	mitochondrial electron transport / ATP synthesis.electron transfer flavoprotein	AT1G76520	Auxin efflux carrier family protein	-1.2	6e-07	Down
9	9.3	mitochondrial electron transport / ATP synthesis.electron transfer flavoprotein	AT2G33385	actin-related protein C2B	1.7	3.7e-05	Up
9	9.3	mitochondrial electron transport / ATP synthesis.electron transfer flavoprotein	AT4G35270	Plant regulator RWP-RK family protein	-1.3	0.00084	Down
9	9.4	mitochondrial electron transport / ATP synthesis.alternative oxidase	AT1G32350	alternative oxidase 1D	-2.7	0.018	Down
9	9.4	mitochondrial electron transport / ATP synthesis.alternative oxidase	AT3G27620	alternative oxidase 1C	-1.2	0.041	Down
9	9.7	mitochondrial electron transport / ATP synthesis.cytochrome c oxidase	AT3G01680	sieve element occlusion amino-terminus protein	1.1	2.6e-05	Up
9	9.8	mitochondrial electron transport / ATP synthesis.uncoupling protein	AT2G22500	uncoupling protein 5	-2	5.5e-10	Down
9	9.8	mitochondrial electron transport / ATP synthesis.uncoupling protein	AT4G24570	dicarboxylate carrier 2	-3	2.8e-16	Down
9	9.9	mitochondrial electron transport / ATP synthesis.F1-ATPase	AT3G49210	O-acyltransferase (WSD1-like) family protein	-1.1	6.9e-05	Down
9	9.9	mitochondrial electron transport / ATP synthesis.F1-ATPase	AT5G16350	O-acyltransferase (WSD1-like) family protein	2.1	0.0008	Up
9	9.9	mitochondrial electron transport / ATP synthesis.F1-ATPase	AT5G22490	O-acyltransferase (WSD1-like) family protein	1	0.029	Up
9	9.9	mitochondrial electron transport / ATP synthesis.F1-ATPase	ATCG00470	ATP synthase epsilon chain	1.3	0.0035	Up
9	9.9	mitochondrial electron transport / ATP synthesis.F1-ATPase	ATCG00480	ATP synthase subunit beta	1.2	0.0003	Up
10	10	cell wall	AT5G41900	alpha/beta-Hydrolases superfamily protein	4.1	1.1e-07	Up
10	10.1	cell wall.precursor synthesis	AT1G31070	N-acetylglucosamine-1-phosphate uridylyltransferase 1	1.4	2.8e-05	Up
10	10.1	cell wall.precursor synthesis	AT2G35020	N-acetylglucosamine-1-phosphate uridylyltransferase 2	1.2	3.2e-05	Up
10	10.1	cell wall.precursor synthesis	AT5G50420	O-fucosyltransferase family protein	1.2	3.6e-05	Up
10	10.1.4	cell wall.precursor synthesis.UGD	AT1G26570	UDP-glucose dehydrogenase 1	1	0.0011	Up
10	10.1.4	cell wall.precursor synthesis.UGD	AT3G29360	UDP-glucose 6-dehydrogenase family protein	1.1	0.00016	Up
10	10.1.4	cell wall.precursor synthesis.UGD	AT5G15490	UDP-glucose 6-dehydrogenase family protein	1.6	4.7e-05	Up
10	10.1.4	cell wall.precursor synthesis.UGD	AT5G39320	UDP-glucose 6-dehydrogenase family protein	2.8	5.9e-08	Up
10	10.1.5	cell wall.precursor synthesis.UXS	AT1G11160	Transducin/WD40 repeat-like superfamily protein	1.4	0.034	Up
10	10.1.5	cell wall.precursor synthesis.UXS	AT1G17030	hypothetical protein	2.3	4.8e-05	Up
10	10.1.5	cell wall.precursor synthesis.UXS	AT1G26100	Cytochrome b561/ferric reductase transmembrane protein family	1.1	0.0013	Up
10	10.1.5	cell wall.precursor synthesis.UXS	AT1G52827	cadmium tolerance 1	1.2	0.006	Up
10	10.1.5	cell wall.precursor synthesis.UXS	AT1G55810	uridine kinase-like 3	1.8	2.8e-07	Up
10	10.1.5	cell wall.precursor synthesis.UXS	AT1G62800	aspartate aminotransferase 4	1.3	2.1e-09	Up
10	10.1.5	cell wall.precursor synthesis.UXS	AT2G22930	UDP-Glycosyltransferase superfamily protein	1	0.029	Up
10	10.1.5	cell wall.precursor synthesis.UXS	AT2G28760	UDP-XYL synthase 6	2.3	7.5e-08	Up
10	10.1.5	cell wall.precursor synthesis.UXS	AT2G40550	E2F target protein 1 (ETG1)	3	6.5e-05	Up
10	10.1.5	cell wall.precursor synthesis.UXS	AT2G47010	calcium/calcium/calmodulin-dependent Serine/Threonine-kinase	2.3	1.8e-05	Up
10	10.1.5	cell wall.precursor synthesis.UXS	AT3G03773	HSP20-like chaperones superfamily protein	1.1	9.2e-12	Up
10	10.1.5	cell wall.precursor synthesis.UXS	AT3G29630	UDP-Glycosyltransferase superfamily protein	2.1	3e-06	Up
10	10.1.5	cell wall.precursor synthesis.UXS	AT3G54560	histone H2A 11	1.8	0.004	Up
10	10.1.5	cell wall.precursor synthesis.UXS	AT4G09500	UDP-Glycosyltransferase superfamily protein	1.2	1.3e-05	Up
10	10.1.5	cell wall.precursor synthesis.UXS	AT5G04250	Cysteine proteinases superfamily protein	-1.1	0.00016	Down
10	10.1.5	cell wall.precursor synthesis.UXS	AT5G44350	ethylene-responsive nuclear protein-like protein	-1.3	0.0073	Down
10	10.1.5	cell wall.precursor synthesis.UXS	AT5G52340	exocyst subunit exo70 family protein A2	2.9	6.8e-06	Up
10	10.1.5	cell wall.precursor synthesis.UXS	AT5G54060	UDP-glucose:flavonoid 3-o-glucosyltransferase	-1.3	0.024	Down
10	10.1.5	cell wall.precursor synthesis.UXS	AT5G59290	UDP-glucuronic acid decarboxylase 3	2.5	3.8e-09	Up
10	10.1.12.1	cell wall.precursor synthesis.KDO pathway.arabinose-5-phosphate isomerase	AT3G54690	Sugar isomerase (SIS) family protein	1.1	9.3e-05	Up
10	10.1.20	cell wall.precursor synthesis.phosphomannose isomerase	AT1G67070	Mannose-6-phosphate isomerase%2C type I	1	0.0045	Up
10	10.1.30.1	cell wall.precursor synthesis.sugar kinases.galacturonic acid kinase	AT3G10700	galacturonic acid kinase	1.5	4.1e-06	Up
10	10.2	cell wall.cellulose synthesis	AT4G07960	Cellulose-synthase-like C12	2.6	0.0016	Up
10	10.2	cell wall.cellulose synthesis	AT4G24260	glycosyl hydrolase 9A3	1.8	6.5e-05	Up
10	10.2	cell wall.cellulose synthesis	AT4G31590	Cellulose-synthase-like C5	1.8	2.3e-07	Up
10	10.2	cell wall.cellulose synthesis	AT5G49720	glycosyl hydrolase 9A1	1	0.0005	Up
10	10.2.1	cell wall.cellulose synthesis.cellulose synthase	AT1G02730	cellulose synthase-like D5	1.7	0.001	Up
10	10.2.1	cell wall.cellulose synthesis.cellulose synthase	AT1G23480	cellulose synthase-like A3	3	0.0026	Up
10	10.2.1	cell wall.cellulose synthesis.cellulose synthase	AT1G24070	cellulose synthase-like A10	1.9	2.4e-13	Up
10	10.2.1	cell wall.cellulose synthesis.cellulose synthase	AT2G21770	cellulose synthase A9	1.2	0.0012	Up
10	10.2.1	cell wall.cellulose synthesis.cellulose synthase	AT4G18780	cellulose synthase family protein	1.6	0.00052	Up
10	10.2.1	cell wall.cellulose synthesis.cellulose synthase	AT4G23990	cellulose synthase like G3	-1.3	0.024	Down
10	10.2.1	cell wall.cellulose synthesis.cellulose synthase	AT4G39350	cellulose synthase A2	1.5	1.1e-07	Up
10	10.2.1	cell wall.cellulose synthesis.cellulose synthase	AT5G03760	Nucleotide-diphospho-sugar transferases superfamily protein	1.7	0.00028	Up
10	10.2.1	cell wall.cellulose synthesis.cellulose synthase	AT5G22740	cellulose synthase-like A02	2.2	7.1e-08	Up
10	10.2.1	cell wall.cellulose synthesis.cellulose synthase	AT5G44030	cellulose synthase A4	1.3	0.0053	Up
10	10.2.2	cell wall.cellulose synthesis.COBRA	AT3G16860	COBRA-like protein 8 precursor	-1.8	0.0031	Down
10	10.2.2	cell wall.cellulose synthesis.COBRA	AT5G15630	COBRA-like extracellular glycosyl-phosphatidyl inositol-anchored protein family	1.7	0.00026	Up
10	10.3	cell wall.hemicellulose synthesis	AT1G05170	Galactosyltransferase family protein	1.1	0.00052	Up
10	10.3	cell wall.hemicellulose synthesis	AT1G26810	galactosyltransferase1	1.7	5e-06	Up
10	10.3	cell wall.hemicellulose synthesis	AT1G27120	Galactosyltransferase family protein	2.7	3.8e-05	Up
10	10.3	cell wall.hemicellulose synthesis	AT1G71990	fucosyltransferase 13	1	0.041	Up
10	10.3	cell wall.hemicellulose synthesis	AT2G03210	fucosyltransferase 2	3.1	0.049	Up
10	10.3	cell wall.hemicellulose synthesis	AT2G15390	fucosyltransferase 4	-2.9	5.7e-09	Down
10	10.3	cell wall.hemicellulose synthesis	AT3G07130	purple acid phosphatase 15	1	0.04	Up
10	10.3	cell wall.hemicellulose synthesis	AT3G52820	purple acid phosphatase 22	3.5	8e-05	Up
10	10.3	cell wall.hemicellulose synthesis	AT3G62720	xylosyltransferase 1	-1.1	0.006	Down
10	10.3	cell wall.hemicellulose synthesis	AT5G07720	Galactosyl transferase GMA12/MNN10 family protein	2.7	0.02	Up
10	10.3	cell wall.hemicellulose synthesis	AT5G25310	Exostosin family protein	4.7	0.0036	Up
10	10.3	cell wall.hemicellulose synthesis	AT5G25820	Exostosin family protein	-1.3	0.0014	Down
10	10.3	cell wall.hemicellulose synthesis	AT5G37000	glycosyltransferase family exostosin protein	2.4	6.4e-07	Up
10	10.3.1.1	cell wall.hemicellulose synthesis.xyloglucan.XXXG galactose transferase	AT1G68470	Exostosin family protein	2	0.026	Up
10	10.3.2	cell wall.hemicellulose synthesis.glucuronoxylan	AT1G19300	Nucleotide-diphospho-sugar transferases superfamily protein	1.1	0.002	Up
10	10.3.2	cell wall.hemicellulose synthesis.glucuronoxylan	AT2G37090	Nucleotide-diphospho-sugar transferases superfamily protein	2.3	2.3e-07	Up
10	10.3.2	cell wall.hemicellulose synthesis.glucuronoxylan	AT3G18660	plant glycogenin-like starch initiation protein 1	1.9	5.8e-05	Up
10	10.3.2	cell wall.hemicellulose synthesis.glucuronoxylan	AT3G50760	galacturonosyltransferase-like 2	1.2	0.017	Up
10	10.3.2	cell wall.hemicellulose synthesis.glucuronoxylan	AT4G33330	plant glycogenin-like starch initiation protein 3	1.9	5.8e-05	Up
10	10.3.2	cell wall.hemicellulose synthesis.glucuronoxylan	AT4G36890	Nucleotide-diphospho-sugar transferases superfamily protein	1.4	9.9e-07	Up
10	10.3.2	cell wall.hemicellulose synthesis.glucuronoxylan	AT5G22940	glucuronoxylan glucuronosyltransferase%2C putative	2.2	0.0018	Up
10	10.3.2	cell wall.hemicellulose synthesis.glucuronoxylan	AT5G54690	galacturonosyltransferase 12	1.6	0.00021	Up
10	10.3.2	cell wall.hemicellulose synthesis.glucuronoxylan	AT5G67230	Nucleotide-diphospho-sugar transferases superfamily protein	1.3	0.0033	Up
10	10.4.3.6	cell wall.pectin synthesis.rhamnogalacturonan II.xylose transferase with fucose acceptor	AT4G01750	rhamnogalacturonan xylosyltransferase 2	-1.3	0.0068	Down
10	10.4.4.1	cell wall.pectin synthesis.xylogalacturonan.xylose transferase	AT5G25310	Exostosin family protein	4.7	0.0036	Up
10	10.4.4.1	cell wall.pectin synthesis.xylogalacturonan.xylose transferase	AT5G25820	Exostosin family protein	-1.3	0.0014	Down
10	10.4.4.1	cell wall.pectin synthesis.xylogalacturonan.xylose transferase	AT5G37000	glycosyltransferase family exostosin protein	2.4	6.4e-07	Up
10	10.5.1	cell wall.cell wall proteins.AGPs	AT1G20120	GDSL-like Lipase/Acylhydrolase superfamily protein	-1.3	0.0044	Down
10	10.5.1	cell wall.cell wall proteins.AGPs	AT1G55330	arabinogalactan protein 21	1.3	0.003	Up
10	10.5.1	cell wall.cell wall proteins.AGPs	AT1G68725	arabinogalactan protein 19	2.4	1.9e-06	Up
10	10.5.1	cell wall.cell wall proteins.AGPs	AT2G14890	arabinogalactan protein 9	1.9	5.7e-06	Up
10	10.5.1	cell wall.cell wall proteins.AGPs	AT2G23130	arabinogalactan protein 17	2.4	0.0034	Up
10	10.5.1	cell wall.cell wall proteins.AGPs	AT2G47930	arabinogalactan protein 26	3.1	0.00018	Up
10	10.5.1	cell wall.cell wall proteins.AGPs	AT3G13520	arabinogalactan protein 12	1.5	0.003	Up
10	10.5.1	cell wall.cell wall proteins.AGPs	AT3G61640	arabinogalactan protein 20	-1	0.0058	Down
10	10.5.1	cell wall.cell wall proteins.AGPs	AT4G16980	arabinogalactan-protein family	2.5	0.033	Up
10	10.5.1	cell wall.cell wall proteins.AGPs	AT4G26320	arabinogalactan protein 13	3.4	2.9e-06	Up
10	10.5.1	cell wall.cell wall proteins.AGPs	AT4G37450	arabinogalactan protein 18	3	3.2e-08	Up
10	10.5.1	cell wall.cell wall proteins.AGPs	AT5G10430	arabinogalactan protein 4	1.2	0.0053	Up
10	10.5.1	cell wall.cell wall proteins.AGPs	AT5G18690	arabinogalactan protein 25	1.3	0.00027	Up
10	10.5.1	cell wall.cell wall proteins.AGPs	AT5G53250	arabinogalactan protein 22	2.8	0.00016	Up
10	10.5.1	cell wall.cell wall proteins.AGPs	AT5G56540	arabinogalactan protein 14	2.5	3.4e-05	Up
10	10.5.1	cell wall.cell wall proteins.AGPs	AT5G60490	FASCICLIN-like arabinogalactan-protein 12	1.9	2.4e-05	Up
10	10.5.1	cell wall.cell wall proteins.AGPs	AT5G65390	arabinogalactan protein 7	3.1	0.00054	Up
10	10.5.1.1	cell wall.cell wall proteins.AGPs.AGP	AT2G04780	FASCICLIN-like arabinoogalactan 7	2.8	1.8e-11	Up
10	10.5.1.1	cell wall.cell wall proteins.AGPs.AGP	AT2G35860	FASCICLIN-like arabinogalactan protein 16 precursor	1.2	0.005	Up
10	10.5.1.1	cell wall.cell wall proteins.AGPs.AGP	AT2G45470	FASCICLIN-like arabinogalactan protein 8	1.8	0.00019	Up
10	10.5.1.1	cell wall.cell wall proteins.AGPs.AGP	AT3G11700	FASCICLIN-like arabinogalactan protein 18 precursor	1.1	0.00095	Up
10	10.5.1.1	cell wall.cell wall proteins.AGPs.AGP	AT3G52370	FASCICLIN-like arabinogalactan protein 15 precursor	2.6	2.2e-06	Up
10	10.5.1.1	cell wall.cell wall proteins.AGPs.AGP	AT4G12730	FASCICLIN-like arabinogalactan 2	3.3	4.3e-05	Up
10	10.5.1.1	cell wall.cell wall proteins.AGPs.AGP	AT5G03170	FASCICLIN-like arabinogalactan-protein 11	1.1	0.025	Up
10	10.5.1.1	cell wall.cell wall proteins.AGPs.AGP	AT5G06390	FASCICLIN-like arabinogalactan protein 17 precursor	1.2	0.0029	Up
10	10.5.1.1	cell wall.cell wall proteins.AGPs.AGP	AT5G44130	FASCICLIN-like arabinogalactan protein 13 precursor	2.4	3.2e-07	Up
10	10.5.1.1	cell wall.cell wall proteins.AGPs.AGP	AT5G55730	FASCICLIN-like arabinogalactan 1	2.5	0.00024	Up
10	10.5.2	cell wall.cell wall proteins.proline rich proteins	AT1G28290	arabinogalactan protein 31	1.5	0.0018	Up
10	10.5.3	cell wall.cell wall proteins.LRR	AT1G49750	Leucine-rich repeat (LRR) family protein	1.8	0.00054	Up
10	10.5.3	cell wall.cell wall proteins.LRR	AT1G70990	proline-rich family protein	1.3	0.035	Up
10	10.5.3	cell wall.cell wall proteins.LRR	AT2G19780	Leucine-rich repeat (LRR) family protein	2.2	1.2e-06	Up
10	10.5.3	cell wall.cell wall proteins.LRR	AT2G36050	ovate family protein 15	5	0.028	Up
10	10.5.3	cell wall.cell wall proteins.LRR	AT2G42800	receptor like protein 29	1.2	0.011	Up
10	10.5.3	cell wall.cell wall proteins.LRR	AT2G46630	serine/arginine repetitive matrix protein	1.6	2.3e-06	Up
10	10.5.3	cell wall.cell wall proteins.LRR	AT3G19020	Leucine-rich repeat (LRR) family protein	-2.5	0.00061	Down
10	10.5.3	cell wall.cell wall proteins.LRR	AT3G24480	Leucine-rich repeat (LRR) family protein	1.5	0.00016	Up
10	10.5.3	cell wall.cell wall proteins.LRR	AT4G18670	Leucine-rich repeat (LRR) family protein	3.8	0.00012	Up
10	10.5.3	cell wall.cell wall proteins.LRR	AT4G28380	Leucine-rich repeat (LRR) family protein	1.3	0.017	Up
10	10.5.3	cell wall.cell wall proteins.LRR	AT4G29240	Leucine-rich repeat (LRR) family protein	1.6	0.045	Up
10	10.5.4	cell wall.cell wall proteins.HRGP	AT5G12880	proline-rich family protein	-1.3	0.018	Down
10	10.6	cell wall.degradation	AT4G25433	peptidoglycan-binding LysM domain-containing protein	7.4	0.02	Up
10	10.6.1	cell wall.degradation.cellulases and beta-1,4-glucanases	AT1G02640	beta-xylosidase 2	2.9	0.00026	Up
10	10.6.1	cell wall.degradation.cellulases and beta-1,4-glucanases	AT1G13130	Cellulase (glycosyl hydrolase family 5) protein	4.3	4.3e-08	Up
10	10.6.1	cell wall.degradation.cellulases and beta-1,4-glucanases	AT1G19940	glycosyl hydrolase 9B5	2	0.00024	Up
10	10.6.1	cell wall.degradation.cellulases and beta-1,4-glucanases	AT1G27200	glycosyltransferase family protein (DUF23)	-1	1.9e-07	Down
10	10.6.1	cell wall.degradation.cellulases and beta-1,4-glucanases	AT1G45191	Glycosyl hydrolase superfamily protein	1.2	0.02	Up
10	10.6.1	cell wall.degradation.cellulases and beta-1,4-glucanases	AT1G64390	glycosyl hydrolase 9C2	3.2	3.5e-09	Up
10	10.6.1	cell wall.degradation.cellulases and beta-1,4-glucanases	AT1G70710	glycosyl hydrolase 9B1	3.4	1.5e-06	Up
10	10.6.1	cell wall.degradation.cellulases and beta-1,4-glucanases	AT1G71380	cellulase 3	2.2	0.00011	Up
10	10.6.1	cell wall.degradation.cellulases and beta-1,4-glucanases	AT1G75680	glycosyl hydrolase 9B7	1.7	1.2e-05	Up
10	10.6.1	cell wall.degradation.cellulases and beta-1,4-glucanases	AT1G78060	Glycosyl hydrolase family protein	1.4	0.00017	Up
10	10.6.1	cell wall.degradation.cellulases and beta-1,4-glucanases	AT2G20680	Glycosyl hydrolase superfamily protein	1.5	0.00012	Up
10	10.6.1	cell wall.degradation.cellulases and beta-1,4-glucanases	AT2G32990	glycosyl hydrolase 9B8	3.8	1.6e-07	Up
10	10.6.1	cell wall.degradation.cellulases and beta-1,4-glucanases	AT3G27330	zinc finger (C3HC4-type RING finger) family protein	-1.4	2.7e-05	Down
10	10.6.1	cell wall.degradation.cellulases and beta-1,4-glucanases	AT3G57770	Protein kinase superfamily protein	-1.2	7.7e-05	Down
10	10.6.1	cell wall.degradation.cellulases and beta-1,4-glucanases	AT4G02290	glycosyl hydrolase 9B13	5	0.00026	Up
10	10.6.1	cell wall.degradation.cellulases and beta-1,4-glucanases	AT4G11050	glycosyl hydrolase 9C3	4	0.02	Up
10	10.6.1	cell wall.degradation.cellulases and beta-1,4-glucanases	AT4G24260	glycosyl hydrolase 9A3	1.8	6.5e-05	Up
10	10.6.1	cell wall.degradation.cellulases and beta-1,4-glucanases	AT4G28320	Glycosyl hydrolase superfamily protein	1.1	0.00086	Up
10	10.6.1	cell wall.degradation.cellulases and beta-1,4-glucanases	AT4G39010	glycosyl hydrolase 9B18	-2	0.00048	Down
10	10.6.1	cell wall.degradation.cellulases and beta-1,4-glucanases	AT5G49720	glycosyl hydrolase 9A1	1	0.0005	Up
10	10.6.2	cell wall.degradation.mannan-xylose-arabinose-fucose	AT1G02640	beta-xylosidase 2	2.9	0.00026	Up
10	10.6.2	cell wall.degradation.mannan-xylose-arabinose-fucose	AT1G15170	MATE efflux family protein	-1.1	0.0017	Down
10	10.6.2	cell wall.degradation.mannan-xylose-arabinose-fucose	AT1G45130	beta-galactosidase 5	3.2	0.00032	Up
10	10.6.2	cell wall.degradation.mannan-xylose-arabinose-fucose	AT1G58370	glycosyl hydrolase family 10 protein / carbohydrate-binding domain-containing protein	1.8	1.7e-06	Up
10	10.6.2	cell wall.degradation.mannan-xylose-arabinose-fucose	AT1G66760	MATE efflux family protein	-4	2.8e-08	Down
10	10.6.2	cell wall.degradation.mannan-xylose-arabinose-fucose	AT1G67830	alpha-fucosidase 1	1.1	0.0065	Up
10	10.6.2	cell wall.degradation.mannan-xylose-arabinose-fucose	AT1G71140	MATE efflux family protein	-1.2	0.023	Down
10	10.6.2	cell wall.degradation.mannan-xylose-arabinose-fucose	AT1G78060	Glycosyl hydrolase family protein	1.4	0.00017	Up
10	10.6.2	cell wall.degradation.mannan-xylose-arabinose-fucose	AT2G20680	Glycosyl hydrolase superfamily protein	1.5	0.00012	Up
10	10.6.2	cell wall.degradation.mannan-xylose-arabinose-fucose	AT2G28100	alpha-L-fucosidase 1	1.2	0.0024	Up
10	10.6.2	cell wall.degradation.mannan-xylose-arabinose-fucose	AT2G28470	beta-galactosidase 8	2.6	1.3e-07	Up
10	10.6.2	cell wall.degradation.mannan-xylose-arabinose-fucose	AT3G10740	alpha-L-arabinofuranosidase 1	1.6	5.6e-07	Up
10	10.6.2	cell wall.degradation.mannan-xylose-arabinose-fucose	AT3G13750	beta galactosidase 1	1.3	5.4e-05	Up
10	10.6.2	cell wall.degradation.mannan-xylose-arabinose-fucose	AT3G52840	beta-galactosidase 2	2.1	1.7e-08	Up
10	10.6.2	cell wall.degradation.mannan-xylose-arabinose-fucose	AT4G08160	glycosyl hydrolase family 10 protein / carbohydrate-binding domain-containing protein	1.6	1.2e-06	Up
10	10.6.2	cell wall.degradation.mannan-xylose-arabinose-fucose	AT4G17490	ethylene responsive element binding factor 6	-3.5	2.5e-13	Down
10	10.6.2	cell wall.degradation.mannan-xylose-arabinose-fucose	AT4G26140	beta-galactosidase 12	3.8	1.8e-06	Up
10	10.6.2	cell wall.degradation.mannan-xylose-arabinose-fucose	AT4G28320	Glycosyl hydrolase superfamily protein	1.1	0.00086	Up
10	10.6.2	cell wall.degradation.mannan-xylose-arabinose-fucose	AT4G33810	Glycosyl hydrolase superfamily protein	3	5e-13	Up
10	10.6.2	cell wall.degradation.mannan-xylose-arabinose-fucose	AT4G36360	beta-galactosidase 3	2.8	2.2e-08	Up
10	10.6.2	cell wall.degradation.mannan-xylose-arabinose-fucose	AT5G01930	Glycosyl hydrolase superfamily protein	1.6	2.1e-08	Up
10	10.6.2	cell wall.degradation.mannan-xylose-arabinose-fucose	AT5G14450	GDSL-like Lipase/Acylhydrolase superfamily protein	2.4	0.031	Up
10	10.6.2	cell wall.degradation.mannan-xylose-arabinose-fucose	AT5G20710	beta-galactosidase 7	1.9	4.2e-05	Up
10	10.6.2	cell wall.degradation.mannan-xylose-arabinose-fucose	AT5G26120	alpha-L-arabinofuranosidase 2	7.9	0.019	Up
10	10.6.2	cell wall.degradation.mannan-xylose-arabinose-fucose	AT5G47230	ethylene responsive element binding factor 5	-2.3	2.2e-06	Down
10	10.6.2	cell wall.degradation.mannan-xylose-arabinose-fucose	AT5G51190	Integrase-type DNA-binding superfamily protein	-2.6	2.8e-15	Down
10	10.6.2	cell wall.degradation.mannan-xylose-arabinose-fucose	AT5G57560	Xyloglucan endotransglucosylase/hydrolase family protein	-2.3	2.5e-05	Down
10	10.6.2	cell wall.degradation.mannan-xylose-arabinose-fucose	AT5G61600	ethylene response factor 104	-2.9	7.5e-10	Down
10	10.6.2	cell wall.degradation.mannan-xylose-arabinose-fucose	AT5G66460	Glycosyl hydrolase superfamily protein	1	0.0047	Up
10	10.6.3	cell wall.degradation.pectate lyases and polygalacturonases	AT1G01560	MAP kinase 11	-1.9	0.00021	Down
10	10.6.3	cell wall.degradation.pectate lyases and polygalacturonases	AT1G02460	Pectin lyase-like superfamily protein	2	0.00045	Up
10	10.6.3	cell wall.degradation.pectate lyases and polygalacturonases	AT1G04680	Pectin lyase-like superfamily protein	4.2	4.2e-08	Up
10	10.6.3	cell wall.degradation.pectate lyases and polygalacturonases	AT1G09890	Rhamnogalacturonate lyase family protein	2.3	0.0013	Up
10	10.6.3	cell wall.degradation.pectate lyases and polygalacturonases	AT1G10640	Pectin lyase-like superfamily protein	10	0.0087	Up
10	10.6.3	cell wall.degradation.pectate lyases and polygalacturonases	AT1G11915	wall-associated receptor kinase galacturonan-binding protein	1.5	0.0042	Up
10	10.6.3	cell wall.degradation.pectate lyases and polygalacturonases	AT1G19170	Pectin lyase-like superfamily protein	1.3	0.00067	Up
10	10.6.3	cell wall.degradation.pectate lyases and polygalacturonases	AT1G23460	Pectin lyase-like superfamily protein	2.1	1.5e-07	Up
10	10.6.3	cell wall.degradation.pectate lyases and polygalacturonases	AT1G23760	BURP domain-containing protein	1.4	0.028	Up
10	10.6.3	cell wall.degradation.pectate lyases and polygalacturonases	AT1G48100	Pectin lyase-like superfamily protein	2.3	0.00042	Up
10	10.6.3	cell wall.degradation.pectate lyases and polygalacturonases	AT1G49320	unknown seed protein like 1	-1.1	0.00077	Down
10	10.6.3	cell wall.degradation.pectate lyases and polygalacturonases	AT1G60390	polygalacturonase 1	1.5	0.00085	Up
10	10.6.3	cell wall.degradation.pectate lyases and polygalacturonases	AT1G60590	Pectin lyase-like superfamily protein	7.2	3.2e-08	Up
10	10.6.3	cell wall.degradation.pectate lyases and polygalacturonases	AT1G67750	Pectate lyase family protein	1.7	0.00013	Up
10	10.6.3	cell wall.degradation.pectate lyases and polygalacturonases	AT1G70370	polygalacturonase 2	1.9	6.2e-05	Up
10	10.6.3	cell wall.degradation.pectate lyases and polygalacturonases	AT1G70500	Pectin lyase-like superfamily protein	1.6	5.9e-13	Up
10	10.6.3	cell wall.degradation.pectate lyases and polygalacturonases	AT2G41850	polygalacturonase ADPG2-like protein	7.7	0.04	Up
10	10.6.3	cell wall.degradation.pectate lyases and polygalacturonases	AT3G06770	Pectin lyase-like superfamily protein	2.6	9e-05	Up
10	10.6.3	cell wall.degradation.pectate lyases and polygalacturonases	AT3G14040	Pectin lyase-like superfamily protein	-3.5	0.0041	Down
10	10.6.3	cell wall.degradation.pectate lyases and polygalacturonases	AT3G15720	Pectin lyase-like superfamily protein	2.7	0.002	Up
10	10.6.3	cell wall.degradation.pectate lyases and polygalacturonases	AT3G42950	Pectin lyase-like superfamily protein	1	0.0024	Up
10	10.6.3	cell wall.degradation.pectate lyases and polygalacturonases	AT3G53190	Pectin lyase-like superfamily protein	2.8	1.7e-06	Up
10	10.6.3	cell wall.degradation.pectate lyases and polygalacturonases	AT3G54920	Pectin lyase-like superfamily protein	1.7	9e-05	Up
10	10.6.3	cell wall.degradation.pectate lyases and polygalacturonases	AT4G13710	Pectin lyase-like superfamily protein	1.5	0.013	Up
10	10.6.3	cell wall.degradation.pectate lyases and polygalacturonases	AT4G23500	Pectin lyase-like superfamily protein	1.9	1.3e-07	Up
10	10.6.3	cell wall.degradation.pectate lyases and polygalacturonases	AT4G23820	Pectin lyase-like superfamily protein	3.8	0.00038	Up
10	10.6.3	cell wall.degradation.pectate lyases and polygalacturonases	AT4G24430	Rhamnogalacturonate lyase family protein	2.6	0.0008	Up
10	10.6.3	cell wall.degradation.pectate lyases and polygalacturonases	AT4G24780	Pectin lyase-like superfamily protein	2.9	1.3e-07	Up
10	10.6.3	cell wall.degradation.pectate lyases and polygalacturonases	AT5G04310	Pectin lyase-like superfamily protein	1.2	0.014	Up
10	10.6.3	cell wall.degradation.pectate lyases and polygalacturonases	AT5G63180	Pectin lyase-like superfamily protein	7.2	0.00017	Up
10	10.7	cell wall.modification	AT1G10550	xyloglucan:xyloglucosyl transferase 33	5.2	0.0045	Up
10	10.7	cell wall.modification	AT1G20190	expansin 11	5.2	0.001	Up
10	10.7	cell wall.modification	AT1G26770	expansin A10	1.5	2.1e-07	Up
10	10.7	cell wall.modification	AT1G32170	xyloglucan endotransglucosylase/hydrolase 30	2.1	0.0013	Up
10	10.7	cell wall.modification	AT1G69530	expansin A1	2.7	1.5e-05	Up
10	10.7	cell wall.modification	AT2G03090	expansin A15	3.1	2.8e-09	Up
10	10.7	cell wall.modification	AT2G06850	xyloglucan endotransglucosylase/hydrolase 4	4.1	0.00031	Up
10	10.7	cell wall.modification	AT2G14620	xyloglucan endotransglucosylase/hydrolase 10	2.5	0.0011	Up
10	10.7	cell wall.modification	AT2G28950	expansin A6	2.8	5.9e-06	Up
10	10.7	cell wall.modification	AT2G36870	xyloglucan endotransglucosylase/hydrolase 32	3	1.2e-07	Up
10	10.7	cell wall.modification	AT2G37640	Barwin-like endoglucanases superfamily protein	4.5	1.1e-06	Up
10	10.7	cell wall.modification	AT2G39700	expansin A4	2.3	1e-08	Up
10	10.7	cell wall.modification	AT3G03220	expansin A13	1.1	5.8e-05	Up
10	10.7	cell wall.modification	AT3G23730	xyloglucan endotransglucosylase/hydrolase 16	2.2	0.0059	Up
10	10.7	cell wall.modification	AT3G29030	expansin A5	3.4	0.00037	Up
10	10.7	cell wall.modification	AT3G44990	xyloglucan endo-transglycosylase-related 8	4	1.2e-09	Up
10	10.7	cell wall.modification	AT3G45960	expansin-like A3	-1.9	0.00071	Down
10	10.7	cell wall.modification	AT3G55500	expansin A16	8.2	7.1e-06	Up
10	10.7	cell wall.modification	AT4G03210	xyloglucan endotransglucosylase/hydrolase 9	2.6	3.2e-06	Up
10	10.7	cell wall.modification	AT4G14130	xyloglucan endotransglucosylase/hydrolase 15	7.3	0.00021	Up
10	10.7	cell wall.modification	AT4G17030	expansin-like B1	-1	0.0039	Down
10	10.7	cell wall.modification	AT4G28250	expansin B3	2.8	6.1e-07	Up
10	10.7	cell wall.modification	AT4G37800	xyloglucan endotransglucosylase/hydrolase 7	5.1	7.4e-05	Up
10	10.7	cell wall.modification	AT4G38400	expansin-like A2	1.7	0.044	Up
10	10.7	cell wall.modification	AT5G04160	Nucleotide-sugar transporter family protein	1.2	5.4e-05	Up
10	10.7	cell wall.modification	AT5G57530	xyloglucan endotransglucosylase/hydrolase 12	-2.4	0.0012	Down
10	10.7	cell wall.modification	AT5G57560	Xyloglucan endotransglucosylase/hydrolase family protein	-2.3	2.5e-05	Down
10	10.7	cell wall.modification	AT5G65730	xyloglucan endotransglucosylase/hydrolase 6	4.1	3.5e-06	Up
10	10.8.1	cell wall.pectinesterases.PME	AT1G02810	Plant invertase/pectin methylesterase inhibitor superfamily	5.4	0.0022	Up
10	10.8.1	cell wall.pectinesterases.PME	AT1G05310	Pectin lyase-like superfamily protein	3.4	2.7e-05	Up
10	10.8.1	cell wall.pectinesterases.PME	AT1G27940	P-glycoprotein 13	2.5	2.7e-07	Up
10	10.8.1	cell wall.pectinesterases.PME	AT1G41830	SKU5-similar 6	2.1	0.00011	Up
10	10.8.1	cell wall.pectinesterases.PME	AT1G76160	SKU5 similar 5	2	0.00021	Up
10	10.8.1	cell wall.pectinesterases.PME	AT2G36910	ATP binding cassette subfamily B1	1.3	9.7e-07	Up
10	10.8.1	cell wall.pectinesterases.PME	AT2G43050	Plant invertase/pectin methylesterase inhibitor superfamily	3.3	9.9e-12	Up
10	10.8.1	cell wall.pectinesterases.PME	AT2G45220	Plant invertase/pectin methylesterase inhibitor superfamily	3.3	9.2e-12	Up
10	10.8.1	cell wall.pectinesterases.PME	AT3G10720	Plant invertase/pectin methylesterase inhibitor superfamily	3.6	0.01	Up
10	10.8.1	cell wall.pectinesterases.PME	AT3G11570	TRICHOME BIREFRINGENCE-LIKE 8	-1.5	0.00024	Down
10	10.8.1	cell wall.pectinesterases.PME	AT3G18670	Ankyrin repeat family protein	1.8	0.016	Up
10	10.8.1	cell wall.pectinesterases.PME	AT3G28360	P-glycoprotein 16	-2.7	0.0014	Down
10	10.8.1	cell wall.pectinesterases.PME	AT3G28860	ATP binding cassette subfamily B19	1.4	0.007	Up
10	10.8.1	cell wall.pectinesterases.PME	AT3G49220	Plant invertase/pectin methylesterase inhibitor superfamily	1.9	0.00061	Up
10	10.8.1	cell wall.pectinesterases.PME	AT3G62150	P-glycoprotein 21	-1.3	0.0013	Down
10	10.8.1	cell wall.pectinesterases.PME	AT4G02320	Plant invertase/pectin methylesterase inhibitor superfamily	3.2	0.047	Up
10	10.8.1	cell wall.pectinesterases.PME	AT4G22010	SKU5 similar 4	3.7	0.022	Up
10	10.8.1	cell wall.pectinesterases.PME	AT4G33220	pectin methylesterase 44	1.7	0.00094	Up
10	10.8.1	cell wall.pectinesterases.PME	AT5G03510	C2H2-type zinc finger family protein	1.2	0.016	Up
10	10.8.1	cell wall.pectinesterases.PME	AT5G04970	Plant invertase/pectin methylesterase inhibitor superfamily	4.1	0.0031	Up
10	10.8.1	cell wall.pectinesterases.PME	AT5G07410	Pectin lyase-like superfamily protein	-3.1	0.0069	Down
10	10.8.1	cell wall.pectinesterases.PME	AT5G15900	TRICHOME BIREFRINGENCE-LIKE 19	2.3	0.00029	Up
10	10.8.1	cell wall.pectinesterases.PME	AT5G19730	Pectin lyase-like superfamily protein	2.3	0.0011	Up
10	10.8.1	cell wall.pectinesterases.PME	AT5G53370	pectin methylesterase PCR fragment F	1	1.3e-05	Up
10	10.8.1	cell wall.pectinesterases.PME	AT5G66920	SKU5 similar 17	1.7	0.0015	Up
10	10.8.2	cell wall.pectinesterases.acetyl esterase	AT3G05910	Pectinacetylesterase family protein	1.3	0.00099	Up
10	10.8.2	cell wall.pectinesterases.acetyl esterase	AT5G26670	Pectinacetylesterase family protein	3.3	8.2e-07	Up
10	10.8.2	cell wall.pectinesterases.acetyl esterase	AT5G45280	Pectinacetylesterase family protein	1.7	0.00074	Up
10	10.8.99	cell wall.pectinesterases.misc	AT3G49330	Plant invertase/pectin methylesterase inhibitor superfamily protein	2.6	0.0058	Up
10	10.8.99	cell wall.pectinesterases.misc	AT4G12420	Cupredoxin superfamily protein	2.9	0.0015	Up
11	11.1.1	lipid metabolism.FA synthesis and FA elongation.acetyl CoA carboxylation	AT3G56130	biotin/lipoyl attachment domain-containing protein	2	2.3e-07	Up
11	11.1.1.2.3	lipid metabolism.FA synthesis and FA elongation.acetyl CoA carboxylation.heteromeric complex.biotin carboxyl carrier protein	AT5G15530	biotin carboxyl carrier protein 2	1.9	0.01	Up
11	11.1.4	lipid metabolism.FA synthesis and FA elongation.ACP oxoacyl reductase	AT3G02500	mental retardation GTPase activating protein	2.4	0.00027	Up
11	11.1.8	lipid metabolism.FA synthesis and FA elongation.acyl CoA ligase	AT1G20010	tubulin beta-5 chain	1.9	5.4e-06	Up
11	11.1.8	lipid metabolism.FA synthesis and FA elongation.acyl CoA ligase	AT1G20510	OPC-8:0 CoA ligase1	-1.4	0.018	Down
11	11.1.8	lipid metabolism.FA synthesis and FA elongation.acyl CoA ligase	AT1G49430	long-chain acyl-CoA synthetase 2	1.7	0.0005	Up
11	11.1.8	lipid metabolism.FA synthesis and FA elongation.acyl CoA ligase	AT1G64400	AMP-dependent synthetase and ligase family protein	1.5	0.00016	Up
11	11.1.8	lipid metabolism.FA synthesis and FA elongation.acyl CoA ligase	AT1G65880	benzoyloxyglucosinolate 1	7.6	0.044	Up
11	11.1.8	lipid metabolism.FA synthesis and FA elongation.acyl CoA ligase	AT1G65890	acyl activating enzyme 12	2.3	0.025	Up
11	11.1.8	lipid metabolism.FA synthesis and FA elongation.acyl CoA ligase	AT1G75780	tubulin beta-1 chain	2.6	0.029	Up
11	11.1.8	lipid metabolism.FA synthesis and FA elongation.acyl CoA ligase	AT2G29550	tubulin beta-7 chain	1.1	0.0025	Up
11	11.1.8	lipid metabolism.FA synthesis and FA elongation.acyl CoA ligase	AT3G03190	glutathione S-transferase F11	1.9	2.3e-05	Up
11	11.1.8	lipid metabolism.FA synthesis and FA elongation.acyl CoA ligase	AT3G09820	adenosine kinase 1	1.4	1.8e-06	Up
11	11.1.8	lipid metabolism.FA synthesis and FA elongation.acyl CoA ligase	AT3G23790	AMP-dependent synthetase and ligase family protein	-1.1	0.00048	Down
11	11.1.8	lipid metabolism.FA synthesis and FA elongation.acyl CoA ligase	AT5G03300	adenosine kinase 2	1.4	1e-07	Up
11	11.1.8	lipid metabolism.FA synthesis and FA elongation.acyl CoA ligase	AT5G12250	beta-6 tubulin	1.6	2.1e-06	Up
11	11.1.8	lipid metabolism.FA synthesis and FA elongation.acyl CoA ligase	AT5G16340	AMP-dependent synthetase and ligase family protein	1.1	0.033	Up
11	11.1.8	lipid metabolism.FA synthesis and FA elongation.acyl CoA ligase	AT5G17220	glutathione S-transferase phi 12	-1.3	0.006	Down
11	11.1.8	lipid metabolism.FA synthesis and FA elongation.acyl CoA ligase	AT5G23860	tubulin beta 8	1.6	0.00015	Up
11	11.1.8	lipid metabolism.FA synthesis and FA elongation.acyl CoA ligase	AT5G44340	tubulin beta chain 4	1.5	1.9e-05	Up
11	11.1.9	lipid metabolism.FA synthesis and FA elongation.long chain fatty acid CoA ligase	AT1G23030	ARM repeat superfamily protein	1.5	5.6e-05	Up
11	11.1.9	lipid metabolism.FA synthesis and FA elongation.long chain fatty acid CoA ligase	AT1G49430	long-chain acyl-CoA synthetase 2	1.7	0.0005	Up
11	11.1.9	lipid metabolism.FA synthesis and FA elongation.long chain fatty acid CoA ligase	AT1G59940	response regulator 3	8.5	0.013	Up
11	11.1.9	lipid metabolism.FA synthesis and FA elongation.long chain fatty acid CoA ligase	AT1G64400	AMP-dependent synthetase and ligase family protein	1.5	0.00016	Up
11	11.1.9	lipid metabolism.FA synthesis and FA elongation.long chain fatty acid CoA ligase	AT1G65010	WEB family protein (DUF827)	1.7	9.4e-06	Up
11	11.1.9	lipid metabolism.FA synthesis and FA elongation.long chain fatty acid CoA ligase	AT1G77590	long chain acyl-CoA synthetase 9	1.5	0.00033	Up
11	11.1.9	lipid metabolism.FA synthesis and FA elongation.long chain fatty acid CoA ligase	AT3G02930	weak chloroplast movement under blue light protein (DUF827)	1.3	0.00015	Up
11	11.1.9	lipid metabolism.FA synthesis and FA elongation.long chain fatty acid CoA ligase	AT4G12420	Cupredoxin superfamily protein	2.9	0.0015	Up
11	11.1.9	lipid metabolism.FA synthesis and FA elongation.long chain fatty acid CoA ligase	AT4G27595	WEB family protein (DUF827)	2	2e-05	Up
11	11.1.10	lipid metabolism.FA synthesis and FA elongation.beta ketoacyl CoA synthase	AT1G01120	3-ketoacyl-CoA synthase 1	1.3	1.6e-08	Up
11	11.1.10	lipid metabolism.FA synthesis and FA elongation.beta ketoacyl CoA synthase	AT1G04220	3-ketoacyl-CoA synthase 2	2.2	3.8e-09	Up
11	11.1.10	lipid metabolism.FA synthesis and FA elongation.beta ketoacyl CoA synthase	AT3G50900	hypothetical protein	-1.3	2.5e-06	Down
11	11.1.10	lipid metabolism.FA synthesis and FA elongation.beta ketoacyl CoA synthase	AT3G54560	histone H2A 11	1.8	0.004	Up
11	11.1.10	lipid metabolism.FA synthesis and FA elongation.beta ketoacyl CoA synthase	AT4G36500	hypothetical protein	-2	2.7e-12	Down
11	11.1.11	lipid metabolism.FA synthesis and FA elongation.fatty acid elongase	AT1G01120	3-ketoacyl-CoA synthase 1	1.3	1.6e-08	Up
11	11.1.11	lipid metabolism.FA synthesis and FA elongation.fatty acid elongase	AT1G04220	3-ketoacyl-CoA synthase 2	2.2	3.8e-09	Up
11	11.1.11	lipid metabolism.FA synthesis and FA elongation.fatty acid elongase	AT3G23840	HXXXD-type acyl-transferase family protein	1.1	0.022	Up
11	11.1.11	lipid metabolism.FA synthesis and FA elongation.fatty acid elongase	AT4G24510	HXXXD-type acyl-transferase family protein	1.6	6.5e-05	Up
11	11.1.12	lipid metabolism.FA synthesis and FA elongation.ACP protein	AT5G47635	Pollen Ole e 1 allergen and extensin family protein	1.5	0.0043	Up
11	11.1.13	lipid metabolism.FA synthesis and FA elongation.acyl-CoA binding protein	AT1G03780	targeting protein for XKLP2	1.8	0.019	Up
11	11.1.13	lipid metabolism.FA synthesis and FA elongation.acyl-CoA binding protein	AT2G37970	SOUL heme-binding family protein	-1.3	5.1e-05	Down
11	11.1.13	lipid metabolism.FA synthesis and FA elongation.acyl-CoA binding protein	AT4G33905	Peroxisomal membrane 22 kDa (Mpv17/PMP22) family protein	-1.4	0.0094	Down
11	11.1.13	lipid metabolism.FA synthesis and FA elongation.acyl-CoA binding protein	AT5G53470	acyl-CoA binding protein 1	-1	4.2e-11	Down
11	11.1.15	lipid metabolism.FA synthesis and FA elongation.ACP desaturase	AT3G02640	transmembrane protein	1.8	0.0007	Up
11	11.1.15	lipid metabolism.FA synthesis and FA elongation.ACP desaturase	AT5G16230	Plant stearoyl-acyl-carrier-protein desaturase family protein	1.8	0.00015	Up
11	11.1.15	lipid metabolism.FA synthesis and FA elongation.ACP desaturase	AT5G16250	transmembrane protein	1.9	0.00085	Up
11	11.1.30	lipid metabolism.FA synthesis and FA elongation.pyruvate kinase	AT1G53040	tRNA (met) cytidine acetyltransferase%2C putative (DUF616)	1.2	0.0033	Up
11	11.1.30	lipid metabolism.FA synthesis and FA elongation.pyruvate kinase	AT2G36580	Pyruvate kinase family protein	-2.7	3.1e-20	Down
11	11.1.30	lipid metabolism.FA synthesis and FA elongation.pyruvate kinase	AT2G41210	phosphatidylinositol- 4-phosphate 5-kinase 5	-1	0.024	Down
11	11.1.30	lipid metabolism.FA synthesis and FA elongation.pyruvate kinase	AT3G09920	phosphatidyl inositol monophosphate 5 kinase	1	6.8e-10	Up
11	11.1.30	lipid metabolism.FA synthesis and FA elongation.pyruvate kinase	AT3G49780	phytosulfokine 4 precursor	-1.4	0.00029	Down
11	11.1.30	lipid metabolism.FA synthesis and FA elongation.pyruvate kinase	AT4G23790	TRICHOME BIREFRINGENCE-LIKE 24	1.6	8.4e-06	Up
11	11.1.31	lipid metabolism.FA synthesis and FA elongation.pyruvate DH	AT4G16155	dihydrolipoamide dehydrogenase	1.2	1e-05	Up
11	11.2.1	lipid metabolism.FA desaturation.desaturase	AT1G06090	Fatty acid desaturase family protein	2.7	1.5e-06	Up
11	11.2.3	lipid metabolism.FA desaturation.omega 3 desaturase	AT2G29980	fatty acid desaturase 3	2	7.2e-07	Up
11	11.2.3	lipid metabolism.FA desaturation.omega 3 desaturase	AT5G05580	fatty acid desaturase 8	1.4	0.00014	Up
11	11.3	lipid metabolism.phospholipid synthesis	AT2G30020	Protein phosphatase 2C family protein	-2.6	2e-06	Down
11	11.3	lipid metabolism.phospholipid synthesis	AT4G00400	glycerol-3-phosphate acyltransferase 8	2.4	0.0035	Up
11	11.3	lipid metabolism.phospholipid synthesis	AT4G01950	glycerol-3-phosphate acyltransferase 3	-2.8	0.0013	Down
11	11.3	lipid metabolism.phospholipid synthesis	AT5G34940	glucuronidase 3	1.5	0.00012	Up
11	11.3.1	lipid metabolism.phospholipid synthesis.1-acylglycerol-3-phosphate O-acyltransferase	AT3G18850	lysophosphatidyl acyltransferase 5	1.6	8.9e-05	Up
11	11.3.7	lipid metabolism.phospholipid synthesis.cyclopropane-fatty-acyl-phospholipid synthase	AT3G23480	Cyclopropane-fatty-acyl-phospholipid synthase	1.2	0.042	Up
11	11.3.7	lipid metabolism.phospholipid synthesis.cyclopropane-fatty-acyl-phospholipid synthase	AT3G23530	Cyclopropane-fatty-acyl-phospholipid synthase	6.6	0.00036	Up
11	11.4	lipid metabolism.TAG synthesis	AT3G01570	Oleosin family protein	-1.3	0.026	Down
11	11.4	lipid metabolism.TAG synthesis	AT3G27660	oleosin 4	1.6	0.00035	Up
11	11.4	lipid metabolism.TAG synthesis	AT5G07510	glycine-rich protein 14	3	0.015	Up
11	11.5.2	lipid metabolism.glycerol metabolism.glycerol-3-phosphate dehydrogenase (NAD+)	AT2G41540	6-phosphogluconate dehydrogenase family protein	1	0.024	Up
11	11.6	lipid metabolism.lipid transfer proteins etc	AT1G27950	glycosylphosphatidylinositol-anchored lipid protein transfer 1	2.2	0.00024	Up
11	11.6	lipid metabolism.lipid transfer proteins etc	AT1G55260	Bifunctional inhibitor/lipid-transfer protein/seed storage 2S albumin superfamily protein	4.1	2.4e-05	Up
11	11.6	lipid metabolism.lipid transfer proteins etc	AT3G51600	lipid transfer protein 5	2.1	9.3e-06	Up
11	11.6	lipid metabolism.lipid transfer proteins etc	AT5G65690	phosphoenolpyruvate carboxykinase 2	-2.5	0.01	Down
11	11.8	lipid metabolism.exotics (steroids, squalene etc)	AT1G13420	sulfotransferase 4B	4.8	0.0022	Up
11	11.8	lipid metabolism.exotics (steroids, squalene etc)	AT1G13430	sulfotransferase 4C	10	0.00034	Up
11	11.8	lipid metabolism.exotics (steroids, squalene etc)	AT1G66960	Terpenoid cyclases family protein	4.1	0.019	Up
11	11.8	lipid metabolism.exotics (steroids, squalene etc)	AT1G78950	Terpenoid cyclases family protein	7.1	5.8e-06	Up
11	11.8	lipid metabolism.exotics (steroids, squalene etc)	AT2G03760	sulfotransferase 12	1.8	0.004	Up
11	11.8	lipid metabolism.exotics (steroids, squalene etc)	AT2G22830	squalene epoxidase 2	1.1	0.023	Up
11	11.8	lipid metabolism.exotics (steroids, squalene etc)	AT3G45070	P-loop containing nucleoside triphosphate hydrolases superfamily protein	5.5	7.2e-06	Up
11	11.8.1	lipid metabolism.exotics (steroids, squalene etc).sphingolipids	AT1G14290	sphingoid base hydroxylase 2	1.8	8.8e-05	Up
11	11.8.1	lipid metabolism.exotics (steroids, squalene etc).sphingolipids	AT1G77700	Pathogenesis-related thaumatin superfamily protein	1.1	0.011	Up
11	11.8.1	lipid metabolism.exotics (steroids, squalene etc).sphingolipids	AT3G61580	Fatty acid/sphingolipid desaturase	1.1	0.00035	Up
11	11.8.7	lipid metabolism.exotics (steroids, squalene etc).trans-2-enoyl-CoA reductase (NADPH)	AT3G55360	3-oxo-5-alpha-steroid 4-dehydrogenase family protein	1.2	0.007	Up
11	11.9.2	lipid metabolism.lipid degradation.lipases	AT1G10340	Ankyrin repeat family protein	-1.5	0.036	Down
11	11.9.2	lipid metabolism.lipid degradation.lipases	AT1G73480	alpha/beta-Hydrolases superfamily protein	-1.5	1.7e-11	Down
11	11.9.2	lipid metabolism.lipid degradation.lipases	AT2G24600	Ankyrin repeat family protein	-1.6	0.0072	Down
11	11.9.2	lipid metabolism.lipid degradation.lipases	AT2G27740	RAB6-interacting golgin (DUF662)	1.6	0.0027	Up
11	11.9.2	lipid metabolism.lipid degradation.lipases	AT2G28315	Nucleotide/sugar transporter family protein	1.6	0.00012	Up
11	11.9.2	lipid metabolism.lipid degradation.lipases	AT2G37585	Core-2/I-branching beta-1%2C6-N-acetylglucosaminyltransferase family protein	1.7	2.7e-07	Up
11	11.9.2	lipid metabolism.lipid degradation.lipases	AT3G52900	RAB6-interacting golgin (DUF662)	1.5	1.7e-05	Up
11	11.9.2	lipid metabolism.lipid degradation.lipases	AT4G18760	receptor like protein 51	2.2	0.0021	Up
11	11.9.2	lipid metabolism.lipid degradation.lipases	AT5G22140	FAD/NAD(P)-binding oxidoreductase family protein	1.3	0.0024	Up
11	11.9.2	lipid metabolism.lipid degradation.lipases	AT5G54710	Ankyrin repeat family protein	-1.3	1.2e-05	Down
11	11.9.2.1	lipid metabolism.lipid degradation.lipases.triacylglycerol lipase	AT2G30550	alpha/beta-Hydrolases superfamily protein	1.1	1.4e-07	Up
11	11.9.2.1	lipid metabolism.lipid degradation.lipases.triacylglycerol lipase	AT3G14360	alpha/beta-Hydrolases superfamily protein	1.3	0.00058	Up
11	11.9.2.1	lipid metabolism.lipid degradation.lipases.triacylglycerol lipase	AT4G18550	alpha/beta-Hydrolases superfamily protein	1.1	1.3e-07	Up
11	11.9.2.1	lipid metabolism.lipid degradation.lipases.triacylglycerol lipase	AT5G14180	Myzus persicae-induced lipase 1	2.6	0.0025	Up
11	11.9.2.1	lipid metabolism.lipid degradation.lipases.triacylglycerol lipase	AT5G24210	alpha/beta-Hydrolases superfamily protein	-1.9	4.8e-06	Down
11	11.9.2.1	lipid metabolism.lipid degradation.lipases.triacylglycerol lipase	AT5G42930	alpha/beta-Hydrolases superfamily protein	2.2	0.012	Up
11	11.9.3	lipid metabolism.lipid degradation.lysophospholipases	AT3G55940	Phosphoinositide-specific phospholipase C family protein	1.3	0.033	Up
11	11.9.3	lipid metabolism.lipid degradation.lysophospholipases	AT5G41060	DHHC-type zinc finger family protein	1.2	0.0011	Up
11	11.9.3.1	lipid metabolism.lipid degradation.lysophospholipases.phospholipase D	AT1G55180	phospholipase D alpha 4	2.8	9.4e-08	Up
11	11.9.3.1	lipid metabolism.lipid degradation.lysophospholipases.phospholipase D	AT5G25370	phospholipase D alpha 3	1.7	3.4e-05	Up
11	11.9.3.2	lipid metabolism.lipid degradation.lysophospholipases.carboxylesterase	AT1G19190	alpha/beta-Hydrolases superfamily protein	1.4	0.00042	Up
11	11.9.3.2	lipid metabolism.lipid degradation.lysophospholipases.carboxylesterase	AT1G68620	alpha/beta-Hydrolases superfamily protein	-1.7	0.0035	Down
11	11.9.3.3	lipid metabolism.lipid degradation.lysophospholipases.glycerophosphodiester phosphodiesterase	AT5G55480	SHV3-like 1	1.1	0.0011	Up
11	11.9.3.4	lipid metabolism.lipid degradation.lysophospholipases.phospholipase A2	AT2G06925	Phospholipase A2 family protein	1.1	0.021	Up
11	11.9.3.5	lipid metabolism.lipid degradation.lysophospholipases.phosphoinositide phospholipase C	AT3G18900	ternary complex factor MIP1 leucine-zipper protein	3.4	4.5e-08	Up
11	11.9.3.5	lipid metabolism.lipid degradation.lysophospholipases.phosphoinositide phospholipase C	AT5G66210	calcium-dependent protein kinase 28	-1.6	1.2e-05	Down
11	11.9.4.3	lipid metabolism.lipid degradation.beta-oxidation.enoyl CoA hydratase	AT1G06550	ATP-dependent caseinolytic (Clp) protease/crotonase family protein	1.2	0.00011	Up
11	11.9.4.3	lipid metabolism.lipid degradation.beta-oxidation.enoyl CoA hydratase	AT4G14440	3-hydroxyacyl-CoA dehydratase 1	2.2	3e-07	Up
11	11.9.4.3	lipid metabolism.lipid degradation.beta-oxidation.enoyl CoA hydratase	AT4G28250	expansin B3	2.8	6.1e-07	Up
11	11.9.4.5	lipid metabolism.lipid degradation.beta-oxidation.acyl-CoA thioesterase	AT1G19190	alpha/beta-Hydrolases superfamily protein	1.4	0.00042	Up
11	11.9.4.5	lipid metabolism.lipid degradation.beta-oxidation.acyl-CoA thioesterase	AT1G35290	Thioesterase superfamily protein	1.1	6.2e-05	Up
11	11.9.4.13	lipid metabolism.lipid degradation.beta-oxidation.acyl CoA reductase	AT4G33790	Jojoba acyl CoA reductase-related male sterility protein	4.7	4e-07	Up
11	11.10.1	lipid metabolism.glycolipid synthesis.MGDG synthase	AT2G11810	monogalactosyldiacylglycerol synthase type C	-1.4	0.0022	Down
12	12.1.1	N-metabolism.nitrate metabolism.NR	AT1G37130	nitrate reductase 2	-1.6	1.4e-06	Down
12	12.1.1	N-metabolism.nitrate metabolism.NR	AT1G77760	nitrate reductase 1	-1.8	4.1e-05	Down
12	12.1.1	N-metabolism.nitrate metabolism.NR	AT2G32720	cytochrome B5 isoform B	1.5	2.4e-05	Up
12	12.1.1	N-metabolism.nitrate metabolism.NR	AT3G61580	Fatty acid/sphingolipid desaturase	1.1	0.00035	Up
12	12.1.2	N-metabolism.nitrate metabolism.nitrite reductase	AT2G15620	nitrite reductase 1	-2.2	3e-06	Down
12	12.2.1.1	N-metabolism.ammonia metabolism.glutamate synthase.ferredoxin dependent	AT5G53460	NADH-dependent glutamate synthase 1	-1.7	2e-11	Down
12	12.2.1.2	N-metabolism.ammonia metabolism.glutamate synthase.NADH dependent	AT5G53460	NADH-dependent glutamate synthase 1	-1.7	2e-11	Down
12	12.2.2	N-metabolism.ammonia metabolism.glutamine synthetase	AT1G66200	hypothetical protein	-1.3	2.5e-16	Down
12	12.2.2	N-metabolism.ammonia metabolism.glutamine synthetase	AT3G10080	RmlC-like cupins superfamily protein	2.1	7.1e-06	Up
12	12.2.2	N-metabolism.ammonia metabolism.glutamine synthetase	AT5G13460	IQ-domain 11	1.7	0.00029	Up
12	12.2.2	N-metabolism.ammonia metabolism.glutamine synthetase	AT5G39130	RmlC-like cupins superfamily protein	2.2	5.5e-09	Up
12	12.2.2	N-metabolism.ammonia metabolism.glutamine synthetase	AT5G39160	RmlC-like cupins superfamily protein	2.4	0.00031	Up
12	12.2.2	N-metabolism.ammonia metabolism.glutamine synthetase	AT5G39190	germin-like protein 2	2.5	2.3e-05	Up
12	12.2.2	N-metabolism.ammonia metabolism.glutamine synthetase	AT5G61750	RmlC-like cupins superfamily protein	1.7	0.0015	Up
12	12.2.99	N-metabolism.ammonia metabolism.unspecified	AT1G06640	2-oxoglutarate (2OG) and Fe(II)-dependent oxygenase superfamily protein	1.5	3.3e-06	Up
12	12.4	N-metabolism.misc	AT4G23720	transmembrane protein%2C putative (DUF1191)	2.6	0.022	Up
13	13.1.1.1.2	amino acid metabolism.synthesis.central amino acid metabolism.GABA.GABA transaminase	AT1G56130	Leucine-rich repeat transmembrane protein kinase	-1.2	0.0038	Down
13	13.1.1.2.1	amino acid metabolism.synthesis.central amino acid metabolism.aspartate.aspartate aminotransferase	AT1G62800	aspartate aminotransferase 4	1.3	2.1e-09	Up
13	13.1.1.2.1	amino acid metabolism.synthesis.central amino acid metabolism.aspartate.aspartate aminotransferase	AT2G22250	aspartate aminotransferase	1.4	7.1e-07	Up
13	13.1.1.2.1	amino acid metabolism.synthesis.central amino acid metabolism.aspartate.aspartate aminotransferase	AT2G30970	aspartate aminotransferase 1	-1	2.1e-08	Down
13	13.1.2.2.1	amino acid metabolism.synthesis.glutamate family.proline.delta 1-pyrroline-5-carboxylate synthetase	AT2G39800	delta1-pyrroline-5-carboxylate synthase 1	1.4	0.0035	Up
13	13.1.2.2.1	amino acid metabolism.synthesis.glutamate family.proline.delta 1-pyrroline-5-carboxylate synthetase	AT3G55610	delta 1-pyrroline-5-carboxylate synthase 2	-1	9e-05	Down
13	13.1.2.3	amino acid metabolism.synthesis.glutamate family.arginine	AT3G27050	plant/protein	1.1	7e-06	Up
13	13.1.3.1.1	amino acid metabolism.synthesis.aspartate family.asparagine.asparagine synthetase	AT5G65010	asparagine synthetase 2	-1.8	7.2e-05	Down
13	13.1.3.4	amino acid metabolism.synthesis.aspartate family.methionine	AT1G62422	hypothetical protein	-1	0.00032	Down
13	13.1.3.4	amino acid metabolism.synthesis.aspartate family.methionine	AT3G50240	ATP binding microtubule motor family protein	1.2	0.0013	Up
13	13.1.3.4	amino acid metabolism.synthesis.aspartate family.methionine	AT5G15630	COBRA-like extracellular glycosyl-phosphatidyl inositol-anchored protein family	1.7	0.00026	Up
13	13.1.3.4	amino acid metabolism.synthesis.aspartate family.methionine	AT5G60930	P-loop containing nucleoside triphosphate hydrolases superfamily protein	1.5	0.0016	Up
13	13.1.3.4.3	amino acid metabolism.synthesis.aspartate family.methionine.methionine synthase	AT3G03780	methionine synthase 2	1.9	2.7e-05	Up
13	13.1.3.4.3	amino acid metabolism.synthesis.aspartate family.methionine.methionine synthase	AT5G17920	Cobalamin-independent synthase family protein	1.3	3.1e-05	Up
13	13.1.3.4.11	amino acid metabolism.synthesis.aspartate family.methionine.S-adenosylmethionine synthetase	AT2G36880	methionine adenosyltransferase 3	1.5	2.6e-05	Up
13	13.1.3.4.11	amino acid metabolism.synthesis.aspartate family.methionine.S-adenosylmethionine synthetase	AT4G01850	S-adenosylmethionine synthetase 2	1.2	7.9e-06	Up
13	13.1.3.4.12	amino acid metabolism.synthesis.aspartate family.methionine.homocysteine S-methyltransferase	AT3G22740	homocysteine S-methyltransferase 3	1.8	0.013	Up
13	13.1.3.4.12	amino acid metabolism.synthesis.aspartate family.methionine.homocysteine S-methyltransferase	AT3G25900	Homocysteine S-methyltransferase family protein	2.3	0.0047	Up
13	13.1.3.5.5	amino acid metabolism.synthesis.aspartate family.lysine.diaminopimelate decarboxylase	AT5G47960	RAB GTPase homolog A4C	-1.9	2.6e-09	Down
13	13.1.3.6.1.1	amino acid metabolism.synthesis.aspartate family.misc.homoserine.aspartate kinase	AT3G02020	aspartate kinase 3	1.3	0.028	Up
13	13.1.3.6.1.4	amino acid metabolism.synthesis.aspartate family.misc.homoserine.homoserine kinase	AT1G06440	Ubiquitin carboxyl-terminal hydrolase family protein	-1	0.009	Down
13	13.1.3.6.1.4	amino acid metabolism.synthesis.aspartate family.misc.homoserine.homoserine kinase	AT3G18850	lysophosphatidyl acyltransferase 5	1.6	8.9e-05	Up
13	13.1.3.6.1.4	amino acid metabolism.synthesis.aspartate family.misc.homoserine.homoserine kinase	AT3G26060	Thioredoxin superfamily protein	1.3	7.7e-05	Up
13	13.1.4.1.4	amino acid metabolism.synthesis.branched chain group.common.branched-chain-amino-acid aminotransferase	AT1G50110	D-aminoacid aminotransferase-like PLP-dependent enzymes superfamily protein	-1.3	5.6e-05	Down
13	13.1.4.1.4	amino acid metabolism.synthesis.branched chain group.common.branched-chain-amino-acid aminotransferase	AT3G19710	branched-chain aminotransferase4	1.2	0.03	Up
13	13.1.4.4	amino acid metabolism.synthesis.branched chain group.leucine specific	AT3G17070	Peroxidase family protein	1	0.0021	Up
13	13.1.4.4.3	amino acid metabolism.synthesis.branched chain group.leucine specific.3-isopropylmalate dehydrogenase	AT5G14200	isopropylmalate dehydrogenase 1	1.6	0.0021	Up
13	13.1.4.5	amino acid metabolism.synthesis.branched chain group.isoleucine specific	AT3G54560	histone H2A 11	1.8	0.004	Up
13	13.1.5.1.2	amino acid metabolism.synthesis.serine-glycine-cysteine group.serine.phosphoserine aminotransferase	AT3G19030	transcription initiation factor TFIID subunit 1b-like protein	-2.3	7.8e-08	Down
13	13.1.5.2	amino acid metabolism.synthesis.serine-glycine-cysteine group.glycine	AT4G13930	serine hydroxymethyltransferase 4	1.8	1.1e-05	Up
13	13.1.5.3	amino acid metabolism.synthesis.serine-glycine-cysteine group.cysteine	AT5G15120	2-aminoethanethiol dioxygenase%2C putative (DUF1637)	1.5	0.00042	Up
13	13.1.5.3.1	amino acid metabolism.synthesis.serine-glycine-cysteine group.cysteine.OASTL	AT2G30150	UDP-Glycosyltransferase superfamily protein	2.2	5e-06	Up
13	13.1.5.3.1	amino acid metabolism.synthesis.serine-glycine-cysteine group.cysteine.OASTL	AT3G22460	O-acetylserine (thiol) lyase (OAS-TL) isoform A2	-1	0.0069	Down
13	13.1.5.3.1	amino acid metabolism.synthesis.serine-glycine-cysteine group.cysteine.OASTL	AT4G27730	oligopeptide transporter 1	1.9	0.00065	Up
13	13.1.5.3.1	amino acid metabolism.synthesis.serine-glycine-cysteine group.cysteine.OASTL	AT5G64410	oligopeptide transporter 4	1.3	0.0065	Up
13	13.1.5.3.2	amino acid metabolism.synthesis.serine-glycine-cysteine group.cysteine.SAT	AT3G13110	serine acetyltransferase 2%3B2	-1.2	0.00077	Down
13	13.1.5.3.2	amino acid metabolism.synthesis.serine-glycine-cysteine group.cysteine.SAT	AT5G50120	Transducin/WD40 repeat-like superfamily protein	1.5	0.029	Up
13	13.1.6.1.1	amino acid metabolism.synthesis.aromatic aa.chorismate.3-deoxy-D-arabino-heptulosonate 7-phosphate synthase	AT1G22410	Class-II DAHP synthetase family protein	1.1	0.0015	Up
13	13.1.6.1.6	amino acid metabolism.synthesis.aromatic aa.chorismate.5-enolpyruvylshikimate-3-phosphate synthase	AT2G45300	RNA 3'-terminal phosphate cyclase/enolpyruvate transferase%2C alpha/beta	1.1	7.4e-05	Up
13	13.1.6.1.7	amino acid metabolism.synthesis.aromatic aa.chorismate.chorismate synthase	AT1G48850	chorismate synthase%2C putative / 5-enolpyruvylshikimate-3-phosphate phospholyase	1.1	2.6e-06	Up
13	13.1.6.1.7	amino acid metabolism.synthesis.aromatic aa.chorismate.chorismate synthase	AT1G66200	hypothetical protein	-1.3	2.5e-16	Down
13	13.1.6.1.7	amino acid metabolism.synthesis.aromatic aa.chorismate.chorismate synthase	AT3G50930	cytochrome BC1 synthesi	-2.6	5.8e-19	Down
13	13.1.6.1.7	amino acid metabolism.synthesis.aromatic aa.chorismate.chorismate synthase	AT3G50940	P-loop containing nucleoside triphosphate hydrolases superfamily protein	-1.1	0.013	Down
13	13.1.6.1.7	amino acid metabolism.synthesis.aromatic aa.chorismate.chorismate synthase	AT4G14780	Protein kinase superfamily protein	-2.8	0.00045	Down
13	13.1.6.1.7	amino acid metabolism.synthesis.aromatic aa.chorismate.chorismate synthase	AT4G33980	hypothetical protein	-1.2	4.9e-11	Down
13	13.1.6.1.7	amino acid metabolism.synthesis.aromatic aa.chorismate.chorismate synthase	AT5G04160	Nucleotide-sugar transporter family protein	1.2	5.4e-05	Up
13	13.1.6.1.7	amino acid metabolism.synthesis.aromatic aa.chorismate.chorismate synthase	AT5G17760	P-loop containing nucleoside triphosphate hydrolases superfamily protein	1.7	5.8e-07	Up
13	13.1.6.3.1	amino acid metabolism.synthesis.aromatic aa.phenylalanine.arogenate dehydratase / prephenate dehydratase	AT1G11790	arogenate dehydratase 1	1.2	2.1e-05	Up
13	13.1.6.5.3	amino acid metabolism.synthesis.aromatic aa.tryptophan.phosphoribosyanthranilate isomerase	AT4G00700	C2 calcium/lipid-binding plant phosphoribosyltransferase family protein	-2.9	5.3e-06	Down
13	13.1.7	amino acid metabolism.synthesis.histidine	AT1G32380	phosphoribosyl pyrophosphate (PRPP) synthase 2	-2	5.8e-19	Down
13	13.2.1.2	amino acid metabolism.degradation.central amino acid metabolism.aspartate	AT5G14760	L-aspartate oxidase	-1.7	2.3e-13	Down
13	13.2.2.1	amino acid metabolism.degradation.glutamate family.glutamine	AT5G48920	tracheary element differentiation-related 7	2.4	8.2e-06	Up
13	13.2.2.2	amino acid metabolism.degradation.glutamate family.proline	AT3G07130	purple acid phosphatase 15	1	0.04	Up
13	13.2.2.2	amino acid metabolism.degradation.glutamate family.proline	AT3G52820	purple acid phosphatase 22	3.5	8e-05	Up
13	13.2.2.3	amino acid metabolism.degradation.glutamate family.arginine	AT2G39800	delta1-pyrroline-5-carboxylate synthase 1	1.4	0.0035	Up
13	13.2.2.3	amino acid metabolism.degradation.glutamate family.arginine	AT3G55610	delta 1-pyrroline-5-carboxylate synthase 2	-1	9e-05	Down
13	13.2.2.3	amino acid metabolism.degradation.glutamate family.arginine	AT4G08870	Arginase/deacetylase superfamily protein	2.1	0.036	Up
13	13.2.3.2	amino acid metabolism.degradation.aspartate family.threonine	AT1G67190	F-box/RNI-like superfamily protein	1.1	5.2e-05	Up
13	13.2.3.2	amino acid metabolism.degradation.aspartate family.threonine	AT1G76520	Auxin efflux carrier family protein	-1.2	6e-07	Down
13	13.2.3.2	amino acid metabolism.degradation.aspartate family.threonine	AT1G80160	Lactoylglutathione lyase / glyoxalase I family protein	-1.2	0.013	Down
13	13.2.3.2	amino acid metabolism.degradation.aspartate family.threonine	AT2G33385	actin-related protein C2B	1.7	3.7e-05	Up
13	13.2.3.2	amino acid metabolism.degradation.aspartate family.threonine	AT4G35270	Plant regulator RWP-RK family protein	-1.3	0.00084	Down
13	13.2.3.4	amino acid metabolism.degradation.aspartate family.methionine	AT3G23810	S-adenosyl-l-homocysteine (SAH) hydrolase 2	1.9	2.3e-05	Up
13	13.2.3.4	amino acid metabolism.degradation.aspartate family.methionine	AT4G13940	S-adenosyl-L-homocysteine hydrolase	1.2	8e-08	Up
13	13.2.3.5	amino acid metabolism.degradation.aspartate family.lysine	AT1G06550	ATP-dependent caseinolytic (Clp) protease/crotonase family protein	1.2	0.00011	Up
13	13.2.3.5	amino acid metabolism.degradation.aspartate family.lysine	AT4G14440	3-hydroxyacyl-CoA dehydratase 1	2.2	3e-07	Up
13	13.2.3.5	amino acid metabolism.degradation.aspartate family.lysine	AT4G35190	Putative lysine decarboxylase family protein	1.3	0.00033	Up
13	13.2.3.5	amino acid metabolism.degradation.aspartate family.lysine	AT5G11950	Putative lysine decarboxylase family protein	1.1	0.00021	Up
13	13.2.4.1	amino acid metabolism.degradation.branched chain group.shared	AT4G14440	3-hydroxyacyl-CoA dehydratase 1	2.2	3e-07	Up
13	13.2.4.1	amino acid metabolism.degradation.branched chain group.shared	AT5G19970	GRAS family transcription factor family protein	-1.3	0.0015	Down
13	13.2.4.4	amino acid metabolism.degradation.branched chain group.leucine	AT2G26800	Aldolase superfamily protein	1.1	7.2e-07	Up
13	13.2.5.1	amino acid metabolism.degradation.serine-glycine-cysteine group.serine	AT4G22880	leucoanthocyanidin dioxygenase	-1.1	0.048	Down
13	13.2.5.2	amino acid metabolism.degradation.serine-glycine-cysteine group.glycine	AT1G11860	Glycine cleavage T-protein family	1.1	0.0008	Up
13	13.2.5.2	amino acid metabolism.degradation.serine-glycine-cysteine group.glycine	AT4G22880	leucoanthocyanidin dioxygenase	-1.1	0.048	Down
13	13.2.6.2	amino acid metabolism.degradation.aromatic aa.tyrosine	AT2G22250	aspartate aminotransferase	1.4	7.1e-07	Up
13	13.2.6.2	amino acid metabolism.degradation.aromatic aa.tyrosine	AT4G28680	L-tyrosine decarboxylase	3.6	0.039	Up
13	13.2.6.3	amino acid metabolism.degradation.aromatic aa.tryptophan	AT1G06550	ATP-dependent caseinolytic (Clp) protease/crotonase family protein	1.2	0.00011	Up
13	13.2.6.3	amino acid metabolism.degradation.aromatic aa.tryptophan	AT4G14440	3-hydroxyacyl-CoA dehydratase 1	2.2	3e-07	Up
13	13.99	amino acid metabolism.misc	AT1G69040	ACT domain repeat 4	-1.4	0.00024	Down
14	14.2	S-assimilation.APR	AT1G62180	5'adenylylphosphosulfate reductase 2	-1.5	4.1e-05	Down
14	14.15	S-assimilation.AKN	AT3G03900	adenosine-5'-phosphosulfate (APS) kinase 3	-1.5	7.3e-08	Down
15	15	metal handling	AT1G74290	alpha/beta-Hydrolases superfamily protein	-1.6	0.00062	Down
15	15	metal handling	AT2G29680	cell division control 6	7.9	0.01	Up
15	15	metal handling	AT3G16860	COBRA-like protein 8 precursor	-1.8	0.0031	Down
15	15	metal handling	AT4G14040	selenium-binding protein 2	1.4	0.00037	Up
15	15	metal handling	AT5G15630	COBRA-like extracellular glycosyl-phosphatidyl inositol-anchored protein family	1.7	0.00026	Up
15	15	metal handling	AT5G48290	Heavy metal transport/detoxification superfamily protein	1.6	0.019	Up
15	15.2	metal handling.binding, chelation and storage	AT1G02335	germin-like protein subfamily 2 member 2 precursor	1.9	2.8e-08	Up
15	15.2	metal handling.binding, chelation and storage	AT1G09240	nicotianamine synthase 3	-4.3	6.2e-25	Down
15	15.2	metal handling.binding, chelation and storage	AT1G23000	Heavy metal transport/detoxification superfamily protein	1.2	0.049	Up
15	15.2	metal handling.binding, chelation and storage	AT1G56210	Heavy metal transport/detoxification superfamily protein	1.2	4.5e-05	Up
15	15.2	metal handling.binding, chelation and storage	AT1G56430	nicotianamine synthase 4	-1.8	0.0034	Down
15	15.2	metal handling.binding, chelation and storage	AT1G60060	Serine/threonine-protein kinase WNK (With No Lysine)-like protein	1.7	2.3e-09	Up
15	15.2	metal handling.binding, chelation and storage	AT2G36880	methionine adenosyltransferase 3	1.5	2.6e-05	Up
15	15.2	metal handling.binding, chelation and storage	AT3G13110	serine acetyltransferase 2%3B2	-1.2	0.00077	Down
15	15.2	metal handling.binding, chelation and storage	AT3G24450	Heavy metal transport/detoxification superfamily protein	2.7	0.00033	Up
15	15.2	metal handling.binding, chelation and storage	AT3G48970	Heavy metal transport/detoxification superfamily protein	3.3	2.2e-06	Up
15	15.2	metal handling.binding, chelation and storage	AT3G51470	Protein phosphatase 2C family protein	3.3	0.015	Up
15	15.2	metal handling.binding, chelation and storage	AT3G53530	Chloroplast-targeted copper chaperone protein	3	1.3e-05	Up
15	15.2	metal handling.binding, chelation and storage	AT3G62020	germin-like protein 10	1.7	8.7e-06	Up
15	15.2	metal handling.binding, chelation and storage	AT4G01850	S-adenosylmethionine synthetase 2	1.2	7.9e-06	Up
15	15.2	metal handling.binding, chelation and storage	AT5G03380	Heavy metal transport/detoxification superfamily protein	-1.9	8.6e-13	Down
15	15.2	metal handling.binding, chelation and storage	AT5G24580	Heavy metal transport/detoxification superfamily protein	5.6	0.00024	Up
15	15.2	metal handling.binding, chelation and storage	AT5G46530	AWPM-19-like family protein	1.1	0.0017	Up
15	15.2	metal handling.binding, chelation and storage	AT5G66110	Heavy metal transport/detoxification superfamily protein	-1.5	0.014	Down
16	16.1	secondary metabolism.isoprenoids	AT1G01120	3-ketoacyl-CoA synthase 1	1.3	1.6e-08	Up
16	16.1	secondary metabolism.isoprenoids	AT1G04220	3-ketoacyl-CoA synthase 2	2.2	3.8e-09	Up
16	16.1	secondary metabolism.isoprenoids	AT1G21110	O-methyltransferase family protein	-2.5	0.00029	Down
16	16.1	secondary metabolism.isoprenoids	AT1G21120	O-methyltransferase family protein	-2.2	0.00055	Down
16	16.1	secondary metabolism.isoprenoids	AT1G21130	O-methyltransferase family protein	-2.7	2.8e-06	Down
16	16.1	secondary metabolism.isoprenoids	AT1G77530	O-methyltransferase family protein	-2.1	0.0049	Down
16	16.1	secondary metabolism.isoprenoids	AT3G50900	hypothetical protein	-1.3	2.5e-06	Down
16	16.1	secondary metabolism.isoprenoids	AT4G36500	hypothetical protein	-2	2.7e-12	Down
16	16.1.2	secondary metabolism.isoprenoids.mevalonate pathway	AT3G47090	Leucine-rich repeat protein kinase family protein	-1.1	0.0045	Down
16	16.1.2.3	secondary metabolism.isoprenoids.mevalonate pathway.HMG-CoA reductase	AT2G17370	3-hydroxy-3-methylglutaryl-CoA reductase 2	1.1	0.0056	Up
16	16.1.2.4	secondary metabolism.isoprenoids.mevalonate pathway.mevalonate kinase	AT5G27450	mevalonate kinase	1.5	0.004	Up
16	16.1.2.4	secondary metabolism.isoprenoids.mevalonate pathway.mevalonate kinase	AT5G48920	tracheary element differentiation-related 7	2.4	8.2e-06	Up
16	16.1.2.7	secondary metabolism.isoprenoids.mevalonate pathway.isopentenyl pyrophosphate:dimethyllallyl pyrophosphate isomerase	AT1G08380	photosystem I subunit O	1.2	0.00031	Up
16	16.1.2.7	secondary metabolism.isoprenoids.mevalonate pathway.isopentenyl pyrophosphate:dimethyllallyl pyrophosphate isomerase	AT1G15760	Sterile alpha motif (SAM) domain-containing protein	2.2	8.7e-05	Up
16	16.1.2.7	secondary metabolism.isoprenoids.mevalonate pathway.isopentenyl pyrophosphate:dimethyllallyl pyrophosphate isomerase	AT2G12462	sterile alpha motif (SAM) domain protein	2.2	0.0094	Up
16	16.1.2.9	secondary metabolism.isoprenoids.mevalonate pathway.farnesyl pyrophosphate synthetase	AT5G47770	farnesyl diphosphate synthase 1	1	0.0054	Up
16	16.1.3.3	secondary metabolism.isoprenoids.tocopherol biosynthesis.MPBQ/MSBQ methyltransferase	AT3G15990	sulfate transporter 3%3B4	-1.7	1.9e-05	Down
16	16.1.3.3	secondary metabolism.isoprenoids.tocopherol biosynthesis.MPBQ/MSBQ methyltransferase	AT3G51895	sulfate transporter 3%3B1	-1.1	0.00021	Down
16	16.1.3.3	secondary metabolism.isoprenoids.tocopherol biosynthesis.MPBQ/MSBQ methyltransferase	AT5G52280	Myosin heavy chain-related protein	1.7	2.2e-06	Up
16	16.1.5	secondary metabolism.isoprenoids.terpenoids	AT1G49580	Calcium-dependent protein kinase (CDPK) family protein	1.4	0.00041	Up
16	16.1.5	secondary metabolism.isoprenoids.terpenoids	AT1G61680	terpene synthase 14	7.9	0.017	Up
16	16.1.5	secondary metabolism.isoprenoids.terpenoids	AT1G65010	WEB family protein (DUF827)	1.7	9.4e-06	Up
16	16.1.5	secondary metabolism.isoprenoids.terpenoids	AT1G66960	Terpenoid cyclases family protein	4.1	0.019	Up
16	16.1.5	secondary metabolism.isoprenoids.terpenoids	AT1G78950	Terpenoid cyclases family protein	7.1	5.8e-06	Up
16	16.1.5	secondary metabolism.isoprenoids.terpenoids	AT2G28950	expansin A6	2.8	5.9e-06	Up
16	16.1.5	secondary metabolism.isoprenoids.terpenoids	AT2G37640	Barwin-like endoglucanases superfamily protein	4.5	1.1e-06	Up
16	16.1.5	secondary metabolism.isoprenoids.terpenoids	AT2G39700	expansin A4	2.3	1e-08	Up
16	16.1.5	secondary metabolism.isoprenoids.terpenoids	AT3G02930	weak chloroplast movement under blue light protein (DUF827)	1.3	0.00015	Up
16	16.1.5	secondary metabolism.isoprenoids.terpenoids	AT3G47090	Leucine-rich repeat protein kinase family protein	-1.1	0.0045	Down
16	16.1.5	secondary metabolism.isoprenoids.terpenoids	AT3G55500	expansin A16	8.2	7.1e-06	Up
16	16.1.5	secondary metabolism.isoprenoids.terpenoids	AT4G16740	terpene synthase 03	-1.2	0.023	Down
16	16.1.5	secondary metabolism.isoprenoids.terpenoids	AT4G27595	WEB family protein (DUF827)	2	2e-05	Up
16	16.1.5	secondary metabolism.isoprenoids.terpenoids	AT5G40310	Exonuclease family protein	-6.6	0.0012	Down
16	16.1.5	secondary metabolism.isoprenoids.terpenoids	AT5G60500	Undecaprenyl pyrophosphate synthetase family protein	2.7	0.0043	Up
16	16.2	secondary metabolism.phenylpropanoids	AT1G20010	tubulin beta-5 chain	1.9	5.4e-06	Up
16	16.2	secondary metabolism.phenylpropanoids	AT1G32100	pinoresinol reductase 1	1.1	0.0011	Up
16	16.2	secondary metabolism.phenylpropanoids	AT1G32910	HXXXD-type acyl-transferase family protein	-3.1	0.00052	Down
16	16.2	secondary metabolism.phenylpropanoids	AT1G75780	tubulin beta-1 chain	2.6	0.029	Up
16	16.2	secondary metabolism.phenylpropanoids	AT2G29130	laccase 2	1.8	0.022	Up
16	16.2	secondary metabolism.phenylpropanoids	AT2G29550	tubulin beta-7 chain	1.1	0.0025	Up
16	16.2	secondary metabolism.phenylpropanoids	AT2G38080	Laccase/Diphenol oxidase family protein	1.2	0.00032	Up
16	16.2	secondary metabolism.phenylpropanoids	AT2G40230	HXXXD-type acyl-transferase family protein	1.6	4e-07	Up
16	16.2	secondary metabolism.phenylpropanoids	AT3G03480	acetyl CoA:(Z)-3-hexen-1-ol acetyltransferase	-3.9	0.0047	Down
16	16.2	secondary metabolism.phenylpropanoids	AT3G20670	histone H2A 13	1.3	0.011	Up
16	16.2	secondary metabolism.phenylpropanoids	AT3G62160	HXXXD-type acyl-transferase family protein	3.5	0.00051	Up
16	16.2	secondary metabolism.phenylpropanoids	AT5G01190	laccase 10	3	2.7e-08	Up
16	16.2	secondary metabolism.phenylpropanoids	AT5G03260	laccase 11	2.7	3.2e-14	Up
16	16.2	secondary metabolism.phenylpropanoids	AT5G07870	HXXXD-type acyl-transferase family protein	1.2	0.0061	Up
16	16.2	secondary metabolism.phenylpropanoids	AT5G12250	beta-6 tubulin	1.6	2.1e-06	Up
16	16.2	secondary metabolism.phenylpropanoids	AT5G16410	HXXXD-type acyl-transferase family protein	2.1	4.7e-06	Up
16	16.2	secondary metabolism.phenylpropanoids	AT5G23860	tubulin beta 8	1.6	0.00015	Up
16	16.2	secondary metabolism.phenylpropanoids	AT5G44340	tubulin beta chain 4	1.5	1.9e-05	Up
16	16.2	secondary metabolism.phenylpropanoids	AT5G59870	histone H2A 6	2.5	0.00017	Up
16	16.2	secondary metabolism.phenylpropanoids	AT5G60020	laccase 17	1.7	0.00022	Up
16	16.2	secondary metabolism.phenylpropanoids	AT5G67160	HXXXD-type acyl-transferase family protein	1.1	8.8e-11	Up
16	16.2.1	secondary metabolism.phenylpropanoids.lignin biosynthesis	AT5G25110	CBL-interacting protein kinase 25	-1.5	0.00054	Down
16	16.2.1	secondary metabolism.phenylpropanoids.lignin biosynthesis	AT5G26310	UDP-Glycosyltransferase superfamily protein	-1.5	0.024	Down
16	16.2.1.1	secondary metabolism.phenylpropanoids.lignin biosynthesis.PAL	AT3G10340	phenylalanine ammonia-lyase 4	1.2	0.00011	Up
16	16.2.1.2	secondary metabolism.phenylpropanoids.lignin biosynthesis.C4H	AT2G30490	cinnamate-4-hydroxylase	1.2	0.00024	Up
16	16.2.1.3	secondary metabolism.phenylpropanoids.lignin biosynthesis.4CL	AT1G20510	OPC-8:0 CoA ligase1	-1.4	0.018	Down
16	16.2.1.3	secondary metabolism.phenylpropanoids.lignin biosynthesis.4CL	AT1G51680	4-coumarate:CoA ligase 1	1.3	0.00018	Up
16	16.2.1.4	secondary metabolism.phenylpropanoids.lignin biosynthesis.HCT	AT1G65450	HXXXD-type acyl-transferase family protein	9.2	9.4e-05	Up
16	16.2.1.4	secondary metabolism.phenylpropanoids.lignin biosynthesis.HCT	AT5G42930	alpha/beta-Hydrolases superfamily protein	2.2	0.012	Up
16	16.2.1.4	secondary metabolism.phenylpropanoids.lignin biosynthesis.HCT	AT5G48930	hydroxycinnamoyl-CoA shikimate/quinate hydroxycinnamoyl transferase	1	0.00082	Up
16	16.2.1.5	secondary metabolism.phenylpropanoids.lignin biosynthesis.C3H	AT2G40890	cytochrome P450%2C family 98%2C subfamily A%2C polypeptide 3	1.7	8.8e-07	Up
16	16.2.1.6	secondary metabolism.phenylpropanoids.lignin biosynthesis.CCoAOMT	AT4G34050	S-adenosyl-L-methionine-dependent methyltransferases superfamily protein	1.4	8.6e-06	Up
16	16.2.1.8	secondary metabolism.phenylpropanoids.lignin biosynthesis.F5H	AT5G04330	Cytochrome P450 superfamily protein	2	0.0002	Up
16	16.2.1.8	secondary metabolism.phenylpropanoids.lignin biosynthesis.F5H	AT5G16720	caldesmon-like protein (Protein of unknown function%2C DUF593)	1.5	0.00055	Up
16	16.2.1.10	secondary metabolism.phenylpropanoids.lignin biosynthesis.CAD	AT2G41640	Glycosyltransferase family 61 protein	-3.1	1.4e-09	Down
16	16.2.1.10	secondary metabolism.phenylpropanoids.lignin biosynthesis.CAD	AT3G14170	hypothetical protein (DUF936)	2	2e-05	Up
16	16.2.1.10	secondary metabolism.phenylpropanoids.lignin biosynthesis.CAD	AT3G19450	GroES-like zinc-binding alcohol dehydrogenase family protein	1.3	6.9e-05	Up
16	16.2.1.10	secondary metabolism.phenylpropanoids.lignin biosynthesis.CAD	AT3G48970	Heavy metal transport/detoxification superfamily protein	3.3	2.2e-06	Up
16	16.2.1.10	secondary metabolism.phenylpropanoids.lignin biosynthesis.CAD	AT4G13370	serine/arginine repetitive matrix protein%2C putative (DUF936)	1.3	0.029	Up
16	16.2.1.10	secondary metabolism.phenylpropanoids.lignin biosynthesis.CAD	AT4G39330	cinnamyl alcohol dehydrogenase 9	2.6	0.00027	Up
16	16.2.1.10	secondary metabolism.phenylpropanoids.lignin biosynthesis.CAD	AT5G13630	magnesium-chelatase subunit chlH%2C chloroplast%2C putative / Mg-protoporphyrin IX chelatase%2C putative (CHLH)	1.1	0.00021	Up
16	16.4.1	secondary metabolism.N misc.alkaloid-like	AT1G70670	Caleosin-related family protein	1.1	1.9e-05	Up
16	16.4.1	secondary metabolism.N misc.alkaloid-like	AT2G29370	NAD(P)-binding Rossmann-fold superfamily protein	-2	0.00081	Down
16	16.4.1	secondary metabolism.N misc.alkaloid-like	AT2G30020	Protein phosphatase 2C family protein	-2.6	2e-06	Down
16	16.4.1	secondary metabolism.N misc.alkaloid-like	AT3G46490	2-oxoglutarate (2OG) and Fe(II)-dependent oxygenase superfamily protein	10	0.0061	Up
16	16.4.1	secondary metabolism.N misc.alkaloid-like	AT3G57010	Calcium-dependent phosphotriesterase superfamily protein	2.7	1.3e-05	Up
16	16.4.1	secondary metabolism.N misc.alkaloid-like	AT4G28680	L-tyrosine decarboxylase	3.6	0.039	Up
16	16.4.1	secondary metabolism.N misc.alkaloid-like	AT5G26340	Major facilitator superfamily protein	-1.2	0.00057	Down
16	16.4.1	secondary metabolism.N misc.alkaloid-like	AT5G44390	FAD-binding Berberine family protein	3.1	0.0015	Up
16	16.4.1	secondary metabolism.N misc.alkaloid-like	AT5G46530	AWPM-19-like family protein	1.1	0.0017	Up
16	16.5.1.1.1.1	secondary metabolism.sulfur-containing.glucosinolates.synthesis.aliphatic.branched-chain amino acid aminotransferase (BCAT/MAAT)	AT1G50110	D-aminoacid aminotransferase-like PLP-dependent enzymes superfamily protein	-1.3	5.6e-05	Down
16	16.5.1.1.1.1	secondary metabolism.sulfur-containing.glucosinolates.synthesis.aliphatic.branched-chain amino acid aminotransferase (BCAT/MAAT)	AT3G19710	branched-chain aminotransferase4	1.2	0.03	Up
16	16.5.1.1.1.2	secondary metabolism.sulfur-containing.glucosinolates.synthesis.aliphatic.methylthioalkylmalate synthase (MAM)	AT5G23010	methylthioalkylmalate synthase 1	1.2	0.037	Up
16	16.5.1.1.1.2	secondary metabolism.sulfur-containing.glucosinolates.synthesis.aliphatic.methylthioalkylmalate synthase (MAM)	AT5G23020	2-isopropylmalate synthase 2	-3.3	0.03	Down
16	16.5.1.1.1.4	secondary metabolism.sulfur-containing.glucosinolates.synthesis.aliphatic.methylthioalkylmalate isomerase small subunit (MAM-IS)	AT2G43100	isopropylmalate isomerase 2	1.1	0.023	Up
16	16.5.1.1.1.5	secondary metabolism.sulfur-containing.glucosinolates.synthesis.aliphatic.methylthioalkylmalate dehydrogenase (MAM-DH)	AT5G14200	isopropylmalate dehydrogenase 1	1.6	0.0021	Up
16	16.5.1.1.1.6	secondary metabolism.sulfur-containing.glucosinolates.synthesis.aliphatic.CYP79F1/F2 monooxygenase	AT1G16410	cytochrome p450 79f1	1.3	0.023	Up
16	16.5.1.1.1.10	secondary metabolism.sulfur-containing.glucosinolates.synthesis.aliphatic.flavin-containing monooxygenase	AT1G62540	flavin-monooxygenase glucosinolate S-oxygenase 2	1.3	2.6e-05	Up
16	16.5.1.1.1.10	secondary metabolism.sulfur-containing.glucosinolates.synthesis.aliphatic.flavin-containing monooxygenase	AT1G65860	flavin-monooxygenase glucosinolate S-oxygenase 1	1.5	0.0016	Up
16	16.5.1.1.1.12	secondary metabolism.sulfur-containing.glucosinolates.synthesis.aliphatic.benzoate-CoA ligase	AT1G65880	benzoyloxyglucosinolate 1	7.6	0.044	Up
16	16.5.1.1.1.12	secondary metabolism.sulfur-containing.glucosinolates.synthesis.aliphatic.benzoate-CoA ligase	AT1G65890	acyl activating enzyme 12	2.3	0.025	Up
16	16.5.1.1.1.12	secondary metabolism.sulfur-containing.glucosinolates.synthesis.aliphatic.benzoate-CoA ligase	AT3G03190	glutathione S-transferase F11	1.9	2.3e-05	Up
16	16.5.1.1.1.12	secondary metabolism.sulfur-containing.glucosinolates.synthesis.aliphatic.benzoate-CoA ligase	AT5G17220	glutathione S-transferase phi 12	-1.3	0.006	Down
16	16.5.1.1.1.13	secondary metabolism.sulfur-containing.glucosinolates.synthesis.aliphatic.2-oxoglutarate-dependent dioxygenase	AT1G06640	2-oxoglutarate (2OG) and Fe(II)-dependent oxygenase superfamily protein	1.5	3.3e-06	Up
16	16.5.1.1.3.4	secondary metabolism.sulfur-containing.glucosinolates.synthesis.indole.cytochrome P450 monooxygenase	AT5G57220	cytochrome P450%2C family 81%2C subfamily F%2C polypeptide 2	-2.3	0.0014	Down
16	16.5.1.1.4.1	secondary metabolism.sulfur-containing.glucosinolates.synthesis.shared.CYP83B1 phenylacetaldoxime monooxygenase	AT3G26320	cytochrome P450%2C family 71%2C subfamily B%2C polypeptide 36	1.4	0.0057	Up
16	16.5.1.2.1	secondary metabolism.sulfur-containing.glucosinolates.regulation.aliphatic	AT1G18570	myb domain protein 51	-2.3	1e-10	Down
16	16.5.1.2.1	secondary metabolism.sulfur-containing.glucosinolates.regulation.aliphatic	AT5G07690	myb domain protein 29	1.3	0.0045	Up
16	16.5.1.2.1	secondary metabolism.sulfur-containing.glucosinolates.regulation.aliphatic	AT5G07700	myb domain protein 76	2.4	0.037	Up
16	16.5.1.2.3	secondary metabolism.sulfur-containing.glucosinolates.regulation.indole	AT1G18570	myb domain protein 51	-2.3	1e-10	Down
16	16.5.1.2.3	secondary metabolism.sulfur-containing.glucosinolates.regulation.indole	AT2G28510	Dof-type zinc finger DNA-binding family protein	1.1	1.3e-05	Up
16	16.5.1.2.3	secondary metabolism.sulfur-containing.glucosinolates.regulation.indole	AT3G09710	IQ-domain 1	1.7	6e-06	Up
16	16.5.1.2.3	secondary metabolism.sulfur-containing.glucosinolates.regulation.indole	AT3G45610	Dof-type zinc finger DNA-binding family protein	1.8	0.012	Up
16	16.5.1.2.3	secondary metabolism.sulfur-containing.glucosinolates.regulation.indole	AT3G52290	IQ-domain 3	1.3	2.2e-06	Up
16	16.5.1.2.3	secondary metabolism.sulfur-containing.glucosinolates.regulation.indole	AT5G07690	myb domain protein 29	1.3	0.0045	Up
16	16.5.1.2.3	secondary metabolism.sulfur-containing.glucosinolates.regulation.indole	AT5G07700	myb domain protein 76	2.4	0.037	Up
16	16.5.1.3.1	secondary metabolism.sulfur-containing.glucosinolates.degradation.myrosinase	AT1G58160	jacalin lectin-like protein	1.1	0.023	Up
16	16.5.1.3.1	secondary metabolism.sulfur-containing.glucosinolates.degradation.myrosinase	AT3G14220	GDSL-like Lipase/Acylhydrolase superfamily protein	1.1	0.00047	Up
16	16.5.1.3.1	secondary metabolism.sulfur-containing.glucosinolates.degradation.myrosinase	AT3G16470	Mannose-binding lectin superfamily protein	1.7	0.0012	Up
16	16.5.1.3.1	secondary metabolism.sulfur-containing.glucosinolates.degradation.myrosinase	AT5G49870	Mannose-binding lectin superfamily protein	2.6	0.012	Up
16	16.5.1.3.1.1	secondary metabolism.sulfur-containing.glucosinolates.degradation.myrosinase.TGG	AT5G25980	glucoside glucohydrolase 2	5.2	9e-08	Up
16	16.5.1.3.1.1	secondary metabolism.sulfur-containing.glucosinolates.degradation.myrosinase.TGG	AT5G26000	thioglucoside glucohydrolase 1	3.3	0.00027	Up
16	16.5.1.3.2.1	secondary metabolism.sulfur-containing.glucosinolates.degradation.nitrilespecifier protein.epithiospecifier protein	AT1G54040	epithiospecifier protein	1.6	0.01	Up
16	16.5.1.3.3	secondary metabolism.sulfur-containing.glucosinolates.degradation.nitrilase	AT3G44320	nitrilase 3	-1.1	0.03	Down
16	16.5.99.1	secondary metabolism.sulfur-containing.misc.alliinase	AT1G34040	Pyridoxal phosphate (PLP)-dependent transferases superfamily protein	1.1	0.011	Up
16	16.5.99.1	secondary metabolism.sulfur-containing.misc.alliinase	AT3G61580	Fatty acid/sphingolipid desaturase	1.1	0.00035	Up
16	16.5.99.1	secondary metabolism.sulfur-containing.misc.alliinase	AT4G24670	tryptophan aminotransferase related 2	-1	0.016	Down
16	16.7	secondary metabolism.wax	AT1G01120	3-ketoacyl-CoA synthase 1	1.3	1.6e-08	Up
16	16.7	secondary metabolism.wax	AT1G02205	Fatty acid hydroxylase superfamily	3	0.0003	Up
16	16.7	secondary metabolism.wax	AT1G04220	3-ketoacyl-CoA synthase 2	2.2	3.8e-09	Up
16	16.7	secondary metabolism.wax	AT1G67940	non-intrinsic ABC protein 3	-1.1	0.00028	Down
16	16.7	secondary metabolism.wax	AT3G50900	hypothetical protein	-1.3	2.5e-06	Down
16	16.7	secondary metabolism.wax	AT3G54560	histone H2A 11	1.8	0.004	Up
16	16.7	secondary metabolism.wax	AT4G36500	hypothetical protein	-2	2.7e-12	Down
16	16.7	secondary metabolism.wax	AT5G57800	Fatty acid hydroxylase superfamily	1.1	6.5e-07	Up
16	16.8.1	secondary metabolism.flavonoids.anthocyanins	AT1G66370	myb domain protein 113	3.4	0.00024	Up
16	16.8.1	secondary metabolism.flavonoids.anthocyanins	AT1G66380	myb domain protein 114	2.3	0.0022	Up
16	16.8.1	secondary metabolism.flavonoids.anthocyanins	AT2G22930	UDP-Glycosyltransferase superfamily protein	1	0.029	Up
16	16.8.1	secondary metabolism.flavonoids.anthocyanins	AT3G11180	2-oxoglutarate (2OG) and Fe(II)-dependent oxygenase superfamily protein	1.6	0.019	Up
16	16.8.1	secondary metabolism.flavonoids.anthocyanins	AT3G29630	UDP-Glycosyltransferase superfamily protein	2.1	3e-06	Up
16	16.8.1	secondary metabolism.flavonoids.anthocyanins	AT3G55970	jasmonate-regulated gene 21	-2.3	0.0083	Down
16	16.8.1	secondary metabolism.flavonoids.anthocyanins	AT4G09500	UDP-Glycosyltransferase superfamily protein	1.2	1.3e-05	Up
16	16.8.1	secondary metabolism.flavonoids.anthocyanins	AT5G54060	UDP-glucose:flavonoid 3-o-glucosyltransferase	-1.3	0.024	Down
16	16.8.1.1	secondary metabolism.flavonoids.anthocyanins.leucocyanidin dioxygenase	AT4G22880	leucoanthocyanidin dioxygenase	-1.1	0.048	Down
16	16.8.1.21	secondary metabolism.flavonoids.anthocyanins.anthocyanin 5-aromatic acyltransferase	AT3G29590	HXXXD-type acyl-transferase family protein	-1.2	0.033	Down
16	16.8.2	secondary metabolism.flavonoids.chalcones	AT1G53520	Chalcone-flavanone isomerase family protein	4.5	0.0091	Up
16	16.8.2	secondary metabolism.flavonoids.chalcones	AT5G13060	ARMADILLO BTB protein 1	3.5	0.035	Up
16	16.8.3	secondary metabolism.flavonoids.dihydroflavonols	AT1G01390	UDP-Glycosyltransferase superfamily protein	-1.4	0.00053	Down
16	16.8.3	secondary metabolism.flavonoids.dihydroflavonols	AT2G22930	UDP-Glycosyltransferase superfamily protein	1	0.029	Up
16	16.8.3	secondary metabolism.flavonoids.dihydroflavonols	AT2G29710	UDP-Glycosyltransferase superfamily protein	1.6	0.007	Up
16	16.8.3	secondary metabolism.flavonoids.dihydroflavonols	AT3G10720	Plant invertase/pectin methylesterase inhibitor superfamily	3.6	0.01	Up
16	16.8.3	secondary metabolism.flavonoids.dihydroflavonols	AT3G19000	2-oxoglutarate (2OG) and Fe(II)-dependent oxygenase superfamily protein	-1.2	0.0012	Down
16	16.8.3	secondary metabolism.flavonoids.dihydroflavonols	AT3G21780	UDP-glucosyl transferase 71B6	-2	1.1e-07	Down
16	16.8.3	secondary metabolism.flavonoids.dihydroflavonols	AT3G27050	plant/protein	1.1	7e-06	Up
16	16.8.3	secondary metabolism.flavonoids.dihydroflavonols	AT3G29630	UDP-Glycosyltransferase superfamily protein	2.1	3e-06	Up
16	16.8.3	secondary metabolism.flavonoids.dihydroflavonols	AT4G02320	Plant invertase/pectin methylesterase inhibitor superfamily	3.2	0.047	Up
16	16.8.3	secondary metabolism.flavonoids.dihydroflavonols	AT4G09500	UDP-Glycosyltransferase superfamily protein	1.2	1.3e-05	Up
16	16.8.3	secondary metabolism.flavonoids.dihydroflavonols	AT4G33220	pectin methylesterase 44	1.7	0.00094	Up
16	16.8.3	secondary metabolism.flavonoids.dihydroflavonols	AT5G04970	Plant invertase/pectin methylesterase inhibitor superfamily	4.1	0.0031	Up
16	16.8.3	secondary metabolism.flavonoids.dihydroflavonols	AT5G26310	UDP-Glycosyltransferase superfamily protein	-1.5	0.024	Down
16	16.8.3	secondary metabolism.flavonoids.dihydroflavonols	AT5G54060	UDP-glucose:flavonoid 3-o-glucosyltransferase	-1.3	0.024	Down
16	16.8.3.1	secondary metabolism.flavonoids.dihydroflavonols.dihydroflavonol 4-reductase	AT2G45400	NAD(P)-binding Rossmann-fold superfamily protein	3.9	1e-05	Up
16	16.8.3.1	secondary metabolism.flavonoids.dihydroflavonols.dihydroflavonol 4-reductase	AT5G42800	dihydroflavonol 4-reductase	-1.1	0.025	Down
16	16.8.4	secondary metabolism.flavonoids.flavonols	AT1G17020	senescence-related gene 1	-1.2	0.00083	Down
16	16.8.4	secondary metabolism.flavonoids.flavonols	AT1G21240	wall associated kinase 3	-1.8	1.6e-07	Down
16	16.8.4	secondary metabolism.flavonoids.flavonols	AT1G80340	gibberellin 3-oxidase 2	-2.1	0.013	Down
16	16.8.4	secondary metabolism.flavonoids.flavonols	AT2G36800	don-glucosyltransferase 1	-1.5	5.7e-09	Down
16	16.8.4	secondary metabolism.flavonoids.flavonols	AT3G11180	2-oxoglutarate (2OG) and Fe(II)-dependent oxygenase superfamily protein	1.6	0.019	Up
16	16.8.4	secondary metabolism.flavonoids.flavonols	AT5G45340	cytochrome P450%2C family 707%2C subfamily A%2C polypeptide 3	-3.9	3e-18	Down
16	16.8.5	secondary metabolism.flavonoids.isoflavonols	AT2G46630	serine/arginine repetitive matrix protein	1.6	2.3e-06	Up
16	16.8.5.1	secondary metabolism.flavonoids.isoflavonols.isoflavone reductase	AT1G32100	pinoresinol reductase 1	1.1	0.0011	Up
16	16.8.5.1	secondary metabolism.flavonoids.isoflavonols.isoflavone reductase	AT1G75260	oxidoreductases%2C acting on NADH or NADPH	1.1	0.0084	Up
16	16.8.5.1	secondary metabolism.flavonoids.isoflavonols.isoflavone reductase	AT1G75280	NmrA-like negative transcriptional regulator family protein	1.2	0.0026	Up
16	16.1	secondary metabolism.simple phenols	AT1G01390	UDP-Glycosyltransferase superfamily protein	-1.4	0.00053	Down
16	16.1	secondary metabolism.simple phenols	AT1G21110	O-methyltransferase family protein	-2.5	0.00029	Down
16	16.1	secondary metabolism.simple phenols	AT1G21120	O-methyltransferase family protein	-2.2	0.00055	Down
16	16.1	secondary metabolism.simple phenols	AT1G21130	O-methyltransferase family protein	-2.7	2.8e-06	Down
16	16.1	secondary metabolism.simple phenols	AT1G33030	O-methyltransferase family protein	-1.1	0.046	Down
16	16.1	secondary metabolism.simple phenols	AT1G77530	O-methyltransferase family protein	-2.1	0.0049	Down
16	16.1	secondary metabolism.simple phenols	AT2G29130	laccase 2	1.8	0.022	Up
16	16.1	secondary metabolism.simple phenols	AT2G38080	Laccase/Diphenol oxidase family protein	1.2	0.00032	Up
16	16.1	secondary metabolism.simple phenols	AT2G40370	laccase 5	2	4.5e-06	Up
16	16.1	secondary metabolism.simple phenols	AT2G46570	laccase 6	2	0.00012	Up
16	16.1	secondary metabolism.simple phenols	AT3G62930	Thioredoxin superfamily protein	-2.1	0.00034	Down
16	16.1	secondary metabolism.simple phenols	AT5G01190	laccase 10	3	2.7e-08	Up
16	16.1	secondary metabolism.simple phenols	AT5G03260	laccase 11	2.7	3.2e-14	Up
16	16.1	secondary metabolism.simple phenols	AT5G05390	laccase 12	2.5	5.5e-06	Up
16	16.1	secondary metabolism.simple phenols	AT5G18600	Thioredoxin superfamily protein	-1.8	7e-05	Down
16	16.1	secondary metabolism.simple phenols	AT5G60020	laccase 17	1.7	0.00022	Up
16	16.99	secondary metabolism.unspecified	AT3G01500	carbonic anhydrase 1	2.6	0.00036	Up
16	16.99	secondary metabolism.unspecified	AT5G14740	carbonic anhydrase 2	1.4	0.00062	Up
17	17.1.1	hormone metabolism.abscisic acid.synthesis-degradation	AT1G19950	HVA22-like protein H (ATHVA22H)	1.4	0.0015	Up
17	17.1.1	hormone metabolism.abscisic acid.synthesis-degradation	AT3G21780	UDP-glucosyl transferase 71B6	-2	1.1e-07	Down
17	17.1.1	hormone metabolism.abscisic acid.synthesis-degradation	AT5G09910	Ras-related small GTP-binding family protein	2.3	0.025	Up
17	17.1.1	hormone metabolism.abscisic acid.synthesis-degradation	AT5G51920	Pyridoxal phosphate (PLP)-dependent transferases superfamily protein	1.2	0.037	Up
17	17.1.1.1.10	hormone metabolism.abscisic acid.synthesis-degradation.synthesis.9-cis-epoxycarotenoid dioxygenase	AT3G14440	nine-cis-epoxycarotenoid dioxygenase 3	-2.9	9e-08	Down
17	17.1.1.1.10	hormone metabolism.abscisic acid.synthesis-degradation.synthesis.9-cis-epoxycarotenoid dioxygenase	AT4G32810	carotenoid cleavage dioxygenase 8	-1.2	0.037	Down
17	17.1.1.1.12	hormone metabolism.abscisic acid.synthesis-degradation.synthesis.abscisic aldehyde oxidase	AT1G04580	aldehyde oxidase 4	-2.6	0.0037	Down
17	17.1.1.1.12	hormone metabolism.abscisic acid.synthesis-degradation.synthesis.abscisic aldehyde oxidase	AT5G20960	aldehyde oxidase 1	-1.3	0.00015	Down
17	17.1.1.2.1	hormone metabolism.abscisic acid.synthesis-degradation.degradation.8-hydroxylase	AT5G45340	cytochrome P450%2C family 707%2C subfamily A%2C polypeptide 3	-3.9	3e-18	Down
17	17.1.2	hormone metabolism.abscisic acid.signal transduction	AT2G45300	RNA 3'-terminal phosphate cyclase/enolpyruvate transferase%2C alpha/beta	1.1	7.4e-05	Up
17	17.1.2	hormone metabolism.abscisic acid.signal transduction	AT5G25980	glucoside glucohydrolase 2	5.2	9e-08	Up
17	17.1.2	hormone metabolism.abscisic acid.signal transduction	AT5G26000	thioglucoside glucohydrolase 1	3.3	0.00027	Up
17	17.1.3	hormone metabolism.abscisic acid.induced-regulated-responsive-activated	AT3G11410	protein phosphatase 2CA	-1	0.00076	Down
17	17.1.3	hormone metabolism.abscisic acid.induced-regulated-responsive-activated	AT5G05420	FKBP-like peptidyl-prolyl cis-trans isomerase family protein	-2.2	0.038	Down
17	17.1.3	hormone metabolism.abscisic acid.induced-regulated-responsive-activated	AT5G15960	stress-responsive protein (KIN1) / stress-induced protein (KIN1)	1.4	0.02	Up
17	17.1.3	hormone metabolism.abscisic acid.induced-regulated-responsive-activated	AT5G15970	stress-responsive protein (KIN2) / stress-induced protein (KIN2) / cold-responsive protein (COR6.6) / cold-regulated protein (COR6.6)	1.1	0.007	Up
17	17.1.3	hormone metabolism.abscisic acid.induced-regulated-responsive-activated	AT5G23350	GRAM domain protein/ABA-responsive-like protein	2.4	0.013	Up
17	17.1.3	hormone metabolism.abscisic acid.induced-regulated-responsive-activated	AT5G23360	GRAM domain-containing protein / ABA-responsive protein-like protein	1.4	0.0058	Up
17	17.1.3	hormone metabolism.abscisic acid.induced-regulated-responsive-activated	AT5G23370	GRAM domain-containing protein / ABA-responsive protein-like protein	2.5	0.0023	Up
17	17.2.1	hormone metabolism.auxin.synthesis-degradation	AT1G23080	Auxin efflux carrier family protein	1	0.015	Up
17	17.2.1	hormone metabolism.auxin.synthesis-degradation	AT2G01420	Auxin efflux carrier family protein	1.1	0.0052	Up
17	17.2.1	hormone metabolism.auxin.synthesis-degradation	AT3G19250	transmembrane protein%2C putative (DUF677)	-1.5	0.00017	Down
17	17.2.1	hormone metabolism.auxin.synthesis-degradation	AT3G44320	nitrilase 3	-1.1	0.03	Down
17	17.2.1	hormone metabolism.auxin.synthesis-degradation	AT5G25980	glucoside glucohydrolase 2	5.2	9e-08	Up
17	17.2.1	hormone metabolism.auxin.synthesis-degradation	AT5G26000	thioglucoside glucohydrolase 1	3.3	0.00027	Up
17	17.2.1	hormone metabolism.auxin.synthesis-degradation	AT5G48600	structural maintenance of chromosome 3	1.2	0.00057	Up
17	17.2.1	hormone metabolism.auxin.synthesis-degradation	AT5G57090	Auxin efflux carrier family protein	8.2	0.028	Up
17	17.2.2	hormone metabolism.auxin.signal transduction	AT1G23080	Auxin efflux carrier family protein	1	0.015	Up
17	17.2.2	hormone metabolism.auxin.signal transduction	AT1G27940	P-glycoprotein 13	2.5	2.7e-07	Up
17	17.2.2	hormone metabolism.auxin.signal transduction	AT1G76520	Auxin efflux carrier family protein	-1.2	6e-07	Down
17	17.2.2	hormone metabolism.auxin.signal transduction	AT1G77690	like AUX1 3	1.8	0.0001	Up
17	17.2.2	hormone metabolism.auxin.signal transduction	AT2G01420	Auxin efflux carrier family protein	1.1	0.0052	Up
17	17.2.2	hormone metabolism.auxin.signal transduction	AT2G36910	ATP binding cassette subfamily B1	1.3	9.7e-07	Up
17	17.2.2	hormone metabolism.auxin.signal transduction	AT3G01570	Oleosin family protein	-1.3	0.026	Down
17	17.2.2	hormone metabolism.auxin.signal transduction	AT3G27660	oleosin 4	1.6	0.00035	Up
17	17.2.2	hormone metabolism.auxin.signal transduction	AT3G28360	P-glycoprotein 16	-2.7	0.0014	Down
17	17.2.2	hormone metabolism.auxin.signal transduction	AT3G28860	ATP binding cassette subfamily B19	1.4	0.007	Up
17	17.2.2	hormone metabolism.auxin.signal transduction	AT3G45280	syntaxin of plants 72	2.3	0.013	Up
17	17.2.2	hormone metabolism.auxin.signal transduction	AT3G62150	P-glycoprotein 21	-1.3	0.0013	Down
17	17.2.2	hormone metabolism.auxin.signal transduction	AT5G57090	Auxin efflux carrier family protein	8.2	0.028	Up
17	17.2.3	hormone metabolism.auxin.induced-regulated-responsive-activated	AT1G03220	Eukaryotic aspartyl protease family protein	-1.5	0.0056	Down
17	17.2.3	hormone metabolism.auxin.induced-regulated-responsive-activated	AT1G03230	Eukaryotic aspartyl protease family protein	-1.6	1.6e-06	Down
17	17.2.3	hormone metabolism.auxin.induced-regulated-responsive-activated	AT1G04250	AUX/IAA transcriptional regulator family protein	2.7	0.007	Up
17	17.2.3	hormone metabolism.auxin.induced-regulated-responsive-activated	AT1G16510	SAUR-like auxin-responsive protein family	2.1	7.3e-07	Up
17	17.2.3	hormone metabolism.auxin.induced-regulated-responsive-activated	AT1G19840	SAUR-like auxin-responsive protein family	1.1	0.016	Up
17	17.2.3	hormone metabolism.auxin.induced-regulated-responsive-activated	AT1G19850	Transcriptional factor B3 family protein / auxin-responsive factor AUX/IAA-like protein	1.6	0.00067	Up
17	17.2.3	hormone metabolism.auxin.induced-regulated-responsive-activated	AT1G22230	nucleolar GTP-binding protein	1.3	0.01	Up
17	17.2.3	hormone metabolism.auxin.induced-regulated-responsive-activated	AT1G29200	O-fucosyltransferase family protein	1.7	0.0029	Up
17	17.2.3	hormone metabolism.auxin.induced-regulated-responsive-activated	AT1G29430	SAUR-like auxin-responsive protein family	8	0.011	Up
17	17.2.3	hormone metabolism.auxin.induced-regulated-responsive-activated	AT1G29440	SAUR-like auxin-responsive protein family	5.8	0.017	Up
17	17.2.3	hormone metabolism.auxin.induced-regulated-responsive-activated	AT1G29450	SAUR-like auxin-responsive protein family	4.4	0.0038	Up
17	17.2.3	hormone metabolism.auxin.induced-regulated-responsive-activated	AT1G29490	SAUR-like auxin-responsive protein family	7.7	0.047	Up
17	17.2.3	hormone metabolism.auxin.induced-regulated-responsive-activated	AT1G29500	SAUR-like auxin-responsive protein family	5	1.7e-06	Up
17	17.2.3	hormone metabolism.auxin.induced-regulated-responsive-activated	AT1G29510	SAUR-like auxin-responsive protein family	9.4	0.0011	Up
17	17.2.3	hormone metabolism.auxin.induced-regulated-responsive-activated	AT1G56150	SAUR-like auxin-responsive protein family	2.6	0.00018	Up
17	17.2.3	hormone metabolism.auxin.induced-regulated-responsive-activated	AT1G63710	cytochrome P450%2C family 86%2C subfamily A%2C polypeptide 7	9.7	0.00095	Up
17	17.2.3	hormone metabolism.auxin.induced-regulated-responsive-activated	AT1G75590	SAUR-like auxin-responsive protein family	3.6	3.4e-14	Up
17	17.2.3	hormone metabolism.auxin.induced-regulated-responsive-activated	AT1G78170	E3 ubiquitin-protein ligase	1.9	0.026	Up
17	17.2.3	hormone metabolism.auxin.induced-regulated-responsive-activated	AT2G01818	PLATZ transcription factor family protein	2	0.0026	Up
17	17.2.3	hormone metabolism.auxin.induced-regulated-responsive-activated	AT2G04850	Auxin-responsive family protein	1.3	0.0015	Up
17	17.2.3	hormone metabolism.auxin.induced-regulated-responsive-activated	AT2G16580	SAUR-like auxin-responsive protein family	3.6	0.0005	Up
17	17.2.3	hormone metabolism.auxin.induced-regulated-responsive-activated	AT2G23170	Auxin-responsive GH3 family protein	1.9	0.033	Up
17	17.2.3	hormone metabolism.auxin.induced-regulated-responsive-activated	AT2G27930	PLATZ transcription factor family protein	3.3	0.00052	Up
17	17.2.3	hormone metabolism.auxin.induced-regulated-responsive-activated	AT2G28085	SAUR-like auxin-responsive protein family	8.5	0.0094	Up
17	17.2.3	hormone metabolism.auxin.induced-regulated-responsive-activated	AT2G35190	Putative plant snare 11	2.1	1.4e-05	Up
17	17.2.3	hormone metabolism.auxin.induced-regulated-responsive-activated	AT2G47750	putative indole-3-acetic acid-amido synthetase GH3.9	1.3	3.2e-06	Up
17	17.2.3	hormone metabolism.auxin.induced-regulated-responsive-activated	AT3G02250	O-fucosyltransferase family protein	1.4	2.1e-06	Up
17	17.2.3	hormone metabolism.auxin.induced-regulated-responsive-activated	AT3G03820	SAUR-like auxin-responsive protein family	4.3	0.0085	Up
17	17.2.3	hormone metabolism.auxin.induced-regulated-responsive-activated	AT3G03840	SAUR-like auxin-responsive protein family	8.3	0.0096	Up
17	17.2.3	hormone metabolism.auxin.induced-regulated-responsive-activated	AT3G03850	SAUR-like auxin-responsive protein family	7.4	0.036	Up
17	17.2.3	hormone metabolism.auxin.induced-regulated-responsive-activated	AT3G12955	SAUR-like auxin-responsive protein family	1.4	0.0035	Up
17	17.2.3	hormone metabolism.auxin.induced-regulated-responsive-activated	AT3G21190	O-fucosyltransferase family protein	1.7	2.1e-05	Up
17	17.2.3	hormone metabolism.auxin.induced-regulated-responsive-activated	AT3G23050	indole-3-acetic acid 7	1.8	0.00029	Up
17	17.2.3	hormone metabolism.auxin.induced-regulated-responsive-activated	AT3G61750	Cytochrome b561/ferric reductase transmembrane with DOMON related domain-containing protein	1.4	0.004	Up
17	17.2.3	hormone metabolism.auxin.induced-regulated-responsive-activated	AT4G00360	cytochrome P450%2C family 86%2C subfamily A%2C polypeptide 2	1.1	0.00032	Up
17	17.2.3	hormone metabolism.auxin.induced-regulated-responsive-activated	AT4G17280	Auxin-responsive family protein	2.5	0.0017	Up
17	17.2.3	hormone metabolism.auxin.induced-regulated-responsive-activated	AT4G22620	SAUR-like auxin-responsive protein family	5.1	0.036	Up
17	17.2.3	hormone metabolism.auxin.induced-regulated-responsive-activated	AT4G28640	indole-3-acetic acid inducible 11	1.1	0.00015	Up
17	17.2.3	hormone metabolism.auxin.induced-regulated-responsive-activated	AT4G32280	indole-3-acetic acid inducible 29	2	0.018	Up
17	17.2.3	hormone metabolism.auxin.induced-regulated-responsive-activated	AT4G34760	SAUR-like auxin-responsive protein family	5.5	0.00014	Up
17	17.2.3	hormone metabolism.auxin.induced-regulated-responsive-activated	AT4G38825	SAUR-like auxin-responsive protein family	8.8	0.0072	Up
17	17.2.3	hormone metabolism.auxin.induced-regulated-responsive-activated	AT5G15740	O-fucosyltransferase family protein	1.7	7.8e-05	Up
17	17.2.3	hormone metabolism.auxin.induced-regulated-responsive-activated	AT5G16486	RNA-directed DNA polymerase (reverse transcriptase)-related family protein	2.3	0.0037	Up
17	17.2.3	hormone metabolism.auxin.induced-regulated-responsive-activated	AT5G18010	SAUR-like auxin-responsive protein family	7.8	0.025	Up
17	17.2.3	hormone metabolism.auxin.induced-regulated-responsive-activated	AT5G18020	SAUR-like auxin-responsive protein family	8.8	0.0063	Up
17	17.2.3	hormone metabolism.auxin.induced-regulated-responsive-activated	AT5G18030	SAUR-like auxin-responsive protein family	8.3	0.0077	Up
17	17.2.3	hormone metabolism.auxin.induced-regulated-responsive-activated	AT5G18050	SAUR-like auxin-responsive protein family	7.7	0.027	Up
17	17.2.3	hormone metabolism.auxin.induced-regulated-responsive-activated	AT5G18060	SAUR-like auxin-responsive protein family	7.6	0.049	Up
17	17.2.3	hormone metabolism.auxin.induced-regulated-responsive-activated	AT5G18080	SAUR-like auxin-responsive protein family	3.8	0.015	Up
17	17.2.3	hormone metabolism.auxin.induced-regulated-responsive-activated	AT5G35735	Auxin-responsive family protein	-1.5	1.2e-05	Down
17	17.2.3	hormone metabolism.auxin.induced-regulated-responsive-activated	AT5G59720	heat shock protein 18.2	2.9	3.5e-05	Up
17	17.3.1	hormone metabolism.brassinosteroid.synthesis-degradation	AT2G36800	don-glucosyltransferase 1	-1.5	5.7e-09	Down
17	17.3.1.1.1	hormone metabolism.brassinosteroid.synthesis-degradation.BRs.DET2	AT1G02205	Fatty acid hydroxylase superfamily	3	0.0003	Up
17	17.3.1.1.1	hormone metabolism.brassinosteroid.synthesis-degradation.BRs.DET2	AT1G02335	germin-like protein subfamily 2 member 2 precursor	1.9	2.8e-08	Up
17	17.3.1.1.1	hormone metabolism.brassinosteroid.synthesis-degradation.BRs.DET2	AT1G27950	glycosylphosphatidylinositol-anchored lipid protein transfer 1	2.2	0.00024	Up
17	17.3.1.1.1	hormone metabolism.brassinosteroid.synthesis-degradation.BRs.DET2	AT1G45191	Glycosyl hydrolase superfamily protein	1.2	0.02	Up
17	17.3.1.1.1	hormone metabolism.brassinosteroid.synthesis-degradation.BRs.DET2	AT2G16230	O-Glycosyl hydrolases family 17 protein	2.9	0.0084	Up
17	17.3.1.1.1	hormone metabolism.brassinosteroid.synthesis-degradation.BRs.DET2	AT3G13110	serine acetyltransferase 2%3B2	-1.2	0.00077	Down
17	17.3.1.1.1	hormone metabolism.brassinosteroid.synthesis-degradation.BRs.DET2	AT3G18670	Ankyrin repeat family protein	1.8	0.016	Up
17	17.3.1.1.1	hormone metabolism.brassinosteroid.synthesis-degradation.BRs.DET2	AT3G23760	transferring glycosyl group transferase	1.1	0.016	Up
17	17.3.1.1.1	hormone metabolism.brassinosteroid.synthesis-degradation.BRs.DET2	AT3G60130	beta glucosidase 16	1.6	0.0035	Up
17	17.3.1.1.1	hormone metabolism.brassinosteroid.synthesis-degradation.BRs.DET2	AT3G62020	germin-like protein 10	1.7	8.7e-06	Up
17	17.3.1.1.1	hormone metabolism.brassinosteroid.synthesis-degradation.BRs.DET2	AT5G08370	alpha-galactosidase 2	1.2	0.00026	Up
17	17.3.1.1.2	hormone metabolism.brassinosteroid.synthesis-degradation.BRs.DWF4	AT3G50660	Cytochrome P450 superfamily protein	1.3	0.012	Up
17	17.3.1.1.4	hormone metabolism.brassinosteroid.synthesis-degradation.BRs.BR6OX	AT3G30180	brassinosteroid-6-oxidase 2	3	0.00085	Up
17	17.3.1.1.4	hormone metabolism.brassinosteroid.synthesis-degradation.BRs.BR6OX	AT5G38970	brassinosteroid-6-oxidase 1	5.7	0.03	Up
17	17.3.1.1.5	hormone metabolism.brassinosteroid.synthesis-degradation.BRs.metabolic regulation	AT1G13420	sulfotransferase 4B	4.8	0.0022	Up
17	17.3.1.1.5	hormone metabolism.brassinosteroid.synthesis-degradation.BRs.metabolic regulation	AT1G13430	sulfotransferase 4C	10	0.00034	Up
17	17.3.1.1.5	hormone metabolism.brassinosteroid.synthesis-degradation.BRs.metabolic regulation	AT1G17060	cytochrome p450 72c1	1.2	0.028	Up
17	17.3.1.1.5	hormone metabolism.brassinosteroid.synthesis-degradation.BRs.metabolic regulation	AT2G03760	sulfotransferase 12	1.8	0.004	Up
17	17.3.1.1.5	hormone metabolism.brassinosteroid.synthesis-degradation.BRs.metabolic regulation	AT3G14630	cytochrome P450%2C family 72%2C subfamily A%2C polypeptide 9	-3.3	0.00046	Down
17	17.3.1.1.5	hormone metabolism.brassinosteroid.synthesis-degradation.BRs.metabolic regulation	AT3G45070	P-loop containing nucleoside triphosphate hydrolases superfamily protein	5.5	7.2e-06	Up
17	17.3.1.2.1	hormone metabolism.brassinosteroid.synthesis-degradation.sterols.SMT1	AT1G13470	hypothetical protein (DUF1262)	-2.1	0.0026	Down
17	17.3.1.2.1	hormone metabolism.brassinosteroid.synthesis-degradation.sterols.SMT1	AT1G53180	hypothetical protein	1.1	0.043	Up
17	17.3.1.2.1	hormone metabolism.brassinosteroid.synthesis-degradation.sterols.SMT1	AT2G42320	nucleolar protein gar2-like protein	1.5	0.0012	Up
17	17.3.1.2.1	hormone metabolism.brassinosteroid.synthesis-degradation.sterols.SMT1	AT3G57780	nucleolar-like protein	1.6	0.00022	Up
17	17.3.1.2.1	hormone metabolism.brassinosteroid.synthesis-degradation.sterols.SMT1	AT5G06930	nucleolar-like protein	1.7	9.9e-07	Up
17	17.3.1.2.1	hormone metabolism.brassinosteroid.synthesis-degradation.sterols.SMT1	AT5G10580	plant/protein (Protein of unknown function%2C DUF599)	1.1	0.026	Up
17	17.3.1.2.1	hormone metabolism.brassinosteroid.synthesis-degradation.sterols.SMT1	AT5G13710	sterol methyltransferase 1	1	0.0015	Up
17	17.3.1.2.2	hormone metabolism.brassinosteroid.synthesis-degradation.sterols.SMT2	AT4G02290	glycosyl hydrolase 9B13	5	0.00026	Up
17	17.3.1.2.2	hormone metabolism.brassinosteroid.synthesis-degradation.sterols.SMT2	AT5G13710	sterol methyltransferase 1	1	0.0015	Up
17	17.3.1.2.6	hormone metabolism.brassinosteroid.synthesis-degradation.sterols.DWF7	AT3G02590	Fatty acid hydroxylase superfamily protein	2.8	0.025	Up
17	17.3.1.2.7	hormone metabolism.brassinosteroid.synthesis-degradation.sterols.DWF5	AT1G24120	ARG1-like 1	1	8.6e-07	Up
17	17.3.1.2.7	hormone metabolism.brassinosteroid.synthesis-degradation.sterols.DWF5	AT2G37380	membrane-associated kinase regulator	7	0.045	Up
17	17.3.1.2.7	hormone metabolism.brassinosteroid.synthesis-degradation.sterols.DWF5	AT2G45750	S-adenosyl-L-methionine-dependent methyltransferases superfamily protein	1.4	0.00069	Up
17	17.3.1.2.7	hormone metabolism.brassinosteroid.synthesis-degradation.sterols.DWF5	AT3G55880	Alpha/beta hydrolase related protein	-1.4	1.2e-07	Down
17	17.3.1.2.7	hormone metabolism.brassinosteroid.synthesis-degradation.sterols.DWF5	AT4G00750	S-adenosyl-L-methionine-dependent methyltransferases superfamily protein	-1.4	1.7e-12	Down
17	17.3.1.2.7	hormone metabolism.brassinosteroid.synthesis-degradation.sterols.DWF5	AT4G10440	S-adenosyl-L-methionine-dependent methyltransferases superfamily protein	-1.5	0.048	Down
17	17.3.1.2.7	hormone metabolism.brassinosteroid.synthesis-degradation.sterols.DWF5	AT4G13930	serine hydroxymethyltransferase 4	1.8	1.1e-05	Up
17	17.3.1.2.7	hormone metabolism.brassinosteroid.synthesis-degradation.sterols.DWF5	AT4G19120	S-adenosyl-L-methionine-dependent methyltransferases superfamily protein	2	9.3e-06	Up
17	17.3.1.2.7	hormone metabolism.brassinosteroid.synthesis-degradation.sterols.DWF5	AT5G16740	Transmembrane amino acid transporter family protein	-2.7	0.00061	Down
17	17.3.1.2.99	hormone metabolism.brassinosteroid.synthesis-degradation.sterols.other	AT1G66960	Terpenoid cyclases family protein	4.1	0.019	Up
17	17.3.1.2.99	hormone metabolism.brassinosteroid.synthesis-degradation.sterols.other	AT1G78950	Terpenoid cyclases family protein	7.1	5.8e-06	Up
17	17.3.1.2.99	hormone metabolism.brassinosteroid.synthesis-degradation.sterols.other	AT2G22830	squalene epoxidase 2	1.1	0.023	Up
17	17.3.2.1	hormone metabolism.brassinosteroid.signal transduction.BRI	AT1G77400	extensin-like protein	-1.5	2.2e-07	Down
17	17.3.2.1	hormone metabolism.brassinosteroid.signal transduction.BRI	AT2G01950	BRI1-like 2	1.3	0.00025	Up
17	17.3.2.1	hormone metabolism.brassinosteroid.signal transduction.BRI	AT2G15080	receptor like protein 19	-1.1	0.00083	Down
17	17.3.2.1	hormone metabolism.brassinosteroid.signal transduction.BRI	AT2G25440	receptor like protein 20	-2.2	0.00071	Down
17	17.3.2.1	hormone metabolism.brassinosteroid.signal transduction.BRI	AT2G32680	receptor like protein 23	-2.1	0.00021	Down
17	17.3.2.1	hormone metabolism.brassinosteroid.signal transduction.BRI	AT3G11010	receptor like protein 34	-1.3	0.0016	Down
17	17.3.2.1	hormone metabolism.brassinosteroid.signal transduction.BRI	AT3G11080	receptor like protein 35	-1.5	0.0003	Down
17	17.3.2.1	hormone metabolism.brassinosteroid.signal transduction.BRI	AT3G51740	inflorescence meristem receptor-like kinase 2	2.4	1.2e-05	Up
17	17.3.2.1	hormone metabolism.brassinosteroid.signal transduction.BRI	AT4G13920	receptor like protein 50	-1.1	0.006	Down
17	17.3.2.1	hormone metabolism.brassinosteroid.signal transduction.BRI	AT5G25910	receptor like protein 52	-1.3	0.024	Down
17	17.3.2.99	hormone metabolism.brassinosteroid.signal transduction.other	AT1G71830	somatic embryogenesis receptor-like kinase 1	1.1	0.0054	Up
17	17.3.2.99	hormone metabolism.brassinosteroid.signal transduction.other	AT3G25560	NSP-interacting kinase 2	1.2	0.00015	Up
17	17.3.2.99	hormone metabolism.brassinosteroid.signal transduction.other	AT5G16000	NSP-interacting kinase 1	1.5	3.4e-05	Up
17	17.3.2.99	hormone metabolism.brassinosteroid.signal transduction.other	AT5G51550	EXORDIUM like 3	1.6	0.0069	Up
17	17.3.3	hormone metabolism.brassinosteroid.induced-regulated-responsive-activated	AT3G51325	RING/U-box superfamily protein	1.3	0.0016	Up
17	17.3.3	hormone metabolism.brassinosteroid.induced-regulated-responsive-activated	AT4G27280	Calcium-binding EF-hand family protein	-1.8	5.3e-13	Down
17	17.3.3	hormone metabolism.brassinosteroid.induced-regulated-responsive-activated	AT5G54490	pinoid-binding protein 1	-1.6	5.6e-06	Down
17	17.4.1	hormone metabolism.cytokinin.synthesis-degradation	AT1G06980	6%2C7-dimethyl-8-ribityllumazine synthase	5.7	0.017	Up
17	17.4.1	hormone metabolism.cytokinin.synthesis-degradation	AT1G22340	UDP-glucosyl transferase 85A7	1.9	0.04	Up
17	17.4.1	hormone metabolism.cytokinin.synthesis-degradation	AT1G29195	phosphatidylinositol 4-phosphate 5-kinase MSS4-like protein	1.6	0.013	Up
17	17.4.1	hormone metabolism.cytokinin.synthesis-degradation	AT1G71015	plastid movement impaired protein	2.4	0.0097	Up
17	17.4.1	hormone metabolism.cytokinin.synthesis-degradation	AT2G01340	plastid movement impaired protein	-1.4	0.012	Down
17	17.4.1	hormone metabolism.cytokinin.synthesis-degradation	AT2G25735	hypothetical protein	-3.8	1.2e-13	Down
17	17.4.1	hormone metabolism.cytokinin.synthesis-degradation	AT2G36800	don-glucosyltransferase 1	-1.5	5.7e-09	Down
17	17.4.1	hormone metabolism.cytokinin.synthesis-degradation	AT3G46670	UDP-glucosyl transferase 76E11	3.9	0.0046	Up
17	17.4.1	hormone metabolism.cytokinin.synthesis-degradation	AT3G55710	UDP-Glycosyltransferase superfamily protein	1.8	0.0022	Up
17	17.4.1	hormone metabolism.cytokinin.synthesis-degradation	AT3G63110	isopentenyltransferase 3	-1.7	7.6e-05	Down
17	17.4.1	hormone metabolism.cytokinin.synthesis-degradation	AT4G23720	transmembrane protein%2C putative (DUF1191)	2.6	0.022	Up
17	17.4.1	hormone metabolism.cytokinin.synthesis-degradation	AT5G19040	isopentenyltransferase 5	-1.2	0.011	Down
17	17.4.1	hormone metabolism.cytokinin.synthesis-degradation	AT5G59580	UDP-glucosyl transferase 76E1	7	0.042	Up
17	17.4.2	hormone metabolism.cytokinin.signal transduction	AT1G11160	Transducin/WD40 repeat-like superfamily protein	1.4	0.034	Up
17	17.4.2	hormone metabolism.cytokinin.signal transduction	AT1G59940	response regulator 3	8.5	0.013	Up
17	17.4.2	hormone metabolism.cytokinin.signal transduction	AT2G32380	Transmembrane protein 97%2C Putative	1.2	0.042	Up
17	17.4.2	hormone metabolism.cytokinin.signal transduction	AT3G16860	COBRA-like protein 8 precursor	-1.8	0.0031	Down
17	17.4.2	hormone metabolism.cytokinin.signal transduction	AT3G29350	histidine-containing phosphotransmitter 2	-1.2	4.7e-09	Down
17	17.5.1	hormone metabolism.ethylene.synthesis-degradation	AT1G17020	senescence-related gene 1	-1.2	0.00083	Down
17	17.5.1	hormone metabolism.ethylene.synthesis-degradation	AT1G21240	wall associated kinase 3	-1.8	1.6e-07	Down
17	17.5.1	hormone metabolism.ethylene.synthesis-degradation	AT1G47990	gibberellin 2-oxidase 4	2.9	0.0061	Up
17	17.5.1	hormone metabolism.ethylene.synthesis-degradation	AT1G80340	gibberellin 3-oxidase 2	-2.1	0.013	Down
17	17.5.1	hormone metabolism.ethylene.synthesis-degradation	AT3G11180	2-oxoglutarate (2OG) and Fe(II)-dependent oxygenase superfamily protein	1.6	0.019	Up
17	17.5.1	hormone metabolism.ethylene.synthesis-degradation	AT3G46490	2-oxoglutarate (2OG) and Fe(II)-dependent oxygenase superfamily protein	10	0.0061	Up
17	17.5.1	hormone metabolism.ethylene.synthesis-degradation	AT4G22880	leucoanthocyanidin dioxygenase	-1.1	0.048	Down
17	17.5.1	hormone metabolism.ethylene.synthesis-degradation	AT4G25420	2-oxoglutarate (2OG) and Fe(II)-dependent oxygenase superfamily protein	1.8	8.4e-06	Up
17	17.5.1.1	hormone metabolism.ethylene.synthesis-degradation.1-aminocyclopropane-1-carboxylate synthase	AT4G08040	1-aminocyclopropane-1-carboxylate synthase 11	5.9	0.0073	Up
17	17.5.1.1	hormone metabolism.ethylene.synthesis-degradation.1-aminocyclopropane-1-carboxylate synthase	AT4G11280	1-aminocyclopropane-1-carboxylic acid (acc) synthase 6	-1.7	2.8e-06	Down
17	17.5.1.2	hormone metabolism.ethylene.synthesis-degradation.1-aminocyclopropane-1-carboxylate oxidase	AT1G06640	2-oxoglutarate (2OG) and Fe(II)-dependent oxygenase superfamily protein	1.5	3.3e-06	Up
17	17.5.1.2	hormone metabolism.ethylene.synthesis-degradation.1-aminocyclopropane-1-carboxylate oxidase	AT1G77700	Pathogenesis-related thaumatin superfamily protein	1.1	0.011	Up
17	17.5.1.2	hormone metabolism.ethylene.synthesis-degradation.1-aminocyclopropane-1-carboxylate oxidase	AT3G19000	2-oxoglutarate (2OG) and Fe(II)-dependent oxygenase superfamily protein	-1.2	0.0012	Down
17	17.5.2	hormone metabolism.ethylene.signal transduction	AT1G01250	Integrase-type DNA-binding superfamily protein	2.1	0.003	Up
17	17.5.2	hormone metabolism.ethylene.signal transduction	AT1G02730	cellulose synthase-like D5	1.7	0.001	Up
17	17.5.2	hormone metabolism.ethylene.signal transduction	AT1G06160	octadecanoid-responsive AP2/ERF 59	-1.4	0.047	Down
17	17.5.2	hormone metabolism.ethylene.signal transduction	AT1G19210	Integrase-type DNA-binding superfamily protein	-4.5	0.00011	Down
17	17.5.2	hormone metabolism.ethylene.signal transduction	AT1G28370	ERF domain protein 11	-2.8	3.5e-06	Down
17	17.5.2	hormone metabolism.ethylene.signal transduction	AT1G30570	hercules receptor kinase 2	2	5.4e-07	Up
17	17.5.2	hormone metabolism.ethylene.signal transduction	AT1G46768	related to AP2 1	-1	0.027	Down
17	17.5.2	hormone metabolism.ethylene.signal transduction	AT1G74930	Integrase-type DNA-binding superfamily protein	-3.9	5.4e-06	Down
17	17.5.2	hormone metabolism.ethylene.signal transduction	AT1G80690	PPPDE putative thiol peptidase family protein	1.4	0.011	Up
17	17.5.2	hormone metabolism.ethylene.signal transduction	AT2G22200	Integrase-type DNA-binding superfamily protein	-1.9	0.032	Down
17	17.5.2	hormone metabolism.ethylene.signal transduction	AT2G23340	DREB and EAR motif protein 3	1.4	4.2e-05	Up
17	17.5.2	hormone metabolism.ethylene.signal transduction	AT2G44840	ethylene-responsive element binding factor 13	-3	2.4e-09	Down
17	17.5.2	hormone metabolism.ethylene.signal transduction	AT2G46310	cytokinin response factor 5	-1.4	4.2e-06	Down
17	17.5.2	hormone metabolism.ethylene.signal transduction	AT3G15210	ethylene responsive element binding factor 4	-1	0.0021	Down
17	17.5.2	hormone metabolism.ethylene.signal transduction	AT3G50130	transmembrane protein%2C putative (DUF247)	2.6	0.036	Up
17	17.5.2	hormone metabolism.ethylene.signal transduction	AT3G61630	cytokinin response factor 6	-1	7.4e-05	Down
17	17.5.2	hormone metabolism.ethylene.signal transduction	AT4G17490	ethylene responsive element binding factor 6	-3.5	2.5e-13	Down
17	17.5.2	hormone metabolism.ethylene.signal transduction	AT4G17500	ethylene responsive element binding factor 1	-2.7	1.8e-07	Down
17	17.5.2	hormone metabolism.ethylene.signal transduction	AT4G25490	C-repeat/DRE binding factor 1	-1.7	0.043	Down
17	17.5.2	hormone metabolism.ethylene.signal transduction	AT4G27950	cytokinin response factor 4	-1.7	1.2e-09	Down
17	17.5.2	hormone metabolism.ethylene.signal transduction	AT4G34410	redox responsive transcription factor 1	-4.2	0.0015	Down
17	17.5.2	hormone metabolism.ethylene.signal transduction	AT4G39780	Integrase-type DNA-binding superfamily protein	-1.8	0.00013	Down
17	17.5.2	hormone metabolism.ethylene.signal transduction	AT5G21960	Integrase-type DNA-binding superfamily protein	-3.4	0.007	Down
17	17.5.2	hormone metabolism.ethylene.signal transduction	AT5G25190	Integrase-type DNA-binding superfamily protein	2.5	0.0011	Up
17	17.5.2	hormone metabolism.ethylene.signal transduction	AT5G25390	Integrase-type DNA-binding superfamily protein	2.2	0.0011	Up
17	17.5.2	hormone metabolism.ethylene.signal transduction	AT5G44210	erf domain protein 9	1.5	0.001	Up
17	17.5.2	hormone metabolism.ethylene.signal transduction	AT5G47220	ethylene responsive element binding factor 2	-2.4	0.0027	Down
17	17.5.2	hormone metabolism.ethylene.signal transduction	AT5G47230	ethylene responsive element binding factor 5	-2.3	2.2e-06	Down
17	17.5.2	hormone metabolism.ethylene.signal transduction	AT5G51190	Integrase-type DNA-binding superfamily protein	-2.6	2.8e-15	Down
17	17.5.2	hormone metabolism.ethylene.signal transduction	AT5G51990	C-repeat-binding factor 4	-1.9	0.037	Down
17	17.5.2	hormone metabolism.ethylene.signal transduction	AT5G52020	Integrase-type DNA-binding superfamily protein	-2.8	0.0049	Down
17	17.5.2	hormone metabolism.ethylene.signal transduction	AT5G53290	cytokinin response factor 3	-2.7	7.2e-06	Down
17	17.5.2	hormone metabolism.ethylene.signal transduction	AT5G61590	Integrase-type DNA-binding superfamily protein	-1.6	0.00083	Down
17	17.5.2	hormone metabolism.ethylene.signal transduction	AT5G61600	ethylene response factor 104	-2.9	7.5e-10	Down
17	17.5.3	hormone metabolism.ethylene.induced-regulated-responsive-activated	AT1G09740	Adenine nucleotide alpha hydrolases-like superfamily protein	-2.1	4.7e-07	Down
17	17.5.3	hormone metabolism.ethylene.induced-regulated-responsive-activated	AT1G35180	TRAM%2C LAG1 and CLN8 (TLC) lipid-sensing domain containing protein	3.9	0.0031	Up
17	17.5.3	hormone metabolism.ethylene.induced-regulated-responsive-activated	AT1G45010	TRAM%2C LAG1 and CLN8 (TLC) lipid-sensing domain containing protein	2.3	8.4e-09	Up
17	17.5.3	hormone metabolism.ethylene.induced-regulated-responsive-activated	AT2G23560	methyl esterase 7	3.5	0.0056	Up
17	17.5.3	hormone metabolism.ethylene.induced-regulated-responsive-activated	AT2G23590	methyl esterase 8	1.2	0.0051	Up
17	17.5.3	hormone metabolism.ethylene.induced-regulated-responsive-activated	AT2G23620	methyl esterase 1	1.3	0.008	Up
17	17.5.3	hormone metabolism.ethylene.induced-regulated-responsive-activated	AT2G31730	basic helix-loop-helix (bHLH) DNA-binding superfamily protein	1.6	0.03	Up
17	17.5.3	hormone metabolism.ethylene.induced-regulated-responsive-activated	AT3G28690	Protein kinase superfamily protein	-1.4	0.00018	Down
17	17.5.3	hormone metabolism.ethylene.induced-regulated-responsive-activated	AT4G37150	methyl esterase 9	-1.7	0.00069	Down
17	17.5.3	hormone metabolism.ethylene.induced-regulated-responsive-activated	AT5G44350	ethylene-responsive nuclear protein-like protein	-1.3	0.0073	Down
17	17.6.1	hormone metabolism.gibberelin.synthesis-degradation	AT1G80320	2-oxoglutarate (2OG) and Fe(II)-dependent oxygenase superfamily protein	-1.7	0.00059	Down
17	17.6.1	hormone metabolism.gibberelin.synthesis-degradation	AT3G46480	2-oxoglutarate (2OG) and Fe(II)-dependent oxygenase superfamily protein	1.7	0.00082	Up
17	17.6.1	hormone metabolism.gibberelin.synthesis-degradation	AT5G54240	membrane lipoprotein lipid attachment site-like protein%2C putative (DUF1223)	1.3	9e-05	Up
17	17.6.1.11	hormone metabolism.gibberelin.synthesis-degradation.GA20 oxidase	AT1G80340	gibberellin 3-oxidase 2	-2.1	0.013	Down
17	17.6.1.11	hormone metabolism.gibberelin.synthesis-degradation.GA20 oxidase	AT4G25420	2-oxoglutarate (2OG) and Fe(II)-dependent oxygenase superfamily protein	1.8	8.4e-06	Up
17	17.6.1.12	hormone metabolism.gibberelin.synthesis-degradation.GA3 oxidase	AT1G80340	gibberellin 3-oxidase 2	-2.1	0.013	Down
17	17.6.1.13	hormone metabolism.gibberelin.synthesis-degradation.GA2 oxidase	AT1G47990	gibberellin 2-oxidase 4	2.9	0.0061	Up
17	17.6.2	hormone metabolism.gibberelin.signal transduction	AT2G14900	Gibberellin-regulated family protein	4.9	0.0044	Up
17	17.6.3	hormone metabolism.gibberelin.induced-regulated-responsive-activated	AT2G01070	Lung seven transmembrane receptor family protein	1.1	0.00022	Up
17	17.6.3	hormone metabolism.gibberelin.induced-regulated-responsive-activated	AT2G14900	Gibberellin-regulated family protein	4.9	0.0044	Up
17	17.6.3	hormone metabolism.gibberelin.induced-regulated-responsive-activated	AT3G10185	Gibberellin-regulated family protein	1.6	0.02	Up
17	17.6.3	hormone metabolism.gibberelin.induced-regulated-responsive-activated	AT3G55560	AT-hook protein of GA feedback 2	-1.1	0.018	Down
17	17.6.3	hormone metabolism.gibberelin.induced-regulated-responsive-activated	AT5G15230	GAST1 protein homolog 4	5	0.00016	Up
17	17.7.1	hormone metabolism.jasmonate.synthesis-degradation	AT1G12260	NAC 007	1.4	0.0005	Up
17	17.7.1	hormone metabolism.jasmonate.synthesis-degradation	AT1G32770	NAC domain containing protein 12	1.4	4.9e-07	Up
17	17.7.1	hormone metabolism.jasmonate.synthesis-degradation	AT1G62700	NAC (No apical meristem) domain transcriptional regulator superfamily protein	1.6	3.5e-05	Up
17	17.7.1	hormone metabolism.jasmonate.synthesis-degradation	AT1G71930	vascular related NAC-domain protein 7	2	0.02	Up
17	17.7.1	hormone metabolism.jasmonate.synthesis-degradation	AT3G17730	NAC domain containing protein 57	1.3	0.0046	Up
17	17.7.1	hormone metabolism.jasmonate.synthesis-degradation	AT3G61910	NAC domain protein 66	1.4	0.002	Up
17	17.7.1	hormone metabolism.jasmonate.synthesis-degradation	AT4G17980	NAC domain containing protein 71	7.6	0.02	Up
17	17.7.1	hormone metabolism.jasmonate.synthesis-degradation	AT5G46590	NAC domain containing protein 96	1.8	0.028	Up
17	17.7.1.1	hormone metabolism.jasmonate.synthesis-degradation.lipases	AT4G18550	alpha/beta-Hydrolases superfamily protein	1.1	1.3e-07	Up
17	17.7.1.2	hormone metabolism.jasmonate.synthesis-degradation.lipoxygenase	AT3G22400	PLAT/LH2 domain-containing lipoxygenase family protein	1.6	0.00016	Up
17	17.7.1.3	hormone metabolism.jasmonate.synthesis-degradation.allene oxidase synthase	AT5G42650	allene oxide synthase	-1.5	0.00035	Down
17	17.7.1.5	hormone metabolism.jasmonate.synthesis-degradation.12-oxophytodienoate reductase 3	AT2G35030	Pentatricopeptide repeat (PPR) superfamily protein	-1	0.0031	Down
17	17.7.1.5	hormone metabolism.jasmonate.synthesis-degradation.12-oxophytodienoate reductase 3	AT2G41330	Glutaredoxin family protein	1.2	0.00067	Up
17	17.7.1.5	hormone metabolism.jasmonate.synthesis-degradation.12-oxophytodienoate reductase 3	AT4G10630	Glutaredoxin family protein	1.9	0.007	Up
17	17.7.1.5	hormone metabolism.jasmonate.synthesis-degradation.12-oxophytodienoate reductase 3	AT5G06470	Glutaredoxin family protein	1.5	0.042	Up
17	17.7.2	hormone metabolism.jasmonate.signal transduction	AT1G17380	jasmonate-zim-domain protein 5	-1.9	0.042	Down
17	17.7.2	hormone metabolism.jasmonate.signal transduction	AT1G19180	jasmonate-zim-domain protein 1	-1.8	0.0031	Down
17	17.7.3	hormone metabolism.jasmonate.induced-regulated-responsive-activated	AT1G54040	epithiospecifier protein	1.6	0.01	Up
17	17.7.3	hormone metabolism.jasmonate.induced-regulated-responsive-activated	AT1G58160	jacalin lectin-like protein	1.1	0.023	Up
17	17.7.3	hormone metabolism.jasmonate.induced-regulated-responsive-activated	AT3G16470	Mannose-binding lectin superfamily protein	1.7	0.0012	Up
17	17.7.3	hormone metabolism.jasmonate.induced-regulated-responsive-activated	AT5G49870	Mannose-binding lectin superfamily protein	2.6	0.012	Up
17	17.8.1	hormone metabolism.salicylic acid.synthesis-degradation	AT1G63080	Pentatricopeptide repeat (PPR) superfamily protein	1.2	0.041	Up
17	17.8.1	hormone metabolism.salicylic acid.synthesis-degradation	AT1G66690	S-adenosyl-L-methionine-dependent methyltransferases superfamily protein	1.7	0.0018	Up
17	17.8.1	hormone metabolism.salicylic acid.synthesis-degradation	AT1G66700	S-adenosyl-L-methionine-dependent methyltransferases superfamily protein	-4	0.0061	Down
17	17.8.1	hormone metabolism.salicylic acid.synthesis-degradation	AT2G23560	methyl esterase 7	3.5	0.0056	Up
17	17.8.1	hormone metabolism.salicylic acid.synthesis-degradation	AT2G23590	methyl esterase 8	1.2	0.0051	Up
17	17.8.1	hormone metabolism.salicylic acid.synthesis-degradation	AT2G23620	methyl esterase 1	1.3	0.008	Up
17	17.8.1	hormone metabolism.salicylic acid.synthesis-degradation	AT2G30150	UDP-Glycosyltransferase superfamily protein	2.2	5e-06	Up
17	17.8.1	hormone metabolism.salicylic acid.synthesis-degradation	AT3G62730	desiccation-like protein	2	7.6e-10	Up
17	17.8.1	hormone metabolism.salicylic acid.synthesis-degradation	AT4G37150	methyl esterase 9	-1.7	0.00069	Down
17	17.8.1	hormone metabolism.salicylic acid.synthesis-degradation	AT5G65820	Pentatricopeptide repeat (PPR) superfamily protein	1.2	0.0068	Up
17	17.8.2	hormone metabolism.salicylic acid.signal transduction	AT2G23560	methyl esterase 7	3.5	0.0056	Up
17	17.8.2	hormone metabolism.salicylic acid.signal transduction	AT2G23590	methyl esterase 8	1.2	0.0051	Up
17	17.8.2	hormone metabolism.salicylic acid.signal transduction	AT2G23620	methyl esterase 1	1.3	0.008	Up
17	17.8.2	hormone metabolism.salicylic acid.signal transduction	AT4G37150	methyl esterase 9	-1.7	0.00069	Down
18	18	Co-factor and vitamine metabolism	AT1G37150	holocarboxylase synthetase 2	-1.6	0.00077	Down
18	18	Co-factor and vitamine metabolism	AT2G27740	RAB6-interacting golgin (DUF662)	1.6	0.0027	Up
18	18	Co-factor and vitamine metabolism	AT3G52900	RAB6-interacting golgin (DUF662)	1.5	1.7e-05	Up
18	18	Co-factor and vitamine metabolism	AT4G16740	terpene synthase 03	-1.2	0.023	Down
18	18	Co-factor and vitamine metabolism	AT4G27730	oligopeptide transporter 1	1.9	0.00065	Up
18	18	Co-factor and vitamine metabolism	AT5G16340	AMP-dependent synthetase and ligase family protein	1.1	0.033	Up
18	18	Co-factor and vitamine metabolism	AT5G41470	Nuclear transport factor 2 (NTF2) family protein	1.3	0.044	Up
18	18	Co-factor and vitamine metabolism	AT5G64410	oligopeptide transporter 4	1.3	0.0065	Up
18	18.2.1	Co-factor and vitamine metabolism.thiamine.thiamine diphosphokinase	AT1G02880	thiamin pyrophosphokinase1	-1.6	8.4e-07	Down
18	18.4.5	Co-factor and vitamine metabolism.pantothenate.pantothenate kinase (PANK)	AT2G17300	hypothetical protein	1.1	0.0031	Up
18	18.4.5	Co-factor and vitamine metabolism.pantothenate.pantothenate kinase (PANK)	AT4G35320	hypothetical protein	1.4	0.00039	Up
18	18.6	Co-factor and vitamine metabolism.biotin	AT2G31955	cofactor of nitrate reductase and xanthine dehydrogenase 2	-1.1	2.4e-05	Down
18	18.6	Co-factor and vitamine metabolism.biotin	AT5G15530	biotin carboxyl carrier protein 2	1.9	0.01	Up
19	19.1	tetrapyrrole synthesis.glu-tRNA synthetase	AT1G27730	salt tolerance zinc finger	-2.6	4.5e-07	Down
19	19.1	tetrapyrrole synthesis.glu-tRNA synthetase	AT3G19580	zinc-finger protein 2	-2.1	7.1e-08	Down
19	19.1	tetrapyrrole synthesis.glu-tRNA synthetase	AT5G04340	6	-2.3	6e-05	Down
19	19.1	tetrapyrrole synthesis.glu-tRNA synthetase	AT5G43170	zinc-finger protein 3	-1.9	4.7e-05	Down
19	19.2	tetrapyrrole synthesis.glu-tRNA reductase	AT1G27440	Exostosin family protein	1.4	0.0019	Up
19	19.3	tetrapyrrole synthesis.GSA	AT1G12600	UDP-N-acetylglucosamine (UAA) transporter family	1.5	0.046	Up
19	19.3	tetrapyrrole synthesis.GSA	AT1G56130	Leucine-rich repeat transmembrane protein kinase	-1.2	0.0038	Down
19	19.3	tetrapyrrole synthesis.GSA	AT2G36895	D-tagatose-1%2C6-bisphosphate aldolase subunit	1	4.8e-06	Up
19	19.3	tetrapyrrole synthesis.GSA	AT4G31870	glutathione peroxidase 7	-1.1	2.8e-06	Down
19	19.3	tetrapyrrole synthesis.GSA	AT5G40310	Exonuclease family protein	-6.6	0.0012	Down
19	19.3	tetrapyrrole synthesis.GSA	AT5G59020	hepatocyte growth factor activator%2C putative (DUF3527)	1.2	9e-05	Up
19	19.4	tetrapyrrole synthesis.ALA dehydratase	AT1G11160	Transducin/WD40 repeat-like superfamily protein	1.4	0.034	Up
19	19.4	tetrapyrrole synthesis.ALA dehydratase	AT1G19170	Pectin lyase-like superfamily protein	1.3	0.00067	Up
19	19.4	tetrapyrrole synthesis.ALA dehydratase	AT1G53040	tRNA (met) cytidine acetyltransferase%2C putative (DUF616)	1.2	0.0033	Up
19	19.4	tetrapyrrole synthesis.ALA dehydratase	AT2G34300	S-adenosyl-L-methionine-dependent methyltransferases superfamily protein	1.1	0.0038	Up
19	19.4	tetrapyrrole synthesis.ALA dehydratase	AT3G01710	TPX2 (targeting protein for Xklp2) protein family	2.2	0.0018	Up
19	19.4	tetrapyrrole synthesis.ALA dehydratase	AT3G26050	TPX2 (targeting protein for Xklp2) protein family	-1.6	0.0066	Down
19	19.4	tetrapyrrole synthesis.ALA dehydratase	AT3G42950	Pectin lyase-like superfamily protein	1	0.0024	Up
19	19.4	tetrapyrrole synthesis.ALA dehydratase	AT3G47950	H[+]-ATPase 4	-1.5	0.005	Down
19	19.4	tetrapyrrole synthesis.ALA dehydratase	AT4G23790	TRICHOME BIREFRINGENCE-LIKE 24	1.6	8.4e-06	Up
19	19.4	tetrapyrrole synthesis.ALA dehydratase	AT5G50370	Adenylate kinase family protein	1.5	7.1e-08	Up
19	19.4	tetrapyrrole synthesis.ALA dehydratase	AT5G50420	O-fucosyltransferase family protein	1.2	3.6e-05	Up
19	19.4	tetrapyrrole synthesis.ALA dehydratase	AT5G62670	H[+]-ATPase 11	1.2	2.3e-05	Up
19	19.8	tetrapyrrole synthesis.coproporphyrinogen III oxidase	AT4G03205	Coproporphyrinogen III oxidase	1.2	0.0006	Up
19	19.1	tetrapyrrole synthesis.magnesium chelatase	AT5G13630	magnesium-chelatase subunit chlH%2C chloroplast%2C putative / Mg-protoporphyrin IX chelatase%2C putative (CHLH)	1.1	0.00021	Up
19	19.14	tetrapyrrole synthesis.protochlorophyllide reductase	AT4G27440	protochlorophyllide oxidoreductase B	1	0.011	Up
19	19.2	tetrapyrrole synthesis.ferrochelatase	AT5G26030	ferrochelatase 1	-1.1	0.00031	Down
19	19.3	tetrapyrrole synthesis.urogen III methylase	AT5G40850	urophorphyrin methylase 1	-2	1.9e-05	Down
19	19.4	tetrapyrrole synthesis.regulation	AT3G59400	protein GENOMES UNCOUPLED 4	1.6	7.4e-05	Up
20	20	stress	AT1G27730	salt tolerance zinc finger	-2.6	4.5e-07	Down
20	20	stress	AT2G16750	kinase with adenine nucleotide alpha hydrolases-like domain-containing protein	2.3	0.0073	Up
20	20	stress	AT3G02250	O-fucosyltransferase family protein	1.4	2.1e-06	Up
20	20	stress	AT3G19580	zinc-finger protein 2	-2.1	7.1e-08	Down
20	20	stress	AT3G21210	zinc ion binding protein	1.1	0.025	Up
20	20	stress	AT4G16015	Cysteine/Histidine-rich C1 domain family protein	1.5	0.037	Up
20	20	stress	AT4G35030	Protein kinase superfamily protein	2.5	2.1e-06	Up
20	20	stress	AT5G01480	Cysteine/Histidine-rich C1 domain family protein	1.3	0.041	Up
20	20	stress	AT5G04340	6	-2.3	6e-05	Down
20	20	stress	AT5G15740	O-fucosyltransferase family protein	1.7	7.8e-05	Up
20	20	stress	AT5G26190	Cysteine/Histidine-rich C1 domain family protein	2.1	0.045	Up
20	20	stress	AT5G43170	zinc-finger protein 3	-1.9	4.7e-05	Down
20	20.1	stress.biotic	AT1G03820	E6-like protein	2.4	3.8e-05	Up
20	20.1	stress.biotic	AT1G09200	Histone superfamily protein	1.8	0.0067	Up
20	20.1	stress.biotic	AT1G23130	Polyketide cyclase/dehydrase and lipid transport superfamily protein	-1.9	0.0073	Down
20	20.1	stress.biotic	AT1G49750	Leucine-rich repeat (LRR) family protein	1.8	0.00054	Up
20	20.1	stress.biotic	AT1G65690	Late embryogenesis abundant (LEA) hydroxyproline-rich glycoprotein family	-1.7	9.2e-07	Down
20	20.1	stress.biotic	AT1G65710	serine/arginine repetitive matrix-like protein	2	0.019	Up
20	20.1	stress.biotic	AT1G70890	MLP-like protein 43	1.1	0.018	Up
20	20.1	stress.biotic	AT2G15300	Leucine-rich repeat protein kinase family protein	3.1	0.0023	Up
20	20.1	stress.biotic	AT2G19970	CAP (Cysteine-rich secretory proteins%2C Antigen 5%2C and Pathogenesis-related 1 protein) superfamily protein	3.5	0.0015	Up
20	20.1	stress.biotic	AT2G23300	Leucine-rich repeat protein kinase family protein	1.3	6.8e-06	Up
20	20.1	stress.biotic	AT2G23690	HTH-type transcriptional regulator	2.6	3.1e-05	Up
20	20.1	stress.biotic	AT2G28790	Pathogenesis-related thaumatin superfamily protein	1.8	0.00025	Up
20	20.1	stress.biotic	AT2G42900	Plant basic secretory protein (BSP) family protein	2.4	0.023	Up
20	20.1	stress.biotic	AT3G02840	ARM repeat superfamily protein	-3.6	3.6e-05	Down
20	20.1	stress.biotic	AT3G18260	Reticulon family protein	1.7	4.4e-06	Up
20	20.1	stress.biotic	AT3G44220	Late embryogenesis abundant (LEA) hydroxyproline-rich glycoprotein family	2.2	7.6e-08	Up
20	20.1	stress.biotic	AT3G48720	HXXXD-type acyl-transferase family protein	1	4.8e-05	Up
20	20.1	stress.biotic	AT3G63110	isopentenyltransferase 3	-1.7	7.6e-05	Down
20	20.1	stress.biotic	AT4G01410	Late embryogenesis abundant (LEA) hydroxyproline-rich glycoprotein family	1.5	6.3e-05	Up
20	20.1	stress.biotic	AT4G01895	systemic acquired resistance (SAR) regulator protein NIMIN-1-like protein	1.7	0.048	Up
20	20.1	stress.biotic	AT4G09950	P-loop containing nucleoside triphosphate hydrolases superfamily protein	1.3	1.3e-06	Up
20	20.1	stress.biotic	AT4G23720	transmembrane protein%2C putative (DUF1191)	2.6	0.022	Up
20	20.1	stress.biotic	AT4G34220	Leucine-rich repeat protein kinase family protein	1.5	0.012	Up
20	20.1	stress.biotic	AT5G10390	Histone superfamily protein	1.5	0.0017	Up
20	20.1	stress.biotic	AT5G10400	Histone superfamily protein	1.3	0.015	Up
20	20.1	stress.biotic	AT5G19040	isopentenyltransferase 5	-1.2	0.011	Down
20	20.1	stress.biotic	AT5G22200	Late embryogenesis abundant (LEA) hydroxyproline-rich glycoprotein family	1.3	0.011	Up
20	20.1	stress.biotic	AT5G22870	Late embryogenesis abundant (LEA) hydroxyproline-rich glycoprotein family	1.3	0.04	Up
20	20.1	stress.biotic	AT5G37010	rho GTPase-activating protein	1.4	0.0021	Up
20	20.1	stress.biotic	AT5G66330	Leucine-rich repeat (LRR) family protein	2.7	0.0013	Up
20	20.1.1	stress.biotic.respiratory burst	AT5G47910	respiratory burst oxidase homologue D	-1.3	0.0003	Down
20	20.1.2	stress.biotic.receptors	AT1G15060	alpha/beta hydrolase family protein	-1	1.6e-09	Down
20	20.1.2	stress.biotic.receptors	AT1G33600	Leucine-rich repeat (LRR) family protein	-1.1	0.00098	Down
20	20.1.2	stress.biotic.receptors	AT1G47890	receptor like protein 7	-2.6	1.5e-07	Down
20	20.1.2	stress.biotic.receptors	AT1G57630	Toll-Interleukin-Resistance (TIR) domain family protein	-3	0.0045	Down
20	20.1.2	stress.biotic.receptors	AT1G58170	Disease resistance-responsive (dirigent-like protein) family protein	1.4	5.7e-08	Up
20	20.1.2	stress.biotic.receptors	AT1G65390	phloem protein 2 A5	-2.3	0.009	Down
20	20.1.2	stress.biotic.receptors	AT1G66090	Disease resistance protein (TIR-NBS class)	-2.6	4.5e-10	Down
20	20.1.2	stress.biotic.receptors	AT2G15080	receptor like protein 19	-1.1	0.00083	Down
20	20.1.2	stress.biotic.receptors	AT2G25440	receptor like protein 20	-2.2	0.00071	Down
20	20.1.2	stress.biotic.receptors	AT2G30150	UDP-Glycosyltransferase superfamily protein	2.2	5e-06	Up
20	20.1.2	stress.biotic.receptors	AT2G32140	transmembrane receptor	-1.9	0.0001	Down
20	20.1.2	stress.biotic.receptors	AT2G32680	receptor like protein 23	-2.1	0.00021	Down
20	20.1.2	stress.biotic.receptors	AT2G42800	receptor like protein 29	1.2	0.011	Up
20	20.1.2	stress.biotic.receptors	AT3G04210	Disease resistance protein (TIR-NBS class)	-1.9	6.7e-08	Down
20	20.1.2	stress.biotic.receptors	AT3G11010	receptor like protein 34	-1.3	0.0016	Down
20	20.1.2	stress.biotic.receptors	AT3G11080	receptor like protein 35	-1.5	0.0003	Down
20	20.1.2	stress.biotic.receptors	AT3G12610	Leucine-rich repeat (LRR) family protein	4	0.00036	Up
20	20.1.2	stress.biotic.receptors	AT3G13650	Disease resistance-responsive (dirigent-like protein) family protein	1.3	0.017	Up
20	20.1.2	stress.biotic.receptors	AT3G19660	hypothetical protein	-1.1	0.00015	Down
20	20.1.2	stress.biotic.receptors	AT3G20820	Leucine-rich repeat (LRR) family protein	2.3	9e-06	Up
20	20.1.2	stress.biotic.receptors	AT3G27620	alternative oxidase 1C	-1.2	0.041	Down
20	20.1.2	stress.biotic.receptors	AT3G44610	Protein kinase superfamily protein	1.7	0.00064	Up
20	20.1.2	stress.biotic.receptors	AT4G13920	receptor like protein 50	-1.1	0.006	Down
20	20.1.2	stress.biotic.receptors	AT4G16860	Disease resistance protein (TIR-NBS-LRR class) family	-1.2	8.7e-09	Down
20	20.1.2	stress.biotic.receptors	AT4G16960	disease resistance protein (TIR-NBS-LRR class)	-1.1	4.5e-05	Down
20	20.1.2	stress.biotic.receptors	AT4G19050	NB-ARC domain-containing disease resistance protein	1.1	0.00046	Up
20	20.1.2	stress.biotic.receptors	AT4G23690	Disease resistance-responsive (dirigent-like protein) family protein	3.1	2.7e-07	Up
20	20.1.2	stress.biotic.receptors	AT5G04720	ADR1-like 2	-1.1	1.1e-06	Down
20	20.1.2	stress.biotic.receptors	AT5G19870	transmembrane epididymal protein (DUF716)	1.6	0.0083	Up
20	20.1.2	stress.biotic.receptors	AT5G23400	Leucine-rich repeat (LRR) family protein	2.4	9.1e-05	Up
20	20.1.2	stress.biotic.receptors	AT5G25910	receptor like protein 52	-1.3	0.024	Down
20	20.1.2	stress.biotic.receptors	AT5G41740	Disease resistance protein (TIR-NBS-LRR class) family	-2.5	6e-11	Down
20	20.1.2	stress.biotic.receptors	AT5G41750	Disease resistance protein (TIR-NBS-LRR class) family	-2.8	2.2e-08	Down
20	20.1.2	stress.biotic.receptors	AT5G47960	RAB GTPase homolog A4C	-1.9	2.6e-09	Down
20	20.1.2	stress.biotic.receptors	AT5G58120	Disease resistance protein (TIR-NBS-LRR class) family	-1	0.0017	Down
20	20.1.2.1	stress.biotic.receptors.CC-NBS-LRR	AT1G04520	plasmodesmata-located protein 2	1.9	0.019	Up
20	20.1.2.1	stress.biotic.receptors.CC-NBS-LRR	AT2G33330	plasmodesmata-located protein 3	2.7	7.7e-05	Up
20	20.1.2.2	stress.biotic.receptors.TIR-NBS-LRR	AT1G72900	Toll-Interleukin-Resistance (TIR) domain-containing protein	-2.3	4.5e-10	Down
20	20.1.2.2	stress.biotic.receptors.TIR-NBS-LRR	AT1G72910	Toll-Interleukin-Resistance (TIR) domain-containing protein	-2.3	5.5e-13	Down
20	20.1.2.2	stress.biotic.receptors.TIR-NBS-LRR	AT1G72920	Toll-Interleukin-Resistance (TIR) domain family protein	-2.5	1.1e-28	Down
20	20.1.2.2	stress.biotic.receptors.TIR-NBS-LRR	AT1G72940	Toll-Interleukin-Resistance (TIR) domain-containing protein	-2.9	1.2e-16	Down
20	20.1.3	stress.biotic.signalling	AT1G17380	jasmonate-zim-domain protein 5	-1.9	0.042	Down
20	20.1.3	stress.biotic.signalling	AT1G19180	jasmonate-zim-domain protein 1	-1.8	0.0031	Down
20	20.1.3	stress.biotic.signalling	AT1G21326	VQ motif-containing protein	-3.7	3.8e-09	Down
20	20.1.3	stress.biotic.signalling	AT1G76650	calmodulin-like 38	-2.5	2.1e-05	Down
20	20.1.3	stress.biotic.signalling	AT3G18690	MAP kinase substrate 1	-1.7	5.7e-10	Down
20	20.1.3	stress.biotic.signalling	AT3G52430	alpha/beta-Hydrolases superfamily protein	-1.2	0.00016	Down
20	20.1.3	stress.biotic.signalling	AT5G09976	hypothetical protein	2.3	0.024	Up
20	20.1.3	stress.biotic.signalling	AT5G42380	calmodulin like 37	-4.1	8.1e-09	Down
20	20.1.3	stress.biotic.signalling	AT5G64900	precursor of peptide 1	1.5	0.016	Up
20	20.1.3.1	stress.biotic.signalling.MLO-like	AT4G24250	Seven transmembrane MLO family protein	1.6	0.0028	Up
20	20.1.3.1	stress.biotic.signalling.MLO-like	AT5G65970	Seven transmembrane MLO family protein	-1.3	0.019	Down
20	20.1.5	stress.biotic.regulation of transcription	AT1G04280	P-loop containing nucleoside triphosphate hydrolases superfamily protein	-1.3	0.0064	Down
20	20.1.5	stress.biotic.regulation of transcription	AT1G28370	ERF domain protein 11	-2.8	3.5e-06	Down
20	20.1.5	stress.biotic.regulation of transcription	AT1G32640	Basic helix-loop-helix (bHLH) DNA-binding family protein	-1.8	0.00036	Down
20	20.1.5	stress.biotic.regulation of transcription	AT1G65920	Regulator of chromosome condensation (RCC1) family with FYVE zinc finger domain-containing protein	1.3	0.0031	Up
20	20.1.5	stress.biotic.regulation of transcription	AT1G80840	WRKY DNA-binding protein 40	-3.4	0.0023	Down
20	20.1.5	stress.biotic.regulation of transcription	AT2G46400	WRKY DNA-binding protein 46	-1.9	2.3e-05	Down
20	20.1.5	stress.biotic.regulation of transcription	AT3G15150	RING/U-box superfamily protein	-1.1	0.0096	Down
20	20.1.5	stress.biotic.regulation of transcription	AT3G15210	ethylene responsive element binding factor 4	-1	0.0021	Down
20	20.1.5	stress.biotic.regulation of transcription	AT4G17490	ethylene responsive element binding factor 6	-3.5	2.5e-13	Down
20	20.1.5	stress.biotic.regulation of transcription	AT4G17500	ethylene responsive element binding factor 1	-2.7	1.8e-07	Down
20	20.1.5	stress.biotic.regulation of transcription	AT4G23810	WRKY family transcription factor	-2.6	0.0043	Down
20	20.1.5	stress.biotic.regulation of transcription	AT5G24110	WRKY DNA-binding protein 30	-2	0.0084	Down
20	20.1.5	stress.biotic.regulation of transcription	AT5G25190	Integrase-type DNA-binding superfamily protein	2.5	0.0011	Up
20	20.1.5	stress.biotic.regulation of transcription	AT5G25390	Integrase-type DNA-binding superfamily protein	2.2	0.0011	Up
20	20.1.5	stress.biotic.regulation of transcription	AT5G44210	erf domain protein 9	1.5	0.001	Up
20	20.1.5	stress.biotic.regulation of transcription	AT5G47220	ethylene responsive element binding factor 2	-2.4	0.0027	Down
20	20.1.5	stress.biotic.regulation of transcription	AT5G47230	ethylene responsive element binding factor 5	-2.3	2.2e-06	Down
20	20.1.5	stress.biotic.regulation of transcription	AT5G51190	Integrase-type DNA-binding superfamily protein	-2.6	2.8e-15	Down
20	20.1.5	stress.biotic.regulation of transcription	AT5G61600	ethylene response factor 104	-2.9	7.5e-10	Down
20	20.1.6	stress.biotic.heat shock proteins	AT4G12400	stress-inducible protein	1.2	0.003	Up
20	20.1.6	stress.biotic.heat shock proteins	AT4G31890	ARM repeat superfamily protein	2.2	0.039	Up
20	20.1.6	stress.biotic.heat shock proteins	AT5G04160	Nucleotide-sugar transporter family protein	1.2	5.4e-05	Up
20	20.1.7	stress.biotic.PR-proteins	AT1G15060	alpha/beta hydrolase family protein	-1	1.6e-09	Down
20	20.1.7	stress.biotic.PR-proteins	AT1G18250	Pathogenesis-related thaumatin superfamily protein	2	0.00065	Up
20	20.1.7	stress.biotic.PR-proteins	AT1G18835	mini zinc finger	1.9	0.0073	Up
20	20.1.7	stress.biotic.PR-proteins	AT1G47890	receptor like protein 7	-2.6	1.5e-07	Down
20	20.1.7	stress.biotic.PR-proteins	AT1G65920	Regulator of chromosome condensation (RCC1) family with FYVE zinc finger domain-containing protein	1.3	0.0031	Up
20	20.1.7	stress.biotic.PR-proteins	AT1G75030	thaumatin-like protein 3	2.2	0.039	Up
20	20.1.7	stress.biotic.PR-proteins	AT1G77700	Pathogenesis-related thaumatin superfamily protein	1.1	0.011	Up
20	20.1.7	stress.biotic.PR-proteins	AT2G15080	receptor like protein 19	-1.1	0.00083	Down
20	20.1.7	stress.biotic.PR-proteins	AT2G17550	RB1-inducible coiled-coil protein	1.2	1.2e-05	Up
20	20.1.7	stress.biotic.PR-proteins	AT2G21770	cellulose synthase A9	1.2	0.0012	Up
20	20.1.7	stress.biotic.PR-proteins	AT2G22190	Haloacid dehalogenase-like hydrolase (HAD) superfamily protein	-1	0.036	Down
20	20.1.7	stress.biotic.PR-proteins	AT2G25440	receptor like protein 20	-2.2	0.00071	Down
20	20.1.7	stress.biotic.PR-proteins	AT2G27660	Cysteine/Histidine-rich C1 domain family protein	-2.2	3.5e-05	Down
20	20.1.7	stress.biotic.PR-proteins	AT2G32680	receptor like protein 23	-2.1	0.00021	Down
20	20.1.7	stress.biotic.PR-proteins	AT3G11010	receptor like protein 34	-1.3	0.0016	Down
20	20.1.7	stress.biotic.PR-proteins	AT3G11080	receptor like protein 35	-1.5	0.0003	Down
20	20.1.7	stress.biotic.PR-proteins	AT3G28917	mini zinc finger 2	2	0.013	Up
20	20.1.7	stress.biotic.PR-proteins	AT3G49670	Leucine-rich receptor-like protein kinase family protein	1.5	0.00075	Up
20	20.1.7	stress.biotic.PR-proteins	AT4G13920	receptor like protein 50	-1.1	0.006	Down
20	20.1.7	stress.biotic.PR-proteins	AT4G16950	Disease resistance protein (TIR-NBS-LRR class) family	-1.1	6e-11	Down
20	20.1.7	stress.biotic.PR-proteins	AT4G18780	cellulose synthase family protein	1.6	0.00052	Up
20	20.1.7	stress.biotic.PR-proteins	AT4G24180	THAUMATIN-LIKE PROTEIN 1	1.4	0.028	Up
20	20.1.7	stress.biotic.PR-proteins	AT4G24660	homeobox protein 22	-1.2	0.0003	Down
20	20.1.7	stress.biotic.PR-proteins	AT4G29780	nuclease	-3.4	2.7e-12	Down
20	20.1.7	stress.biotic.PR-proteins	AT4G31470	CAP (Cysteine-rich secretory proteins%2C Antigen 5%2C and Pathogenesis-related 1 protein) superfamily protein	8.3	0.015	Up
20	20.1.7	stress.biotic.PR-proteins	AT4G36010	Pathogenesis-related thaumatin superfamily protein	-1.7	5e-06	Down
20	20.1.7	stress.biotic.PR-proteins	AT4G38660	Pathogenesis-related thaumatin superfamily protein	1.4	0.001	Up
20	20.1.7	stress.biotic.PR-proteins	AT4G39350	cellulose synthase A2	1.5	1.1e-07	Up
20	20.1.7	stress.biotic.PR-proteins	AT5G02140	Pathogenesis-related thaumatin superfamily protein	2.1	0.02	Up
20	20.1.7	stress.biotic.PR-proteins	AT5G17880	disease resistance protein (TIR-NBS-LRR class)	-1.2	8.4e-21	Down
20	20.1.7	stress.biotic.PR-proteins	AT5G18350	Disease resistance protein (TIR-NBS-LRR class) family	6.9	0.026	Up
20	20.1.7	stress.biotic.PR-proteins	AT5G24210	alpha/beta-Hydrolases superfamily protein	-1.9	4.8e-06	Down
20	20.1.7	stress.biotic.PR-proteins	AT5G25910	receptor like protein 52	-1.3	0.024	Down
20	20.1.7	stress.biotic.PR-proteins	AT5G40020	Pathogenesis-related thaumatin superfamily protein	1.9	8.4e-07	Up
20	20.1.7	stress.biotic.PR-proteins	AT5G44030	cellulose synthase A4	1.3	0.0053	Up
20	20.1.7.1	stress.biotic.PR-proteins.PR1 (antifungal)	AT2G14610	pathogenesis-related protein 1	-4.5	0.009	Down
20	20.1.7.3	stress.biotic.PR-proteins.PR3/4/8/11 (chitinases and chitin binding proteins)	AT1G73140	trichome birefringence-like protein (DUF828)	2.1	3.1e-05	Up
20	20.1.7.3	stress.biotic.PR-proteins.PR3/4/8/11 (chitinases and chitin binding proteins)	AT2G38320	TRICHOME BIREFRINGENCE-LIKE 34	2.7	3.2e-06	Up
20	20.1.7.3	stress.biotic.PR-proteins.PR3/4/8/11 (chitinases and chitin binding proteins)	AT2G43580	Chitinase family protein	-1.2	0.028	Down
20	20.1.7.3	stress.biotic.PR-proteins.PR3/4/8/11 (chitinases and chitin binding proteins)	AT2G43620	Chitinase family protein	4.2	0.018	Up
20	20.1.7.3	stress.biotic.PR-proteins.PR3/4/8/11 (chitinases and chitin binding proteins)	AT3G16920	chitinase-like protein	1.3	0.0017	Up
20	20.1.7.3	stress.biotic.PR-proteins.PR3/4/8/11 (chitinases and chitin binding proteins)	AT3G47540	Chitinase family protein	1.5	0.012	Up
20	20.1.7.3	stress.biotic.PR-proteins.PR3/4/8/11 (chitinases and chitin binding proteins)	AT3G55990	trichome birefringence-like protein (DUF828)	2	2.5e-05	Up
20	20.1.7.3	stress.biotic.PR-proteins.PR3/4/8/11 (chitinases and chitin binding proteins)	AT5G01360	trichome birefringence-like protein (DUF828)	2.4	1.7e-05	Up
20	20.1.7.3	stress.biotic.PR-proteins.PR3/4/8/11 (chitinases and chitin binding proteins)	AT5G24090	chitinase A	-1.8	0.0012	Down
20	20.1.7.6	stress.biotic.PR-proteins.PR6 (proteinase inhibitors)	AT2G03210	fucosyltransferase 2	3.1	0.049	Up
20	20.1.7.6	stress.biotic.PR-proteins.PR6 (proteinase inhibitors)	AT2G15390	fucosyltransferase 4	-2.9	5.7e-09	Down
20	20.1.7.6	stress.biotic.PR-proteins.PR6 (proteinase inhibitors)	AT2G38870	Serine protease inhibitor%2C potato inhibitor I-type family protein	2.8	0.0062	Up
20	20.1.7.6	stress.biotic.PR-proteins.PR6 (proteinase inhibitors)	AT5G47550	Cystatin/monellin superfamily protein	1.4	0.041	Up
20	20.1.7.6.1	stress.biotic.PR-proteins.PR6 (proteinase inhibitors).trypsin inhibitor	AT1G06340	Plant Tudor-like protein	3.2	0.02	Up
20	20.1.7.6.1	stress.biotic.PR-proteins.PR6 (proteinase inhibitors).trypsin inhibitor	AT1G72500	inter alpha-trypsin inhibitor%2C heavy chain-like protein	1.5	7.8e-08	Up
20	20.1.7.6.1	stress.biotic.PR-proteins.PR6 (proteinase inhibitors).trypsin inhibitor	AT2G43550	scorpion toxin-like knottin superfamily protein	1.4	0.02	Up
20	20.1.7.12	stress.biotic.PR-proteins.PR12 (plant defensins)	AT2G02100	low-molecular-weight cysteine-rich 69	1.2	0.048	Up
20	20.1.7.12	stress.biotic.PR-proteins.PR12 (plant defensins)	AT2G02130	low-molecular-weight cysteine-rich 68	2.1	5e-08	Up
20	20.1.7.12	stress.biotic.PR-proteins.PR12 (plant defensins)	AT3G04540	Cysteine-rich protein	2.9	0.0044	Up
20	20.1.7.12	stress.biotic.PR-proteins.PR12 (plant defensins)	AT5G42235	Expressed protein	4.5	4.8e-05	Up
20	20.1.99	stress.biotic.misc	AT1G05760	Mannose-binding lectin superfamily protein	1	0.001	Up
20	20.1.99	stress.biotic.misc	AT1G05770	Mannose-binding lectin superfamily protein	1.5	0.005	Up
20	20.1.99	stress.biotic.misc	AT1G35180	TRAM%2C LAG1 and CLN8 (TLC) lipid-sensing domain containing protein	3.9	0.0031	Up
20	20.1.99	stress.biotic.misc	AT1G45010	TRAM%2C LAG1 and CLN8 (TLC) lipid-sensing domain containing protein	2.3	8.4e-09	Up
20	20.1.99	stress.biotic.misc	AT1G52140	Avr9/Cf-9 rapidly elicited protein	1.3	3.6e-05	Up
20	20.1.99	stress.biotic.misc	AT2G29710	UDP-Glycosyltransferase superfamily protein	1.6	0.007	Up
20	20.1.99	stress.biotic.misc	AT2G40230	HXXXD-type acyl-transferase family protein	1.6	4e-07	Up
20	20.1.99	stress.biotic.misc	AT3G03480	acetyl CoA:(Z)-3-hexen-1-ol acetyltransferase	-3.9	0.0047	Down
20	20.1.99	stress.biotic.misc	AT3G16330	Avr9/Cf-9 rapidly elicited protein	1.1	0.0048	Up
20	20.1.99	stress.biotic.misc	AT3G62160	HXXXD-type acyl-transferase family protein	3.5	0.00051	Up
20	20.1.99	stress.biotic.misc	AT4G35270	Plant regulator RWP-RK family protein	-1.3	0.00084	Down
20	20.1.99	stress.biotic.misc	AT5G18930	Adenosylmethionine decarboxylase family protein	1.1	0.0084	Up
20	20.2	stress.abiotic	AT2G24550	major centromere autoantigen B-like protein	-1.2	0.00077	Down
20	20.2	stress.abiotic	AT2G28790	Pathogenesis-related thaumatin superfamily protein	1.8	0.00025	Up
20	20.2	stress.abiotic	AT3G15620	DNA photolyase family protein	1.8	0.00063	Up
20	20.2	stress.abiotic	AT5G52060	BCL-2-associated athanogene 1	1.5	1e-08	Up
20	20.2.1	stress.abiotic.heat	AT1G18740	ROH1%2C putative (DUF793)	-1.6	0.00082	Down
20	20.2.1	stress.abiotic.heat	AT1G20870	HSP20-like chaperones superfamily protein	3.1	0.0013	Up
20	20.2.1	stress.abiotic.heat	AT1G24120	ARG1-like 1	1	8.6e-07	Up
20	20.2.1	stress.abiotic.heat	AT1G35720	annexin 1	3	3.6e-05	Up
20	20.2.1	stress.abiotic.heat	AT1G46264	heat shock transcription factor B4	1.7	2.6e-05	Up
20	20.2.1	stress.abiotic.heat	AT1G47410	hypothetical protein	1.1	0.0063	Up
20	20.2.1	stress.abiotic.heat	AT1G67970	heat shock transcription factor A8	-1.5	4.1e-07	Down
20	20.2.1	stress.abiotic.heat	AT1G69400	Transducin/WD40 repeat-like superfamily protein	1.4	0.012	Up
20	20.2.1	stress.abiotic.heat	AT1G72610	germin-like protein 1	2.2	5e-05	Up
20	20.2.1	stress.abiotic.heat	AT1G73370	sucrose synthase 6	2.1	2.3e-07	Up
20	20.2.1	stress.abiotic.heat	AT1G74450	BPS1-like protein (DUF793)	-1.5	0.0015	Down
20	20.2.1	stress.abiotic.heat	AT1G75690	DnaJ/Hsp40 cysteine-rich domain superfamily protein	1.4	0.00015	Up
20	20.2.1	stress.abiotic.heat	AT2G17880	Chaperone DnaJ-domain superfamily protein	3.4	0.036	Up
20	20.2.1	stress.abiotic.heat	AT2G27140	HSP20-like chaperones superfamily protein	1.8	1.3e-05	Up
20	20.2.1	stress.abiotic.heat	AT2G33735	Chaperone DnaJ-domain superfamily protein	-1.8	0.00063	Down
20	20.2.1	stress.abiotic.heat	AT2G36050	ovate family protein 15	5	0.028	Up
20	20.2.1	stress.abiotic.heat	AT2G41690	heat shock transcription factor B3	2	0.045	Up
20	20.2.1	stress.abiotic.heat	AT3G10680	HSP20-like chaperones superfamily protein	1.7	0.00011	Up
20	20.2.1	stress.abiotic.heat	AT3G12170	Chaperone DnaJ-domain superfamily protein	4.3	0.018	Up
20	20.2.1	stress.abiotic.heat	AT3G27050	plant/protein	1.1	7e-06	Up
20	20.2.1	stress.abiotic.heat	AT3G51910	heat shock transcription factor A7A	-1.8	0.033	Down
20	20.2.1	stress.abiotic.heat	AT3G54000	TIP41-like protein	-1.1	0.023	Down
20	20.2.1	stress.abiotic.heat	AT3G62570	Tetratricopeptide repeat (TPR)-like superfamily protein	3.3	0.0045	Up
20	20.2.1	stress.abiotic.heat	AT3G62720	xylosyltransferase 1	-1.1	0.006	Down
20	20.2.1	stress.abiotic.heat	AT4G02100	Heat shock protein DnaJ with tetratricopeptide repeat-containing protein	1.4	0.00022	Up
20	20.2.1	stress.abiotic.heat	AT4G02380	senescence-associated gene 21	-3.3	3.2e-17	Down
20	20.2.1	stress.abiotic.heat	AT4G02390	poly(ADP-ribose) polymerase	1.6	0.0073	Up
20	20.2.1	stress.abiotic.heat	AT4G02410	Concanavalin A-like lectin protein kinase family protein	-1.5	3.7e-08	Down
20	20.2.1	stress.abiotic.heat	AT4G12400	stress-inducible protein	1.2	0.003	Up
20	20.2.1	stress.abiotic.heat	AT4G18880	heat shock transcription factor A4A	-2.2	4.4e-11	Down
20	20.2.1	stress.abiotic.heat	AT4G21490	NAD(P)H dehydrogenase B3	-2.9	0.0077	Down
20	20.2.1	stress.abiotic.heat	AT4G28250	expansin B3	2.8	6.1e-07	Up
20	20.2.1	stress.abiotic.heat	AT4G29920	Double Clp-N motif-containing P-loop nucleoside triphosphate hydrolases superfamily protein	1.4	0.0004	Up
20	20.2.1	stress.abiotic.heat	AT4G36040	Chaperone DnaJ-domain superfamily protein	-1.7	6.1e-14	Down
20	20.2.1	stress.abiotic.heat	AT5G04890	HSP20-like chaperones superfamily protein	1.5	9.7e-08	Up
20	20.2.1	stress.abiotic.heat	AT5G14760	L-aspartate oxidase	-1.7	2.3e-13	Down
20	20.2.1	stress.abiotic.heat	AT5G18970	AWPM-19-like family protein	1	0.002	Up
20	20.2.1	stress.abiotic.heat	AT5G20630	germin 3	9.2	0.0002	Up
20	20.2.1	stress.abiotic.heat	AT5G20970	HSP20-like chaperones superfamily protein	1.6	4.9e-11	Up
20	20.2.1	stress.abiotic.heat	AT5G22580	Stress responsive A/B Barrel Domain-containing protein	6.6	0.0035	Up
20	20.2.1	stress.abiotic.heat	AT5G22860	Serine carboxypeptidase S28 family protein	-1	0.043	Down
20	20.2.1	stress.abiotic.heat	AT5G37180	sucrose synthase 5	1.8	2.1e-07	Up
20	20.2.1	stress.abiotic.heat	AT5G37670	HSP20-like chaperones superfamily protein	-1.9	0.00032	Down
20	20.2.1	stress.abiotic.heat	AT5G48290	Heavy metal transport/detoxification superfamily protein	1.6	0.019	Up
20	20.2.1	stress.abiotic.heat	AT5G57130	Clp amino terminal domain-containing protein	1.2	7.9e-06	Up
20	20.2.1	stress.abiotic.heat	AT5G59720	heat shock protein 18.2	2.9	3.5e-05	Up
20	20.2.1	stress.abiotic.heat	AT5G62020	heat shock transcription factor B2A	-2.6	1.7e-08	Down
20	20.2.1	stress.abiotic.heat	AT5G65020	annexin 2	1.4	7.9e-06	Up
20	20.2.2	stress.abiotic.cold	AT1G05260	Peroxidase superfamily protein	3	0.00013	Up
20	20.2.2	stress.abiotic.cold	AT1G09070	soybean gene regulated by cold-2	-1.2	0.015	Down
20	20.2.2	stress.abiotic.cold	AT1G20080	Calcium-dependent lipid-binding (CaLB domain) family protein	1.7	1.9e-05	Up
20	20.2.2	stress.abiotic.cold	AT1G29395	COLD REGULATED 314 INNER MEMBRANE 1	1.5	5.6e-07	Up
20	20.2.2	stress.abiotic.cold	AT2G42530	cold regulated 15b	2.6	0.0027	Up
20	20.2.2	stress.abiotic.cold	AT2G42540	cold-regulated 15a	3.7	0.00064	Up
20	20.2.2	stress.abiotic.cold	AT3G05880	Low temperature and salt responsive protein family	1.1	0.0028	Up
20	20.2.2	stress.abiotic.cold	AT3G05890	Low temperature and salt responsive protein family	4.7	0.0032	Up
20	20.2.2	stress.abiotic.cold	AT3G21770	Peroxidase superfamily protein	1.3	0.0002	Up
20	20.2.2	stress.abiotic.cold	AT3G42660	transducin family protein / WD-40 repeat family protein	1.1	0.018	Up
20	20.2.2	stress.abiotic.cold	AT4G34150	Calcium-dependent lipid-binding (CaLB domain) family protein	-1.5	5.4e-07	Down
20	20.2.2	stress.abiotic.cold	AT5G12300	Calcium-dependent lipid-binding (CaLB domain) family protein	1.3	8.4e-07	Up
20	20.2.3	stress.abiotic.drought/salt	AT1G04430	S-adenosyl-L-methionine-dependent methyltransferases superfamily protein	1.3	0.0025	Up
20	20.2.3	stress.abiotic.drought/salt	AT1G18390	Serine/Threonine kinase family catalytic domain protein	-1.1	0.0019	Down
20	20.2.3	stress.abiotic.drought/salt	AT1G23750	Nucleic acid-binding%2C OB-fold-like protein	1.4	0.018	Up
20	20.2.3	stress.abiotic.drought/salt	AT1G28100	hypothetical protein	1.3	0.00061	Up
20	20.2.3	stress.abiotic.drought/salt	AT2G03480	QUASIMODO2 LIKE 2	1.2	0.0052	Up
20	20.2.3	stress.abiotic.drought/salt	AT2G34300	S-adenosyl-L-methionine-dependent methyltransferases superfamily protein	1.1	0.0038	Up
20	20.2.3	stress.abiotic.drought/salt	AT2G35190	Putative plant snare 11	2.1	1.4e-05	Up
20	20.2.3	stress.abiotic.drought/salt	AT2G41010	calmodulin (CAM)-binding protein of 25 kDa	-1.1	2.7e-11	Down
20	20.2.3	stress.abiotic.drought/salt	AT2G45750	S-adenosyl-L-methionine-dependent methyltransferases superfamily protein	1.4	0.00069	Up
20	20.2.3	stress.abiotic.drought/salt	AT3G05880	Low temperature and salt responsive protein family	1.1	0.0028	Up
20	20.2.3	stress.abiotic.drought/salt	AT3G05890	Low temperature and salt responsive protein family	4.7	0.0032	Up
20	20.2.3	stress.abiotic.drought/salt	AT3G56880	VQ motif-containing protein	-1.7	1.8e-07	Down
20	20.2.3	stress.abiotic.drought/salt	AT3G62730	desiccation-like protein	2	7.6e-10	Up
20	20.2.3	stress.abiotic.drought/salt	AT4G00750	S-adenosyl-L-methionine-dependent methyltransferases superfamily protein	-1.4	1.7e-12	Down
20	20.2.3	stress.abiotic.drought/salt	AT4G02200	Drought-responsive family protein	-1.1	1.4e-06	Down
20	20.2.3	stress.abiotic.drought/salt	AT4G10440	S-adenosyl-L-methionine-dependent methyltransferases superfamily protein	-1.5	0.048	Down
20	20.2.3	stress.abiotic.drought/salt	AT4G15430	ERD (early-responsive to dehydration stress) family protein	2	0.00012	Up
20	20.2.3	stress.abiotic.drought/salt	AT4G19120	S-adenosyl-L-methionine-dependent methyltransferases superfamily protein	2	9.3e-06	Up
20	20.2.3	stress.abiotic.drought/salt	AT4G25490	C-repeat/DRE binding factor 1	-1.7	0.043	Down
20	20.2.3	stress.abiotic.drought/salt	AT5G08400	structural maintenance of chromosomes-like protein%2C putative (DUF3531)	-1.1	0.00041	Down
20	20.2.3	stress.abiotic.drought/salt	AT5G11780	SNF2 domain protein	1.2	0.019	Up
20	20.2.3	stress.abiotic.drought/salt	AT5G24310	ABL interactor-like protein 3	1.3	0.0013	Up
20	20.2.3	stress.abiotic.drought/salt	AT5G41900	alpha/beta-Hydrolases superfamily protein	4.1	1.1e-07	Up
20	20.2.3	stress.abiotic.drought/salt	AT5G51990	C-repeat-binding factor 4	-1.9	0.037	Down
20	20.2.3	stress.abiotic.drought/salt	AT5G52020	Integrase-type DNA-binding superfamily protein	-2.8	0.0049	Down
20	20.2.3	stress.abiotic.drought/salt	ATCG01110	NAD(P)H dehydrogenase subunit H	1.9	0.014	Up
20	20.2.4	stress.abiotic.touch/wounding	AT3G03030	F-box/RNI-like superfamily protein	-1.4	0.007	Down
20	20.2.4	stress.abiotic.touch/wounding	AT4G10270	Wound-responsive family protein	2.2	0.033	Up
20	20.2.5	stress.abiotic.light	AT2G36800	don-glucosyltransferase 1	-1.5	5.7e-09	Down
20	20.2.5	stress.abiotic.light	AT3G22840	Chlorophyll A-B binding family protein	-1.7	0.00046	Down
20	20.2.5	stress.abiotic.light	AT4G14690	Chlorophyll A-B binding family protein	-1.5	0.0015	Down
20	20.2.99	stress.abiotic.unspecified	AT1G02335	germin-like protein subfamily 2 member 2 precursor	1.9	2.8e-08	Up
20	20.2.99	stress.abiotic.unspecified	AT1G09740	Adenine nucleotide alpha hydrolases-like superfamily protein	-2.1	4.7e-07	Down
20	20.2.99	stress.abiotic.unspecified	AT1G10120	basic helix-loop-helix (bHLH) DNA-binding superfamily protein	1	0.0001	Up
20	20.2.99	stress.abiotic.unspecified	AT1G23130	Polyketide cyclase/dehydrase and lipid transport superfamily protein	-1.9	0.0073	Down
20	20.2.99	stress.abiotic.unspecified	AT1G28290	arabinogalactan protein 31	1.5	0.0018	Up
20	20.2.99	stress.abiotic.unspecified	AT1G69080	Adenine nucleotide alpha hydrolases-like superfamily protein	1.4	6.3e-07	Up
20	20.2.99	stress.abiotic.unspecified	AT1G70890	MLP-like protein 43	1.1	0.018	Up
20	20.2.99	stress.abiotic.unspecified	AT2G01520	MLP-like protein 328	-2.5	0.0028	Down
20	20.2.99	stress.abiotic.unspecified	AT2G19970	CAP (Cysteine-rich secretory proteins%2C Antigen 5%2C and Pathogenesis-related 1 protein) superfamily protein	3.5	0.0015	Up
20	20.2.99	stress.abiotic.unspecified	AT2G23690	HTH-type transcriptional regulator	2.6	3.1e-05	Up
20	20.2.99	stress.abiotic.unspecified	AT2G29050	RHOMBOID-like 1	1.7	3.9e-06	Up
20	20.2.99	stress.abiotic.unspecified	AT2G37585	Core-2/I-branching beta-1%2C6-N-acetylglucosaminyltransferase family protein	1.7	2.7e-07	Up
20	20.2.99	stress.abiotic.unspecified	AT2G40330	PYR1-like 6	-1.2	0.0028	Down
20	20.2.99	stress.abiotic.unspecified	AT3G10080	RmlC-like cupins superfamily protein	2.1	7.1e-06	Up
20	20.2.99	stress.abiotic.unspecified	AT3G62020	germin-like protein 10	1.7	8.7e-06	Up
20	20.2.99	stress.abiotic.unspecified	AT4G08685	Pollen Ole e 1 allergen and extensin family protein	2.1	4.2e-05	Up
20	20.2.99	stress.abiotic.unspecified	AT4G13450	Adenine nucleotide alpha hydrolases-like superfamily protein	8	0.007	Up
20	20.2.99	stress.abiotic.unspecified	AT4G21120	amino acid transporter 1	-1.6	9.7e-05	Down
20	20.2.99	stress.abiotic.unspecified	AT5G03960	IQ-domain 12	4.9	0.031	Up
20	20.2.99	stress.abiotic.unspecified	AT5G13460	IQ-domain 11	1.7	0.00029	Up
[truncated: 3,354 more rows]
