# Supplementary material
Source: publisher figshare collection journal article supplement (https://gsajournals.figshare.com/articles/dataset/_/6391991)

FPKM

*PtAN1*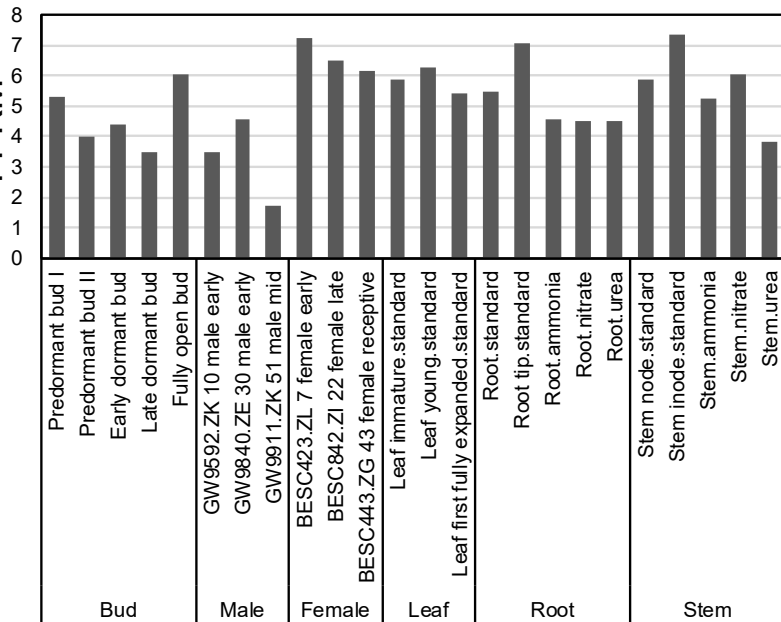*PtAN2*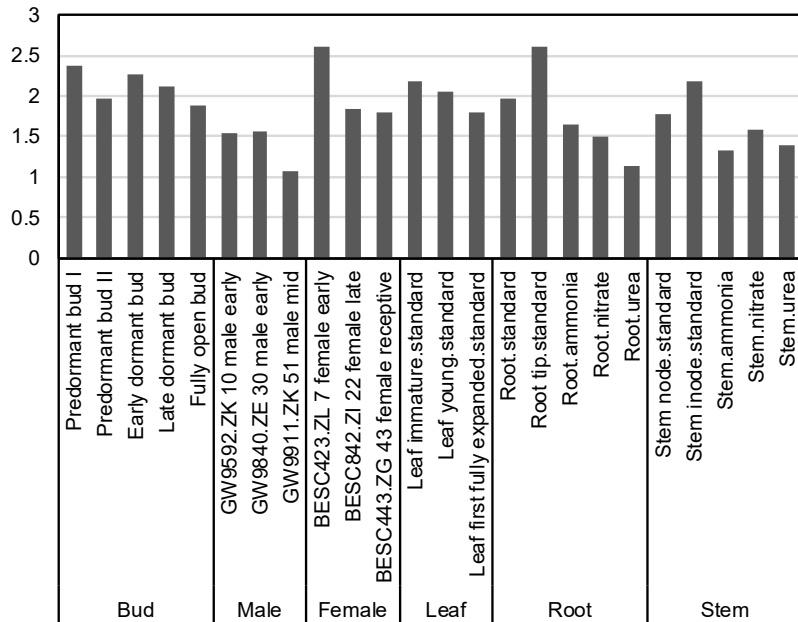

Supplement: Supplementary file 2 [file 1]

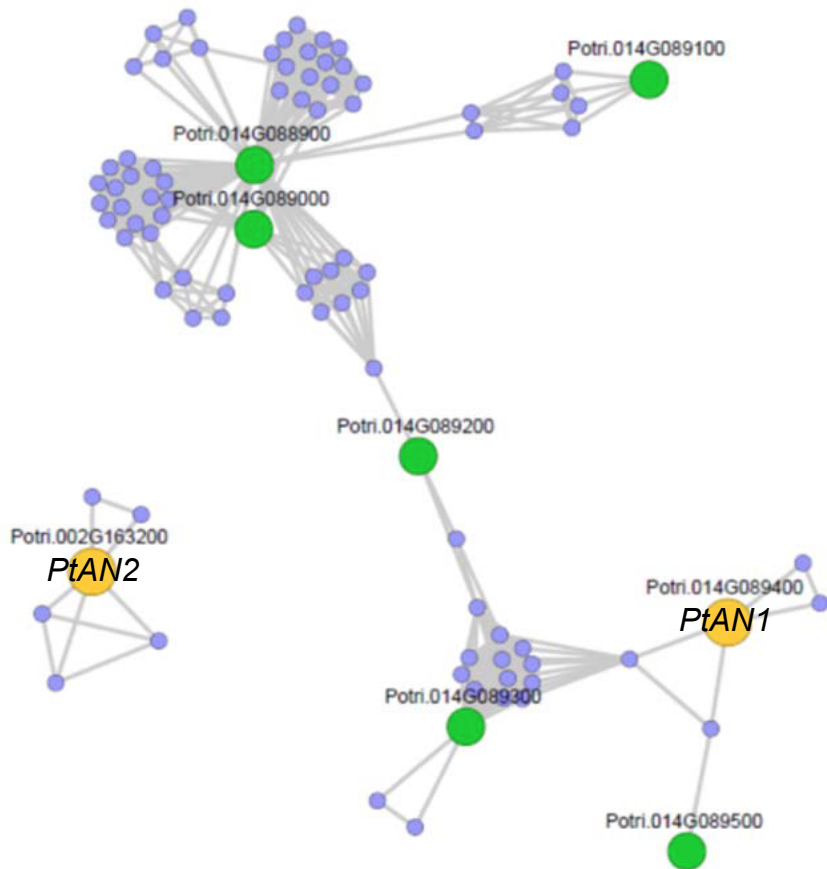

Supplement: Supplementary file 3 [file 1]
